# Supplementary material for: Mapping multimorbidity in individuals with schizophrenia and bipolar disorders: evidence from the South London and Maudsley NHS Foundation Trust Biomedical Research Centre (SLAM BRC) case register
Source: PubMed Central journal article supplement (PMC8788233; doi:10.1136/bmjopen-2021-054414), 2022-01-24
Supplement: bmjopen-2021-054414.draft_revisions.pdf [file bmjopen-2021-054414.draft_revisions.pdf]

# BMJ Open

BMJ Open is committed to open peer review. As part of this commitment we make the peer review history of every article we publish publicly available.

When an article is published we post the peer reviewers' comments and the authors' responses online. We also post the versions of the paper that were used during peer review. These are the versions that the peer review comments apply to.

The versions of the paper that follow are the versions that were submitted during the peer review process. They are not the versions of record or the final published versions. They should not be cited or distributed as the published version of this manuscript.

BMJ Open is an open access journal and the full, final, typeset and author-corrected version of record of the manuscript is available on our site with no access controls, subscription charges or pay-per-view fees (<http://bmjopen.bmj.com>).

If you have any questions on BMJ Open's open peer review process please email [info.bmjopen@bmj.com](mailto:info.bmjopen@bmj.com)

# BMJ Open

## Mapping Multimorbidity in Individuals with Schizophrenia and Bipolar Disorders: Evidence from the South London and Maudsley NHS Foundation Trust Biomedical Research Centre (SLAM BRC) Case Register

|                               |                                                                                                                                                                                                                                                                                                                                                                                                                                                                                                                                                                                                                                                                                                                                                                                                                                                                                                                                                                                                                                                                                                                                                                                                                                                                                                                                                                                                                                                                                                                                                                                                                                                                                                                                                                                                                                                                                                                                                                                                                                                                                                                                                                                                                                                                                                                                                             |
|-------------------------------|-------------------------------------------------------------------------------------------------------------------------------------------------------------------------------------------------------------------------------------------------------------------------------------------------------------------------------------------------------------------------------------------------------------------------------------------------------------------------------------------------------------------------------------------------------------------------------------------------------------------------------------------------------------------------------------------------------------------------------------------------------------------------------------------------------------------------------------------------------------------------------------------------------------------------------------------------------------------------------------------------------------------------------------------------------------------------------------------------------------------------------------------------------------------------------------------------------------------------------------------------------------------------------------------------------------------------------------------------------------------------------------------------------------------------------------------------------------------------------------------------------------------------------------------------------------------------------------------------------------------------------------------------------------------------------------------------------------------------------------------------------------------------------------------------------------------------------------------------------------------------------------------------------------------------------------------------------------------------------------------------------------------------------------------------------------------------------------------------------------------------------------------------------------------------------------------------------------------------------------------------------------------------------------------------------------------------------------------------------------|
| Journal:                      | <i>BMJ Open</i>                                                                                                                                                                                                                                                                                                                                                                                                                                                                                                                                                                                                                                                                                                                                                                                                                                                                                                                                                                                                                                                                                                                                                                                                                                                                                                                                                                                                                                                                                                                                                                                                                                                                                                                                                                                                                                                                                                                                                                                                                                                                                                                                                                                                                                                                                                                                             |
| Manuscript ID                 | bmjopen-2021-054414                                                                                                                                                                                                                                                                                                                                                                                                                                                                                                                                                                                                                                                                                                                                                                                                                                                                                                                                                                                                                                                                                                                                                                                                                                                                                                                                                                                                                                                                                                                                                                                                                                                                                                                                                                                                                                                                                                                                                                                                                                                                                                                                                                                                                                                                                                                                         |
| Article Type:                 | Original research                                                                                                                                                                                                                                                                                                                                                                                                                                                                                                                                                                                                                                                                                                                                                                                                                                                                                                                                                                                                                                                                                                                                                                                                                                                                                                                                                                                                                                                                                                                                                                                                                                                                                                                                                                                                                                                                                                                                                                                                                                                                                                                                                                                                                                                                                                                                           |
| Date Submitted by the Author: | 10-Jun-2021                                                                                                                                                                                                                                                                                                                                                                                                                                                                                                                                                                                                                                                                                                                                                                                                                                                                                                                                                                                                                                                                                                                                                                                                                                                                                                                                                                                                                                                                                                                                                                                                                                                                                                                                                                                                                                                                                                                                                                                                                                                                                                                                                                                                                                                                                                                                                 |
| Complete List of Authors:     | <p>Bendayan, Rebecca; King's College London, Biostatistics and Health Informatics, Institute of Psychiatry, Psychology and Neurosciences; NIHR Biomedical Research Centre at South London and Maudsley NHS Foundation Trust and King's College London, London, United Kingdom</p> <p>Kraljevic, Zeljko; King's College London, Biostatistics and Health Informatics, Institute of Psychiatry, Psychology and Neuroscience</p> <p>Shaari, Shaweena; NIHR Biomedical Research Centre at South London and Maudsley NHS Foundation Trust and King's College London, London, United Kingdom</p> <p>Das-Munshi, Jayati; King's College London Institute of Psychiatry Psychology and Neuroscience, Psychological Medicine</p> <p>Leipold, Leona; NIHR Biomedical Research Centre at South London and Maudsley NHS Foundation Trust and King's College London, London, United Kingdom</p> <p>Chaturvedi, Jaya; King's College London, Biostatistics and Health Informatics, Institute of Psychiatry, Psychology and Neuroscience</p> <p>Mirza, Luwaiza; NIHR Biomedical Research Centre at South London and Maudsley NHS Foundation Trust and King's College London, London, United Kingdom</p> <p>Aldelemi, Sarah; NIHR Biomedical Research Centre at South London and Maudsley NHS Foundation Trust and King's College London, London, United Kingdom</p> <p>Searle, Thomas; King's College London, Department of Biostatistics and Health Informatics</p> <p>Chance, Natalia; NIHR Biomedical Research Centre at South London and Maudsley NHS Foundation Trust and King's College London, London, United Kingdom</p> <p>Mascio, Aurelie; King's College London, Biostatistics and Health Informatics, Institute of Psychiatry, Psychology and Neuroscience</p> <p>Skiada, Naoko; King's College London, Biostatistics and Health Informatics, Institute of Psychiatry, Psychology and Neuroscience</p> <p>Wang, Tao; Department of Biostatistics and Health Informatics, Institute of Psychiatry, Psychology and Neuroscience, King's College London, London, United Kingdom</p> <p>Roberts, Angus; King's College London, Biostatistics and Health Informatics, Institute of Psychiatry, Psychology and Neuroscience; NIHR Biomedical Research Centre at South London and Maudsley NHS Foundation Trust and King's College London, London, United Kingdom</p> |

1  
2  
3  
4  
5  
6  
7  
8  
9  
10  
11  
12  
13  
14  
15  
16  
17  
18  
19  
20  
21  
22  
23  
24  
25  
26  
27  
28  
29  
30  
31  
32  
33  
34  
35  
36  
37  
38  
39  
40  
41  
42  
43  
44  
45  
46  
47  
48  
49  
50  
51  
52  
53  
54  
55  
56  
57  
58  
59  
60

|           |                                                                                                                                                                                                                                                                                                                             |
|-----------|-----------------------------------------------------------------------------------------------------------------------------------------------------------------------------------------------------------------------------------------------------------------------------------------------------------------------------|
|           | Stewart, Robert; King's College London, Psychological Medicine; NIHR Biomedical Research Centre at South London and Maudsley NHS Foundation Trust and King's College London, London, United Kingdom<br>Bean, Daniel; King's College London, Biostatistics and Health Informatics<br>Dobson, Richard; King's College London, |
| Keywords: | Health informatics < BIOTECHNOLOGY & BIOINFORMATICS, EPIDEMIOLOGY, MENTAL HEALTH, PSYCHIATRY, PUBLIC HEALTH                                                                                                                                                                                                                 |
|           |                                                                                                                                                                                                                                                                                                                             |

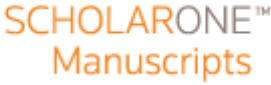

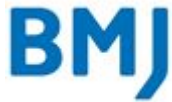

I, the Submitting Author has the right to grant and does grant on behalf of all authors of the Work (as defined in the below author licence), an exclusive licence and/or a non-exclusive licence for contributions from authors who are: i) UK Crown employees; ii) where BMJ has agreed a CC-BY licence shall apply, and/or iii) in accordance with the terms applicable for US Federal Government officers or employees acting as part of their official duties; on a worldwide, perpetual, irrevocable, royalty-free basis to BMJ Publishing Group Ltd ("BMJ") its licensees and where the relevant Journal is co-owned by BMJ to the co-owners of the Journal, to publish the Work in this journal and any other BMJ products and to exploit all rights, as set out in our [licence](#).

The Submitting Author accepts and understands that any supply made under these terms is made by BMJ to the Submitting Author unless you are acting as an employee on behalf of your employer or a postgraduate student of an affiliated institution which is paying any applicable article publishing charge ("APC") for Open Access articles. Where the Submitting Author wishes to make the Work available on an Open Access basis (and intends to pay the relevant APC), the terms of reuse of such Open Access shall be governed by a Creative Commons licence – details of these licences and which [Creative Commons](#) licence will apply to this Work are set out in our licence referred to above.

Other than as permitted in any relevant BMJ Author's Self Archiving Policies, I confirm this Work has not been accepted for publication elsewhere, is not being considered for publication elsewhere and does not duplicate material already published. I confirm all authors consent to publication of this Work and authorise the granting of this licence.

1  
2  
3 **Mapping Multimorbidity in Individuals with Schizophrenia and Bipolar Disorders:**  
4  
5 **Evidence from the South London and Maudsley NHS Foundation Trust Biomedical**  
6  
7 **Research Centre (SLAM BRC) Case Register**  
8  
9

10 Rebecca Bendayan<sup>1,2</sup>, Zeljko Kraljevic<sup>2</sup>, Shaweena Shaari<sup>1</sup>, Jayati Das-Munshi<sup>3</sup>, Leona Leipold<sup>1</sup>,  
11  
12 Jaya Chaturvedi<sup>2</sup>, Luwaiza Mirza<sup>1</sup>, Sarah Aldelemi<sup>1</sup>, Tom Searle<sup>2</sup>, Natalia Chance<sup>1</sup>, Aurelie  
13  
14 Mascio<sup>2</sup>, Naoko Skiada<sup>2</sup>, Angus Roberts<sup>1,2</sup>, Robert Stewart<sup>1,3</sup>, Daniel Bean<sup>2,4</sup>, Richard Dobson<sup>1,2,5</sup>  
15  
16  
17

18 <sup>1</sup>NIHR Biomedical Research Centre at South London and Maudsley NHS Foundation Trust and  
19 King's College London, London, United Kingdom  
20

21 <sup>2</sup>Department of Biostatistics and Health Informatics, Institute of Psychiatry, Psychology and  
22 Neuroscience, King's College London, London, United Kingdom  
23  
24

25 <sup>3</sup>Department of Psychological Medicine, Institute of Psychiatry, Psychology and Neuroscience,  
26 King's College London, London, United Kingdom  
27

28 <sup>4</sup>Health Data Research UK London, University College London, London, United Kingdom  
29

30 <sup>5</sup>Institute of Health Informatics, University College London, London, United Kingdom  
31  
32

33 **Word count: 3920**  
34

35 **Correspondence:**

36 Rebecca Bendayan / ORCID: 0000-0003-1461-556X

37 E-mail: [rebecca.bendayan@kcl.ac.uk](mailto:rebecca.bendayan@kcl.ac.uk)

38 NIHR Maudsley Biomedical Research Centre

39 Department of Biostatistics & Health Informatics

40 SGDP Centre, IoPPN, Box PO 80

41 De Crespigny Park, Denmark Hill

42 London SE5 8AF, UNITED KINGDOM  
43  
44  
45  
46  
47  
48  
49  
50  
51  
52  
53  
54  
55  
56  
57  
58  
59  
60

## Abstract

**Objectives:** The first aim of this study was to design and develop a valid and replicable strategy to extract physical health conditions from clinical notes which are common in mental health services. Then, we examined the prevalence of these conditions in individuals with SMI and compared their individual and combined prevalence in individuals with bipolar (BD) and schizophrenia spectrum disorders (SSD).

**Design:** Observational study.

**Setting:** Secondary mental healthcare services from South London

**Participants:** Our maximal sample comprised 17,500 individuals aged 15 years or older who had received a primary or secondary SMI diagnosis (ICD-10, F20-31) between 2007 and 2018.

**Measures:** We designed and implemented a data extraction strategy for 21 common physical comorbidities using a natural language processing pipeline, MedCAT. Associations were investigated with sex, age at SMI diagnosis, ethnicity and social deprivation for the whole cohort and the BD and SSD subgroups. Linear regression models were used to examine associations with disability measured by the Health of Nations Outcome Scale (HoNOS).

**Results:** Physical health data was extracted, achieving precision rates (F1) above 0.90 for all conditions. The ten most prevalent conditions were diabetes, hypertension, asthma, arthritis, epilepsy, cerebrovascular accident, eczema, migraine, ischaemic heart disease and COPD. The most prevalent combination in this population included diabetes, hypertension and asthma, regardless of their SMI diagnoses.

**Conclusions:** Our data extraction strategy was found to be adequate to extract physical health data from clinical notes, which is essential for future multimorbidity research using text records. We found that around 40% of our cohort had multimorbidity from which 20% had complex

1  
2  
3 multimorbidity (two or more physical conditions besides SMI). Sex, age, ethnicity and social  
4  
5 deprivation were found to be key to understand their heterogeneity and their differential  
6  
7 contribution to disability levels in this population. These outputs have direct implications for  
8  
9 researchers and clinicians.  
10

### 11 **Strengths and limitations of this study**

- 14 - We designed and implemented a data extraction strategy with good which showed high  
15 performance rates and allowed us to unlock data from 21 physical health conditions from  
16 around 15m clinical documents with free text.
- 17 - We mapped how these health conditions are distributed across sex, age, ethnicity, social  
18 disadvantage and severe mental illness diagnoses in a sample of 17500 patients from one  
19 of Europe's largest providers of secondary mental healthcare, serving a geographic  
20 catchment of approximately 1.32 million residents in London.
- 21 - The ten most prevalent conditions in this SMI cohort were diabetes, hypertension, asthma,  
22 arthritis, epilepsy, cerebrovascular accident, eczema, migraine, ischaemic heart disease and  
23 COPD. The most prevalent combination in this population included diabetes, hypertension  
24 and asthma, regardless of their SMI diagnoses.
- 25 - Multimorbidity (2 or more conditions) is associated with high levels of disability in this  
26 population and independent reports of any of the ten most prevalent conditions are also  
27 associated with high levels of disability.
- 28 - Further research is needed to understand potential explanatory pathways for the association  
29 between multimorbidity and disability in this population.  
30  
31  
32  
33  
34  
35  
36  
37  
38  
39  
40  
41  
42  
43  
44  
45  
46  
47  
48  
49  
50  
51  
52  
53  
54  
55  
56  
57  
58  
59  
60

## Introduction

Two thirds of the deaths in individuals with severe mental illness (SMI) are potentially explained by the increased risk of multimorbidity in this population.[1–4] However, multimorbidity research in this population is still scarce[5] compounded by the limited availability of physical health data in SMI samples, increased non-response rates in surveys,[6] and physical health information in secondary mental health care data primarily hidden in free text fields.

Most research to date on physical health in SMI populations has focused on cardiometabolic risk factors which are considered leading contributors to cardiovascular diseases in individuals with SMI,[7–10] or specific conditions such as immune-mediated inflammatory diseases (e.g., inflammatory bowel diseases, psoriasis),[11–13] multiple sclerosis, epilepsy or migraine.[14,15] This condition-specific vision limits our understanding of multimorbidity in SMI and studies that consider a larger number of conditions are needed. However, there are only a few studies which have considered multiple health conditions.[4,16,17] Woodhead et al.[4] showed an increased risk in multimorbidity in SMI patients, but only found epilepsy to be more prevalent as an individual condition. Kugathasan et al.[17] investigated combinations of diseases in schizophrenia at organ system level and found that 31% had complex multimorbidity with the most prevalent pairs including neurologic-endocrine, neurologic-respiratory and neurologic-viral. Similarly, epilepsy and arthritis was one of the most prevalent combinations found by Dorrington et al.[16] Although these studies included multiple health conditions and confirmed the need of investigating further multimorbidity in SMI, they are still not comparable to multimorbidity studies in general populations[18–20] and did not investigate potential differences between individuals with schizophrenia spectrum disorders (SSD) and bipolar disorders (BD). Understanding different multimorbidity combinations between those groups could contribute to the ongoing debate around



1  
2  
3 potential underlying biological mechanisms.[21–23] Ultimately, SSD and BD have been  
4 established as significant drivers of disability[24] and deficits in physical health have been  
5 implicated in the perpetuation of impairments in functional capacity and performance,[25,26]  
6  
7 however, research into the relationship between multimorbidity and disability in SMI is limited.  
8  
9 Within this context, our first aim was to design and develop a suitable strategy to extract  
10 information on physical health conditions from free text mental health records data which could  
11 be easily replicated in future multimorbidity research using similar resources. Our second objective  
12 was to examine the prevalence of these conditions and their most prevalent combinations in SMI  
13 and any differences across relevant sociodemographic factors and across SMI diagnoses (SSD vs  
14 BD). Our third objective was to investigate the association of overall multimorbidity and specific  
15 physical health conditions with levels of disability measured using the Health of the Nation  
16 Outcome Scales (HoNOS).  
17  
18  
19  
20  
21  
22  
23  
24  
25  
26  
27  
28  
29

## 30 **Methods**

### 31 *Setting and sample*

32  
33 Patient data were extracted via the Clinical Record Interactive Search (CRIS), a case register  
34 platform that contains de-identified mental healthcare electronic health record data from the South  
35 London and Maudsley Trust NHS Foundation Trust (SLaM). SLaM is one of Europe's largest  
36 providers of secondary mental healthcare, serving a geographic catchment of approximately 1.32  
37 million residents, and providing almost complete coverage of secondary mental healthcare  
38 provision to all age groups. Since 2007, fully electronic clinical records have been deployed in  
39 SLaM, and data from these are accessible via CRIS system which allows searching and retrieval  
40 of anonymized full records for over 500,000 cases currently represented in the system.[27]  
41  
42  
43  
44  
45  
46  
47  
48  
49  
50  
51  
52  
53  
54  
55  
56  
57  
58  
59  
60

1  
2  
3 Our sample (N=17500) consisted of all individuals aged 15 years or older who had received a  
4 primary or secondary SMI diagnosis between 2007 and 2018 (International Classification of  
5 Mental and Behavioural Disorders 10<sup>th</sup> edition [ICD-10][28] codes F20-31). As one of our  
6 objectives was to compare SSD (F20-29) and BD (F30-31), individuals who over those 10 years  
7 of follow-up had diagnoses within both categories were excluded (n=804). Excluded individuals  
8 were more likely to be female, under the age of 35 at first SMI diagnosis recorded, Black ethnicity  
9 and have higher levels of social deprivation.  
10  
11  
12  
13  
14  
15  
16  
17  
18

### 19 *Physical health conditions*

20  
21 *Definitions and Information extraction.* To maximise comparability we sought to extract the  
22 following 21 physical health conditions representing chronic conditions commonly collected in  
23 multimorbidity studies using primary care data:[18–20] diabetes mellitus, heart failure, ischemic  
24 heart diseases, hypertension, coronary arteriosclerosis, chronic obstructive pulmonary disease  
25 (COPD), asthma, chronic kidney disease, cerebrovascular accident, transient ischemic attack,  
26 Parkinson's disease, multiple sclerosis, epilepsy, migraine, atrial fibrillation, chronic sinusitis,  
27 inflammatory bowel disease, chronic liver diseases, psoriasis, eczema and arthritis. These were  
28 mapped to SNOMED codes where the top concept was the group identifier and then all direct  
29 children of that concept were examined and individually reviewed by two clinicians (Appendix 1).  
30  
31  
32  
33  
34  
35  
36  
37  
38  
39  
40  
41  
42  
43  
44  
45  
46  
47  
48  
49  
50  
51  
52  
53  
54  
55  
56  
57  
58  
59  
60  
Physical health conditions were ascertained from data reported in text records from CRIS since  
2007 until 1st August 2019 for each individual resulting in around 15m documents.

To extract SNOMED concepts from the free text we used MedCAT,[29] a medical concept  
annotation toolkit capable of named entity recognition linking (NER+L) with contextualization.  
The base model used is described in Kraljevic et al.,[29] and has shown very good performance  
(F1=0.90). In a first step, the base model was enriched with concept names from UMLS with the

1  
2  
3 purpose of increasing recall and potentially catching all different name-forms for each concept. In  
4  
5 a second step, to increase precision, MedCAT was trained in an unsupervised fashion on all the  
6  
7 available documents; and in a third step, all the free text was annotated for the chosen SNOMED  
8  
9 concepts. For each condition, 300 documents were randomly extracted, which resulted in a total  
10  
11 of 6300 annotated documents.  
12  
13

14 *Annotation of physical health conditions.* To ensure consistent, high-quality gold standard and  
15  
16 training data, we developed annotation guidelines based on series of iterative discussions including  
17  
18 clinical and technical expertise. These guidelines, available upon request, were piloted and refined  
19  
20 in preliminary stages. A relevant instance was defined as a mention of a physical health condition  
21  
22 experienced by the patient and not negated. Each MedCAT detection was first validated as either  
23  
24 correct/wrong - meaning the portion of text that was detected by MedCAT was either a  
25  
26 correct/wrong detection of the relevant concept. Correct detections were further annotated with  
27  
28 contextual annotations (or meta-annotations) for 'Diagnosis' and 'Status'. Diagnosis was used to  
29  
30 determine if the detected concept is a patient related diagnosis, and Status if the detected concept  
31  
32 is affirmed. Eight annotators were trained for this task and given the same  
33  
34 instructions. MedCATtrainer[30] was used to facilitate manual annotations and each document  
35  
36 was double annotated. Disagreements between annotators were further evaluated and resolved by  
37  
38 a third annotator.  
39  
40  
41  
42  
43

44 *Training and validation.* Once the dataset was annotated it was split into a training and validation  
45  
46 set. For NER+L, 70% of the dataset was used for training and 30% for validation. For meta-  
47  
48 annotations, 80% was used for training and 20% for validation. Hyperparameter optimization in  
49  
50 both cases used a 10-fold cross validation on the training set.  
51  
52  
53  
54  
55  
56  
57  
58  
59  
60

1  
2  
3 *Socio-demographics.* Extracted data included sex, age at SMI diagnosis (15-24, 25-34, 35-44, 45-  
4 54, 55-64, 65-74, 75+), and ethnicity (White British, Irish, Black Caribbean (including mixed  
5 White and Black Caribbean and any other Black background), Black African (including mixed  
6 White and Black African), South Asian (Indian, Pakistani and Bangladeshi) and Other). Index of  
7 Multiple Deprivation (IMD) was extracted as a measure of neighbourhood socioeconomic status  
8 at the level of the 2011 Lower Layer Super Output Area (LSOA11; a standard postal unit with an  
9 average 1500 residents) corresponding to the individual's address at time of SMI diagnosis. Using  
10 the IMD, each LSOA11 is ranked from 1 (most deprived) to 32,844 (least deprived) based on seven  
11 Census-derived indicators, which was subsequently divided into quintiles.[31]

12  
13  
14  
15  
16  
17  
18  
19  
20  
21  
22  
23  
24 *Disability.* Disability was measured using Health of the Nation Outcome Scales (HoNOS):[32] a  
25 clinician-rated tool developed to measure health and social functioning. It includes 12 subscales:  
26 agitated behaviour; non-accidental self-injury; problem drinking or drug taking; cognitive  
27 problems; physical illness problems; problems associated with hallucinations or delusions;  
28 problems associated with depression; other mental and behaviour problems; problems with  
29 relationships; problems with activities of daily living; problems with living conditions; and  
30 problems with occupation and activities.[32] Total adjusted HoNOS scores of individuals at the  
31 first SMI diagnosis recorded in CRIS, or closest to that time, were used in this study. Higher scores  
32 for HoNOS indicate higher levels of impairment in the individual's functioning.

#### 33 34 35 36 37 38 39 40 41 42 43 44 45 *Statistical Analyses*

46  
47 To explore the suitability of MedCAT for extracting these physical health conditions from this  
48 cohort (objective 1), inter-rater agreement estimates were computed and performance, precision  
49 and recall per condition were estimated.  
50  
51  
52  
53  
54  
55  
56  
57  
58  
59  
60

1  
2  
3 To examine the prevalence of these conditions in SMI across relevant factors and compare the  
4 most prevalent multimorbidity combinations for individuals with BD and SSD (objective 2).  
5  
6 Descriptive statistics were derived for all the variables. Chi-square tests and Fisher's exact tests,  
7  
8 with Bonferroni correction for multiple comparisons, were performed to explore associations with  
9  
10 covariates differences between BD and SSD.  
11  
12

13  
14 To address our third objective (to investigate the association of multimorbidity and specific  
15  
16 physical health with levels of disability), we performed series of hierarchical linear regressions.  
17  
18 Models were adjusted by age and sex (Model 1), and then additionally adjusted by IMD (Model  
19  
20 2a) or SMI diagnosis (Model 2b). All analyses were performed using R 4.0.3 and RStudio  
21  
22 1.3.1093.  
23  
24

#### 25 26 *Patient and Public Involvement Statement*

27  
28 When designing this project, the Data Linkage Service User and Carer Advisory Group was  
29  
30 consulted and followed up presenting preliminary results. This is a well-established Patient and  
31  
32 Public Involvement Group set up by the Biomedical Research Center (BRC) at South London and  
33  
34 Maudsley Trust NHS Foundation Trust (SLaM).[33]  
35  
36

#### 37 38 **Results**

##### 39 40 *Inter-annotator agreement and model validation for data extraction*

41  
42 For each physical health condition, 300 documents were annotated to create a gold standard and  
43  
44 training data specific to each condition. All 6300 instances across 21 health conditions were double  
45  
46 annotated yielding an average inter-annotator agreement of 97% for NER+L, 82.70% for the meta-  
47  
48 annotation Diagnosis and 78.08% for the meta-annotation Status. Precision, recall and F1 metrics  
49  
50 of each modelled physical health condition are shown in Table 1. Coronary arteriosclerosis was  
51  
52 not extracted as the number of positive mentions was too small for training and validation. Overall  
53  
54  
55  
56  
57  
58  
59  
60

1  
2  
3 meta-annotations performance results showed good performance for Diagnosis and Status  
4  
5 (Supplemental Table 1).  
6

7  
8 PLEASE INSERT TABLE 1  
9

10 *Mapping of physical health conditions and comparison between SSD and BD*

11  
12 Our sample consisted of 17,500 individuals with SMI, of whom 74.4% were diagnosed with SSD  
13  
14 and 25.6% with BD. A slight majority were male (53.6%), and most individuals had their first SMI  
15  
16 diagnoses report under the age of 35 (42.8%). The White British group accounted for 35.7%, with  
17  
18 Black Caribbean (18.2%) and Black African (12.0%) groups being the next two largest groups and  
19  
20 South Asian and Irish groups were the smallest, with 3.1 and 2.0% respectively (Table 2). There  
21  
22 were high levels of deprivation in the cohort, with over 60% falling into the lowest two national  
23  
24 quintiles. Around 40% had at least one mention of a physical health condition and around 20%  
25  
26 had two or more physical conditions. There were significant differences between BD and SSD for  
27  
28 most of the socio-demographic characteristics and number of physical health conditions (Table 2  
29  
30 and Figure 1). Individuals with SSD were more likely to be men, from ethnic minorities, living in  
31  
32 more deprived neighbourhoods and had a higher number of physical health conditions recorded  
33  
34 compared those with BD.  
35  
36  
37  
38  
39

40 The three most common physical health conditions recorded were diabetes, hypertension and  
41  
42 asthma (15.3%, 14.5% and 9.8% respectively), regardless of the specific SMI diagnoses  
43  
44 (Supplemental Figure 1 within SSD and BD). When we compared individuals with SSD and BD,  
45  
46 we found that the top 10 most prevalent health conditions were similar between groups but diabetes  
47  
48 (SSD 17% vs BD 10.7%), hypertension (SSD 15.9% vs BD 10.4%) and epilepsy (SSD 5.0% vs  
49  
50 BD 3.3%) prevalence rates were slightly higher for individuals with SSD while individuals with  
51  
52 BD showed higher prevalence rates of migraine (BD 4.3% vs SSD 2.9%).  
53  
54  
55  
56  
57  
58  
59  
60

## PLEASE INSERT TABLE 2 AND FIGURE 1 HERE

When we explored differences by sex in the whole cohort, we found that women were more likely to report hypertension, asthma, arthritis, eczema, and migraine compared to men (Supplemental Table 2). Within the individuals with SSD, women were in addition found to be more likely to report higher rates of diabetes, chronic kidney disease (CKD), heart failure and transient ischaemic attack (TIA). Within individuals with BD, sex differences were only found for asthma, arthritis, migraine and ischemic heart disease. Women with BD were more likely to report asthma, arthritis and migraine while men with BD were more likely to report ischemic heart disease.

With regards to differences across age groups, we found higher prevalence rates of diabetes, hypertension, arthritis, cerebrovascular accident, ischaemic heart disease, COPD, CKD, Parkinson's disease, heart failure, atrial fibrillation and TIA in individuals in older age ranges, while asthma and migraine were more prevalent in those in younger age ranges (Supplemental Table 3, Supplemental Figure 2). Similar results within individuals with SSD and BD (except for asthma and cerebrovascular accident in BD).

We found differences for ethnicity in individuals with diabetes, hypertension, asthma, arthritis, epilepsy, eczema, ischaemic heart disease, COPD and cerebrovascular accident (Figure 2, Supplemental Tables 4). Individuals from Black or South Asian minorities were more likely to show higher prevalence rates of diabetes and hypertension compared to those White British or Irish. Black Caribbean showed the higher prevalence rates of asthma or eczema among all other groups. Arthritis, COPD, epilepsy and IHD seem to be slightly more prevalent in White British or Irish, with epilepsy showing the highest prevalence rates among Irish. Similar trends were found within SSD and BD subgroups with diabetes rates higher in South Asians with BD (29.7%) compared to South Asians with SSD (20.7%); while diabetes rates in Black Caribbean with SSD

1  
2  
3 (24.4%) were higher than in those with BD (19.6%). With regards to social deprivation, we found  
4 that individuals with diabetes, hypertension, asthma, and COPD were more likely to be higher  
5 levels of deprivation compared to those that did not have these specific conditions (Supplemental  
6  
7  
8  
9  
10 Table 5).

11  
12 PLEASE INSERT FIGURE 2 AROUND HERE

13  
14 *Multimorbidity combinations for the whole cohort and SSD and BD subgroups*

15  
16 Table 3 summarizes the ten most common physical comorbidities in patients with SMI, their  
17 prevalence, the mean number of comorbidities, and the three most frequently associated  
18 comorbidities, for the total cohort and by SMI diagnosis. While there were no clear differences in  
19 the mean number of comorbidities by SMI diagnosis, the presence of one physical condition  
20 predisposed individuals to at least one other condition; the mean number of comorbidities in the  
21 total cohort was 0.74, jumping to at least 2.20 in the presence of one of the ten most common  
22 comorbidities. The three most commonly associated physical comorbidities remained relatively  
23 consistent by SMI diagnosis, with a few exceptions. The prevalence of associated comorbidities  
24 with epilepsy are lower in BD than SSD, a fairly different comorbidity profile in migraine between  
25 SMI diagnoses and a lower rate of diabetes in individuals with comorbid BD and COPD (when  
26 compared to SSD). The most common combination of conditions included diabetes, hypertension  
27 and asthma, regardless of their SMI diagnoses. Most individuals with these combinations of  
28 conditions were also likely to have arthritis. Figures 3, 4 and 5 show the most prevalent conditions  
29 for individuals with SMI and comorbid diabetes, hypertension and asthma, respectively.  
30  
31  
32  
33  
34  
35  
36  
37  
38  
39  
40  
41  
42  
43  
44  
45  
46  
47  
48

49 PLEASE INSERT TABLE 3 AND FIGURES 3,4 AND 5 AROUND HERE

50  
51 *Association with disability*



1  
2  
3 HoNOS descriptive statistics for the whole SMI cohort (Mean=10.40, SD=6.06) and the ten most  
4  
5 common physical comorbidities are shown in Table 4. Regression analyses showed that  
6  
7 individuals with any of these conditions (except migraine) showed higher HoNOS scores, even  
8  
9 after adjustments for age, sex, IMD or SMI diagnoses. We also examined whether simple and  
10  
11 complex multimorbidity was also associated with HoNOS total score and we found that a strong  
12  
13 positive association minimally attenuated after adjustments. Similar socio-demographics and  
14  
15 trends were found within BD and SSD groups (Supplemental Tables 6-8). However, associations  
16  
17 for diabetes, hypertension and ischaemic heart disease were fully attenuated after adjustments in  
18  
19 the SSD group and associations for hypertension were also fully attenuated after adjustments in  
20  
21 the BD group.  
22  
23  
24  
25

26 PLEASE INSERT TABLE 4 AROUND HERE  
27

## 28 **Discussion**

29  
30 The first objective of this study was to design and develop a suitable strategy to extract physical  
31  
32 health conditions which could be easily replicated in future multimorbidity research using mental  
33  
34 health electronic health records. The NLP strategy using MedCAT provided very good  
35  
36 performance estimates for all the conditions extracted, which supports its suitability to extract data  
37  
38 on physical health conditions from mental health clinical notes. These findings are consistent with  
39  
40 previous research which has used MedCAT to extract data from hospital settings.[34,35] This  
41  
42 resource should help to facilitate and promote research on multimorbidity using mental health  
43  
44 records, in general, and has the potential for direct replication in other mental health trusts that  
45  
46 have already deployed CRIS platforms.  
47  
48  
49

50  
51 Our second objective was to examine the prevalence of these conditions in SMI individuals and  
52  
53 compare the most prevalent multimorbidity combinations between individuals with BD and SSD.  
54  
55  
56  
57  
58  
59

1  
2  
3 When we examined differences in socio-demographic variables by diagnosis, our findings were  
4 largely consistent with previous research,[3,36–39] although associations between ethnicity and  
5 BD are less established.[40] With regards to sociodemographic differences, we found that women  
6 with SSD were more likely to have diabetes, CKD, heart failure and TIA compared to men with  
7 SSD; and women with BD were more likely to have asthma, arthritis and migraine compared to  
8 men with BD. Previous research in this population showed mixed results. Some studies found  
9 higher prevalence of hypertension in women with SSD[41] and diabetes in women in BD,[42] and  
10 others did not find relevant sex differences.[43] Our findings suggest that there could be an  
11 increased risk for diabetes and hypertension for females with an SMI diagnosis, especially in SSD.  
12 Further research in this line is needed.  
13  
14

15 Ethnic differences were found for diabetes, hypertension, asthma, arthritis, epilepsy, eczema,  
16 ischaemic heart disease, COPD and cerebrovascular accident. Individuals from Black or South  
17 Asian minorities were more likely to show higher prevalence rates of diabetes and hypertension  
18 compared to White British or Irish. Black Caribbean showed the higher prevalence rates of asthma  
19 or eczema among all other groups. Arthritis, COPD, epilepsy and IHD seem to be slightly more  
20 prevalent in White British or Irish, with epilepsy showing the highest prevalence rates among Irish.  
21 Similar trends were found within SSD and BD subgroups with diabetes rates higher in South  
22 Asians with BD compared to South Asians with SSD, while diabetes rates in Black Caribbean with  
23 SSD were higher than in those with BD. These results largely mirror previous research in  
24 ethnicity.[44–50] When we examined social deprivation, individuals with diabetes, hypertension,  
25 asthma, and COPD were more likely to report the highest levels of deprivation regardless of their  
26 SMI diagnoses. Similar to ethnicity, these results are also consistent with findings in the general  
27  
28  
29  
30  
31  
32  
33  
34  
35  
36  
37  
38  
39  
40  
41  
42  
43  
44  
45  
46  
47  
48  
49  
50  
51  
52  
53  
54  
55  
56  
57  
58  
59  
60

1  
2  
3 population where higher levels of social deprivation are found in those with comorbid  
4 diabetes,[51,52] hypertension,[53] asthma[54] or COPD.[55]  
5

6  
7  
8 Overall, in the whole SMI cohort, around 40% of the individuals had at least one mention of a  
9  
10 physical health condition and close to 20% had two or more physical conditions, which could be  
11  
12 labelled as complex multimorbidity. These findings provide evidence to support previous research  
13  
14 suggestions about the increased probability of multimorbidity in this population.[3,17,56–59]  
15

16  
17 Absolute numbers of physical health conditions were higher in patients with SSD than those with  
18  
19 BD. Although direct comparisons require caution, our findings partially contrast with previous  
20  
21 reports of higher number of physical comorbidities in individuals with BD.[3,38,39,41] Overall,  
22  
23 the top ten most prevalent conditions in our SMI cohort were diabetes, hypertension, asthma,  
24  
25 arthritis, epilepsy, cerebrovascular accident, eczema, migraine, ischaemic heart disease and  
26  
27 COPD; and the most common combination of conditions included diabetes, hypertension and  
28  
29 asthma, regardless of their SMI diagnoses. Moreover, those that had complex multimorbidity were  
30  
31 also more likely to have cardiometabolic comorbidities such as diabetes and hypertension, which  
32  
33 suggests that the cardiometabolic pathway might be one of the key explanatory mechanism  
34  
35 underlying the association between physical multimorbidity and severe mental illness.[60,61]  
36  
37

38  
39 Future research should explore further these potential independent contribution of this pathway  
40  
41 when focusing on individuals with complex multimorbidity. Furthermore, arthritis was the most  
42  
43 frequent subsequent comorbidity for those with diabetes, hypertension and/or asthma, however for  
44  
45 those with SSD and asthma, eczema slightly displaced arthritis in terms of prevalence. These  
46  
47 findings might suggest that potential differences between SSD and BD phenotypes could be linked  
48  
49 to underlying inflammatory pathways. Future research focusing on inflammatory biomarkers  
50  
51 could be key to further our understanding of the potential differences between SSD and BD.  
52  
53  
54  
55  
56  
57  
58  
59

1  
2  
3 In addition, we examined the association between the top ten most prevalent conditions and  
4 disability levels. We found that not only multimorbidity was clearly associated with higher levels  
5 of disability but having any of these specific conditions was associated with higher levels of  
6 disability, even after adjustments for age, sex, deprivation or SMI diagnoses. Similar results were  
7 found when we further examined the associations between multimorbidity and disability within  
8 SSD and BD groups. When we examined the independent association of each physical health  
9 condition and disability within groups, our results suggested that that socio-demographic factors  
10 could have a greater impact in these associations in individuals with SSD. Although our results are  
11 not directly comparable with previous studies, they are in line with findings in previous research  
12 in ageing[62] or some specific SMI populations.[63,64] Further research is needed to understand  
13 the potential shared drivers of disability in individuals with BD and these conditions, in general,  
14 and diabetes and BD, in particular.  
15  
16  
17  
18  
19  
20  
21  
22  
23  
24  
25  
26  
27  
28  
29

30 One of the main strengths of this study is the large comprehensive cohort of people with SMI  
31 drawn from a population with a high ethnic diversity, addressing the neglect of both ethnic  
32 minority groups and SMI in multimorbidity research. This is a key advantage of using EHRs from  
33 a large secondary mental health care provider and having the benefits of a data extraction strategy  
34 for accessing data on physical health conditions from the text fields of clinical notes. MedCAT  
35 development and deployment in CRIS text records will hopefully promote and facilitate future  
36 research in mental healthcare. However, further research is needed to validate this strategy in other  
37 EHRs sources using free text. Although our results are promising and the comparability of the  
38 findings with previous research provides some evidence of validity, further research is also needed  
39 to examine the cross-validity using primary care structured fields data. Furthermore, it is also  
40 important to note that individuals with more severe SMI may have more comprehensive textual  
41  
42  
43  
44  
45  
46  
47  
48  
49  
50  
51  
52  
53  
54  
55  
56  
57  
58  
59  
60

1  
2  
3 data, so that our findings might be less representative of highly functioning individuals with less  
4  
5 severe SMI. In addition, we acknowledge that although the conditions considered are within the  
6  
7 most considered in multimorbidity research, future studies should consider a larger number of  
8  
9 conditions and include rare diseases. It should be noted that our study is one of the first, to our  
10  
11 knowledge, to compare the associations between physical health comorbidities and disability in  
12  
13 this traditionally neglected population and HoNOS is a widely used measure in secondary mental  
14  
15 health services in the UK which provides us a general overview of disability in this population.  
16  
17 However, we acknowledge that further research with more objective measures of disability is also  
18  
19 needed to drive future policy in this population. To sum up, our study provides an overview of the  
20  
21 most prevalent health conditions in SMI and underlines the need for further research into the  
22  
23 origins of multimorbidity in this population, considering in more detail the nature of the SMI both  
24  
25 in terms of severity and in terms of constituent diagnoses and/or symptomatic phenotype, given  
26  
27 the apparent differences between BD and SSD. Our findings highlight multimorbidity as a driver  
28  
29 of disability in this population, which also requires further mechanistic evaluation.  
30  
31  
32  
33  
34  
35  
36  
37  
38  
39  
40  
41  
42  
43  
44  
45  
46  
47  
48  
49  
50  
51  
52  
53  
54  
55  
56  
57  
58  
59  
60

1  
2  
3  
4  
5 **Acknowledgments:** We would like to thank Megan Pritchard and Mathew Broadbent for their  
6 unvaluable contribution and support.  
7

8  
9  
10 **Funding statement:**

11  
12 RB is funded in part by grant MR/R016372/1 for the King's College London MRC Skills  
13 Development Fellowship programme funded by the UK Medical Research Council (MRC) and  
14 by grant IS-BRC-1215-20018 for the National Institute for Health Research (NIHR) Biomedical  
15 Research Centre at South London and Maudsley NHS Foundation Trust and King's College  
16 London. JD is funded by the Health Foundation working together with the Academy of Medical  
17 Sciences, for a Clinician Scientist Fellowship and by the ESRC in relation to the SEP-MD study  
18 [ES/S002715/1] and part supported by the ESRC Centre for Society and Mental Health at King's  
19 College London [ESRC Reference: ES/S012567/1]. DB is funded by a UKRI Innovation  
20 Fellowship as part of Health Data Research UK MR/S00310X/. AM is funded by Takeda  
21 California, Inc. RD, RS, AR are part-funded by the National Institute for Health Research  
22 (NIHR) Biomedical Research Centre at South London and Maudsley NHS Foundation Trust and  
23 King's College London. RD's work is supported by 1. National Institute for Health Research  
24 (NIHR) Biomedical Research Centre at South London and Maudsley NHS Foundation Trust and  
25 King's College London. 2. Health Data Research UK, which is funded by the UK Medical  
26 Research Council, Engineering and Physical Sciences Research Council, Economic and Social  
27 Research Council, Department of Health and Social Care (England), Chief Scientist Office of the  
28 Scottish Government Health and Social Care Directorates, Health and Social Care Research and  
29 Development Division (Welsh Government), Public Health Agency (Northern Ireland), British  
30 Heart Foundation and Wellcome Trust. 3. The National Institute for Health Research University  
31  
32  
33  
34  
35  
36  
37  
38  
39  
40  
41  
42  
43  
44  
45  
46  
47  
48  
49  
50  
51  
52  
53  
54  
55  
56  
57  
58  
59  
60

1  
2  
3 College London Hospitals Biomedical Research Centre. This paper represents independent  
4  
5 research funded by the National Institute for Health Research (NIHR) Biomedical Research  
6  
7 Centre at South London and Maudsley NHS Foundation Trust and King's College London and  
8  
9 by the Health Foundation. The views expressed are those of the author(s) and not necessarily  
10  
11 those of the NHS, the NIHR, the Department of Health, the MRC, ESRC or King's College  
12  
13 London.  
14  
15

16  
17 **Authors contributions:** RB conceived and designed the study. ZK, RB and RS designed,  
18  
19 validated the data extraction strategy. ZK, TS and AM developed the natural language processing  
20  
21 algorithm and interface for the annotations. RB, ZK, JC, LM, NC, TS, AM, NS and TW were  
22  
23 annotators. RB, ZK, SS, LL, JC, SA and DB performed the data analyses and interpreted the  
24  
25 results. RS and JD provided clinically relevant input over all the stages. RB, ZK and SS drafted  
26  
27 the first version of the manuscript and all authors critically reviewed the manuscript and  
28  
29 contributed to writing the final version.  
30  
31

32  
33 **Data sharing statement:** Due to the confidential nature of free-text data, we are unable to make  
34  
35 patient-level data available. This project was approved by the CRIS Oversight Committee which  
36  
37 is responsible for ensuring all research applications comply with ethical and legal guidelines. The  
38  
39 CRIS system enables access to anonymised electronic patient records for secondary analysis from  
40  
41 SLaM and has full ethical approvals. CRIS was developed with extensive involvement from  
42  
43 service users and adheres to strict governance frameworks managed by service users. It has passed  
44  
45 a robust ethics approval process acutely attentive to the use of patient data. Specifically, this  
46  
47 system was approved as a dataset for secondary data analysis on this basis by Oxfordshire Research  
48  
49 Ethics Committee C (08/H06060/71). The data is de-identified and used in a data-secure format  
50  
51  
52  
53  
54  
55  
56  
57  
58  
59  
60

1  
2  
3 and all patients have the choice to opt-out of their anonymized data being used. Approval for  
4 data access can only be provided from the CRIS Oversight Committee at SLAM.  
5  
6

7 **Competing interest statements:** No competing interests.  
8  
9

## 10 11 12 **References** 13

- 14 1 Firth J, Rosenbaum S, Galletly C, *et al*. Protecting physical health in people with mental  
15 illness – Authors’ reply. *Lancet Psychiatry* 2019;**6**:890–1. doi:10.1016/S2215-  
16 0366(19)30387-6  
17  
18
- 19 2 Lawrence D, Kisely S, Pais J. The Epidemiology of Excess Mortality in People with Mental  
20 Illness. *Can J Psychiatry* 2010;**55**:752–60. doi:10.1177/070674371005501202  
21  
22
- 23 3 Reilly S, Olier I, Planner C, *et al*. Inequalities in physical comorbidity: a longitudinal  
24 comparative cohort study of people with severe mental illness in the UK. *BMJ Open*  
25 2015;**5**:e009010. doi:10.1136/bmjopen-2015-009010  
26  
27
- 28 4 Woodhead C, Ashworth M, Schofield P, *et al*. Patterns of physical co-/multi-morbidity  
29 among patients with serious mental illness: a London borough-based cross-sectional study.  
30 *BMC Fam Pract* 2014;**15**:117. doi:10.1186/1471-2296-15-117  
31  
32
- 33 5 Filipcic IŠ, Bajic Ž, Filipcic I. The onset and accumulation of physical multimorbidity in  
34 severe and common mental disorders. *Curr Opin Psychiatry* 2020;**33**:484–90.  
35 doi:10.1097/YCO.0000000000000635  
36  
37
- 38 6 Cheung KL, ten Klooster PM, Smit C, *et al*. The impact of non-response bias due to  
39 sampling in public health studies: A comparison of voluntary versus mandatory recruitment  
40 in a Dutch national survey on adolescent health. *BMC Public Health* 2017;**17**.  
41  
42  
43  
44  
45  
46  
47  
48  
49  
50  
51  
52  
53  
54  
55  
56  
57  
58  
59  
60



- 1  
2  
3 7 Correll CU, Detraux J, Lepeleire JD, *et al.* Effects of antipsychotics, antidepressants and  
4 mood stabilizers on risk for physical diseases in people with schizophrenia, depression and  
5 bipolar disorder. *World Psychiatry* 2015;**14**:119–36. doi:<https://doi.org/10.1002/wps.20204>  
6  
7  
8  
9  
10 8 Correll CU, Solmi M, Veronese N, *et al.* Prevalence, incidence and mortality from  
11 cardiovascular disease in patients with pooled and specific severe mental illness: a large-  
12 scale meta-analysis of 3,211,768 patients and 113,383,368 controls. *World Psychiatry*  
13 2017;**16**:163–80. doi:<https://doi.org/10.1002/wps.20420>  
14  
15  
16  
17  
18  
19 9 DE HERT M, CORRELL CU, BOBES J, *et al.* Physical illness in patients with severe  
20 mental disorders. I. Prevalence, impact of medications and disparities in health care. *World*  
21 *Psychiatry* 2011;**10**:52–77.  
22  
23  
24  
25  
26 10 Fan Z, Wu Y, Shen J, *et al.* Schizophrenia and the risk of cardiovascular diseases: A meta-  
27 analysis of thirteen cohort studies. *J Psychiatr Res* 2013;**47**:1549–56.  
28  
29  
30  
31  
32  
33 11 Pouget JG, Schizophrenia Working Group of the Psychiatric Genomics Consortium, Han B,  
34 *et al.* Cross-disorder analysis of schizophrenia and 19 immune-mediated diseases identifies  
35 shared genetic risk. *Hum Mol Genet* 2019;**28**:3498–513. doi:[10.1093/hmg/ddz145](https://doi.org/10.1093/hmg/ddz145)  
36  
37  
38  
39  
40 12 Rosenblat JD, McIntyre RS. Are medical comorbid conditions of bipolar disorder due to  
41 immune dysfunction? *Acta Psychiatr Scand* 2015;**132**:180–91.  
42  
43  
44  
45  
46  
47 13 Tylee DS, Sun J, Hess JL, *et al.* Genetic correlations among psychiatric and immune-related  
48 phenotypes based on genome-wide association data. *Am J Med Genet B Neuropsychiatr*  
49 *Genet* 2018;**177**:641–57. doi:<https://doi.org/10.1002/ajmg.b.32652>  
50  
51  
52  
53  
54  
55  
56  
57  
58  
59  
60

- 1  
2  
3 14 Leo RJ, Singh J. Migraine headache and bipolar disorder comorbidity: A systematic review  
4 of the literature and clinical implications. *Scand J Pain* 2016;**11**:136–45.  
5  
6 doi:10.1016/j.sjpain.2015.12.002  
7  
8  
9  
10 15 McKay KA, Tremlett H, Fisk JD, *et al*. Psychiatric comorbidity is associated with disability  
11 progression in multiple sclerosis. *Neurology* 2018;**90**:e1316–23.  
12  
13 doi:10.1212/WNL.0000000000005302  
14  
15  
16  
17 16 Dorrington S, Carr E, Stevelink SAM, *et al*. Multimorbidity and fit note receipt in working-  
18 age adults with long-term health conditions. *Psychol Med* undefined/ed;:1–10.  
19  
20 doi:10.1017/S0033291720002937  
21  
22  
23  
24 17 Kugathasan P, Wu H, Gaughran F, *et al*. Association of physical health multimorbidity with  
25 mortality in people with schizophrenia spectrum disorders: Using a novel semantic search  
26 system that captures physical diseases in electronic patient records. *Schizophr Res*  
27  
28 2020;**216**:408–15. doi:10.1016/j.schres.2019.10.061  
29  
30  
31  
32  
33 18 Barnett K, Mercer SW, Norbury M, *et al*. Epidemiology of multimorbidity and implications  
34 for health care, research, and medical education: a cross-sectional study. *The Lancet*  
35  
36 2012;**380**:37–43. doi:10.1016/S0140-6736(12)60240-2  
37  
38  
39  
40 19 Cassell A, Edwards D, Harshfield A, *et al*. The epidemiology of multimorbidity in primary  
41 care: a retrospective cohort study. *Br J Gen Pract* 2018;**68**:e245–51.  
42  
43 doi:10.3399/bjgp18X695465  
44  
45  
46  
47 20 Kuan V, Denaxas S, Gonzalez-Izquierdo A, *et al*. A chronological map of 308 physical and  
48 mental health conditions from 4 million individuals in the English National Health Service.  
49  
50 *Lancet Digit Health* 2019;**1**:e63–77. doi:10.1016/S2589-7500(19)30012-3  
51  
52  
53  
54  
55  
56  
57  
58  
59  
60

- 1  
2  
3 21 Altamura AC, Buoli M, Pozzoli S. Role of immunological factors in the pathophysiology  
4 and diagnosis of bipolar disorder: Comparison with schizophrenia. *Psychiatry Clin Neurosci*  
5 2014;**68**:21–36. doi:<https://doi.org/10.1111/pcn.12089>  
6  
7  
8  
9  
10 22 Sahu A, Chowdhury HA, Gaikwad M, *et al.* Integrative network analysis identifies  
11 differential regulation of neuroimmune system in Schizophrenia and Bipolar disorder. *Brain*  
12 *Behav Immun - Health* 2020;**2**:100023. doi:10.1016/j.bbih.2019.100023  
13  
14  
15  
16  
17 23 Walker J, Curtis V, Shaw P, *et al.* Schizophrenia and bipolar disorder are distinguished  
18 mainly by differences in neurodevelopment. *Neurotox Res* 2002;**4**:427.  
19  
20  
21  
22  
23  
24 24 WHO | The world health report 2001 - Mental Health: New Understanding, New Hope.  
25  
26  
27  
28  
29 25 Prediction of disability in schizophrenia: Symptoms, cognition, and self-assessment - Philip  
30  
31  
32  
33  
34  
35  
36 26 Sanchez-Moreno J, Martinez-Aran A, Tabarés-Seisdedos R, *et al.* Functioning and Disability  
37 in Bipolar Disorder: An Extensive Review. *Psychother Psychosom* 2009;**78**:285–97.  
38  
39  
40  
41  
42  
43 27 Stewart R, Soremekun M, Perera G, *et al.* The South London and Maudsley NHS Foundation  
44  
45  
46  
47  
48  
49 28 ICD-10 Version:2016. <https://icd.who.int/browse10/2016/en> (accessed 9 Jun 2021).  
50  
51  
52  
53  
54  
55  
56  
57  
58  
59  
60

- 1  
2  
3 29 Kraljevic Z, Searle T, Shek A, *et al.* Multi-domain Clinical Natural Language Processing  
4 with MedCAT: the Medical Concept Annotation Toolkit. *ArXiv201001165 Cs* Published  
5 Online First: 25 March 2021. <http://arxiv.org/abs/2010.01165> (accessed 4 Jun 2021).  
6  
7  
8  
9  
10 30 Searle T, Kraljevic Z, Bendayan R, *et al.* MedCATTrainer: A Biomedical Free Text  
11 Annotation Interface with Active Learning and Research Use Case Specific Customisation.  
12 *ArXiv190707322 Cs* Published Online First: 16 July 2019. <http://arxiv.org/abs/1907.07322>  
13 (accessed 19 Aug 2020).  
14  
15  
16  
17  
18  
19 31 English indices of deprivation 2019: technical report. GOV.UK.  
20 [https://www.gov.uk/government/publications/english-indices-of-deprivation-2019-technical-](https://www.gov.uk/government/publications/english-indices-of-deprivation-2019-technical-report)  
21 report (accessed 4 Jun 2021).  
22  
23  
24  
25  
26 32 Wing JK, Beevor AS, Curtis RH, *et al.* Health of the Nation Outcome Scales (HoNOS):  
27 Research and development. *Br J Psychiatry* 1998;**172**:11–8. doi:10.1192/bjp.172.1.11  
28  
29  
30 33 Jewell A, Pritchard M, Barrett K, *et al.* The Maudsley Biomedical Research Centre (BRC)  
31 data linkage service user and carer advisory group: creating and sustaining a successful  
32 patient and public involvement group to guide research in a complex area. *Res Involv*  
33 *Engagem* 2019;**5**:20. doi:10.1186/s40900-019-0152-4  
34  
35  
36  
37  
38  
39 40 34 Bean DM, Kraljevic Z, Searle T, *et al.* Angiotensin-converting enzyme inhibitors and  
41 angiotensin II receptor blockers are not associated with severe COVID-19 infection in a  
42 multi-site UK acute hospital trust. *Eur J Heart Fail* 2020;**22**:967–74.  
43  
44  
45  
46  
47  
48  
49 50 35 Carr E, Bendayan R, Bean D, *et al.* Evaluation and improvement of the National Early  
51 Warning Score (NEWS2) for COVID-19: a multi-hospital study. *BMC Med* 2021;**19**:23.  
52  
53  
54  
55  
56  
57  
58  
59  
60

- 1  
2  
3 36 Birgenheir DG, Ilgen MA, Bohnert ASB, *et al.* Pain conditions among veterans with  
4 schizophrenia or bipolar disorder. *Gen Hosp Psychiatry* 2013;**35**:480–4.  
5  
6 doi:10.1016/j.genhosppsy.2013.03.019  
7  
8  
9  
10 37 Haroon S, Hayes JF, Blackburn R, *et al.* Recording of Severe Mental Illness in United  
11 Kingdom Primary Care, 2000–2010. *PLOS ONE* 2013;**8**:e82365.  
12  
13 doi:10.1371/journal.pone.0082365  
14  
15  
16 38 Smith DJ, Langan J, McLean G, *et al.* Schizophrenia is associated with excess multiple  
17 physical-health comorbidities but low levels of recorded cardiovascular disease in primary  
18 care: cross-sectional study. *BMJ Open* 2013;**3**:e002808. doi:10.1136/bmjopen-2013-002808  
19  
20  
21  
22 39 Smith DJ, Martin D, McLean G, *et al.* Multimorbidity in bipolar disorder and undertreatment  
23 of cardiovascular disease: a cross sectional study. *BMC Med* 2013;**11**:263.  
24  
25  
26  
27  
28  
29  
30  
31 40 Halvorsrud K, Nazroo J, Otis M, *et al.* Ethnic inequalities in the incidence of diagnosis of  
32 severe mental illness in England: a systematic review and new meta-analyses for non-  
33 affective and affective psychoses. *Soc Psychiatry Psychiatr Epidemiol* 2019;**54**:1311–23.  
34  
35  
36  
37  
38  
39  
40  
41 41 Oreški I, Jakovljević M, Aukst-Margetić B, *et al.* Comorbidity and multimorbidity in  
42 patients with schizophrenia and bipolar disorder: similarities and differences. *Psychiatr*  
43  
44  
45  
46  
47 42 Patel RS, Virani S, Saeed H, *et al.* Gender Differences and Comorbidities in U.S. Adults  
48 with Bipolar Disorder. *Brain Sci* 2018;**8**:168. doi:10.3390/brainsci8090168  
49  
50  
51  
52 43 Severe mental illness (SMI) and physical health inequalities: briefing. GOV.UK.  
53  
54  
55  
56  
57  
58  
59  
60

- 1  
2  
3 inequalities/severe-mental-illness-and-physical-health-inequalities-briefing (accessed 4 Jun  
4  
5 2021).
- 6  
7  
8 44 Das-Munshi J, Ashworth M, Dewey ME, *et al*. Type 2 diabetes mellitus in people with  
9  
10 severe mental illness: inequalities by ethnicity and age. Cross-sectional analysis of 588 408  
11 records from the UK. *Diabet Med* 2017;**34**:916–24. doi:<https://doi.org/10.1111/dme.13298>  
12  
13
- 14 45 Gaughran F, Stahl D, Stringer D, *et al*. Effect of lifestyle, medication and ethnicity on  
15  
16 cardiometabolic risk in the year following the first episode of psychosis: prospective cohort  
17 study. *Br J Psychiatry* 2019;**215**:712–9. doi:10.1192/bjp.2019.159  
18  
19
- 20 46 Lusignan S de, Alexander H, Broderick C, *et al*. The epidemiology of eczema in children and  
21  
22 adults in England: A population-based study using primary care data. *Clin Exp Allergy*  
23  
24 2021;**51**:471–82. doi:<https://doi.org/10.1111/cea.13784>  
25  
26
- 27 47 Gilkes A, Ashworth M, Schofield P, *et al*. Does COPD risk vary by ethnicity? A  
28  
29 retrospective cross-sectional study. *Int J Chron Obstruct Pulmon Dis* 2016;**11**:739–46.  
30  
31 doi:10.2147/COPD.S96391  
32  
33
- 34 48 Godsland IF, Johnston DG, Chaturvedi N. Mechanisms of Disease: lessons from ethnicity in  
35  
36 the role of triglyceride metabolism in ischemic heart disease. *Nat Clin Pract Endocrinol*  
37  
38 *Metab* 2007;**3**:530–8. doi:10.1038/ncpendmet0530  
39  
40
- 41 49 Health Survey for England - 2004: Health of ethnic minorities, Headline results. NHS Digit.  
42  
43 [https://digital.nhs.uk/data-and-information/publications/statistical/health-survey-for-](https://digital.nhs.uk/data-and-information/publications/statistical/health-survey-for-england/health-survey-for-england-2004-health-of-ethnic-minorities-headline-results)  
44  
45 [england/health-survey-for-england-2004-health-of-ethnic-minorities-headline-results](https://digital.nhs.uk/data-and-information/publications/statistical/health-survey-for-england/health-survey-for-england-2004-health-of-ethnic-minorities-headline-results)  
46  
47  
48 (accessed 4 Jun 2021).  
49  
50
- 51 50 Public Health Profiles - PHE. <https://fingertips.phe.org.uk/> (accessed 4 Jun 2021).  
52  
53  
54  
55  
56  
57  
58  
59  
60

- 1  
2  
3 51 Zghebi SS, Steinke DT, Carr MJ, *et al.* Examining trends in type 2 diabetes incidence,  
4 prevalence and mortality in the UK between 2004 and 2014. *Diabetes Obes Metab*  
5 2017;**19**:1537–45. doi:<https://doi.org/10.1111/dom.12964>  
6  
7  
8  
9  
10 52 Diabetes Prevention Programme, 2017-18 Diagnoses and Demographics. NHS Digit.  
11 [https://digital.nhs.uk/data-and-information/publications/statistical/national-diabetes-](https://digital.nhs.uk/data-and-information/publications/statistical/national-diabetes-audit/diabetes-prevention-programme-2017-18)  
12 [audit/diabetes-prevention-programme-2017-18](https://digital.nhs.uk/data-and-information/publications/statistical/national-diabetes-audit/diabetes-prevention-programme-2017-18) (accessed 4 Jun 2021).  
13  
14  
15  
16  
17 53 Leng B, Jin Y, Li G, *et al.* Socioeconomic status and hypertension: a meta-analysis. *J*  
18 *Hypertens* 2015;**33**:221–9. doi:10.1097/HJH.0000000000000428  
19  
20  
21 54 Gupta RP, Mukherjee M, Sheikh A, *et al.* Persistent variations in national asthma mortality,  
22 hospital admissions and prevalence by socioeconomic status and region in England. *Thorax*  
23 2018;**73**:706–12. doi:10.1136/thoraxjnl-2017-210714  
24  
25  
26  
27  
28 55 Simpson CR, Hippisley-Cox J, Sheikh A. Trends in the epidemiology of chronic obstructive  
29 pulmonary disease in England: a national study of 51 804 patients. *Br J Gen Pract*  
30 2010;**60**:e277–84. doi:10.3399/bjgp10X514729  
31  
32  
33  
34  
35 56 Carney CP, Jones L, Woolson RF. Medical comorbidity in women and men with  
36 schizophrenia. *J Gen Intern Med* 2006;**21**:1133–7. doi:10.1111/j.1525-1497.2006.00563.x  
37  
38  
39  
40 57 Gabilondo A, Alonso-Moran E, Nuño-Solinis R, *et al.* Comorbidities with chronic physical  
41 conditions and gender profiles of illness in schizophrenia. Results from PREST, a new health  
42 dataset. *J Psychosom Res* 2017;**93**:102–9. doi:10.1016/j.jpsychores.2016.12.011  
43  
44  
45  
46  
47 58 Kugathasan P, Stubbs B, Aagaard J, *et al.* Increased mortality from somatic multimorbidity  
48 in patients with schizophrenia: a Danish nationwide cohort study. *Acta Psychiatr Scand*  
49 2019;**140**:340–8. doi:10.1111/acps.13076  
50  
51  
52  
53  
54  
55  
56  
57  
58  
59  
60

- 1  
2  
3 59 Severe mental illness (SMI) and physical health inequalities: briefing. GOV.UK.  
4  
5 [https://www.gov.uk/government/publications/severe-mental-illness-smi-physical-health-](https://www.gov.uk/government/publications/severe-mental-illness-smi-physical-health-inequalities/severe-mental-illness-and-physical-health-inequalities-briefing)  
6 [inequalities/severe-mental-illness-and-physical-health-inequalities-briefing](https://www.gov.uk/government/publications/severe-mental-illness-smi-physical-health-inequalities/severe-mental-illness-and-physical-health-inequalities-briefing) (accessed 3 Mar  
7  
8 2020).  
9  
10  
11  
12 60 Firth J, Siddiqi N, Koyanagi A, *et al*. The Lancet Psychiatry Commission: a blueprint for  
13  
14 protecting physical health in people with mental illness. *Lancet Psychiatry* 2019;**6**:675–712.  
15  
16 doi:10.1016/S2215-0366(19)30132-4  
17  
18  
19 61 Henderson DC, Vincenzi B, Andrea NV, *et al*. Pathophysiological mechanisms of increased  
20  
21 cardiometabolic risk in people with schizophrenia and other severe mental illnesses. *Lancet*  
22  
23 *Psychiatry* 2015;**2**:452–64. doi:10.1016/S2215-0366(15)00115-7  
24  
25  
26 62 Quiñones AR, Markwardt S, Botosaneanu A. Multimorbidity Combinations and Disability in  
27  
28 Older Adults. *J Gerontol A Biol Sci Med Sci* 2016;**71**:823–30. doi:10.1093/gerona/glw035  
29  
30  
31 63 Desalegn D, Girma S, Abdeta T. Quality of life and its association with current substance  
32  
33 use, medication non-adherence and clinical factors of people with schizophrenia in  
34  
35 Southwest Ethiopia: a hospital-based cross-sectional study. *Health Qual Life Outcomes*  
36  
37 2020;**18**. doi:10.1186/s12955-020-01340-0  
38  
39  
40 64 McIntyre RS, Konarski JZ, Soczynska JK, *et al*. Medical Comorbidity in Bipolar Disorder:  
41  
42 Implications for Functional Outcomes and Health Service Utilization. *Psychiatr Serv*  
43  
44 2006;**57**:1140–4. doi:10.1176/ps.2006.57.8.1140  
45  
46  
47  
48  
49  
50  
51  
52  
53  
54  
55  
56  
57  
58  
59  
60



Table 1. MedCAT performance F1, precision and recall estimates for each physical health conditions.

| <b>Physical Health Condition</b>         | <b>F1</b> | <b>Precision</b> | <b>Recall</b> |
|------------------------------------------|-----------|------------------|---------------|
| Diabetes mellitus                        | 0.98      | 0.99             | 0.98          |
| Heart failure                            | 0.97      | 0.97             | 0.96          |
| Ischemic heart disease                   | 0.98      | 0.97             | 0.99          |
| Hypertensive disorder, systemic arterial | 0.97      | 0.97             | 0.96          |
| Chronic obstructive lung disease         | 0.94      | 0.97             | 0.92          |
| Asthma                                   | 1.00      | 1.00             | 1.00          |
| Chronic kidney disease                   | 1.00      | 1.00             | 0.99          |
| Cerebrovascular accident                 | 0.96      | 0.94             | 0.98          |
| Transient ischemic attack                | 0.91      | 0.82             | 1.00          |
| Parkinson's disease                      | 0.94      | 0.88             | 1.00          |
| Multiple sclerosis                       | 1.00      | 1.00             | 1.00          |
| Epilepsy                                 | 0.93      | 1.00             | 0.85          |
| Migraine                                 | 1.00      | 1.00             | 1.00          |
| Atrial fibrillation                      | 0.98      | 1.00             | 0.96          |
| Chronic sinusitis                        | 0.98      | 0.97             | 1.00          |
| Inflammatory bowel disease               | 0.96      | 1.00             | 0.92          |
| Chronic liver disease                    | 1.00      | 1.00             | 1.00          |
| Psoriasis                                | 1.00      | 1.00             | 1.00          |
| Eczema                                   | 0.94      | 1.00             | 0.88          |
| Arthritis                                | 1.00      | 1.00             | 1.00          |

Table 2. Socio-demographic characteristics and prevalence for physical health conditions for total cohort (N=17500) and by SMI diagnosis.

|                                         | <b>Total</b> | <b>SSD</b>   | <b>BD</b>   |
|-----------------------------------------|--------------|--------------|-------------|
| <b>N (%)</b>                            | 17500        | 13019 (74.4) | 4481 (25.6) |
| <b>Sex***</b>                           |              |              |             |
| Female                                  | 8123 (46.4)  | 5421 (41.6)  | 2702 (60.3) |
| Male                                    | 9374 (53.6)  | 7596 (58.3)  | 1778 (39.7) |
| <b>Age at first SMI diagnosis***</b>    |              |              |             |
| 15 – 34                                 | 7497 (42.8)  | 5607 (43.1)  | 1890 (42.2) |
| 35 – 44                                 | 3736 (21.3)  | 2792 (21.4)  | 944 (21.1)  |
| 45 – 54                                 | 2783 (15.9)  | 2057 (15.8)  | 726 (16.2)  |
| 55 – 64                                 | 1525 (8.7)   | 1067 (8.2)   | 458 (10.2)  |
| 65+                                     | 1959 (11.2)  | 1496 (11.5)  | 463 (10.3)  |
| <b>Ethnicity***</b>                     |              |              |             |
| White British                           | 6243 (35.7)  | 4008 (30.8)  | 2235 (49.9) |
| Black Caribbean                         | 3182 (18.2)  | 2799 (21.5)  | 383 (8.5)   |
| Black African                           | 2094 (12.0)  | 1886 (14.5)  | 208 (4.6)   |
| South Asian                             | 549 (3.1)    | 421 (3.2)    | 128 (2.9)   |
| Irish                                   | 346 (2.0)    | 240 (1.8)    | 106 (2.4)   |
| Other                                   | 3846 (22.0)  | 2822 (21.7)  | 1024 (22.9) |
| Not stated                              | 1240 (7.1)   | 843 (6.5)    | 397 (8.9)   |
| <b>Index of multiple deprivation***</b> |              |              |             |
| 1 (less deprived)                       | 742 (4.2)    | 412 (3.2)    | 330 (7.4)   |
| 2                                       | 1384 (7.9)   | 887 (6.8)    | 497 (11.1)  |
| 3                                       | 3575 (20.4)  | 2503 (19.2)  | 1072 (23.9) |
| 4                                       | 7073 (40.4)  | 5476 (42.1)  | 1597 (35.6) |
| 5 (more deprived)                       | 4033 (23.0)  | 3204 (24.6)  | 829 (18.5)  |
| Unknown                                 | 693 (4.0)    | 537 (4.1)    | 156 (3.5)   |
| <b>Number of conditions***</b>          |              |              |             |
| No mentions                             | 10468 (59.8) | 7540 (57.9)  | 2928 (65.3) |
| One                                     | 3733 (21.3)  | 2888 (22.2)  | 845 (18.9)  |
| Two                                     | 1795 (10.3)  | 1429 (11.0)  | 366 (8.2)   |
| Three or more                           | 1504 (8.6)   | 1162 (8.9)   | 342 (7.6)   |
| <b>Physical conditions***</b>           |              |              |             |
| Diabetes***                             | 2686 (15.3)  | 2208 (17.0)  | 478 (10.7)  |
| Hypertension***                         | 2537 (14.5)  | 2070 (15.9)  | 467 (10.4)  |
| Asthma                                  | 1722 (9.8)   | 1291 (9.9)   | 431 (9.6)   |
| Arthritis                               | 954 (5.5)    | 702 (5.4)    | 252 (5.6)   |
| Epilepsy***                             | 799 (4.6)    | 652 (5.0)    | 147 (3.3)   |
| Cerebrovascular accident                | 728 (4.2)    | 573 (4.4)    | 155 (3.5)   |
| Eczema                                  | 616 (3.5)    | 479 (3.7)    | 137 (3.1)   |

|    |                               |           |           |           |
|----|-------------------------------|-----------|-----------|-----------|
| 1  |                               |           |           |           |
| 2  |                               |           |           |           |
| 3  | Migraine***                   | 564 (3.2) | 372 (2.9) | 192 (4.3) |
| 4  | Ischemic heart disease        | 561 (3.2) | 435 (3.3) | 126 (2.8) |
| 5  | Chronic Obstructive Pulmonary |           |           |           |
| 6  | disease                       | 476 (2.7) | 342 (2.6) | 134 (3.0) |
| 7  |                               |           |           |           |
| 8  | Chronic kidney disease*       | 279 (1.6) | 179 (1.4) | 100 (2.2) |
| 9  | Parkinson's disease           | 266 (1.5) | 201 (1.5) | 65 (1.5)  |
| 10 | Heart failure**               | 222 (1.3) | 187 (1.4) | 35 (0.8)  |
| 11 | Psoriasis                     | 179 (1.0) | 129 (1.0) | 50 (1.1)  |
| 12 | Atrial fibrillation           | 133 (0.8) | 100 (0.8) | 33 (0.7)  |
| 13 | Transient Ischaemic Attack    | 130 (0.7) | 91 (0.7)  | 39 (0.9)  |
| 14 | Inflammatory Bowel Disease    | 40 (0.2)  | 25 (0.2)  | 15 (0.3)  |
| 15 | Multiple sclerosis            | 32 (0.2)  | 19 (0.1)  | 13 (0.3)  |
| 16 | Chronic liver disease         | 22 (0.1)  | 20 (0.2)  | 2 (0.0)   |
| 17 | Chronic sinusitis             | 6 (0.0)   | 6 (0.0)   | 0 (0.0)   |
| 18 |                               |           |           |           |

19 Note. \*\*\* p < .001; \*\* p < .01; \* p < .05 for comparisons between BD and SSD groups

20  
21  
22  
23  
24  
25  
26  
27  
28  
29  
30  
31  
32  
33  
34  
35  
36  
37  
38  
39  
40  
41  
42  
43  
44  
45  
46  
47  
48  
49  
50  
51  
52  
53  
54  
55  
56  
57  
58  
59  
60

peer review only

Table 3. Ten most prevalent conditions and associated comorbidities of the total cohort and by SMI diagnosis.

| Condition                      | Prevalence   | Mean # of comorbidities | Three most frequent associated comorbidities |                     |                      |                      |
|--------------------------------|--------------|-------------------------|----------------------------------------------|---------------------|----------------------|----------------------|
|                                | <i>Total</i> | -                       | 0.74                                         | 1. Diabetes (15.3%) | 2. HTN (14.5%)       | 3. Asthma (9.8%)     |
|                                | <i>SSD</i>   | -                       | 0.77                                         | 1. Diabetes (17.0%) | 2. HTN (15.9%)       | 3. Asthma (9.9%)     |
|                                | <i>BD</i>    | -                       | 0.64                                         | 1. Diabetes (10.7%) | 2. HTN (10.4%)       | 3. Asthma (9.6%)     |
| <b>Diabetes</b>                | <i>Total</i> | 15.3%                   | 2.35                                         | 1. HTN (42.1%)      | 2. Asthma (16.9%)    | 3. Arthritis (13.2%) |
|                                | <i>SSD</i>   | 17.0%                   | 2.33                                         | 1. HTN (42.9%)      | 2. Asthma (16.3%)    | 3. Arthritis (12.7%) |
|                                | <i>BD</i>    | 10.7%                   | 2.45                                         | 1. HTN (38.3%)      | 2. Asthma (19.5%)    | 3. Arthritis (15.5%) |
| <b>Hypertension</b>            | <i>Total</i> | 14.5%                   | 2.50                                         | 1. Diabetes (44.5%) | 2. Asthma (16.3%)    | 3. Arthritis (15.2%) |
|                                | <i>SSD</i>   | 15.9%                   | 2.47                                         | 1. Diabetes (45.7%) | 2. Asthma (16.1%)    | 3. Arthritis (14.7%) |
|                                | <i>BD</i>    | 10.4%                   | 2.62                                         | 1. Diabetes (39.2%) | 2. Arthritis (17.3%) | 3. Asthma (17.1%)    |
| <b>Asthma</b>                  | <i>Total</i> | 9.8%                    | 2.27                                         | 1. Diabetes (26.3%) | 2. HTN (24.0%)       | 3. Arthritis (11.9%) |
|                                | <i>SSD</i>   | 9.9%                    | 2.27                                         | 1. Diabetes (27.9%) | 2. HTN (25.9%)       | 3. Eczema (11.2%)    |
|                                | <i>BD</i>    | 9.6%                    | 2.29                                         | 1. Diabetes (21.6%) | 2. HTN (18.6%)       | 3. Arthritis (15.1%) |
| <b>Arthritis</b>               | <i>Total</i> | 5.5%                    | 2.78                                         | 1. HTN (40.5%)      | 2. Diabetes (37.1%)  | 3. Asthma (21.5%)    |
|                                | <i>SSD</i>   | 5.4%                    | 2.78                                         | 1. HTN (43.4%)      | 2. Diabetes (39.9%)  | 3. Asthma (19.9%)    |
|                                | <i>BD</i>    | 5.6%                    | 2.80                                         | 1. HTN (32.1%)      | 2. Diabetes (29.4%)  | 3. Asthma (25.8%)    |
| <b>Epilepsy</b>                | <i>Total</i> | 4.6%                    | 2.40                                         | 1. HTN (25.5%)      | 2. Diabetes (24.8%)  | 3. Asthma (21.4%)    |
|                                | <i>SSD</i>   | 5.0%                    | 2.42                                         | 1. HTN (27.3%)      | 2. Diabetes (26.4%)  | 3. Asthma (21.8%)    |
|                                | <i>BD</i>    | 3.3%                    | 2.31                                         | 1. Asthma (19.7%)   | 2. Diabetes (17.7%)  | 2. HTN (17.7%)       |
| <b>CVA</b>                     | <i>Total</i> | 4.2%                    | 2.89                                         | 1. HTN (42.3%)      | 2. Diabetes (38.6%)  | 3. Asthma (15.4%)    |
|                                | <i>SSD</i>   | 4.4%                    | 2.83                                         | 1. HTN (42.8%)      | 2. Diabetes (38.9%)  | 3. Asthma (14.0%)    |
|                                | <i>BD</i>    | 3.5%                    | 3.09                                         | 1. HTN (40.6%)      | 2. Diabetes (37.4%)  | 3. Asthma (21.9%)    |
| <b>Eczema</b>                  | <i>Total</i> | 3.5%                    | 2.50                                         | 1. Asthma (32.5%)   | 2. Diabetes (26.9%)  | 3. HTN (23.1%)       |
|                                | <i>SSD</i>   | 3.7%                    | 2.45                                         | 1. Asthma (30.3%)   | 2. Diabetes (28.4%)  | 3. HTN (22.5%)       |
|                                | <i>BD</i>    | 3.1%                    | 2.64                                         | 1. Asthma (40.1%)   | 2. HTN (24.8%)       | 3. Diabetes (21.9%)  |
| <b>Migraine</b>                | <i>Total</i> | 3.2%                    | 2.20                                         | 1. Asthma (23.6%)   | 2. Diabetes (20.0%)  | 3. HTN (18.4%)       |
|                                | <i>SSD</i>   | 2.9%                    | 2.23                                         | 1. Diabetes (23.4%) | 2. Asthma (21.5%)    | 3. HTN (20.2%)       |
|                                | <i>BD</i>    | 4.3%                    | 2.15                                         | 1. Asthma (27.6%)   | 2. HTN (15.1%)       | 3. Arthritis (14.1%) |
| <b>Ischaemic heart disease</b> | <i>Total</i> | 3.2%                    | 3.27                                         | 1. HTN (49.0%)      | 2. Diabetes (43.3%)  | 3. Asthma (20.3%)    |
|                                | <i>SSD</i>   | 3.3%                    | 3.28                                         | 1. HTN (51.0%)      | 2. Diabetes (44.6%)  | 3. Asthma (20.2%)    |
|                                | <i>BD</i>    | 2.8%                    | 3.24                                         | 1. HTN (42.1%)      | 2. Diabetes (38.9%)  | 3. Arthritis (22.2%) |
| <b>COPD</b>                    | <i>Total</i> | 2.7%                    | 3.22                                         | 1. HTN (39.7%)      | 2. Diabetes (38.9%)  | 3. Asthma (35.7%)    |
|                                | <i>SSD</i>   | 2.6%                    | 3.20                                         | 1. Diabetes (41.2%) | 2. HTN (39.2%)       | 3. Asthma (35.7%)    |
|                                | <i>BD</i>    | 3.0%                    | 3.25                                         | 1. HTN (41.0%)      | 2. Asthma (35.8%)    | 3. Diabetes (32.8%)  |

*Note.* SSD: Schizophrenia Spectrum disorders. BD: Bipolar disorders. HTN: hypertension

Table 4. Associations between specific comorbidities, multimorbidity and HoNOS scores. Models were adjusted by age and sex (Model 1), and then additionally adjusted by IMD (Model 2a) or SMI diagnosis (Model 2b).

|                                 | HoNOS<br>Mean<br>(SD) | Unadjusted<br>B (95% CI)    | Model 1<br>B (95% CI)       | Model 2a<br>B (95% CI)      | Model 2b<br>B (95% CI)      |
|---------------------------------|-----------------------|-----------------------------|-----------------------------|-----------------------------|-----------------------------|
| <b>Physical comorbidities</b>   |                       |                             |                             |                             |                             |
| <b>Diabetes</b>                 | 10.93<br>(6.08)       | 0.652 (0.389 –<br>0.914)*** | 0.464 (0.198 –<br>0.730)*** | 0.485 (0.215 –<br>0.755)*** | 0.359 (0.094 –<br>0.625)**  |
| Ref: No diabetes                | 10.28<br>(6.05)       |                             |                             |                             |                             |
| <b>Hypertension</b>             | 10.99<br>(6.02)       | 0.713 (0.446 –<br>0.980)*** | 0.401 (0.123 –<br>0.680)**  | 0.368 (0.084 –<br>0.652)*   | 0.297 (0.019 –<br>0.576)*   |
| Ref: No hypertension            | 10.27<br>(6.06)       |                             |                             |                             |                             |
| <b>Asthma</b>                   | 11.05<br>(6.16)       | 0.734 (0.417 –<br>1.051)*** | 0.806 (0.490 –<br>1.121)*** | 0.770 (0.450 –<br>1.091)*** | 0.804 (0.489 –<br>1.118)*** |
| Ref: No asthma                  | 10.31<br>(6.04)       |                             |                             |                             |                             |
| <b>Arthritis</b>                | 12.01<br>(6.19)       | 1.728 (1.322 –<br>2.134)*** | 1.570 (1.156 –<br>1.984)*** | 1.558 (1.142 –<br>1.974)*** | 1.567 (1.155 –<br>1.980)*** |
| Ref: No arthritis               | 10.28<br>(6.03)       |                             |                             |                             |                             |
| <b>Epilepsy</b>                 | 11.40<br>(6.19)       | 1.055 (0.596 –<br>1.514)*** | 1.066 (0.609 –<br>1.523)*** | 1.089 (0.628 –<br>1.549)*** | 0.982 (0.527 –<br>1.437)*** |
| Ref: No epilepsy                | 10.35<br>(6.05)       |                             |                             |                             |                             |
| <b>CVA</b>                      | 11.81<br>(6.22)       | 1.487 (1.022 –<br>1.951)*** | 1.195 (0.728 –<br>1.662)*** | 1.180 (0.712 –<br>1.649)*** | 1.162 (0.697 –<br>1.627)*** |
| Ref: No CVA                     | 10.33<br>(6.04)       |                             |                             |                             |                             |
| <b>Eczema</b>                   | 11.12<br>(6.19)       | 0.753 (0.249 –<br>1.257)**  | 0.838 (0.336 –<br>1.340)*** | 0.728 (0.220 –<br>1.237)**  | 0.799 (0.299 –<br>1.299)**  |
| Ref: No eczema                  | 10.37<br>(6.05)       |                             |                             |                             |                             |
| <b>Migraine</b>                 | 10.33<br>(5.73)       | -0.078 (-0.600 –<br>0.445)  | 0.212 (-0.311 –<br>0.734)   | 0.227 (-0.300 –<br>0.754)   | 0.302 (-0.218 –<br>0.823)   |
| Ref: No migraine                | 10.40<br>(6.07)       |                             |                             |                             |                             |
| <b>Ischaemic heart disease</b>  | 11.64<br>(5.92)       | 1.294 (0.766 –<br>1.822)*** | 0.864 (0.332 –<br>1.395)*** | 0.853 (0.318 –<br>1.387)**  | 0.849 (0.320 –<br>1.379)**  |
| Ref: No ischaemic heart disease | 10.35<br>(6.06)       |                             |                             |                             |                             |
| <b>COPD</b>                     | 12.08<br>(5.78)       | 1.733 (1.158 –<br>2.309)*** | 1.326 (0.745 –<br>1.908)*** | 1.336 (0.750 –<br>1.923)*** | 1.397 (0.818 –<br>1.977)*** |
| Ref: No COPD                    | 10.34<br>(6.06)       |                             |                             |                             |                             |
| <b>Multimorbidity</b>           |                       |                             |                             |                             |                             |

|                                |              |                          |                          |                          |                          |
|--------------------------------|--------------|--------------------------|--------------------------|--------------------------|--------------------------|
| <b>Number of comorbidities</b> |              | 0.487 (0.406 – 0.567)*** | 0.423 (0.339 – 0.507)*** | 0.424 (0.339 – 0.510)*** | 0.404 (0.320 – 0.488)*** |
| <b>1 or more comorbidities</b> | 10.96 (6.08) | 1.053 (0.850 – 1.256)*** | 0.893 (0.685 – 1.101)*** | 0.895 (0.681 – 1.109)*** | 0.823 (0.615 – 1.031)*** |
| Ref: No comorbidities          | 9.90 (5.99)  |                          |                          |                          |                          |
| <b>2 or more comorbidities</b> | 11.34 (6.13) | 1.214 (0.973 – 1.455)*** | 1.021 (0.772 – 1.269)*** | 1.020 (0.768 – 1.272)*** | 0.968 (0.720 – 1.216)*** |
| Ref: Less than 1 comorbidities | 10.12 (6.01) |                          |                          |                          |                          |

Note: \*\*\* p < .001; \*\* p < .01; \* p < .05

Figure 1. Comparison of number of physical health comorbidities (a) and specific physical comorbidities (b) by SMI diagnosis.

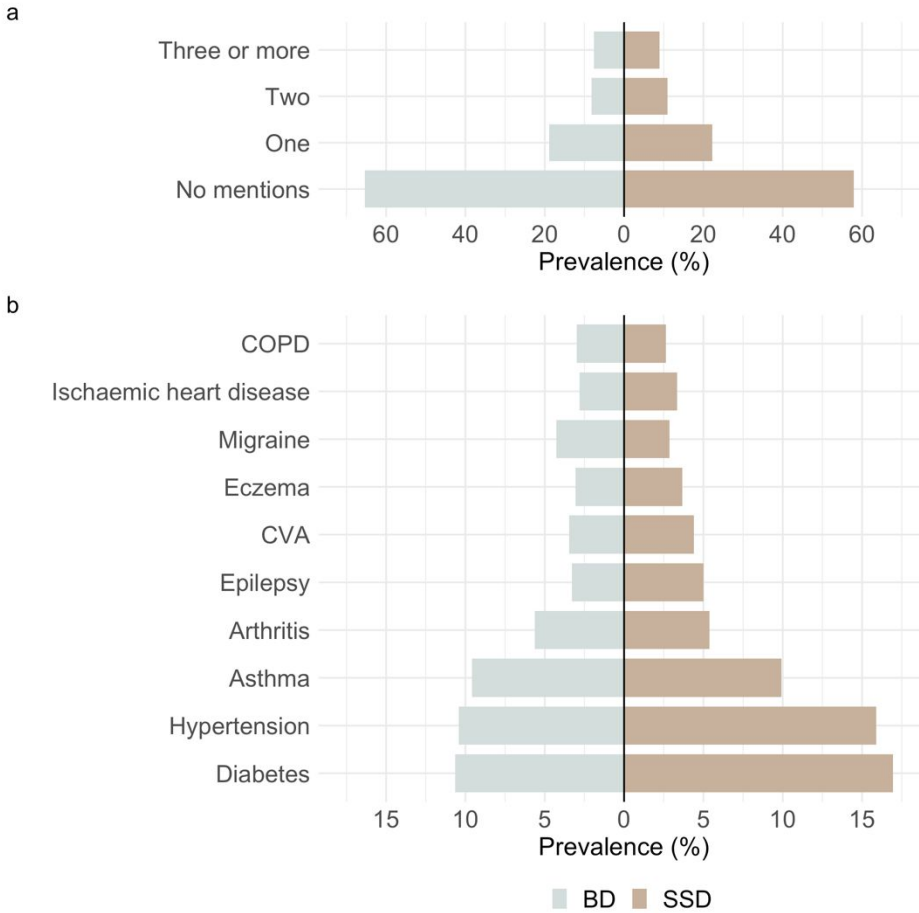

Figure 2. Prevalence of the most prevalent physical health conditions across ethnicities within the SMI cohort and the SSD and BD subgroups.

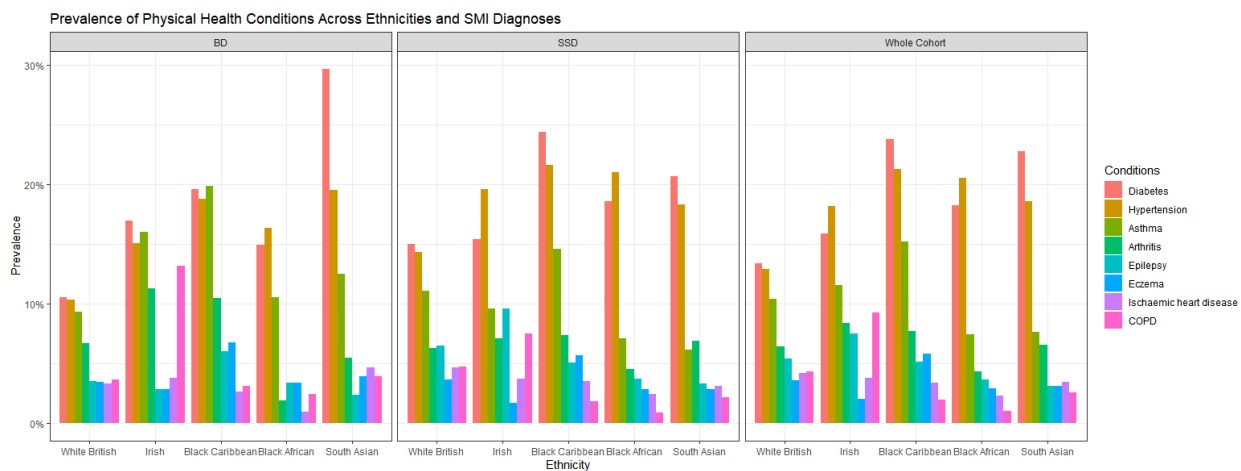



Figure 3. Visualization of most prevalent comorbidities in individuals with SMI and comorbid diabetes.

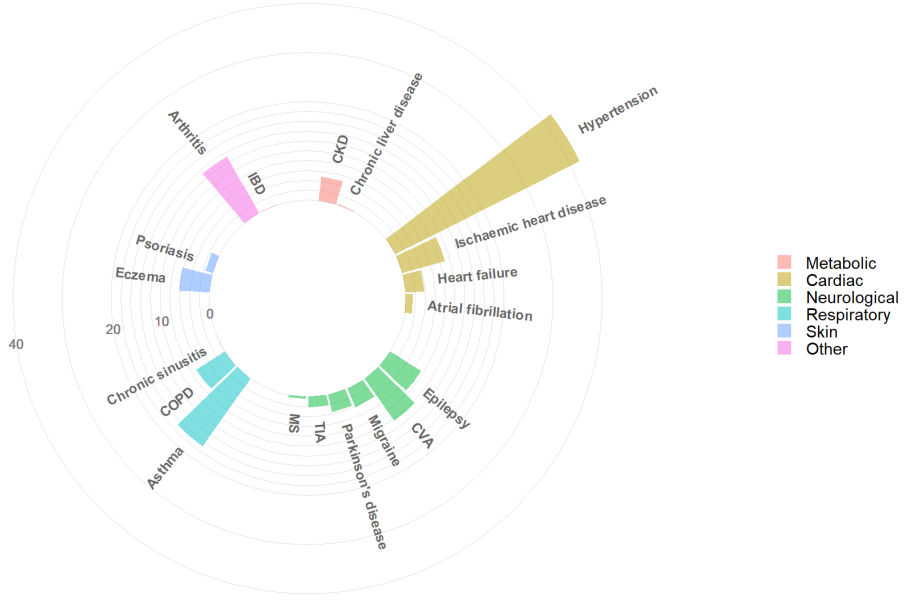

iew only

Figure 4. Visualization of most prevalent comorbidities in individuals with SMI and comorbid hypertension.

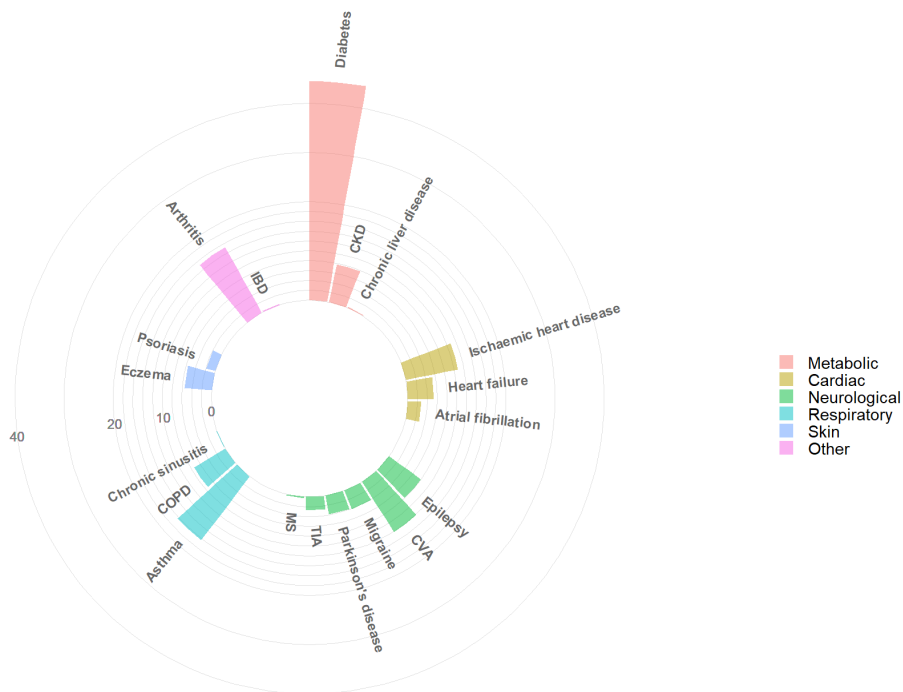

iew only

Figure 5. Visualization of most prevalent comorbidities in individuals with SMI and comorbid asthma.

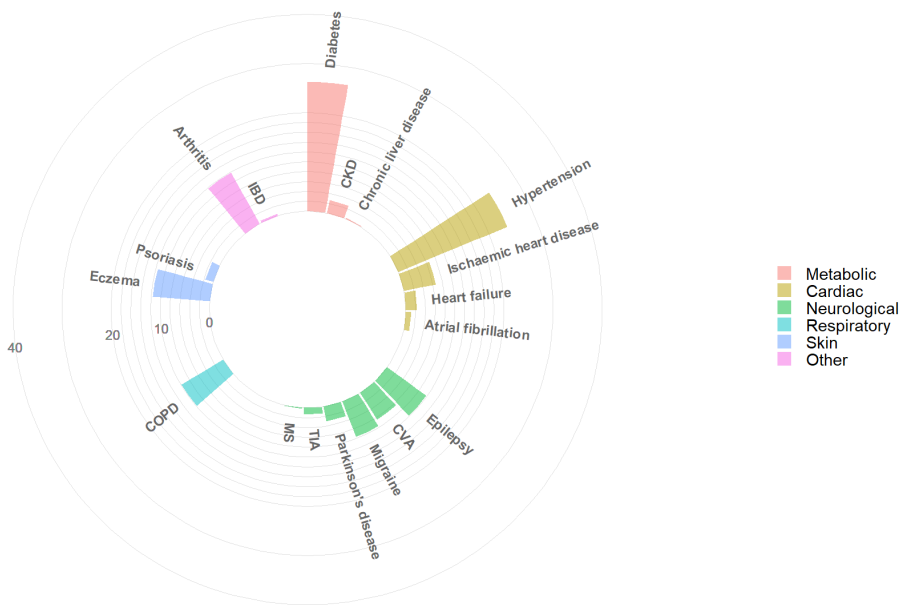

iew only

## Supplemental Material

### Supplemental Tables

Supplemental Table 1. Meta-annotations performance results for Diagnosis and Status

Supplemental Table 2. Prevalence estimates and sex differences within the whole SMI cohort and SSD and BD subgroups.

Supplemental Table 3. Prevalence for each condition by age ranges at first SMI diagnosis for the whole SMI cohort and SSD and BD subgroups.

Supplemental Tables 4a, 4b and 4c. Prevalence for each condition across ethnicities for the whole SMI cohort and SSD and BD subgroups.

Supplemental Table 5. Social deprivation prevalence for each condition for the whole cohort and within SSD and BD.

Supplemental Table 6. Sociodemographic features of cohort in HoNOS subsample analysis

Supplemental Table 7. Associations between comorbidities and HoNOS scores in SSD.

Supplemental Table 8. Associations between comorbidities and HoNOS scores in BD.

### Supplemental Figures

Supplemental Figure 1. Distribution of all conditions in the SMI cohort by SMI group.

Supplemental Figure 2. Prevalence rates for age at SMI diagnoses per condition and comparison between individuals with BD and SSD.

**Appendix 1.** SNOMED Container and Concept Level Groupings for physical health conditions included in this study.

**Supplemental Tables***Supplemental Table 1. Meta-annotations performance results for Diagnosis and Status*

| <b>Meta-Annotation</b> | <b>Values</b>    | <b>F1 (macro/weighted)</b> | <b>P (macro/weighted)</b> | <b>R (macro/weighted)</b> |
|------------------------|------------------|----------------------------|---------------------------|---------------------------|
| Diagnosis              | Patient / Other  | 0.94 / 0.94                | 0.95 / 0.95               | 0.92 / 0.94               |
| Status                 | Affirmed / Other | 0.89 / 0.98                | 0.94 / 0.98               | 0.85 / 0.98               |

For peer review only

Supplemental Table 2. Prevalence estimates and sex differences within the whole SMI cohort and SSD and BD subgroups.

|                                          | Total Cohort   |                | SSD            |                | p-value | BD            |               | p-value |
|------------------------------------------|----------------|----------------|----------------|----------------|---------|---------------|---------------|---------|
|                                          | Female         | Male           | Female         | Male           |         | Female        | Male          |         |
| <b>Diabetes</b>                          | 1282<br>(15.8) | 1403<br>(15)   | 1021<br>(18.8) | 1187<br>(15.6) | <.001   | 261<br>(9.7)  | 216<br>(12.1) | .190    |
| <b>Hypertension ***</b>                  | 1325<br>(16.3) | 1212<br>(12.9) | 1060<br>(19.6) | 1010<br>(13.3) | <.001   | 265<br>(9.8)  | 202<br>(11.4) | 1.000   |
| <b>Asthma **</b>                         | 869<br>(10.7)  | 852<br>(9.1)   | 559<br>(10.3)  | 732<br>(9.6)   | 1.000   | 310<br>(11.5) | 120<br>(6.7)  | <.001   |
| <b>Arthritis ***</b>                     | 657<br>(8.1)   | 297<br>(3.2)   | 471<br>(8.7)   | 231<br>(3.0)   | <.001   | 186<br>(6.9)  | 66<br>(3.7)   | <.001   |
| <b>Epilepsy</b>                          | 349<br>(4.3)   | 450<br>(4.8)   | 253<br>(4.7)   | 399<br>(5.3)   | 1.000   | 96<br>(3.6)   | 51<br>(2.9)   | 1.000   |
| <b>Cerebrovascular diseases</b>          | 367<br>(4.5)   | 361<br>(3.9)   | 265<br>(4.9)   | 308<br>(4.1)   | .499    | 102<br>(3.8)  | 53<br>(3.0)   | 1.000   |
| <b>Eczema *</b>                          | 331<br>(4.1)   | 285<br>(3.0)   | 238<br>(4.4)   | 241<br>(3.2)   | <.01    | 93<br>(3.4)   | 44<br>(2.5)   | 1.000   |
| <b>Migraine ***</b>                      | 369<br>(4.5)   | 194<br>(2.1)   | 217<br>(4.0)   | 155<br>(2.0)   | <.001   | 152<br>(5.6)  | 39<br>(2.2)   | <.001   |
| <b>Ischaemic heart disease</b>           | 249<br>(3.1)   | 312<br>(3.3)   | 196<br>(3.6)   | 239<br>(3.1)   | 1.000   | 53<br>(2.0)   | 73<br>(4.2)   | <.001   |
| <b>Chronic Obstructive Lung diseases</b> | 237<br>(2.9)   | 239<br>(2.5)   | 153<br>(2.8)   | 189<br>(2.5)   | 1.000   | 84<br>(3.1)   | 50<br>(2.8)   | 1.000   |
| <b>Chronic Kidney disease</b>            | 158<br>(1.9)   | 121<br>(1.3)   | 104<br>(1.9)   | 75<br>(1.0)    | <.001   | 54<br>(2.0)   | 46<br>(2.6)   | 1.000   |
| <b>Parkinson disease</b>                 | 113<br>(1.4)   | 153<br>(1.6)   | 81<br>(1.5)    | 120<br>(1.6)   | 1.000   | 32<br>(1.2)   | 33<br>(1.9)   | 1.000   |
| <b>Heart failure</b>                     | 123<br>(1.5)   | 99<br>(1.0)    | 105<br>(1.9)   | 82<br>(1.1)    | .001    | 18<br>(0.7)   | 17<br>(1.0)   | 1.000   |
| <b>Psoriasis</b>                         | 76<br>(0.9)    | 103<br>(1.1)   | 45<br>(0.8)    | 84<br>(1.1)    | 1.000   | 31<br>(1.1)   | 19<br>(1.1)   | 1.000   |
| <b>Atrial fibrillation</b>               | 65<br>(0.8)    | 68<br>(0.7)    | 50<br>(0.9)    | 50<br>(0.7)    | 1.000   | 15<br>(0.6)   | 18<br>(1.0)   | 1.000   |
| <b>Transient Ischaemic Attack</b>        | 79<br>(1.0)    | 51<br>(0.5)    | 53<br>(1.0)    | 38<br>(0.5)    | .037    | 26<br>(1.0)   | 13<br>(0.7)   | 1.000   |
| <b>Inflammatory Bowel diseases</b>       | 26<br>(0.3)    | 14<br>(0.1)    | 18<br>(0.3)    | 7<br>(0.1)     | .080    | 8<br>(0.3)    | 7<br>(0.4)    | 1.000   |

|                              |             |             |            |             |   |            |            |   |
|------------------------------|-------------|-------------|------------|-------------|---|------------|------------|---|
| <b>Multiple Sclerosis</b>    | 17<br>(0.2) | 15<br>(0.2) | 9<br>(0.2) | 10<br>(0.1) | - | 8<br>(0.3) | 5<br>(0.3) | - |
| <b>Chronic liver disease</b> | 10<br>(0.1) | 12<br>(0.1) | 9          | 11<br>(0.1) | - | 1<br>(0.0) | 1<br>(0.1) | - |
| <b>Chronic Sinusitis</b>     | 3<br>(0.0)  | 3<br>(0.0)  | 3          | 3<br>(0.0)  | - | 0<br>(0.0) | 0<br>(0.0) | - |

Note. \*\*\*  $p < .001$ ; \*\*  $p < .01$ ; \*  $p < .05$  for comparisons between male and female groups in the whole SMI cohort

For peer review only

1  
2  
3 *Supplemental Table 3. Prevalence for each condition for the whole cohort and diagnoses*  
4 *subgroups and across age ranges at first SMI diagnosis.*  
5  
6  
7  
8  
9  
10  
11  
12  
13  
14  
15  
16  
17  
18  
19  
20  
21  
22  
23  
24  
25  
26  
27  
28  
29  
30  
31  
32  
33  
34  
35  
36  
37  
38  
39  
40  
41  
42  
43  
44  
45  
46  
47  
48  
49  
50  
51  
52  
53  
54  
55  
56  
57  
58  
59  
60

For peer review only



|                               | Total  |        |        |        |        | SSD    |        |        |        |        | BD    |        |        |        |        |        |       |
|-------------------------------|--------|--------|--------|--------|--------|--------|--------|--------|--------|--------|-------|--------|--------|--------|--------|--------|-------|
|                               | 15-34  | 35-44  | 45-54  | 55-64  | 65+    | 15-34  | 35-44  | 45-54  | 55-64  | 65+    | 15-34 | 35-44  | 45-54  | 55-64  | 65+    |        |       |
| <b>Total</b>                  | 7497   | 3736   | 2783   | 1525   | 1959   | 5607   | 2792   | 2057   | 1067   | 1496   |       | 1890   | 944    | 726    | 458    | 463    |       |
| <b>Diabetes***</b>            | 697    | 559    | 531    | 371    | 528    | 591    | 479    | 439    | 284    | 415    | p <   | 106    | 80     | 92     | 87     | 113    | p <   |
|                               | (9.3)  | (15.0) | (19.1) | (24.3) | (27.0) | (10.5) | (17.2) | (21.3) | (26.6) | (27.7) | 0.001 | (5.6)  | (8.5)  | (12.7) | (19.0) | (24.4) | 0.001 |
| <b>Hypertension***</b>        | 472    | 426    | 514    | 416    | 709    | 412    | 372    | 411    | 313    | 562    | p <   | 60     | 54     | 103    | 103    | 147    | p <   |
|                               | (6.3)  | (11.4) | (18.5) | (27.3) | (36.2) | (7.3)  | (13.3) | (20.0) | (29.3) | (37.6) | 0.001 | (3.2)  | (5.7)  | (14.2) | (22.5) | (31.7) | 0.001 |
| <b>Asthma***</b>              | 820    | 347    | 297    | 126    | 132    | 635    | 248    | 218    | 89     | 101    | p <   | 185    | 99     | 79     | 37     | 31     | p =   |
|                               | (10.9) | (9.3)  | (10.7) | (8.3)  | (6.7)  | (11.3) | (8.9)  | (10.6) | (8.3)  | (6.8)  | 0.001 | (9.8)  | (10.5) | (10.9) | (8.1)  | (6.7)  | 1.000 |
| <b>Arthritis***</b>           | 125    | 154    | 229    | 167    | 279    | 93     | 120    | 159    | 118    | 212    | p <   | 32     | 34     | 70     | 49     | 67     | p <   |
|                               | (1.7)  | (4.1)  | (8.2)  | (11.0) | (14.2) | (1.7)  | (4.3)  | (7.7)  | (11.1) | (14.2) | 0.001 | (1.7)  | (3.6)  | (9.6)  | (10.7) | (14.5) | 0.001 |
| <b>Epilepsy</b>               | 339    | 188    | 133    | 67     | 72     | 276    | 154    | 112    | 55     | 55     | 1.000 | 63     | 34     | 21     | 12     | 17     | 1.000 |
|                               | (4.5)  | (5.0)  | (4.8)  | (4.4)  | (3.7)  | (4.9)  | (5.5)  | (5.4)  | (5.2)  | (3.7)  |       | (3.3)  | (3.6)  | (2.9)  | (2.6)  | (3.7)  |       |
| <b>CVA***</b>                 | 166    | 112    | 122    | 114    | 214    | 143    | 87     | 95     | 84     | 164    | p <   | 23     | 25     | 27     | 30     | 50     | p <   |
|                               | (2.2)  | (3.0)  | (4.4)  | (7.5)  | (10.9) | (2.6)  | (3.1)  | (4.6)  | (7.9)  | (11.0) | 0.001 | (1.2)  | (2.6)  | (3.7)  | (6.6)  | (10.8) | 0.001 |
| <b>Eczema</b>                 | 310    | 115    | 79     | 50     | 62     | 244    | 88     | 58     | 37     | 52     | 0.120 | 66     | 27     | 21     | 13     | 10     | 1.000 |
|                               | (4.1)  | (3.1)  | (2.8)  | (3.3)  | (3.2)  | (4.4)  | (3.2)  | (2.8)  | (3.5)  | (3.5)  |       | (3.5)  | (2.9)  | (2.9)  | (2.8)  | (2.2)  |       |
| <b>Migraine***</b>            | 300    | 122    | 87     | 32     | 23     | 207    | 73     | 53     | 24     | 15     | p <   | 93     | 49     | 34     | 8      | 8      | 0.011 |
|                               | (4.0)  | (3.3)  | (3.1)  | (2.1)  | (1.2)  | (3.7)  | (2.6)  | (2.6)  | (2.2)  | (1.0)  | 0.001 | (4.9)  | (5.2)  | (4.7)  | (1.7)  | (1.7)  |       |
| <b>Isc heart disease***</b>   | 111    | 73     | 105    | 95     | 177    | 96     | 60     | 80     | 65     | 134    | p <   | 15     | 13     | 25     | 30     | 43     | p <   |
|                               | (1.5)  | (2.0)  | (3.8)  | (6.2)  | (9.0)  | (1.7)  | (2.1)  | (3.9)  | (6.1)  | (9.0)  | 0.001 | (0.8)  | (1.4)  | (3.4)  | (6.6)  | (9.3)  | 0.001 |
| <b>COPD***</b>                | 39     | 58     | 119    | 115    | 145    | 29     | 40     | 87     | 82     | 104    | p <   | 10     | 18     | 32     | 33     | 41     | p <   |
|                               | (0.5)  | (1.6)  | (4.3)  | (7.5)  | (7.4)  | (0.5)  | (1.4)  | (4.2)  | (7.7)  | (7.0)  | 0.001 | (0.5)  | (1.9)  | (4.4)  | (7.2)  | (8.9)  | 0.001 |
| <b>CKD***</b>                 | 12     | 18     | 41     | 55     | 153    | 9      | 14     | 28     | 33     | 95     | p <   | 3      | 4      | 13     | 22     | 58     | -     |
|                               | (0.2)  | (0.5)  | (1.5)  | (3.6)  | (7.8)  | (0.2)  | (0.5)  | (1.4)  | (3.1)  | (6.4)  | 0.001 | (0.2)  | (0.4)  | (1.8)  | (4.8)  | (12.5) |       |
| <b>PD***</b>                  | 70     | 33     | 37     | 41     | 85     | 57     | 22     | 27     | 32     | 63     | p <   | 13     | 11     | 10     | 9      | 22     | p <   |
|                               | (0.9)  | (0.9)  | (1.3)  | (2.7)  | (4.3)  | (1.0)  | (0.8)  | (1.3)  | (3.0)  | (4.2)  | 0.001 | (0.7)  | (1.2)  | (1.4)  | (2.0)  | (4.8)  | 0.001 |
| <b>HF***</b>                  | 18     | 30     | 42     | 40     | 92     | 17     | 30     | 38     | 29     | 73     | p <   | 1      | 0      | 4      | 11     | 19     | -     |
|                               | (0.2)  | (0.8)  | (1.5)  | (2.6)  | (4.7)  | (0.3)  | (1.1)  | (1.8)  | (2.7)  | (4.9)  | 0.001 | (0.1)  | (0.0)  | (0.6)  | (2.4)  | (4.1)  |       |
| <b>Psoriasis</b>              | 67     | 33     | 37     | 17     | 25     | 54     | 25     | 25     | 9      | 16     | 1.000 | 13     | 8      | 12     | 8      | 9      | 0.450 |
|                               | (0.9)  | (0.9)  | (1.3)  | (1.1)  | (1.3)  | (1.0)  | (0.9)  | (1.2)  | (0.8)  | (1.1)  |       | (0.7)  | (0.8)  | (1.7)  | (1.7)  | (1.9)  |       |
| <b>Atrial fibrillation***</b> | 14     | 7      | 12     | 19     | 81     | 11     | 6      | 8      | 12     | 63     | p <   | 3      | 1      | 4      | 7      | 18     | -     |
|                               | (0.2)  | (0.2)  | (0.4)  | (1.2)  | (4.1)  | (0.2)  | (0.2)  | (0.4)  | (0.1)  | (4.2)  | 0.001 | (0.20) | (0.1)  | (0.6)  | (1.5)  | (3.9)  |       |
| <b>TIA***</b>                 | 20     | 18     | 19     | 23     | 50     | 15     | 15     | 13     | 14     | 34     | p <   | 5      | 3      | 6      | 9      | 16     | -     |
|                               | (0.3)  | (0.5)  | (0.7)  | (1.5)  | (2.6)  | (0.3)  | (0.5)  | (0.6)  | (1.3)  | (2.3)  | 0.001 | (0.3)  | (0.3)  | (0.8)  | (2.0)  | (3.5)  |       |
| <b>IBD</b>                    | 9      | 8      | 12     | 6      | 5      | 4      | 6      | 7      | 3      | 5      | -     | 5      | 2      | 5      | 3      | 0      | -     |
|                               | (0.1)  | (0.2)  | (0.4)  | (0.4)  | (0.3)  | (0.1)  | (0.2)  | (0.3)  | (0.3)  | (0.3)  |       | (0.3)  | (0.2)  | (0.7)  | (0.7)  | (0.0)  |       |
| <b>MS</b>                     | 6      | 8      | 11     | 5      | 2      | 4      | 4      | 8      | 3      | 0      | -     | 2      | 4      | 3      | 2      | 2      | -     |
|                               | (0.1)  | (0.2)  | (0.4)  | (0.3)  | (0.1)  | (0.1)  | (0.1)  | (0.4)  | (0.3)  | (0.0)  |       | (0.1)  | (0.4)  | (0.4)  | (0.4)  | (0.4)  |       |

|                              |            |            |            |            |            |            |            |            |            |            |   |            |            |            |            |            |   |
|------------------------------|------------|------------|------------|------------|------------|------------|------------|------------|------------|------------|---|------------|------------|------------|------------|------------|---|
| <b>Chronic liver disease</b> | 5<br>(0.1) | 7<br>(0.2) | 6<br>(0.2) | 3<br>(0.2) | 1<br>(0.1) | 5<br>(0.1) | 7<br>(0.3) | 5<br>(0.2) | 2<br>(0.2) | 1<br>(0.1) | - | 0<br>(0.0) | 0<br>(0.0) | 1<br>(0.1) | 1<br>(0.2) | 0<br>(0.0) | - |
| <b>Chronic sinusitis</b>     | 5<br>(0.1) | 0<br>(0.0) | 1<br>(0.0) | 0<br>(0.0) | 0<br>(0.0) | 5<br>(0.1) | 0<br>(0.0) | 1<br>(0.0) | 0<br>(0.0) | 0<br>(0.0) | - | 0<br>(0.0) | 0<br>(0.0) | 0<br>(0.0) | 0<br>(0.0) | 0<br>(0.0) | - |

Note: \*\*\* p < .001; \*\* p < .01; \* p < .05 for comparisons between age groups within the SMI cohort.

For peer review only

Supplemental Tables 4. Prevalence for each condition for the whole cohort and diagnoses subgroups and across ethnicities

Table 4a. Prevalence for each condition for the whole cohort and ethnicity.

|                                 | White<br>British<br>n=6243<br>(35.7%) | Irish<br>n=346<br>(2.0%) | Black<br>Caribbean<br>n=3182<br>(18.2%) | Black<br>African<br>n=2094<br>(12.0%) | South<br>Asian<br>n=549<br>(3.1%) | Other <sup>s</sup><br>n=2846<br>(22.0%) | Unknown <sup>s</sup><br>n=1240<br>(7.1%) | Statistics                             |
|---------------------------------|---------------------------------------|--------------------------|-----------------------------------------|---------------------------------------|-----------------------------------|-----------------------------------------|------------------------------------------|----------------------------------------|
| <b>Diabetes</b>                 | 837 (13.4)                            | 55 (15.9)                | 757 (23.8)                              | 382 (18.2)                            | 125 (22.8)                        | 461 (12.0)                              | 69 (5.6)                                 | $\chi^2 (4) = 172.49$ ;<br>$p < 0.001$ |
| <b>Hypertension</b>             | 804 (12.9)                            | 63 (18.2)                | 678 (21.3)                              | 430 (20.5)                            | 102 (18.6)                        | 400 (10.4)                              | 60 (4.8)                                 | $\chi^2 (4) = 137.98$ ;<br>$p < 0.001$ |
| <b>Asthma</b>                   | 651 (10.4)                            | 40 (11.6)                | 484 (15.2)                              | 156 (7.4)                             | 42 (7.7)                          | 296 (7.7)                               | 53 (4.3)                                 | $\chi^2 (4) = 92.58$ ; $p < 0.001$     |
| <b>Arthritis</b>                | 402 (6.4)                             | 29 (8.4)                 | 246 (7.7)                               | 90 (4.3)                              | 36 (6.6)                          | 139 (3.6)                               | 12 (1.0)                                 | $\chi^2 (4) = 26.80$ ; $p < 0.001$     |
| <b>Epilepsy</b>                 | 339 (5.4)                             | 26 (7.5)                 | 164 (5.2)                               | 77 (3.7)                              | 17 (3.1)                          | 147 (3.8)                               | 29 (2.4)                                 | $\chi^2 (4) = 19.02$ ; $p = 0.010$     |
| <b>Cerebrovascular accident</b> | 274 (4.4)                             | 20 (5.8)                 | 184 (5.8)                               | 92 (4.4)                              | 25 (4.6)                          | 116 (3.0)                               | 17 (1.4)                                 | $\chi^2 (4) = 10.60$ ; $p = 0.408$     |
| <b>Eczema</b>                   | 222 (3.6)                             | 7 (2.0)                  | 185 (5.8)                               | 61 (2.9)                              | 17 (3.1)                          | 108 (2.8)                               | 16 (1.3)                                 | $\chi^2 (4) = 41.93$ ; $p < 0.001$     |
| <b>Migraine</b>                 | 235 (3.8)                             | 12 (3.5)                 | 129 (4.1)                               | 61 (2.9)                              | 17 (3.1)                          | 98 (2.5)                                | 12 (1.0)                                 | $\chi^2 (4) = 5.44$ ; $p > .99$        |
| <b>Ischemic heart disease</b>   | 261 (4.2)                             | 13 (3.8)                 | 108 (3.4)                               | 48 (2.3)                              | 19 (3.5)                          | 99 (2.6)                                | 13 (1.0)                                 | $\chi^2 (4) = 16.74$ ; $p = 0.028$     |
| <b>COPD</b>                     | 271 (4.3)                             | 32 (9.2)                 | 63 (2.0)                                | 21 (1.0)                              | 14 (2.6)                          | 60 (1.6)                                | 15 (1.2)                                 | $\chi^2 (4) = 114.69$ ;<br>$p < 0.001$ |
| <b>CKD</b>                      | 125 (2.0)                             | 9 (2.6)                  | 56 (1.8)                                | 32 (1.5)                              | 13 (2.4)                          | 37 (1.0)                                | 7 (0.6)                                  | $\chi^2 (4) = 3.81$ ; $p > .99$        |
| <b>Parkinson's disease</b>      | 117 (1.9)                             | 6 (1.7)                  | 56 (1.8)                                | 25 (1.2)                              | 11 (2.0)                          | 45 (1.2)                                | 6 (0.5)                                  | $\chi^2 (4) = 4.56$ ; $p > .99$        |
| <b>Heart failure</b>            | 88 (1.4)                              | 8 (2.3)                  | 55 (1.7)                                | 29 (1.4)                              | 8 (1.5)                           | 31 (0.8)                                | 3 (0.2)                                  | $\chi^2 (4) = 3.16$ ; $p > .99$        |
| <b>Psoriasis</b>                | 103 (1.6)                             | 4 (1.2)                  | 12 (0.4)                                | 6 (0.3)                               | 5 (0.9)                           | 44 (1.1)                                | 5 (0.4)                                  | *                                      |
| <b>Atrial fibrillation</b>      | 69 (1.1)                              | 9 (2.6)                  | 23 (0.7)                                | 11 (0.5)                              | 2 (0.4)                           | 15 (0.4)                                | 4 (0.3)                                  | *                                      |

|                              |          |         |          |          |         |          |         |   |
|------------------------------|----------|---------|----------|----------|---------|----------|---------|---|
| <b>TIA</b>                   | 58 (0.9) | 7 (2.0) | 24 (0.8) | 15 (0.7) | 7 (1.3) | 13 (0.3) | 6 (0.5) | * |
| <b>IBD</b>                   | 24 (0.4) | 1 (0.3) | 2 (0.1)  | 2 (0.1)  | 1 (0.2) | 9 (0.2)  | 1 (0.1) | * |
| <b>Multiple sclerosis</b>    | 21 (0.3) | 1 (0.3) | 3 (0.1)  | 1 (0.0)  | 0 (0.0) | 4 (0.1)  | 2 (0.2) | * |
| <b>Chronic liver disease</b> | 9 (0.1)  | 1 (0.3) | 1 (0.0)  | 6 (0.3)  | 0 (0.0) | 5 (0.1)  | 0 (0.0) | * |
| <b>Chronic sinusitis</b>     | 1 (0.0)  | 0 (0.0) | 3 (0.1)  | 1 (0.0)  | 0 (0.0) | 1 (0.0)  | 0 (0.0) | * |

§Categories were dropped for statistical analysis. \* $\chi^2$  test not performed due to small population sizes

Table 4b. Prevalence for each condition across ethnicities in SSD.

|                                     | <b>White<br/>British<br/>n=4008<br/>(30.8%)</b> | <b>Irish<br/>n=240<br/>(1.8%)</b> | <b>Black<br/>Caribbean<br/>n=2799<br/>(21.5%)</b> | <b>Black<br/>African<br/>n=1886<br/>(14.5%)</b> | <b>South<br/>Asian<br/>n=421<br/>(3.2%)</b> | <b>Other<sup>§</sup><br/>n=2822<br/>(21.7%)</b> | <b>Unknown<sup>§</sup><br/>n=843<br/>(6.5%)</b> | <b>Statistics</b>                     |
|-------------------------------------|-------------------------------------------------|-----------------------------------|---------------------------------------------------|-------------------------------------------------|---------------------------------------------|-------------------------------------------------|-------------------------------------------------|---------------------------------------|
| <b>Diabetes</b>                     | 602 (15.0)                                      | 37 (15.4)                         | 682 (24.4)                                        | 351 (18.6)                                      | 87 (20.7)                                   | 390 (13.8)                                      | 59 (7.0)                                        | $\chi^2$ (4) =<br>97.10; $p < 0.001$  |
| <b>Hypertension</b>                 | 573 (14.3)                                      | 47 (19.6)                         | 606 (21.7)                                        | 396 (21.0)                                      | 77 (18.3)                                   | 322 (11.4)                                      | 49 (5.8)                                        | $\chi^2$ (4) =<br>73.74; $p < 0.001$  |
| <b>Asthma</b>                       | 443 (11.1)                                      | 23 (9.6)                          | 408 (14.6)                                        | 134 (7.1)                                       | 26 (6.2)                                    | 217 (7.7)                                       | 40 (4.7)                                        | $\chi^2$ (4) =<br>75.96; $p < 0.001$  |
| <b>Arthritis</b>                    | 252 (6.3)                                       | 17 (7.1)                          | 206 (7.4)                                         | 86 (4.6)                                        | 29 (6.9)                                    | 103 (3.6)                                       | 9 (1.1)                                         | $\chi^2$ (4) =<br>15.48; $p = 0.038$  |
| <b>Epilepsy</b>                     | 261 (6.5)                                       | 23 (9.6)                          | 141 (5.0)                                         | 70 (3.7)                                        | 14 (3.3)                                    | 117 (4.1)                                       | 26 (3.1)                                        | $\chi^2$ (4) =<br>32.45; $p < 0.001$  |
| <b>Cerebrovascular<br/>accident</b> | 188 (4.7)                                       | 15 (6.2)                          | 159 (5.7)                                         | 82 (4.3)                                        | 18 (4.3)                                    | 96 (3.4)                                        | 15 (1.8)                                        | $\chi^2$ (4) =<br>6.48; $p > 0.99$    |
| <b>Eczema</b>                       | 145 (3.6)                                       | 4 (1.7)                           | 159 (5.7)                                         | 54 (2.9)                                        | 12 (2.9)                                    | 93 (3.3)                                        | 12 (1.4)                                        | $\chi^2$ (4) =<br>33.32; $p < 0.001$  |
| <b>Migraine</b>                     | 126 (3.1)                                       | 10 (4.2)                          | 110 (3.9)                                         | 48 (2.5)                                        | 12 (2.9)                                    | 59 (2.1)                                        | 7 (0.8)                                         | $\chi^2$ (4) =<br>8.03; $p = 0.904$   |
| <b>Ischemic heart disease</b>       | 187 (4.7)                                       | 9 (3.8)                           | 98 (3.5)                                          | 46 (2.4)                                        | 13 (3.1)                                    | 74 (2.6)                                        | 8 (0.9)                                         | $\chi^2$ (4) =<br>19.15; $p = 0.007$  |
| <b>COPD</b>                         | 190 (4.7)                                       | 18 (7.5)                          | 51 (1.8)                                          | 16 (0.8)                                        | 9 (2.1)                                     | 44 (1.6)                                        | 14 (1.7)                                        | $\chi^2$ (4) =<br>101.62; $p < 0.001$ |
| <b>CKD</b>                          | 64 (1.6)                                        | 5 (2.1)                           | 45 (1.6)                                          | 26 (1.4)                                        | 10 (2.4)                                    | 24 (0.9)                                        | 5 (0.6)                                         | *                                     |
| <b>Parkinson's disease</b>          | 79 (2.0)                                        | 4 (1.7)                           | 49 (1.8)                                          | 21 (1.1)                                        | 6 (1.4)                                     | 36 (1.3)                                        | 6 (0.7)                                         | *                                     |

|                              |          |         |          |          |         |          |         |   |
|------------------------------|----------|---------|----------|----------|---------|----------|---------|---|
| <b>Heart failure</b>         | 65 (1.6) | 8 (3.3) | 50 (1.8) | 28 (1.5) | 7 (1.7) | 26 (0.9) | 3 (0.4) | * |
| <b>Psoriasis</b>             | 66 (1.6) | 2 (0.8) | 9 (0.3)  | 6 (0.3)  | 4 (1.0) | 37 (1.3) | 5 (0.6) | * |
| <b>Atrial fibrillation</b>   | 46 (1.1) | 7 (2.9) | 22 (0.8) | 11 (0.6) | 1 (0.2) | 10 (0.4) | 3 (0.4) | * |
| <b>TIA</b>                   | 34 (0.8) | 5 (2.1) | 21 (0.8) | 13 (0.7) | 6 (1.4) | 8 (0.3)  | 4 (0.5) | * |
| <b>IBD</b>                   | 12 (0.3) | 1 (0.4) | 2 (0.1)  | 2 (0.1)  | 1 (0.2) | 6 (0.2)  | 1 (0.1) | * |
| <b>Multiple sclerosis</b>    | 12 (0.3) | 1 (0.4) | 3 (0.1)  | 0 (0.0)  | 0 (0.0) | 2 (0.1)  | 1 (0.1) | * |
| <b>Chronic liver disease</b> | 7 (0.2)  | 1 (0.4) | 1 (0.0)  | 6 (0.3)  | 0 (0.0) | 5 (0.2)  | 0 (0.0) | * |
| <b>Chronic sinusitis</b>     | 1 (0.0)  | 0 (0.0) | 3 (0.1)  | 1 (0.1)  | 0 (0.0) | 1 (0.0)  | 0 (0.0) | * |

§Categories were dropped for statistical analysis. \* $\chi^2$  test not performed due to small population sizes

Table 4c. Prevalence for each condition across ethnicities in BD.

|                                 | <b>White<br/>British<br/>n=2235<br/>(49.9%)</b> | <b>Irish<br/>n=106<br/>(2.4%)</b> | <b>Black<br/>Caribbean<br/>n=383<br/>(8.5%)</b> | <b>Black<br/>African<br/>n=208<br/>(4.6%)</b> | <b>South<br/>Asian<br/>n=128<br/>(2.9%)</b> | <b>Other<sup>§</sup><br/>n=1024<br/>(22.9%)</b> | <b>Unknown<sup>§</sup><br/>n=397<br/>(8.9%)</b> | <b>Statistics</b>                    |
|---------------------------------|-------------------------------------------------|-----------------------------------|-------------------------------------------------|-----------------------------------------------|---------------------------------------------|-------------------------------------------------|-------------------------------------------------|--------------------------------------|
| <b>Diabetes</b>                 | 235 (10.5)                                      | 18 (17.0)                         | 75 (19.6)                                       | 31 (14.9)                                     | 38 (29.7)                                   | 71 (6.9)                                        | 10 (2.5)                                        | $\chi^2$ (4) =<br>60.65; $p < 0.001$ |
| <b>Hypertension</b>             | 231 (10.3)                                      | 16 (15.1)                         | 72 (18.8)                                       | 34 (16.3)                                     | 25 (19.5)                                   | 78 (7.6)                                        | 11 (2.8)                                        | $\chi^2$ (4) =<br>32.99; $p < 0.001$ |
| <b>Asthma</b>                   | 208 (9.3)                                       | 17 (16.0)                         | 76 (19.8)                                       | 22 (10.6)                                     | 16 (12.5)                                   | 79 (7.7)                                        | 13 (3.3)                                        | $\chi^2$ (4) =<br>39.95; $p < 0.001$ |
| <b>Arthritis</b>                | 150 (6.7)                                       | 12 (11.3)                         | 40 (10.4)                                       | 4 (1.9)                                       | 7 (5.5)                                     | 36 (3.5)                                        | 3 (0.8)                                         | $\chi^2$ (4) =<br>19.09; $p = 0.004$ |
| <b>Epilepsy</b>                 | 78 (3.5)                                        | 3 (2.8)                           | 23 (6.0)                                        | 7 (3.4)                                       | 3 (2.3)                                     | 30 (2.9)                                        | 3 (0.8)                                         | *                                    |
| <b>Cerebrovascular accident</b> | 86 (3.8)                                        | 5 (4.7)                           | 25 (6.5)                                        | 10 (4.8)                                      | 7 (5.5)                                     | 20 (2.0)                                        | 2 (0.5)                                         | *                                    |
| <b>Eczema</b>                   | 77 (3.4)                                        | 3 (2.8)                           | 26 (6.8)                                        | 7 (3.4)                                       | 5 (3.9)                                     | 15 (1.5)                                        | 4 (1.0)                                         | *                                    |
| <b>Migraine</b>                 | 109 (4.9)                                       | 2 (1.9)                           | 19 (5.0)                                        | 13 (6.2)                                      | 5 (3.9)                                     | 39 (3.8)                                        | 5 (1.3)                                         | $\chi^2$ (4) =<br>3.17; $p > 0.99$   |
| <b>Ischemic heart disease</b>   | 74 (3.3)                                        | 4 (3.8)                           | 10 (2.6)                                        | 2 (1.0)                                       | 6 (4.7)                                     | 25 (2.4)                                        | 5 (1.3)                                         | *                                    |

|                              |          |           |          |         |         |          |         |   |
|------------------------------|----------|-----------|----------|---------|---------|----------|---------|---|
| <b>COPD</b>                  | 81 (3.6) | 14 (13.2) | 12 (3.1) | 5 (2.4) | 5 (3.9) | 16 (1.6) | 1 (0.3) | * |
| <b>CKD</b>                   | 61 (2.7) | 4 (3.8)   | 11 (2.9) | 6 (2.9) | 3 (2.3) | 13 (1.3) | 2 (0.5) | * |
| <b>Parkinson's disease</b>   | 38 (1.7) | 2 (1.9)   | 7 (1.8)  | 4 (1.9) | 5 (3.9) | 9 (0.9)  | 0 (0.0) | * |
| <b>Heart failure</b>         | 23 (1.0) | 0 (0.0)   | 5 (1.3)  | 1 (0.5) | 1 (0.8) | 5 (0.5)  | 0 (0.0) | * |
| <b>Psoriasis</b>             | 37 (1.7) | 2 (1.9)   | 3 (0.8)  | 0 (0.0) | 1 (0.8) | 7 (0.7)  | 0 (0.0) | * |
| <b>Atrial fibrillation</b>   | 23 (1.0) | 2 (1.9)   | 1 (0.3)  | 0 (0.0) | 1 (0.8) | 5 (0.5)  | 1 (0.3) | * |
| <b>TIA</b>                   | 24 (1.1) | 2 (1.9)   | 3 (0.8)  | 2 (1.0) | 1 (0.8) | 5 (0.5)  | 2 (0.5) | * |
| <b>IBD</b>                   | 12 (0.5) | 0 (0.0)   | 0 (0.0)  | 0 (0.0) | 0 (0.0) | 3 (0.3)  | 0 (0.0) | * |
| <b>Multiple sclerosis</b>    | 9 (0.4)  | 0 (0.0)   | 0 (0.0)  | 1 (0.5) | 0 (0.0) | 2 (0.2)  | 1 (0.3) | * |
| <b>Chronic liver disease</b> | 2 (0.1)  | 0 (0.0)   | 0 (0.0)  | 0 (0.0) | 0 (0.0) | 0 (0.0)  | 0 (0.0) | * |
| <b>Chronic sinusitis</b>     | 0 (0.0)  | 0 (0.0)   | 0 (0.0)  | 0 (0.0) | 0 (0.0) | 0 (0.0)  | 0 (0.0) | * |

<sup>§</sup>Categories were dropped for statistical analysis. \* $\chi^2$  test not performed due to small population sizes

Supplemental Table 5. Social deprivation prevalence for each condition for the whole cohort and within SSD and AD.

|                                | Total cohort             |            |            |             |                         |                               | SSD                      |            |            |             |                         |                               | AD                                 |                          |           |            |            |                         |                               |                                    |
|--------------------------------|--------------------------|------------|------------|-------------|-------------------------|-------------------------------|--------------------------|------------|------------|-------------|-------------------------|-------------------------------|------------------------------------|--------------------------|-----------|------------|------------|-------------------------|-------------------------------|------------------------------------|
|                                | 1 - least deprived n (%) | 2 n (%)    | 3 n (%)    | 4 n (%)     | 5 - most deprived n (%) | Not stated <sup>s</sup> n (%) | 1 - least deprived n (%) | 2 n (%)    | 3 n (%)    | 4 n (%)     | 5 - most deprived n (%) | Not stated <sup>s</sup> n (%) | Chi square                         | 1 - least deprived n (%) | 2 n (%)   | 3 n (%)    | 4 n (%)    | 5 - most deprived n (%) | Not stated <sup>s</sup> n (%) | Chi square                         |
| <b>Total</b>                   | 742 (100)                | 1384 (100) | 3575 (100) | 7073 (100)  | 4033 (100)              | 693 (100)                     | 412 (100)                | 887 (100)  | 2503 (100) | 5476 (100)  | 3204 (100)              | 537 (100)                     |                                    | 330 (100)                | 497 (100) | 1072 (100) | 1597 (100) | 829 (100)               | 156 (100)                     |                                    |
| <b>Diabetes ***</b>            | 62 (8.4)                 | 169 (12.2) | 528 (14.8) | 1201 (17.0) | 698 (17.3)              | 28 (4.0)                      | 49 (11.9)                | 117 (13.2) | 409 (16.3) | 1019 (18.6) | 594 (18.5)              | 20 (3.7)                      | X <sup>2</sup> (4) = 29.7; p<0.001 | 13 (3.9)                 | 52 (10.5) | 119 (11.1) | 182 (11.4) | 104 (12.5)              | 8 (5.1)                       | X <sup>2</sup> (4) = 19.4; p=0.007 |
| <b>Hypertension ***</b>        | 77 (10.4)                | 154 (11.1) | 468 (13.1) | 1189 (16.8) | 627 (15.5)              | 22 (3.2)                      | 51 (12.4)                | 108 (12.2) | 368 (14.7) | 1008 (18.4) | 517 (16.1)              | 18 (3.4)                      | X <sup>2</sup> (4) = 37.8; p<0.001 | 26 (7.9)                 | 46 (9.3)  | 100 (9.3)  | 181 (11.3) | 110 (13.3)              | 4 (2.6)                       | X <sup>2</sup> (4) = 12.3; p=0.17  |
| <b>Asthma ***</b>              | 42 (5.7)                 | 95 (6.9)   | 361 (10.1) | 758 (10.7)  | 432 (10.7)              | 34 (4.9)                      | 27 (6.6)                 | 61 (6.9)   | 251 (10.0) | 589 (10.8)  | 337 (10.5)              | 26 (4.8)                      | X <sup>2</sup> (4) = 19.0; p=0.01  | 15 (4.5)                 | 34 (6.8)  | 110 (10.3) | 169 (10.6) | 95 (11.5)               | 8 (5.1)                       | X <sup>2</sup> (4) = 19.2; p=0.008 |
| <b>Arthritis</b>               | 36 (4.9)                 | 56 (4.0)   | 188 (5.3)  | 411 (5.8)   | 256 (6.3)               | 7 (1.0)                       | 18 (4.4)                 | 36 (4.1)   | 135 (5.4)  | 312 (5.7)   | 197 (6.1)               | 4 (0.7)                       | X <sup>2</sup> (4) = 7.30; p>0.99  | 18 (5.5)                 | 20 (4.0)  | 53 (4.9)   | 99 (6.2)   | 59 (7.1)                | 3 (1.9)                       | X <sup>2</sup> (4) = 7.51; p>0.99  |
| <b>Epilepsy</b>                | 32 (4.3)                 | 50 (3.6)   | 160 (4.5)  | 344 (4.9)   | 202 (5.0)               | 11 (1.2)                      | 24 (5.8)                 | 40 (4.5)   | 123 (4.9)  | 292 (5.3)   | 164 (5.1)               | 9 (1.7)                       | X <sup>2</sup> (4) = 1.79; p>0.99  | 8 (2.4)                  | 10 (2.0)  | 37 (3.5)   | 52 (3.3)   | 38 (4.6)                | 2 (1.3)                       | X <sup>2</sup> (4) = 7.59; p>0.99  |
| <b>CVA</b>                     | 19 (2.6)                 | 52 (3.8)   | 146 (4.1)  | 328 (4.6)   | 180 (4.5)               | 3 (0.4)                       | 12 (2.9)                 | 33 (3.7)   | 107 (4.3)  | 272 (5.0)   | 146 (4.6)               | 3 (0.6)                       | X <sup>2</sup> (4) = 6.55; p>0.99  | 7 (2.1)                  | 19 (3.8)  | 39 (3.6)   | 56 (3.5)   | 34 (4.1)                | 0                             | X <sup>2</sup> (4) = 2.80; p>0.99  |
| <b>Eczema</b>                  | 22 (3.0)                 | 45 (3.3)   | 120 (3.4)  | 273 (3.9)   | 147 (3.6)               | 9 (1.3)                       | 17 (4.1)                 | 34 (3.8)   | 86 (3.4)   | 212 (3.9)   | 123 (3.8)               | 7 (1.3)                       | X <sup>2</sup> (4) = 1.11; p>0.99  | 5 (1.5)                  | 11 (2.2)  | 34 (3.2)   | 61 (3.8)   | 24 (2.9)                | 2 (1.3)                       | X <sup>2</sup> (4) = 6.90; p>0.99  |
| <b>Migraine</b>                | 17 (2.3)                 | 39 (2.8)   | 121 (3.4)  | 243 (3.4)   | 140 (3.5)               | 4 (0.6)                       | 11 (2.7)                 | 20 (2.3)   | 63 (2.5)   | 176 (3.2)   | 99 (3.1)                | 3 (0.6)                       | X <sup>2</sup> (4) = 4.79; p>0.99  | 6 (1.8)                  | 19 (3.8)  | 58 (5.4)   | 67 (4.2)   | 41 (4.9)                | 1 (0.6)                       | X <sup>2</sup> (4) = 8.94; p=0.69  |
| <b>Ischaemic heart disease</b> | 20 (2.7)                 | 48 (3.5)   | 103 (2.9)  | 240 (3.4)   | 143 (3.5)               | 7 (1.0)                       | 9 (2.2)                  | 33 (3.7)   | 74 (3.0)   | 194 (3.5)   | 120 (3.7)               | 5 (0.9)                       | X <sup>2</sup> (4) = 4.99; p>0.99  | 11 (3.3)                 | 15 (3.0)  | 29 (2.7)   | 46 (2.9)   | 23 (2.8)                | 2 (1.3)                       | X <sup>2</sup> (4) = 0.43; p>0.99  |
| <b>COPD **</b>                 | 6 (0.8)                  | 35 (2.5)   | 83 (2.3)   | 208 (2.9)   | 139 (3.4)               | 5 (0.7)                       | 3 (0.7)                  | 22 (2.5)   | 59 (2.4)   | 159 (2.9)   | 95 (3.0)                | 4 (0.7)                       | X <sup>2</sup> (4) = 9.07; p=0.77  | 3 (0.9)                  | 13 (2.6)  | 24 (2.2)   | 49 (3.1)   | 44 (5.3)                | 1 (0.6)                       | X <sup>2</sup> (4) = 21.9; p=0.002 |

|                              |             |             |             |              |             |            |            |             |             |             |             |            |                                        |            |             |             |             |             |            |                                    |
|------------------------------|-------------|-------------|-------------|--------------|-------------|------------|------------|-------------|-------------|-------------|-------------|------------|----------------------------------------|------------|-------------|-------------|-------------|-------------|------------|------------------------------------|
| <b>CKD</b>                   | 8<br>(1.1)  | 22<br>(1.6) | 46<br>(1.3) | 128<br>(1.8) | 74<br>(1.8) | 1<br>(0.1) | 4<br>(1.0) | 9<br>(1.0)  | 28<br>(1.1) | 81<br>(1.5) | 56<br>(1.7) | 1<br>(0.2) | X <sup>2</sup> (4)=<br>5.83;<br>p>0.99 | 4<br>(1.2) | 13<br>(2.6) | 18<br>(1.7) | 47<br>(2.9) | 18<br>(2.2) | 0          | X <sup>2</sup> (4)=6.76;<br>p>0.99 |
| <b>PD</b>                    | 9<br>(1.2)  | 22<br>(1.6) | 51<br>(1.4) | 121<br>(1.7) | 60<br>(1.5) | 3<br>(0.4) | 5<br>(1.2) | 16<br>(1.8) | 33<br>(1.3) | 97<br>(1.8) | 48<br>(1.5) | 2<br>(0.4) | X <sup>2</sup> (4)=<br>3.13;<br>p>0.99 | 4<br>(1.2) | 6<br>(1.2)  | 18<br>(1.7) | 24<br>(1.5) | 12<br>(1.4) | 1<br>(0.6) | ---                                |
| <b>Heart failure</b>         | 10<br>(1.3) | 12<br>(0.9) | 47<br>(1.3) | 92<br>(1.3)  | 58<br>(1.4) | 3<br>(0.4) | 7<br>(1.7) | 10<br>(1.1) | 39<br>(1.6) | 78<br>(1.4) | 52<br>(1.6) | 1<br>(0.2) | X <sup>2</sup> (4)=<br>1.54;<br>p=0.82 | 3<br>(0.9) | 2<br>(0.4)  | 8<br>(0.7)  | 14<br>(0.9) | 6<br>(0.7)  | 2<br>(1.3) | ---                                |
| <b>Psoriasis</b>             | 11<br>(1.5) | 12<br>(0.9) | 33<br>(0.9) | 71<br>(1.0)  | 48<br>(1.2) | 4<br>(0.6) | 4<br>(1.0) | 6<br>(0.7)  | 24<br>(1.0) | 54<br>(1.0) | 37<br>(1.2) | 4<br>(0.7) | ---                                    | 7<br>(2.1) | 6<br>(1.2)  | 9<br>(0.8)  | 17<br>(1.1) | 11<br>(1.3) | 0          | ---                                |
| <b>Atrial fibrillation</b>   | 10<br>(1.3) | 11<br>(0.8) | 27<br>(0.8) | 53<br>(0.7)  | 29<br>(0.7) | 3<br>(0.4) | 6<br>(1.5) | 7<br>(0.8)  | 21<br>(0.8) | 42<br>(0.8) | 23<br>(0.7) | 1<br>(0.2) | ---                                    | 4<br>(1.2) | 4<br>(0.8)  | 6<br>(0.6)  | 11<br>(0.7) | 6<br>(0.7)  | 2<br>(1.3) | ---                                |
| <b>TIA</b>                   | 3<br>(0.3)  | 17<br>(1.0) | 27<br>(0.6) | 55<br>(0.6)  | 28<br>(0.5) | 0          | 1<br>(0.2) | 9<br>(1.0)  | 16<br>(0.6) | 43<br>(0.8) | 22<br>(0.7) | 0          | ---                                    | 2<br>(0.6) | 8<br>(1.6)  | 11<br>(1.0) | 12<br>(0.8) | 6<br>(0.7)  | 0          | ---                                |
| <b>IBD</b>                   | 1<br>(0.1)  | 4<br>(0.3)  | 10<br>(0.3) | 12<br>(0.2)  | 13<br>(0.3) | 0          | 0          | 1<br>(0.1)  | 7<br>(0.3)  | 7<br>(0.1)  | 10<br>(0.3) | 0          | ---                                    | 1<br>(0.3) | 3<br>(0.6)  | 3<br>(0.3)  | 5<br>(0.3)  | 3<br>(0.4)  | 0          | ---                                |
| <b>MS</b>                    | 4<br>(0.5)  | 2<br>(0.1)  | 7<br>(0.2)  | 14<br>(0.2)  | 4<br>(0.1)  | 1<br>(0.1) | 2<br>(0.5) | 2<br>(0.2)  | 2<br>(0.1)  | 9<br>(0.2)  | 3<br>(0.1)  | 1<br>(0.2) | ---                                    | 2<br>(0.6) | 0           | 5<br>(0.5)  | 5<br>(0.3)  | 1<br>(0.1)  | 0          | ---                                |
| <b>Chronic liver disease</b> | 0           | 1<br>(0.1)  | 8<br>(0.2)  | 8<br>(0.1)   | 5<br>(0.1)  | 0          | 0          | 0           | 8<br>(0.3)  | 8<br>(0.1)  | 4<br>(0.1)  | 0          | ---                                    | 0          | 1<br>(0.2)  | 0           | 0           | 1<br>(0.1)  | 0          | ---                                |
| <b>Chronic sinusitis</b>     | 0           | 0           | 1<br>(0.0)  | 2<br>(0.0)   | 3<br>(0.1)  | 0          | 0          | 0           | 1<br>(0.0)  | 2<br>(0.0)  | 3<br>(0.1)  | 0          | ---                                    | 0          | 0           | 0           | 0           | 0           | 0          | ---                                |

\*, p<0.05; \*\*, p<0.01; \*\*\*, p<0.001; CVA, cerebrovascular accident; COPD, chronic obstructive lung disease; CKD, chronic kidney disease; PD, Parkinson's disease; TIA, transient ischemic attack; IBD, inflammatory bowel disease; MS, multiple sclerosis



1  
2  
3  
4  
5  
6  
7  
8  
9  
10  
11  
12  
13  
14  
15  
16  
17  
18  
19  
20  
21  
22  
23  
24  
25  
26  
27  
28  
29  
30  
31  
32  
33  
34  
35  
36  
37  
38  
39  
40  
41  
42  
43  
44  
45  
46  
47  
48  
49  
50  
51  
52  
53  
54  
55  
56  
57  
58  
59  
60

For peer review only

Supplemental Table 6. Sociodemographic features of cohort in HoNOS subsample analysis

|                                         | Total<br>n (%) | SSD<br>n (%) | BD<br>n (%) |
|-----------------------------------------|----------------|--------------|-------------|
| <b>Totals n (%)</b>                     | 13650 (100.0)  | 10384 (76.1) | 3266 (23.9) |
| <b>Sex***</b>                           |                |              |             |
| Female                                  | 6537 (47.9)    | 4526 (69.2)  | 2011 (30.8) |
| Male                                    | 7112 (52.1)    | 5858 (82.4)  | 1254 (17.6) |
| <b>Age at first SMI diagnosis***</b>    |                |              |             |
| 15 – 34                                 | 5821 (42.6)    | 4420 (42.6)  | 1401 (42.9) |
| 35 – 44                                 | 3430 (25.1)    | 2183 (75.3)  | 716 (24.7)  |
| 45 – 54                                 | 2082 (15.3)    | 1594 (76.6)  | 488 (23.4)  |
| 55 – 64                                 | 1089 (8.0)     | 811 (74.5)   | 278 (25.5)  |
| 65+                                     | 1759 (12.9)    | 1376 (13.3)  | 383 (11.7)  |
| <b>Ethnicity***</b>                     |                |              |             |
| White British                           | 4571 (33.5)    | 2961 (64.8)  | 1610 (35.2) |
| Black Caribbean                         | 2849 (20.9)    | 2515 (88.3)  | 334 (11.7)  |
| Black African                           | 1852 (13.6)    | 1679 (90.7)  | 173 (9.3)   |
| South Asian                             | 436 (3.2)      | 338 (77.5)   | 98 (22.5)   |
| Irish                                   | 286 (2.1)      | 197 (68.9)   | 89 (31.1)   |
| Other <sup>§</sup>                      | 3127 (22.9)    | 2327 (74.4)  | 800 (25.6)  |
| Not stated <sup>§</sup>                 | 529 (3.9)      | 367 (3.5)    | 162 (5.0)   |
| <b>Index of multiple deprivation***</b> |                |              |             |
| 1 (least deprivation)                   | 380 (2.8)      | 237 (62.4)   | 143 (37.6)  |
| 2                                       | 883 (6.5)      | 581 (65.8)   | 302 (34.2)  |
| 3                                       | 2786 (20.4)    | 1994 (71.6)  | 792 (28.4)  |
| 4                                       | 5947 (43.6)    | 4654 (78.3)  | 1293 (21.7) |
| 5 (most deprivation)                    | 3308 (24.2)    | 2650 (80.1)  | 658 (19.9)  |
| Unknown <sup>§</sup>                    | 346 (2.5)      | 268 (77.5)   | 78 (22.5)   |
| <b>Physical conditions***</b>           |                |              |             |
| No mentions                             | 7232 (53.0)    | 5320 (73.6)  | 1912 (26.4) |
| One                                     | 3295 (24.1)    | 2596 (78.8)  | 699 (21.2)  |
| Two                                     | 1669 (12.2)    | 1340 (80.3)  | 329 (19.7)  |
| Three or more                           | 1454 (10.7)    | 1128 (77.6)  | 326 (22.4)  |

Note: \*\*\*  $p < .001$  for comparisons between BD and SSD groups. <sup>§</sup>Not included in analyses.

Supplemental Table 7. Associations between comorbidities and HoNOS scores in SSD.

| Comorbidity                     | HoNOS Score  | Unadjusted                  | M1                          | M2a                         |
|---------------------------------|--------------|-----------------------------|-----------------------------|-----------------------------|
|                                 | Mean (SD)    | B (95% CI)                  | B (95% CI)                  | B (95% CI)                  |
| <b>Whole cohort</b>             | 10.75 (6.10) |                             |                             |                             |
| <b>Diabetes</b>                 | 11.04 (6.10) | 0.360<br>(0.067 – 0.654)**  | 0.224<br>(-0.073 – 0.522)   | 0.300<br>(-0.002 – 0.602)   |
| Ref: No diabetes                | 10.68 (6.10) |                             |                             |                             |
| <b>Hypertension</b>             | 11.17 (6.05) | 0.519<br>(0.220 – 0.818)*** | 0.264<br>(-0.048 – 0.575)   | 0.324<br>(0.006 – 0.641)*   |
| Ref: No hypertension            | 10.65 (6.11) |                             |                             |                             |
| <b>Asthma</b>                   | 11.19 (6.11) | 0.492<br>(0.126 – 0.859)**  | 0.551<br>(0.185 – 0.918)**  | 0.530<br>(0.158 – 0.903)**  |
| Ref: No asthma                  | 10.70 (6.10) |                             |                             |                             |
| <b>Arthritis</b>                | 12.08 (6.21) | 1.422<br>(0.948 – 1.895)*** | 1.259<br>(0.775 – 1.742)*** | 1.274<br>(0.788 – 1.759)*** |
| Ref: No arthritis               | 10.66 (6.08) |                             |                             |                             |
| <b>Epilepsy</b>                 | 11.53 (6.24) | 0.827<br>(0.316 – 1.337)*** | 0.850<br>(0.341 – 1.358)*** | 0.856<br>(0.341 – 1.370)*** |
| Ref: No epilepsy                | 10.71 (6.09) |                             |                             |                             |
| <b>CVA</b>                      | 11.87 (6.23) | 1.178<br>(0.651 – 1.705)*** | 0.913<br>(0.383 – 1.443)*** | 0.921<br>(0.388 – 1.454)**  |
| Ref: No CVA                     | 10.69 (6.09) |                             |                             |                             |
| <b>Eczema</b>                   | 11.48 (6.25) | 0.763<br>(0.188 – 1.338)**  | 0.846<br>(0.273 – 1.420)**  | 0.754<br>(0.172 – 1.336)*   |
| Ref: No eczema                  | 10.72 (6.09) |                             |                             |                             |
| <b>Migraine</b>                 | 10.71 (5.87) | -0.041<br>(-0.683 – 0.602)  | 0.196<br>(-0.447 – 0.839)   | 0.192<br>(-0.458 – 0.842)   |
| Ref: No migraine                | 10.75 (6.11) |                             |                             |                             |
| <b>Ischaemic heart disease</b>  | 11.59 (5.91) | 0.874<br>(0.274 – 1.474)**  | 0.520<br>(-0.083 – 1.124)   | 0.477<br>(-0.132 – 1.085)   |
| Ref: No ischaemic heart disease | 10.72 (6.11) |                             |                             |                             |
| <b>COPD</b>                     | 12.15 (5.70) | 1.444<br>(0.760 – 2.128)*** | 1.045<br>(0.354 – 1.736)**  | 1.043<br>(0.343 – 1.742)**  |
| Ref: No COPD                    | 10.71 (6.11) |                             |                             |                             |
| <b>Number of comorbidities</b>  |              | 0.387<br>(0.294 – 0.481)*** | 0.328<br>(0.231 – 0.425)*** | 0.342<br>(0.243 – 0.441)*** |
| <b>1 or more comorbidities</b>  | 11.13 (6.11) | 0.745<br>(0.511 – 0.980)*** | 0.607<br>(0.367 – 0.847)*** | 0.657<br>(0.410 – 0.903)*** |
| Ref: No comorbidities           | 10.39 (6.07) |                             |                             |                             |
| <b>2 or more comorbidities</b>  | 11.45 (6.16) | 0.921<br>(0.646 – 1.196)*** | 0.747<br>(0.464 – 1.030)*** | 0.771<br>(0.484 – 1.059)*** |
| Ref: Less than 1 comorbidities  | 10.53 (6.07) |                             |                             |                             |

Supplemental Table 8. Associations between comorbidities and HoNOS scores in BD.

| Comorbidity                     | HoNOS Score   | Unadjusted                  | M1                          | M2a                         |
|---------------------------------|---------------|-----------------------------|-----------------------------|-----------------------------|
|                                 | Mean (SD)     | B (95% CI)                  | B (95% CI)                  | B (95% CI)                  |
| <b>Whole cohort</b>             | 9.28 (5.77)   |                             |                             |                             |
| <b>Diabetes</b>                 | 10.941 (5.97) | 1.304<br>(0.720 – 1.887)*** | 0.968<br>(0.370 – 1.565)**  | 0.961<br>(0.355 – 1.568)**  |
| Ref: No diabetes                | 9.11 (5.72)   |                             |                             |                             |
| <b>Hypertension</b>             | 10.13 (5.82)  | 0.972<br>(0.384 – 1.561)**  | 0.446<br>(-0.182 – 1.074)   | 0.277<br>(-0.359 – 0.912)   |
| Ref: No hypertension            | 9.15 (5.76)   |                             |                             |                             |
| <b>Asthma</b>                   | 10.61 (6.27)  | 1.512<br>(0.900 – 2.124)*** | 1.597<br>(0.985 – 2.210)*** | 1.503<br>(0.887 – 2.120)*** |
| Ref: No asthma                  | 9.10 (5.68)   |                             |                             |                             |
| <b>Arthritis</b>                | 11.81 (6.13)  | 2.725<br>(1.960 – 3.490)*** | 2.487<br>(1.702 – 3.273)*** | 2.396<br>(1.606 – 3.186)*** |
| Ref: No arthritis               | 9.09 (5.70)   |                             |                             |                             |
| <b>Epilepsy</b>                 | 10.77 (5.96)  | 1.552<br>(0.513 – 2.591)**  | 1.587<br>(0.551 – 2.624)**  | 1.496<br>(0.466 – 2.527)**  |
| Ref: No epilepsy                | 9.22 (5.76)   |                             |                             |                             |
| <b>CVA</b>                      | 11.60 (6.16)  | 2.425<br>(1.464 – 3.386)*** | 2.098<br>(1.124 – 3.071)*** | 2.030<br>(1.064 – 2.996)*** |
| Ref: No CVA                     | 9.17 (5.73)   |                             |                             |                             |
| <b>Eczema</b>                   | 9.83 (5.82)   | 0.578<br>(-0.446 – 1.603)   | 0.622<br>(-0.400 – 1.644)   | 0.427<br>(-0.603 – 1.458)   |
| Ref: No eczema                  | 9.26 (5.77)   |                             |                             |                             |
| <b>Migraine</b>                 | 9.55 (5.34)   | 0.284<br>(-0.586 – 1.154)   | 0.523<br>(-0.350 – 1.397)   | 0.527<br>(-0.346 – 1.400)   |
| Ref: No migraine                | 9.26 (5.80)   |                             |                             |                             |
| <b>Ischaemic heart disease</b>  | 11.84 (5.95)  | 2.649<br>(1.560 – 3.738)*** | 2.093<br>(0.987 – 3.200)*** | 2.204<br>(1.098 – 3.309)**  |
| Ref: No ischaemic heart disease | 9.19 (5.75)   |                             |                             |                             |
| <b>COPD</b>                     | 11.89 (5.99)  | 2.711<br>(1.679 – 3.743)*** | 2.298<br>(1.248 – 3.348)*** | 2.128<br>(1.077 – 3.179)*** |
| Ref: No COPD                    | 9.18 (5.74)   |                             |                             |                             |
| <b>Number of comorbidities</b>  |               | 0.723<br>(0.566 – 0.879)*** | 0.661<br>(0.494 – 0.828)*** | 0.642<br>(0.473 – 0.811)*** |
| <b>1 or more comorbidities</b>  | 10.30 (5.91)  | 1.740<br>(1.343 – 2.138)*** | 1.559<br>(1.143 – 1.974)*** | 1.457<br>(1.031 – 1.883)*** |
| Ref: No comorbidities           | 8.56 (5.57)   |                             |                             |                             |
| <b>2 or more comorbidities</b>  | 10.89 (5.99)  | 2.013<br>(1.524 – 2.503)*** | 1.797<br>(1.280 – 2.314)*** | 1.789<br>(1.267 – 2.311)*** |
| Ref: Less than 1 comorbidities  | 8.88 (5.64)   |                             |                             |                             |

Supplemental Figure 1. Distribution of all conditions in the SMI cohort by SMI diagnoses

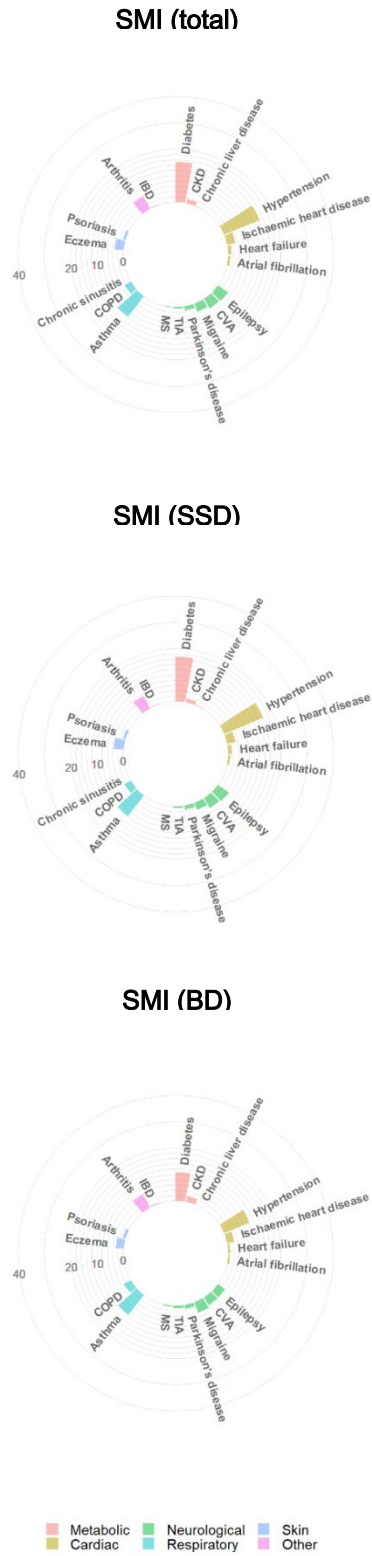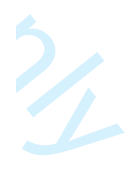

Supplemental Figure 2. Prevalence rates for age at SMI diagnoses per condition and comparison between individuals with BD and SSD.

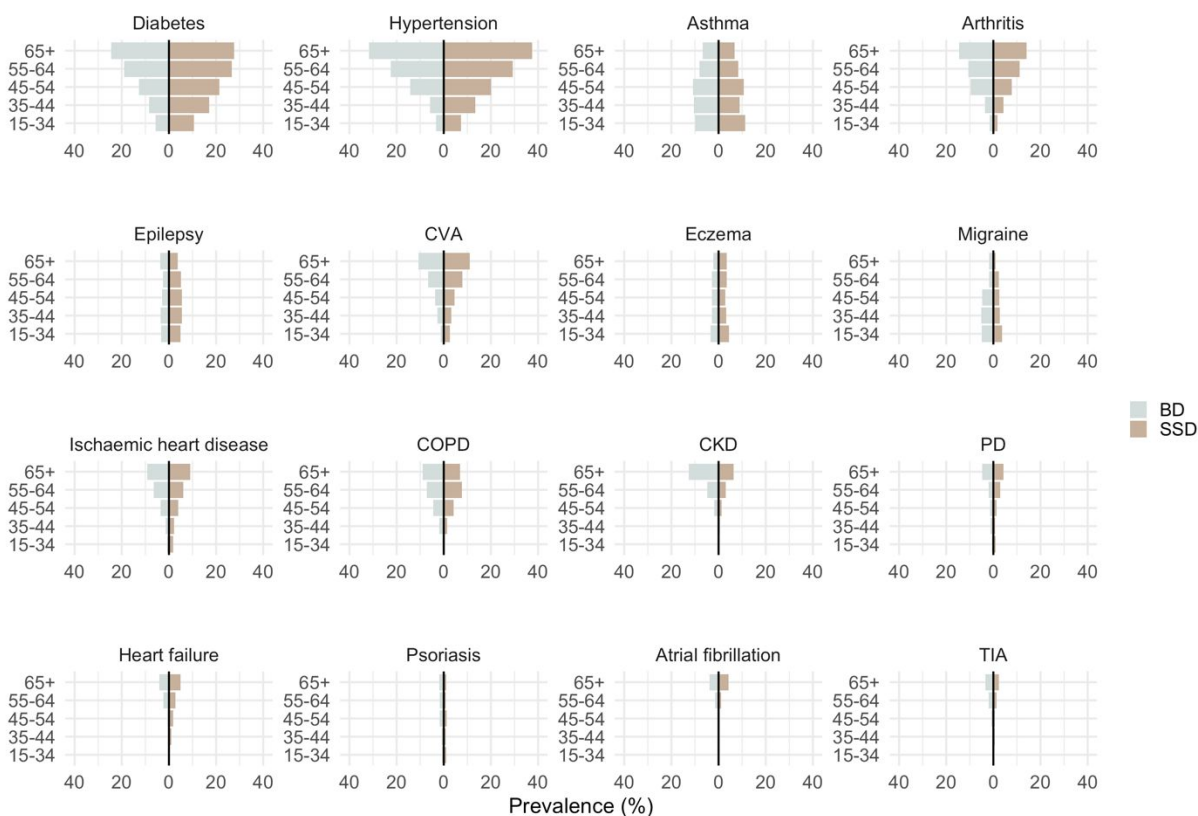

**Appendix 1. SNOMED Container and Concept Level Groupings for physical health conditions included in this study.**

| Container Concept                                                | Concepts                                                                                                                                                                                                                                                                                                                                |
|------------------------------------------------------------------|-----------------------------------------------------------------------------------------------------------------------------------------------------------------------------------------------------------------------------------------------------------------------------------------------------------------------------------------|
| S-73211009 - Diabetes mellitus (disorder)                        | S-44054006 - Diabetes mellitus type 2 (disorder)<br>S-46635009 - Diabetes mellitus type 1 (disorder)<br>S-422088007 - Disorder of nervous system co-occurrent and due to diabetes mellitus (disorder)<br>S-25093002 - Disorder of eye co-occurrent and due to diabetes mellitus (disorder)<br>S-73211009 - Diabetes mellitus (disorder) |
| S-84114007 - Heart failure (disorder)                            | S-128404006 - Right heart failure (disorder)<br>S-48447003 - Chronic heart failure (disorder)<br>S-56675007 - Acute heart failure (disorder)<br>S-85232009 - Left heart failure (disorder)<br>S-42343007 - Congestive heart failure (disorder)<br>S-84114007 - Heart failure (disorder)                                                 |
| S-414545008 - Ischemic heart disease (disorder)                  | S-413439005 - Acute ischemic heart disease (disorder)<br>S-413838009 - Chronic ischemic heart disease (disorder)<br>S-194828000 - Angina (disorder)<br>S-22298006 - Myocardial infarction (disorder)<br>S-414545008 - Ischemic heart disease (disorder)                                                                                 |
| S-38341003 - Hypertensive disorder, systemic arterial (disorder) | S-31992008 - Secondary hypertension (disorder)<br>S-48146000 - Diastolic hypertension (disorder)<br>S-56218007 - Systolic hypertension (disorder)<br>S-59621000 - Essential hypertension (disorder)<br>S-38341003 - Hypertensive disorder, systemic arterial (disorder)                                                                 |
| S-13645005 - Chronic obstructive lung disease (disorder)         | S-195951007 - Acute exacerbation of chronic obstructive airways disease (disorder)<br>S-87433001 - Pulmonary emphysema (disorder)<br>S-13645005 - Chronic obstructive lung disease (disorder)                                                                                                                                           |
| S-195967001 - Asthma (disorder)                                  | S-195967001 - Asthma (disorder)                                                                                                                                                                                                                                                                                                         |
| S-709044004 - Chronic kidney disease (disorder)                  | S-723190009 - Chronic renal insufficiency (disorder)<br>S-709044004 - Chronic kidney disease (disorder)                                                                                                                                                                                                                                 |

|                                                    |                                                                                                                                                                                                                                                                                                                                                                                                       |
|----------------------------------------------------|-------------------------------------------------------------------------------------------------------------------------------------------------------------------------------------------------------------------------------------------------------------------------------------------------------------------------------------------------------------------------------------------------------|
| S-230690007 - Cerebrovascular accident (disorder)  | S-25133001 - Completed stroke (disorder)<br>S-371040005 - Thrombotic stroke (disorder)<br>S-371041009 - Embolic stroke (disorder)<br>S-413102000 - Infarction of basal ganglia (disorder)<br>S-422504002 - Ischemic stroke (disorder)<br>S-723082006 - Silent cerebral infarct (disorder)<br>S-1078001000000105 - Haemorrhagic stroke (disorder)<br>S-230690007 - Cerebrovascular accident (disorder) |
| S-266257000 - Transient ischemic attack (disorder) | S-266257000 - Transient ischemic attack (disorder)                                                                                                                                                                                                                                                                                                                                                    |
| S-49049000 - Parkinson's disease (disorder)        | S-49049000 - Parkinson's disease (disorder)                                                                                                                                                                                                                                                                                                                                                           |
| S-24700007 - Multiple sclerosis (disorder)         | S-24700007 - Multiple sclerosis (disorder)                                                                                                                                                                                                                                                                                                                                                            |
| S-84757009 - Epilepsy (disorder)                   | S-352818000 - Tonic-clonic epilepsy (disorder)<br>S-19598007 - Generalized epilepsy (disorder)<br>S-230456007 - Status epilepticus (disorder)<br>S-509341000000107 - Petit-mal epilepsy (disorder)<br>S-84757009 - Epilepsy (disorder)                                                                                                                                                                |
| S-37796009 - Migraine (disorder)                   | S-37796009 - Migraine (disorder)<br>S-4473006 - Migraine with aura (disorder)<br>S-56097005 - Migraine without aura (disorder)                                                                                                                                                                                                                                                                        |
| S-53741008 - Coronary arteriosclerosis (disorder)  | S-810681000000101 - Coronary microvascular disease (disorder)<br>S-53741008 - Coronary arteriosclerosis (disorder)                                                                                                                                                                                                                                                                                    |
| S-49436004 - Atrial fibrillation (disorder)        | S-49436004 - Atrial fibrillation (disorder)                                                                                                                                                                                                                                                                                                                                                           |
| S-40055000 - Chronic sinusitis (disorder)          | S-40055000 - Chronic sinusitis (disorder)                                                                                                                                                                                                                                                                                                                                                             |
| S-24526004 - Inflammatory bowel disease (disorder) | S-24526004 - Inflammatory bowel disease (disorder)<br>S-397173003 - Crohn's disease of intestine (disorder)<br>S-64766004 - Ulcerative colitis (disorder)                                                                                                                                                                                                                                             |
| S-328383001 - Chronic liver disease (disorder)     | S-328383001 - Chronic liver disease (disorder)<br>S-76783007 - Chronic hepatitis (disorder)<br>S-79720007 - Chronic nonalcoholic liver disease (disorder)                                                                                                                                                                                                                                             |



|                                  |                                                                                                                                                                                                                             |
|----------------------------------|-----------------------------------------------------------------------------------------------------------------------------------------------------------------------------------------------------------------------------|
|                                  | S-713181003 - Chronic alcoholic liver disease (disorder)                                                                                                                                                                    |
| S-9014002 - Psoriasis (disorder) | S-9014002 - Psoriasis (disorder)                                                                                                                                                                                            |
| S-43116000 - Eczema (disorder)   | S-43116000 - Eczema (disorder)                                                                                                                                                                                              |
| S-3723001 - Arthritis (disorder) | S-69896004 - Rheumatoid arthritis (disorder)<br>S-399112009 - Seronegative arthritis (disorder)<br>S-35908007 - Chronic arthritis (disorder)<br>S-11939005 - Acute arthritis (disorder)<br>S-3723001 - Arthritis (disorder) |

## STROBE Statement—checklist of items that should be included in reports of observational studies

|                              | Item No | Recommendation                                                                                                                                                                                                                                                                                                                                                                                                                                                         | Page No |
|------------------------------|---------|------------------------------------------------------------------------------------------------------------------------------------------------------------------------------------------------------------------------------------------------------------------------------------------------------------------------------------------------------------------------------------------------------------------------------------------------------------------------|---------|
| <b>Title and abstract</b>    | 1       | (a) Indicate the study's design with a commonly used term in the title or the abstract                                                                                                                                                                                                                                                                                                                                                                                 | 1       |
|                              |         | (b) Provide in the abstract an informative and balanced summary of what was done and what was found                                                                                                                                                                                                                                                                                                                                                                    | 2       |
| <b>Introduction</b>          |         |                                                                                                                                                                                                                                                                                                                                                                                                                                                                        |         |
| Background/rationale         | 2       | Explain the scientific background and rationale for the investigation being reported                                                                                                                                                                                                                                                                                                                                                                                   | 4,5     |
| Objectives                   | 3       | State specific objectives, including any prespecified hypotheses                                                                                                                                                                                                                                                                                                                                                                                                       | 5       |
| <b>Methods</b>               |         |                                                                                                                                                                                                                                                                                                                                                                                                                                                                        |         |
| Study design                 | 4       | Present key elements of study design early in the paper                                                                                                                                                                                                                                                                                                                                                                                                                | 5,6     |
| Setting                      | 5       | Describe the setting, locations, and relevant dates, including periods of recruitment, exposure, follow-up, and data collection                                                                                                                                                                                                                                                                                                                                        | 5,6     |
| Participants                 | 6       | (a) <i>Cohort study</i> —Give the eligibility criteria, and the sources and methods of selection of participants. Describe methods of follow-up<br><i>Case-control study</i> —Give the eligibility criteria, and the sources and methods of case ascertainment and control selection. Give the rationale for the choice of cases and controls<br><i>Cross-sectional study</i> —Give the eligibility criteria, and the sources and methods of selection of participants | 5       |
|                              |         | (b) <i>Cohort study</i> —For matched studies, give matching criteria and number of exposed and unexposed<br><i>Case-control study</i> —For matched studies, give matching criteria and the number of controls per case                                                                                                                                                                                                                                                 |         |
| Variables                    | 7       | Clearly define all outcomes, exposures, predictors, potential confounders, and effect modifiers. Give diagnostic criteria, if applicable                                                                                                                                                                                                                                                                                                                               | 6-8     |
| Data sources/<br>measurement | 8*      | For each variable of interest, give sources of data and details of methods of assessment (measurement). Describe comparability of assessment methods if there is more than one group                                                                                                                                                                                                                                                                                   | 6-8     |
| Bias                         | 9       | Describe any efforts to address potential sources of bias                                                                                                                                                                                                                                                                                                                                                                                                              | 6-9     |
| Study size                   | 10      | Explain how the study size was arrived at                                                                                                                                                                                                                                                                                                                                                                                                                              | 5,6     |
| Quantitative variables       | 11      | Explain how quantitative variables were handled in the analyses. If applicable, describe which groupings were chosen and why                                                                                                                                                                                                                                                                                                                                           | 6-8     |
| Statistical methods          | 12      | (a) Describe all statistical methods, including those used to control for confounding                                                                                                                                                                                                                                                                                                                                                                                  | 8,9     |
|                              |         | (b) Describe any methods used to examine subgroups and interactions                                                                                                                                                                                                                                                                                                                                                                                                    | 8,9     |
|                              |         | (c) Explain how missing data were addressed                                                                                                                                                                                                                                                                                                                                                                                                                            | 8,9     |
|                              |         | (d) <i>Cohort study</i> —If applicable, explain how loss to follow-up was addressed<br><i>Case-control study</i> —If applicable, explain how matching of cases and controls was addressed<br><i>Cross-sectional study</i> —If applicable, describe analytical methods taking account of sampling strategy                                                                                                                                                              | 8,9     |
|                              |         | (e) Describe any sensitivity analyses                                                                                                                                                                                                                                                                                                                                                                                                                                  | 8,9     |

Continued on next page

1  
2  
3  
4  
5  
6  
7  
8  
9  
10  
11  
12  
13  
14  
15  
16  
17  
18  
19  
20  
21  
22  
23  
24  
25  
26  
27  
28  
29  
30  
31  
32  
33  
34  
35  
36  
37  
38  
39  
40  
41  
42  
43  
44  
45  
46  
47  
48  
49  
50  
51  
52  
53  
54  
55  
56  
57  
58  
59  
60

| <b>Results</b>           |     |                                                                                                                                                                                                                                                                                                                                                                                                               |       |
|--------------------------|-----|---------------------------------------------------------------------------------------------------------------------------------------------------------------------------------------------------------------------------------------------------------------------------------------------------------------------------------------------------------------------------------------------------------------|-------|
| Participants             | 13* | (a) Report numbers of individuals at each stage of study—eg numbers potentially eligible, examined for eligibility, confirmed eligible, included in the study, completing follow-up, and analysed<br>(b) Give reasons for non-participation at each stage<br>(c) Consider use of a flow diagram                                                                                                               | 10    |
| Descriptive data         | 14* | (a) Give characteristics of study participants (eg demographic, clinical, social) and information on exposures and potential confounders<br>(b) Indicate number of participants with missing data for each variable of interest<br>(c) <i>Cohort study</i> —Summarise follow-up time (eg, average and total amount)                                                                                           | 10    |
| Outcome data             | 15* | <i>Cohort study</i> —Report numbers of outcome events or summary measures over time<br><i>Case-control study</i> —Report numbers in each exposure category, or summary measures of exposure<br><i>Cross-sectional study</i> —Report numbers of outcome events or summary measures                                                                                                                             | 9-13  |
| Main results             | 16  | (a) Give unadjusted estimates and, if applicable, confounder-adjusted estimates and their precision (eg, 95% confidence interval). Make clear which confounders were adjusted for and why they were included<br>(b) Report category boundaries when continuous variables were categorized<br>(c) If relevant, consider translating estimates of relative risk into absolute risk for a meaningful time period | 9-13  |
| Other analyses           | 17  | Report other analyses done—eg analyses of subgroups and interactions, and sensitivity analyses                                                                                                                                                                                                                                                                                                                | Supp  |
| <b>Discussion</b>        |     |                                                                                                                                                                                                                                                                                                                                                                                                               |       |
| Key results              | 18  | Summarise key results with reference to study objectives                                                                                                                                                                                                                                                                                                                                                      | 13,14 |
| Limitations              | 19  | Discuss limitations of the study, taking into account sources of potential bias or imprecision. Discuss both direction and magnitude of any potential bias                                                                                                                                                                                                                                                    | 16    |
| Interpretation           | 20  | Give a cautious overall interpretation of results considering objectives, limitations, multiplicity of analyses, results from similar studies, and other relevant evidence                                                                                                                                                                                                                                    | 13-17 |
| Generalisability         | 21  | Discuss the generalisability (external validity) of the study results                                                                                                                                                                                                                                                                                                                                         | 16,17 |
| <b>Other information</b> |     |                                                                                                                                                                                                                                                                                                                                                                                                               |       |
| Funding                  | 22  | Give the source of funding and the role of the funders for the present study and, if applicable, for the original study on which the present article is based                                                                                                                                                                                                                                                 | 18    |

\*Give information separately for cases and controls in case-control studies and, if applicable, for exposed and unexposed groups in cohort and cross-sectional studies.

**Note:** An Explanation and Elaboration article discusses each checklist item and gives methodological background and published examples of transparent reporting. The STROBE checklist is best used in conjunction with this article (freely available on the Web sites of PLoS Medicine at <http://www.plosmedicine.org/>, Annals of Internal Medicine at <http://www.annals.org/>, and Epidemiology at <http://www.epidem.com/>). Information on the STROBE Initiative is available at [www.strobe-statement.org](http://www.strobe-statement.org).

# BMJ Open

## Mapping Multimorbidity in Individuals with Schizophrenia and Bipolar Disorders: Evidence from the South London and Maudsley NHS Foundation Trust Biomedical Research Centre (SLAM BRC) Case Register

|                               |                                                                                                                                                                                                                                                                                                                                                                                                                                                                                                                                                                                                                                                                                                                                                                                                                                                                                                                                                                                                                                                                                                                                                                                                                                                                                                                                                                                                                                                                                                                                                                                                                                                                                                                                                                                                                                                                                                                                                                                                                                                                                                                                                                                                                                                                                                                                                             |
|-------------------------------|-------------------------------------------------------------------------------------------------------------------------------------------------------------------------------------------------------------------------------------------------------------------------------------------------------------------------------------------------------------------------------------------------------------------------------------------------------------------------------------------------------------------------------------------------------------------------------------------------------------------------------------------------------------------------------------------------------------------------------------------------------------------------------------------------------------------------------------------------------------------------------------------------------------------------------------------------------------------------------------------------------------------------------------------------------------------------------------------------------------------------------------------------------------------------------------------------------------------------------------------------------------------------------------------------------------------------------------------------------------------------------------------------------------------------------------------------------------------------------------------------------------------------------------------------------------------------------------------------------------------------------------------------------------------------------------------------------------------------------------------------------------------------------------------------------------------------------------------------------------------------------------------------------------------------------------------------------------------------------------------------------------------------------------------------------------------------------------------------------------------------------------------------------------------------------------------------------------------------------------------------------------------------------------------------------------------------------------------------------------|
| Journal:                      | <i>BMJ Open</i>                                                                                                                                                                                                                                                                                                                                                                                                                                                                                                                                                                                                                                                                                                                                                                                                                                                                                                                                                                                                                                                                                                                                                                                                                                                                                                                                                                                                                                                                                                                                                                                                                                                                                                                                                                                                                                                                                                                                                                                                                                                                                                                                                                                                                                                                                                                                             |
| Manuscript ID                 | bmjopen-2021-054414.R1                                                                                                                                                                                                                                                                                                                                                                                                                                                                                                                                                                                                                                                                                                                                                                                                                                                                                                                                                                                                                                                                                                                                                                                                                                                                                                                                                                                                                                                                                                                                                                                                                                                                                                                                                                                                                                                                                                                                                                                                                                                                                                                                                                                                                                                                                                                                      |
| Article Type:                 | Original research                                                                                                                                                                                                                                                                                                                                                                                                                                                                                                                                                                                                                                                                                                                                                                                                                                                                                                                                                                                                                                                                                                                                                                                                                                                                                                                                                                                                                                                                                                                                                                                                                                                                                                                                                                                                                                                                                                                                                                                                                                                                                                                                                                                                                                                                                                                                           |
| Date Submitted by the Author: | 16-Sep-2021                                                                                                                                                                                                                                                                                                                                                                                                                                                                                                                                                                                                                                                                                                                                                                                                                                                                                                                                                                                                                                                                                                                                                                                                                                                                                                                                                                                                                                                                                                                                                                                                                                                                                                                                                                                                                                                                                                                                                                                                                                                                                                                                                                                                                                                                                                                                                 |
| Complete List of Authors:     | <p>Bendayan, Rebecca; King's College London, Biostatistics and Health Informatics, Institute of Psychiatry, Psychology and Neurosciences; NIHR Biomedical Research Centre at South London and Maudsley NHS Foundation Trust and King's College London, London, United Kingdom</p> <p>Kraljevic, Zeljko; King's College London, Biostatistics and Health Informatics, Institute of Psychiatry, Psychology and Neuroscience</p> <p>Shaari, Shaweena; NIHR Biomedical Research Centre at South London and Maudsley NHS Foundation Trust and King's College London, London, United Kingdom</p> <p>Das-Munshi, Jayati; King's College London Institute of Psychiatry Psychology and Neuroscience, Psychological Medicine</p> <p>Leipold, Leona; NIHR Biomedical Research Centre at South London and Maudsley NHS Foundation Trust and King's College London, London, United Kingdom</p> <p>Chaturvedi, Jaya; King's College London, Biostatistics and Health Informatics, Institute of Psychiatry, Psychology and Neuroscience</p> <p>Mirza, Luwaiza; NIHR Biomedical Research Centre at South London and Maudsley NHS Foundation Trust and King's College London, London, United Kingdom</p> <p>Aldelemi, Sarah; NIHR Biomedical Research Centre at South London and Maudsley NHS Foundation Trust and King's College London, London, United Kingdom</p> <p>Searle, Thomas; King's College London, Department of Biostatistics and Health Informatics</p> <p>Chance, Natalia; NIHR Biomedical Research Centre at South London and Maudsley NHS Foundation Trust and King's College London, London, United Kingdom</p> <p>Mascio, Aurelie; King's College London, Biostatistics and Health Informatics, Institute of Psychiatry, Psychology and Neuroscience</p> <p>Skiada, Naoko; King's College London, Biostatistics and Health Informatics, Institute of Psychiatry, Psychology and Neuroscience</p> <p>Wang, Tao; Department of Biostatistics and Health Informatics, Institute of Psychiatry, Psychology and Neuroscience, King's College London, London, United Kingdom</p> <p>Roberts, Angus; King's College London, Biostatistics and Health Informatics, Institute of Psychiatry, Psychology and Neuroscience; NIHR Biomedical Research Centre at South London and Maudsley NHS Foundation Trust and King's College London, London, United Kingdom</p> |

|                                  |                                                                                                                                                                                                                                                                                                                             |
|----------------------------------|-----------------------------------------------------------------------------------------------------------------------------------------------------------------------------------------------------------------------------------------------------------------------------------------------------------------------------|
|                                  | Stewart, Robert; King's College London, Psychological Medicine; NIHR Biomedical Research Centre at South London and Maudsley NHS Foundation Trust and King's College London, London, United Kingdom<br>Bean, Daniel; King's College London, Biostatistics and Health Informatics<br>Dobson, Richard; King's College London, |
| <b>Primary Subject Heading</b> : | Mental health                                                                                                                                                                                                                                                                                                               |
| Secondary Subject Heading:       | Public health, Epidemiology, Health informatics                                                                                                                                                                                                                                                                             |
| Keywords:                        | Health informatics < BIOTECHNOLOGY & BIOINFORMATICS, EPIDEMIOLOGY, MENTAL HEALTH, PSYCHIATRY, PUBLIC HEALTH                                                                                                                                                                                                                 |
|                                  |                                                                                                                                                                                                                                                                                                                             |

SCHOLARONE™  
Manuscripts



I, the Submitting Author has the right to grant and does grant on behalf of all authors of the Work (as defined in the below author licence), an exclusive licence and/or a non-exclusive licence for contributions from authors who are: i) UK Crown employees; ii) where BMJ has agreed a CC-BY licence shall apply, and/or iii) in accordance with the terms applicable for US Federal Government officers or employees acting as part of their official duties; on a worldwide, perpetual, irrevocable, royalty-free basis to BMJ Publishing Group Ltd ("BMJ") its licensees and where the relevant Journal is co-owned by BMJ to the co-owners of the Journal, to publish the Work in this journal and any other BMJ products and to exploit all rights, as set out in our [licence](#).

The Submitting Author accepts and understands that any supply made under these terms is made by BMJ to the Submitting Author unless you are acting as an employee on behalf of your employer or a postgraduate student of an affiliated institution which is paying any applicable article publishing charge ("APC") for Open Access articles. Where the Submitting Author wishes to make the Work available on an Open Access basis (and intends to pay the relevant APC), the terms of reuse of such Open Access shall be governed by a Creative Commons licence – details of these licences and which [Creative Commons](#) licence will apply to this Work are set out in our licence referred to above.

Other than as permitted in any relevant BMJ Author's Self Archiving Policies, I confirm this Work has not been accepted for publication elsewhere, is not being considered for publication elsewhere and does not duplicate material already published. I confirm all authors consent to publication of this Work and authorise the granting of this licence.

1  
2  
3 **Mapping Multimorbidity in Individuals with Schizophrenia and Bipolar Disorders:**  
4  
5 **Evidence from the South London and Maudsley NHS Foundation Trust Biomedical**  
6  
7 **Research Centre (SLAM BRC) Case Register**  
8  
9

10 Rebecca Bendayan<sup>1,2</sup>, Zeljko Kraljevic<sup>2</sup>, Shaweena Shaari<sup>1</sup>, Jayati Das-Munshi<sup>3</sup>, Leona Leipold<sup>1</sup>,  
11  
12 Jaya Chaturvedi<sup>2</sup>, Luwaiza Mirza<sup>1</sup>, Sarah Aldelemi<sup>1</sup>, Thomas Searle<sup>2</sup>, Natalia Chance<sup>1</sup>, Aurelie  
13  
14 Mascio<sup>2</sup>, Naoko Skiada<sup>2</sup>, Tao Wang<sup>2</sup>, Angus Roberts<sup>1,2</sup>, Robert Stewart<sup>1,3</sup>, Daniel Bean<sup>2,4</sup>, Richard  
15  
16 Dobson<sup>1,2,5</sup>  
17  
18

19  
20 <sup>1</sup>NIHR Biomedical Research Centre at South London and Maudsley NHS Foundation Trust,  
21 London, United Kingdom  
22  
23

24 <sup>2</sup>Department of Biostatistics and Health Informatics, Institute of Psychiatry, Psychology and  
25 Neuroscience, King's College London, London, United Kingdom  
26

27 <sup>3</sup>Department of Psychological Medicine, Institute of Psychiatry, Psychology and Neuroscience,  
28 King's College London, London, United Kingdom  
29

30 <sup>4</sup>Health Data Research UK London, University College London, London, United Kingdom  
31  
32

33 <sup>5</sup>Institute of Health Informatics, University College London, London, United Kingdom  
34

35 **Word count: 3920**  
36  
37

38 **Correspondence:**

39 Rebecca Bendayan / ORCID: 0000-0003-1461-556X

40 E-mail: [rebecca.bendayan@kcl.ac.uk](mailto:rebecca.bendayan@kcl.ac.uk)

41 NIHR Maudsley Biomedical Research Centre

42 Department of Biostatistics & Health Informatics

43 SGDP Centre, IoPPN, Box PO 80

44 De Crespigny Park, Denmark Hill

45 London SE5 8AF, UNITED KINGDOM  
46  
47  
48  
49  
50  
51  
52  
53  
54  
55  
56  
57  
58  
59  
60

## Abstract

**Objectives:** The first aim of this study was to design and develop a valid and replicable strategy to extract physical health conditions from clinical notes which are common in mental health services. Then, we examined the prevalence of these conditions in individuals with SMI and compared their individual and combined prevalence in individuals with bipolar (BD) and schizophrenia spectrum disorders (SSD).

**Design:** Observational study.

**Setting:** Secondary mental healthcare services from South London

**Participants:** Our maximal sample comprised 17,500 individuals aged 15 years or older who had received a primary or secondary SMI diagnosis (ICD-10, F20-31) between 2007 and 2018.

**Measures:** We designed and implemented a data extraction strategy for 21 common physical comorbidities using a natural language processing pipeline, MedCAT. Associations were investigated with sex, age at SMI diagnosis, ethnicity and social deprivation for the whole cohort and the BD and SSD subgroups. Linear regression models were used to examine associations with disability measured by the Health of Nations Outcome Scale (HoNOS).

**Results:** Physical health data was extracted, achieving precision rates (F1) above 0.90 for all conditions. The ten most prevalent conditions were diabetes, hypertension, asthma, arthritis, epilepsy, cerebrovascular accident, eczema, migraine, ischaemic heart disease and COPD. The most prevalent combination in this population included diabetes, hypertension and asthma, regardless of their SMI diagnoses.

**Conclusions:** Our data extraction strategy was found to be adequate to extract physical health data from clinical notes, which is essential for future multimorbidity research using text records. We found that around 40% of our cohort had multimorbidity from which 20% had complex



1  
2  
3 multimorbidity (two or more physical conditions besides SMI). Sex, age, ethnicity and social  
4  
5 deprivation were found to be key to understand their heterogeneity and their differential  
6  
7 contribution to disability levels in this population. These outputs have direct implications for  
8  
9 researchers and clinicians.  
10

### 11 **Strengths and limitations of this study**

- 14 - We designed and implemented a data extraction strategy with good which showed high  
15 performance rates and allowed us to unlock data from 21 physical health conditions from  
16 around 15m clinical documents with free text.
- 17 - We mapped how these health conditions are distributed across sex, age, ethnicity, social  
18 disadvantage and severe mental illness diagnoses in a sample of 17500 patients from one  
19 of Europe's largest providers of secondary mental healthcare, serving a geographic  
20 catchment of approximately 1.32 million residents in London.
- 21 - The association between multimorbidity (2 or more conditions) and disability was  
22 examined. Further research is needed to understand potential explanatory pathways for the  
23 association between multimorbidity and disability in this population.
- 24 - This study focuses on a cohort of individuals with SMI which limits direct comparisons  
25 with other mental health conditions and/or general population.
- 26 - Although some of the most frequent physical comorbidities were extracted, some specific  
27 health conditions required to compute standard comorbidity scores (e.g., Charlson and  
28 Exlihauser comorbidity indexes) were not included in this study.

## Introduction

Two thirds of the deaths in individuals with severe mental illness (SMI) are potentially explained by the increased risk of multimorbidity in this population.[1–4] However, multimorbidity research in this population is still scarce[5] compounded by the limited availability of physical health data in SMI samples, increased non-response rates in surveys,[6] and physical health information in secondary mental health care data primarily hidden in free text fields.

Most research to date on physical health in SMI populations has focused on cardiometabolic risk factors which are considered leading contributors to cardiovascular diseases in individuals with SMI,[7–10] or specific conditions such as immune-mediated inflammatory diseases (e.g., inflammatory bowel diseases, psoriasis),[11–13] multiple sclerosis, epilepsy or migraine.[14,15] This condition-specific vision limits our understanding of multimorbidity in SMI and studies that consider a larger number of conditions are needed. However, there are only a few studies which have considered multiple health conditions.[4,16,17] Woodhead et al.[4] showed an increased risk in multimorbidity in SMI patients, but only found epilepsy to be more prevalent as an individual condition. Kugathasan et al.[17] investigated combinations of diseases in schizophrenia at organ system level and found that 31% had complex multimorbidity with the most prevalent pairs including neurologic-endocrine, neurologic-respiratory and neurologic-viral. Similarly, epilepsy and arthritis was one of the most prevalent combinations found by Dorrington et al.[16] Although these studies included multiple health conditions and confirmed the need of investigating further multimorbidity in SMI, they are still not comparable to multimorbidity studies in general populations[18–20] and did not investigate potential differences between individuals with schizophrenia spectrum disorders (SSD) and bipolar disorders (BD). Understanding different multimorbidity combinations between those groups could contribute to the ongoing debate around

1  
2  
3 potential underlying biological mechanisms.[21–23] Ultimately, SSD and BD have been  
4 established as significant drivers of disability[24] and deficits in physical health have been  
5 implicated in the perpetuation of impairments in functional capacity and performance,[25,26]  
6  
7 however, research into the relationship between multimorbidity and disability in SMI is limited.  
8  
9 Within this context, our first aim was to design and develop a suitable strategy to extract  
10 information on physical health conditions from free text mental health records data which could  
11 be easily replicated in future multimorbidity research using similar resources. Our second objective  
12 was to examine the prevalence of these conditions and their most prevalent combinations in SMI  
13 and any differences across relevant sociodemographic factors and across SMI diagnoses (SSD vs  
14 BD). Our third objective was to investigate the association of overall multimorbidity and specific  
15 physical health conditions with levels of disability measured using the Health of the Nation  
16 Outcome Scales (HoNOS).  
17  
18  
19  
20  
21  
22  
23  
24  
25  
26  
27  
28  
29

## 30 **Methods**

### 31 *Setting and sample*

32  
33 Patient data were extracted via the Clinical Record Interactive Search (CRIS), a case register  
34 platform that contains de-identified mental healthcare electronic health record data from the South  
35 London and Maudsley Trust NHS Foundation Trust (SLaM). SLaM is one of Europe's largest  
36 providers of secondary mental healthcare, serving a geographic catchment of approximately 1.32  
37 million residents, and providing almost complete coverage of secondary mental healthcare  
38 provision to all age groups. Since 2007, fully electronic clinical records have been deployed in  
39 SLaM, and data from these are accessible via CRIS system which allows searching and retrieval  
40 of anonymized full records for over 500,000 cases currently represented in the system.[27]  
41  
42  
43  
44  
45  
46  
47  
48  
49  
50  
51  
52  
53  
54  
55  
56  
57  
58  
59  
60

1  
2  
3 Our sample (N=17500) consisted of all individuals aged 15 years or older who had received a  
4 primary or secondary SMI diagnosis between 2007 and 2018 (International Classification of  
5 Mental and Behavioural Disorders 10<sup>th</sup> edition [ICD-10][28] codes F20-31). As one of our  
6 objectives was to compare SSD (F20-29) and BD (F30-31), individuals who over those 10 years  
7 of follow-up had diagnoses within both categories were excluded (n=804). Excluded individuals  
8 were more likely to be female, under the age of 35 at first SMI diagnosis recorded, Black ethnicity  
9 and have higher levels of social deprivation.  
10  
11  
12  
13  
14  
15  
16  
17  
18

### 19 *Physical health conditions*

20  
21 *Definitions and Information extraction.* To maximise comparability we sought to extract the  
22 following 21 physical health conditions representing chronic conditions commonly collected in  
23 multimorbidity studies using primary care data:[18–20] diabetes mellitus, heart failure, ischemic  
24 heart diseases, hypertension, coronary arteriosclerosis, chronic obstructive pulmonary disease  
25 (COPD), asthma, chronic kidney disease, cerebrovascular accident, transient ischemic attack,  
26 Parkinson's disease, multiple sclerosis, epilepsy, migraine, atrial fibrillation, chronic sinusitis,  
27 inflammatory bowel disease, chronic liver diseases, psoriasis, eczema and arthritis. These were  
28 mapped to SNOMED codes where the top concept was the group identifier and then all direct  
29 children of that concept were examined and individually reviewed by two clinicians (Appendix 1).  
30  
31  
32  
33  
34  
35  
36  
37  
38  
39  
40  
41  
42  
43  
44  
45  
46  
47  
48  
49  
50  
51  
52  
53  
54  
55  
56  
57  
58  
59  
60  
Physical health conditions were ascertained from data reported in text records from CRIS since  
2007 until 1st August 2019 for each individual resulting in around 15m documents.

To extract SNOMED concepts from the free text we used MedCAT,[29] a medical concept  
annotation toolkit capable of named entity recognition linking (NER+L) with contextualization.  
The base model used is described in Kraljevic et al.,[29] and has shown very good performance  
(F1=0.90). In a first step, the base model was enriched with concept names from UMLS with the

1  
2  
3 purpose of increasing recall and potentially catching all different name-forms for each concept. In  
4  
5 a second step, to increase precision, MedCAT was trained in an unsupervised fashion on all the  
6  
7 available documents; and in a third step, all the free text was annotated for the chosen SNOMED  
8  
9 concepts. For each condition, 300 documents were randomly extracted, which resulted in a total  
10  
11 of 6300 annotated documents.  
12  
13

14 *Annotation of physical health conditions.* To ensure consistent, high-quality gold standard and  
15  
16 training data, we developed annotation guidelines based on series of iterative discussions including  
17  
18 clinical and technical expertise. These guidelines, available upon request, were piloted and refined  
19  
20 in preliminary stages. A relevant instance was defined as a mention of a physical health condition  
21  
22 experienced by the patient and not negated. Each MedCAT detection was first validated as either  
23  
24 correct/wrong - meaning the portion of text that was detected by MedCAT was either a  
25  
26 correct/wrong detection of the relevant concept. Correct detections were further annotated with  
27  
28 contextual annotations (or meta-annotations) for 'Diagnosis' and 'Status'. Diagnosis was used to  
29  
30 determine if the detected concept is a patient related diagnosis, and Status if the detected concept  
31  
32 is affirmed. Eight annotators were trained for this task and given the same  
33  
34 instructions. MedCATtrainer[30] was used to facilitate manual annotations and each document  
35  
36 was double annotated. Disagreements between annotators were further evaluated and resolved by  
37  
38 a third annotator.  
39  
40  
41  
42  
43

44 *Training and validation.* Once the dataset was annotated it was split into a training and validation  
45  
46 set. For NER+L, 70% of the dataset was used for training and 30% for validation. For meta-  
47  
48 annotations, 80% was used for training and 20% for validation. Hyperparameter optimization in  
49  
50 both cases used a 10-fold cross validation on the training set.  
51  
52  
53  
54  
55  
56  
57  
58  
59  
60

1  
2  
3 *Socio-demographics.* Extracted data included sex, age at SMI diagnosis (15-24, 25-34, 35-44, 45-  
4 54, 55-64, 65-74, 75+), and ethnicity (White British, Irish, Black Caribbean (including mixed  
5 White and Black Caribbean and any other Black background), Black African (including mixed  
6 White and Black African), South Asian (Indian, Pakistani and Bangladeshi) and Other). Index of  
7 Multiple Deprivation (IMD) was extracted as a measure of neighbourhood socioeconomic status  
8 at the level of the 2011 Lower Layer Super Output Area (LSOA11; a standard postal unit with an  
9 average 1500 residents) corresponding to the individual's address at time of SMI diagnosis. Using  
10 the IMD, each LSOA11 is ranked from 1 (most deprived) to 32,844 (least deprived) based on seven  
11 Census-derived indicators, which was subsequently divided into quintiles.[31]

12  
13  
14  
15  
16  
17  
18  
19  
20  
21  
22  
23  
24 *Disability.* Disability was measured using Health of the Nation Outcome Scales (HoNOS):[32] a  
25 clinician-rated tool developed to measure health and social functioning. It includes 12 subscales:  
26 agitated behaviour; non-accidental self-injury; problem drinking or drug taking; cognitive  
27 problems; physical illness problems; problems associated with hallucinations or delusions;  
28 problems associated with depression; other mental and behaviour problems; problems with  
29 relationships; problems with activities of daily living; problems with living conditions; and  
30 problems with occupation and activities.[32] Total adjusted HoNOS scores of individuals at the  
31 first SMI diagnosis recorded in CRIS, or closest to that time, were used in this study. Higher scores  
32 for HoNOS indicate higher levels of impairment in the individual's functioning.

### 33 *Statistical Analyses*

34  
35  
36  
37  
38  
39  
40  
41  
42  
43  
44  
45  
46  
47 To explore the suitability of MedCAT for extracting these physical health conditions from this  
48 cohort (objective 1), inter-rater agreement estimates were computed and performance, precision  
49 and recall per condition were estimated.  
50  
51  
52  
53  
54  
55  
56  
57  
58  
59  
60

1  
2  
3 To examine the prevalence of these conditions in SMI across relevant factors and compare the  
4 most prevalent multimorbidity combinations for individuals with BD and SSD (objective 2).  
5  
6 Descriptive statistics were derived for all the variables. Chi-square tests and Fisher's exact tests,  
7  
8 with Bonferroni correction for multiple comparisons, were performed to explore associations with  
9  
10 covariates differences between BD and SSD.  
11  
12

13  
14 To address our third objective (to investigate the association of multimorbidity and specific  
15 physical health with levels of disability), we performed series of hierarchical linear regressions.  
16  
17 Models were adjusted by age and sex (Model 1), and then additionally adjusted by IMD (Model  
18  
19 2a) or SMI diagnosis (Model 2b). All analyses were performed using R 4.0.3 and RStudio  
20  
21 1.3.1093.  
22  
23  
24

#### 25 26 *Patient and Public Involvement Statement*

27  
28 When designing this project, the Data Linkage Service User and Carer Advisory Group was  
29  
30 consulted and followed up presenting preliminary results. This is a well-established Patient and  
31  
32 Public Involvement Group set up by the Biomedical Research Center (BRC) at South London and  
33  
34 Maudsley Trust NHS Foundation Trust (SLaM).[33]  
35  
36

#### 37 38 **Results**

##### 39 40 *Inter-annotator agreement and model validation for data extraction*

41  
42 For each physical health condition, 300 documents were annotated to create a gold standard and  
43  
44 training data specific to each condition. All 6300 instances across 21 health conditions were double  
45  
46 annotated yielding an average inter-annotator agreement of 97% for NER+L, 82.70% for the meta-  
47  
48 annotation Diagnosis and 78.08% for the meta-annotation Status. Precision, recall and F1 metrics  
49  
50 of each modelled physical health condition are shown in Table 1. Coronary arteriosclerosis was  
51  
52 not extracted as the number of positive mentions was too small for training and validation. Overall  
53  
54  
55  
56  
57  
58  
59  
60

1  
2  
3 meta-annotations performance results showed good performance for Diagnosis and Status  
4  
5 (Supplemental Table 1).  
6

7  
8 PLEASE INSERT TABLE 1  
9

10 *Mapping of physical health conditions and comparison between SSD and BD*

11  
12 Our sample consisted of 17,500 individuals with SMI, of whom 74.4% were diagnosed with SSD  
13  
14 and 25.6% with BD. A slight majority were male (53.6%), and most individuals had their first SMI  
15  
16 diagnoses report under the age of 35 (42.8%). The White British group accounted for 35.7%, with  
17  
18 Black Caribbean (18.2%) and Black African (12.0%) groups being the next two largest groups and  
19  
20 South Asian and Irish groups were the smallest, with 3.1 and 2.0% respectively (Table 2). There  
21  
22 were high levels of deprivation in the cohort, with over 60% falling into the lowest two national  
23  
24 quintiles. Around 40% had at least one mention of a physical health condition and around 20%  
25  
26 had two or more physical conditions. There were significant differences between BD and SSD for  
27  
28 most of the socio-demographic characteristics and number of physical health conditions (Table 2  
29  
30 and Figure 1). Individuals with SSD were more likely to be men, from ethnic minorities, living in  
31  
32 more deprived neighbourhoods and had a higher number of physical health conditions recorded  
33  
34 compared those with BD.  
35  
36  
37  
38  
39

40 The three most common physical health conditions recorded were diabetes, hypertension and  
41  
42 asthma (15.3%, 14.5% and 9.8% respectively), regardless of the specific SMI diagnoses  
43  
44 (Supplemental Figure 1 within SSD and BD). When we compared individuals with SSD and BD,  
45  
46 we found that the top 10 most prevalent health conditions were similar between groups but diabetes  
47  
48 (SSD 17% vs BD 10.7%), hypertension (SSD 15.9% vs BD 10.4%) and epilepsy (SSD 5.0% vs  
49  
50 BD 3.3%) prevalence rates were slightly higher for individuals with SSD while individuals with  
51  
52 BD showed higher prevalence rates of migraine (BD 4.3% vs SSD 2.9%).  
53  
54  
55  
56  
57  
58  
59  
60



## PLEASE INSERT TABLE 2 AND FIGURE 1 HERE

When we explored differences by sex in the whole cohort, we found that women were more likely to report hypertension, asthma, arthritis, eczema, and migraine compared to men (Supplemental Table 2). Within the individuals with SSD, women were in addition found to be more likely to report higher rates of diabetes, chronic kidney disease (CKD), heart failure and transient ischaemic attack (TIA). Within individuals with BD, sex differences were only found for asthma, arthritis, migraine and ischemic heart disease. Women with BD were more likely to report asthma, arthritis and migraine while men with BD were more likely to report ischemic heart disease.

With regards to differences across age groups, we found higher prevalence rates of diabetes, hypertension, arthritis, cerebrovascular accident, ischaemic heart disease, COPD, CKD, Parkinson's disease, heart failure, atrial fibrillation and TIA in individuals in older age ranges, while asthma and migraine were more prevalent in those in younger age ranges (Supplemental Table 3, Supplemental Figure 2). Similar results within individuals with SSD and BD (except for asthma and cerebrovascular accident in BD).

We found differences for ethnicity in individuals with diabetes, hypertension, asthma, arthritis, epilepsy, eczema, ischaemic heart disease, COPD and cerebrovascular accident (Figure 2, Supplemental Tables 4). Individuals from Black or South Asian minorities were more likely to show higher prevalence rates of diabetes and hypertension compared to those White British or Irish. Black Caribbean showed the higher prevalence rates of asthma or eczema among all other groups. Arthritis, COPD, epilepsy and IHD seem to be slightly more prevalent in White British or Irish, with epilepsy showing the highest prevalence rates among Irish. Similar trends were found within SSD and BD subgroups with diabetes rates higher in South Asians with BD (29.7%) compared to South Asians with SSD (20.7%); while diabetes rates in Black Caribbean with SSD

1  
2  
3 (24.4%) were higher than in those with BD (19.6%). With regards to social deprivation, we found  
4 that individuals with diabetes, hypertension, asthma, and COPD were more likely to be higher  
5 levels of deprivation compared to those that did not have these specific conditions (Supplemental  
6  
7  
8  
9  
10 Table 5).

11  
12 PLEASE INSERT FIGURE 2 AROUND HERE

13  
14  
15 *Multimorbidity combinations for the whole cohort and SSD and BD subgroups*

16  
17 Table 3 summarizes the ten most common physical comorbidities in patients with SMI, their  
18 prevalence, the mean number of comorbidities, and the three most frequently associated  
19 comorbidities, for the total cohort and by SMI diagnosis. While there were no clear differences in  
20 comorbidities, for the total cohort and by SMI diagnosis. While there were no clear differences in  
21 the mean number of comorbidities by SMI diagnosis, the presence of one physical condition  
22 predisposed individuals to at least one other condition; the mean number of comorbidities in the  
23 total cohort was 0.74, jumping to at least 2.20 in the presence of one of the ten most common  
24 comorbidities. The three most commonly associated physical comorbidities remained relatively  
25 consistent by SMI diagnosis, with a few exceptions. The prevalence of associated comorbidities  
26 with epilepsy are lower in BD than SSD, a fairly different comorbidity profile in migraine between  
27 SMI diagnoses and a lower rate of diabetes in individuals with comorbid BD and COPD (when  
28 compared to SSD). The most common combination of conditions included diabetes, hypertension  
29 and asthma, regardless of their SMI diagnoses. Most individuals with these combinations of  
30 conditions were also likely to have arthritis. Figures 3, 4 and 5 show the most prevalent conditions  
31 for individuals with SMI and comorbid diabetes, hypertension and asthma, respectively.  
32  
33  
34  
35  
36  
37  
38  
39  
40  
41  
42  
43  
44  
45  
46  
47  
48

49 PLEASE INSERT TABLE 3 AND FIGURES 3,4 AND 5 AROUND HERE

50  
51 *Association with disability*

1  
2  
3 HoNOS descriptive statistics for the whole SMI cohort (Mean=10.40, SD=6.06) and the ten most  
4  
5 common physical comorbidities are shown in Table 4. Regression analyses showed that  
6  
7 individuals with any of these conditions (except migraine) showed higher HoNOS scores, even  
8  
9 after adjustments for age, sex, IMD or SMI diagnoses. We also examined whether simple and  
10  
11 complex multimorbidity was also associated with HoNOS total score and we found that a strong  
12  
13 positive association minimally attenuated after adjustments. Similar socio-demographics and  
14  
15 trends were found within BD and SSD groups (Supplemental Tables 6-8). However, associations  
16  
17 for diabetes, hypertension and ischaemic heart disease were fully attenuated after adjustments in  
18  
19 the SSD group and associations for hypertension were also fully attenuated after adjustments in  
20  
21 the BD group.  
22  
23  
24  
25

26 PLEASE INSERT TABLE 4 AROUND HERE  
27

## 28 **Discussion**

29  
30 The first objective of this study was to design and develop a suitable strategy to extract physical  
31  
32 health conditions which could be easily replicated in future multimorbidity research using mental  
33  
34 health electronic health records. The NLP strategy using MedCAT provided very good  
35  
36 performance estimates for all the conditions extracted, which supports its suitability to extract data  
37  
38 on physical health conditions from mental health clinical notes. These findings are consistent with  
39  
40 previous research which has used MedCAT to extract data from hospital settings.[34,35] This  
41  
42 resource should help to facilitate and promote research on multimorbidity using mental health  
43  
44 records, in general, and has the potential for direct replication in other mental health trusts that  
45  
46 have already deployed CRIS platforms.  
47  
48  
49

50  
51 Our second objective was to examine the prevalence of these conditions in SMI individuals and  
52  
53 compare the most prevalent multimorbidity combinations between individuals with BD and SSD.  
54  
55  
56  
57  
58  
59  
60

1  
2  
3 When we examined differences in socio-demographic variables by diagnosis, our findings were  
4 largely consistent with previous research,[3,36–39] although associations between ethnicity and  
5 BD are less established.[40] With regards to sociodemographic differences, we found that women  
6 with SSD were more likely to have diabetes, CKD, heart failure and TIA compared to men with  
7 SSD; and women with BD were more likely to have asthma, arthritis and migraine compared to  
8 men with BD. Previous research in this population showed mixed results. Some studies found  
9 higher prevalence of hypertension in women with SSD[41] and diabetes in women in BD,[42] and  
10 others did not find relevant sex differences.[43] Our findings suggest that there could be an  
11 increased risk for diabetes and hypertension for females with an SMI diagnosis, especially in SSD.  
12 Further research in this line is needed.  
13

14  
15 Ethnic differences were found for diabetes, hypertension, asthma, arthritis, epilepsy, eczema,  
16 ischaemic heart disease, COPD and cerebrovascular accident. Individuals from Black or South  
17 Asian minorities were more likely to show higher prevalence rates of diabetes and hypertension  
18 compared to White British or Irish. Black Caribbean showed the higher prevalence rates of asthma  
19 or eczema among all other groups. Arthritis, COPD, epilepsy and IHD seem to be slightly more  
20 prevalent in White British or Irish, with epilepsy showing the highest prevalence rates among Irish.  
21 Similar trends were found within SSD and BD subgroups with diabetes rates higher in South  
22 Asians with BD compared to South Asians with SSD, while diabetes rates in Black Caribbean with  
23 SSD were higher than in those with BD. These results largely mirror previous research in  
24 ethnicity.[44–50] When we examined social deprivation, individuals with diabetes, hypertension,  
25 asthma, and COPD were more likely to report the highest levels of deprivation regardless of their  
26 SMI diagnoses. Similar to ethnicity, these results are also consistent with findings in the general  
27  
28  
29  
30  
31  
32  
33  
34  
35  
36  
37  
38  
39  
40  
41  
42  
43  
44  
45  
46  
47  
48  
49  
50  
51  
52  
53  
54  
55  
56  
57  
58  
59  
60

1  
2  
3 population where higher levels of social deprivation are found in those with comorbid  
4 diabetes,[51,52] hypertension,[53] asthma[54] or COPD.[55]

7  
8 Overall, in the whole SMI cohort, around 40% of the individuals had at least one mention of a  
9  
10 physical health condition and close to 20% had two or more physical conditions, which could be  
11  
12 labelled as complex multimorbidity. These findings provide evidence to support previous research  
13  
14 suggestions about the increased probability of multimorbidity in this population.[3,17,56–59]

15  
16 Absolute numbers of physical health conditions were higher in patients with SSD than those with  
17  
18 BD. Although direct comparisons require caution, our findings partially contrast with previous  
19  
20 reports of higher number of physical comorbidities in individuals with BD.[3,38,39,41] Overall,  
21  
22 the top ten most prevalent conditions in our SMI cohort were diabetes, hypertension, asthma,  
23  
24 arthritis, epilepsy, cerebrovascular accident, eczema, migraine, ischaemic heart disease and  
25  
26 COPD; and the most common combination of conditions included diabetes, hypertension and  
27  
28 asthma, regardless of their SMI diagnoses. Moreover, those that had complex multimorbidity were  
29  
30 also more likely to have cardiometabolic comorbidities such as diabetes and hypertension, which  
31  
32 suggests that the cardiometabolic pathway might be one of the key explanatory mechanism  
33  
34 underlying the association between physical multimorbidity and severe mental illness.[60,61]

35  
36 Future research should explore further these potential independent contribution of this pathway  
37  
38 when focusing on individuals with complex multimorbidity. Furthermore, arthritis was the most  
39  
40 frequent subsequent comorbidity for those with diabetes, hypertension and/or asthma, however for  
41  
42 those with SSD and asthma, eczema slightly displaced arthritis in terms of prevalence. These  
43  
44 findings might suggest that potential differences between SSD and BD phenotypes could be linked  
45  
46 to underlying inflammatory pathways. Future research focusing on inflammatory biomarkers  
47  
48 could be key to further our understanding of the potential differences between SSD and BD.  
49  
50  
51  
52  
53  
54  
55  
56  
57  
58  
59

1  
2  
3 In addition, we examined the association between the top ten most prevalent conditions and  
4 disability levels. We found that not only multimorbidity was clearly associated with higher levels  
5 of disability but having any of these specific conditions was associated with higher levels of  
6 disability, even after adjustments for age, sex, deprivation or SMI diagnoses. Similar results were  
7 found when we further examined the associations between multimorbidity and disability within  
8 SSD and BD groups. When we examined the independent association of each physical health  
9 condition and disability within groups, our results suggested that that socio-demographic factors  
10 could have a greater impact in these associations in individuals with SSD. Although our results are  
11 not directly comparable with previous studies, they are in line with findings in previous research  
12 in ageing[62] or some specific SMI populations.[63,64] Further research is needed to understand  
13 the potential shared drivers of disability in individuals with BD and these conditions, in general,  
14 and diabetes and BD, in particular.  
15  
16  
17  
18  
19  
20  
21  
22  
23  
24  
25  
26  
27  
28  
29

30 One of the main strengths of this study is the large comprehensive cohort of people with SMI  
31 drawn from a population with a high ethnic diversity, addressing the neglect of both ethnic  
32 minority groups and SMI in multimorbidity research. This is a key advantage of using EHRs from  
33 a large secondary mental health care provider and having the benefits of a data extraction strategy  
34 for accessing data on physical health conditions from the text fields of clinical notes. MedCAT  
35 development and deployment in CRIS text records will hopefully promote and facilitate future  
36 research in mental healthcare. However, further research is needed to validate this strategy in other  
37 EHRs sources using free text. Although our results are promising and the comparability of the  
38 findings with previous research provides some evidence of validity, further research is also needed  
39 to examine the cross-validity using primary care structured fields data. The present study is limited  
40 to individuals with SMI which does not allow us to compare comorbidity figures of SMI with other  
41  
42  
43  
44  
45  
46  
47  
48  
49  
50  
51  
52  
53  
54  
55  
56  
57  
58  
59  
60

1  
2  
3 common mental disorders and/or the general population. Future studies should replicate our data  
4  
5 extraction strategy in other sex and age matched cohorts and explore the potential risks for  
6  
7 subsequent health conditions maximizing the longitudinal nature of this data source. Furthermore,  
8  
9 it is also important to note that individuals with more severe SMI may have more comprehensive  
10  
11 textual data, so that our findings might be less representative of highly functioning individuals  
12  
13 with less severe SMI. In addition, we acknowledge that although the conditions considered are  
14  
15 within the most considered in multimorbidity research, future studies should consider a larger  
16  
17 number of conditions and include rare diseases and all the conditions needed to calculate standard  
18  
19 comorbidity scores such as Charlson or Exlihauser indexes which were not considered in this study  
20  
21 (e.g., hemiplegia or paraplegia, peptic ulcer disease or AIDS/HIV). It should be noted that our  
22  
23 study is one of the first, to our knowledge, to compare the associations between physical health  
24  
25 comorbidities and disability in this traditionally neglected population and HoNOS is a widely used  
26  
27 measure in secondary mental health services in the UK which provides us a general overview of  
28  
29 disability in this population. However, we acknowledge that further research with more objective  
30  
31 measures of disability is also needed to drive future policy in this population. To sum up, our study  
32  
33 provides an overview of the most prevalent health conditions in SMI and underlines the need for  
34  
35 further research into the origins of multimorbidity in this population, considering in more detail  
36  
37 the nature of the SMI both in terms of severity and in terms of constituent diagnoses and/or  
38  
39 symptomatic phenotype, given the apparent differences between BD and SSD. Our findings  
40  
41 highlight multimorbidity as a driver of disability in this population, which also requires further  
42  
43 mechanistic evaluation.  
44  
45  
46  
47  
48  
49  
50  
51  
52  
53  
54  
55  
56  
57  
58  
59  
60

1  
2  
3 **Acknowledgments:** We would like to thank Megan Pritchard and Mathew Broadbent for their  
4 unvaluable contribution and support.  
5  
6

7  
8 **Funding statement:**  
9

10 RB is funded in part by grant MR/R016372/1 for the King's College London MRC Skills  
11 Development Fellowship programme funded by the UK Medical Research Council (MRC) and  
12 by grant IS-BRC-1215-20018 for the National Institute for Health Research (NIHR) Biomedical  
13 Research Centre at South London and Maudsley NHS Foundation Trust and King's College  
14 London. JD is funded by the Health Foundation working together with the Academy of Medical  
15 Sciences, for a Clinician Scientist Fellowship and by the ESRC in relation to the SEP-MD study  
16 [ES/S002715/1] and part supported by the ESRC Centre for Society and Mental Health at King's  
17 College London [ESRC Reference: ES/S012567/1]. DB is funded by a UKRI Innovation  
18 Fellowship as part of Health Data Research UK MR/S00310X/. AM is funded by Takeda  
19 California, Inc. RD, RS, AR are part-funded by the National Institute for Health Research  
20 (NIHR) Biomedical Research Centre at South London and Maudsley NHS Foundation Trust and  
21 King's College London. RD's work is supported by 1. National Institute for Health Research  
22 (NIHR) Biomedical Research Centre at South London and Maudsley NHS Foundation Trust and  
23 King's College London. 2. Health Data Research UK, which is funded by the UK Medical  
24 Research Council, Engineering and Physical Sciences Research Council, Economic and Social  
25 Research Council, Department of Health and Social Care (England), Chief Scientist Office of the  
26 Scottish Government Health and Social Care Directorates, Health and Social Care Research and  
27 Development Division (Welsh Government), Public Health Agency (Northern Ireland), British  
28 Heart Foundation and Wellcome Trust. 3. The National Institute for Health Research University  
29 College London Hospitals Biomedical Research Centre. This paper represents independent  
30  
31  
32  
33  
34  
35  
36  
37  
38  
39  
40  
41  
42  
43  
44  
45  
46  
47  
48  
49  
50  
51  
52  
53  
54  
55  
56  
57  
58  
59  
60



1  
2  
3 research funded by the National Institute for Health Research (NIHR) Biomedical Research  
4  
5 Centre at South London and Maudsley NHS Foundation Trust and King's College London and  
6  
7 by the Health Foundation. The views expressed are those of the author(s) and not necessarily  
8  
9 those of the NHS, the NIHR, the Department of Health, the MRC, ESRC or King's College  
10  
11 London.  
12  
13

14 **Authors contributions:** RB conceived and designed the study. ZK, RB, AR and RS designed,  
15  
16 validated the data extraction strategy. ZK, TS and AM developed the natural language processing  
17  
18 algorithm and interface for the annotations. RB, ZK, JC, LM, NC, TS, AM, NS and TW were  
19  
20 annotators. RB, ZK, SS, LL, JC, SA, RD and DB performed the data analyses and/or interpreted  
21  
22 the results. RS and JD provided clinically relevant input over all the stages. RB, ZK and SS drafted  
23  
24 the first version of the manuscript and all authors critically reviewed the manuscript and  
25  
26 contributed to writing the final version.  
27  
28  
29

30 **Data sharing statement:** Due to the confidential nature of free-text data, we are unable to make  
31  
32 patient-level data available. CRIS was developed with extensive involvement from service users  
33  
34 and adheres to strict governance frameworks managed by service users. It has passed a robust  
35  
36 ethics approval pro-cess acutely attentive to the use of patient data. Specifically, this system was  
37  
38 approved as a dataset for secondary data analysis on this basis by Oxfordshire Research Ethics  
39  
40 Committee C (08/H06060/71). The data is de-identified and used in a data-secure format and all  
41  
42 patients have the choice to opt-out of their anonymized data being used. Approval for data  
43  
44 access can only be provided from the CRIS Oversight Committee at SLAM.  
45  
46  
47

48 **Competing interest statements:** No competing interests.  
49  
50

51 **Ethics statement:** This project was approved by the CRIS Oversight Committee which is  
52  
53 responsible for ensuring all research applications comply with ethical and legal guidelines. The  
54  
55  
56  
57  
58  
59

1  
2  
3 CRIS system enables access to anonymised electronic patient records for secondary analysis from  
4  
5 SLaM and has full ethical approvals.  
6  
7  
8  
9

## 10 **References**

- 11  
12 1 Firth J, Rosenbaum S, Galletly C, *et al*. Protecting physical health in people with mental  
13  
14 illness – Authors’ reply. *Lancet Psychiatry* 2019;**6**:890–1. doi:10.1016/S2215-  
15  
16 0366(19)30387-6  
17  
18
- 19 2 Lawrence D, Kisely S, Pais J. The Epidemiology of Excess Mortality in People with Mental  
20  
21 Illness. *Can J Psychiatry* 2010;**55**:752–60. doi:10.1177/070674371005501202  
22  
23
- 24 3 Reilly S, Olier I, Planner C, *et al*. Inequalities in physical comorbidity: a longitudinal  
25  
26 comparative cohort study of people with severe mental illness in the UK. *BMJ Open*  
27  
28 2015;**5**:e009010. doi:10.1136/bmjopen-2015-009010  
29  
30
- 31 4 Woodhead C, Ashworth M, Schofield P, *et al*. Patterns of physical co-/multi-morbidity  
32  
33 among patients with serious mental illness: a London borough-based cross-sectional study.  
34  
35 *BMC Fam Pract* 2014;**15**:117. doi:10.1186/1471-2296-15-117  
36  
37
- 38 5 Filipcic IŠ, Bajic Ž, Filipcic I. The onset and accumulation of physical multimorbidity in  
39  
40 severe and common mental disorders. *Curr Opin Psychiatry* 2020;**33**:484–90.  
41  
42 doi:10.1097/YCO.0000000000000635  
43  
44
- 45 6 Cheung KL, ten Klooster PM, Smit C, *et al*. The impact of non-response bias due to  
46  
47 sampling in public health studies: A comparison of voluntary versus mandatory recruitment  
48  
49 in a Dutch national survey on adolescent health. *BMC Public Health* 2017;**17**.  
50  
51 doi:10.1186/s12889-017-4189-8  
52  
53  
54  
55  
56  
57  
58  
59  
60

- 1  
2  
3 7 Correll CU, Detraux J, Lepeleire JD, *et al.* Effects of antipsychotics, antidepressants and  
4 mood stabilizers on risk for physical diseases in people with schizophrenia, depression and  
5 bipolar disorder. *World Psychiatry* 2015;**14**:119–36. doi:<https://doi.org/10.1002/wps.20204>  
6  
7  
8  
9  
10 8 Correll CU, Solmi M, Veronese N, *et al.* Prevalence, incidence and mortality from  
11 cardiovascular disease in patients with pooled and specific severe mental illness: a large-  
12 scale meta-analysis of 3,211,768 patients and 113,383,368 controls. *World Psychiatry*  
13 2017;**16**:163–80. doi:<https://doi.org/10.1002/wps.20420>  
14  
15  
16  
17  
18  
19 9 DE HERT M, CORRELL CU, BOBES J, *et al.* Physical illness in patients with severe  
20 mental disorders. I. Prevalence, impact of medications and disparities in health care. *World*  
21 *Psychiatry* 2011;**10**:52–77.  
22  
23  
24  
25  
26 10 Fan Z, Wu Y, Shen J, *et al.* Schizophrenia and the risk of cardiovascular diseases: A meta-  
27 analysis of thirteen cohort studies. *J Psychiatr Res* 2013;**47**:1549–56.  
28  
29  
30  
31  
32  
33 11 Pouget JG, Schizophrenia Working Group of the Psychiatric Genomics Consortium, Han B,  
34 *et al.* Cross-disorder analysis of schizophrenia and 19 immune-mediated diseases identifies  
35 shared genetic risk. *Hum Mol Genet* 2019;**28**:3498–513. doi:[10.1093/hmg/ddz145](https://doi.org/10.1093/hmg/ddz145)  
36  
37  
38  
39  
40 12 Rosenblat JD, McIntyre RS. Are medical comorbid conditions of bipolar disorder due to  
41 immune dysfunction? *Acta Psychiatr Scand* 2015;**132**:180–91.  
42  
43  
44  
45  
46  
47 13 Tylee DS, Sun J, Hess JL, *et al.* Genetic correlations among psychiatric and immune-related  
48 phenotypes based on genome-wide association data. *Am J Med Genet B Neuropsychiatr*  
49 *Genet* 2018;**177**:641–57. doi:<https://doi.org/10.1002/ajmg.b.32652>  
50  
51  
52  
53  
54  
55  
56  
57  
58  
59  
60

- 1  
2  
3 14 Leo RJ, Singh J. Migraine headache and bipolar disorder comorbidity: A systematic review  
4 of the literature and clinical implications. *Scand J Pain* 2016;**11**:136–45.  
5  
6 doi:10.1016/j.sjpain.2015.12.002  
7  
8  
9  
10 15 McKay KA, Tremlett H, Fisk JD, *et al.* Psychiatric comorbidity is associated with disability  
11 progression in multiple sclerosis. *Neurology* 2018;**90**:e1316–23.  
12  
13 doi:10.1212/WNL.0000000000005302  
14  
15  
16  
17 16 Dorrington S, Carr E, Stevelink SAM, *et al.* Multimorbidity and fit note receipt in working-  
18 age adults with long-term health conditions. *Psychol Med* undefined/ed;:1–10.  
19  
20 doi:10.1017/S0033291720002937  
21  
22  
23  
24 17 Kugathasan P, Wu H, Gaughran F, *et al.* Association of physical health multimorbidity with  
25 mortality in people with schizophrenia spectrum disorders: Using a novel semantic search  
26 system that captures physical diseases in electronic patient records. *Schizophr Res*  
27  
28 2020;**216**:408–15. doi:10.1016/j.schres.2019.10.061  
29  
30  
31  
32  
33 18 Barnett K, Mercer SW, Norbury M, *et al.* Epidemiology of multimorbidity and implications  
34 for health care, research, and medical education: a cross-sectional study. *The Lancet*  
35  
36 2012;**380**:37–43. doi:10.1016/S0140-6736(12)60240-2  
37  
38  
39  
40 19 Cassell A, Edwards D, Harshfield A, *et al.* The epidemiology of multimorbidity in primary  
41 care: a retrospective cohort study. *Br J Gen Pract* 2018;**68**:e245–51.  
42  
43 doi:10.3399/bjgp18X695465  
44  
45  
46  
47 20 Kuan V, Denaxas S, Gonzalez-Izquierdo A, *et al.* A chronological map of 308 physical and  
48 mental health conditions from 4 million individuals in the English National Health Service.  
49  
50 *Lancet Digit Health* 2019;**1**:e63–77. doi:10.1016/S2589-7500(19)30012-3  
51  
52  
53  
54  
55  
56  
57  
58  
59  
60

- 1  
2  
3 21 Altamura AC, Buoli M, Pozzoli S. Role of immunological factors in the pathophysiology  
4 and diagnosis of bipolar disorder: Comparison with schizophrenia. *Psychiatry Clin Neurosci*  
5 2014;**68**:21–36. doi:<https://doi.org/10.1111/pcn.12089>  
6  
7  
8  
9  
10 22 Sahu A, Chowdhury HA, Gaikwad M, *et al.* Integrative network analysis identifies  
11 differential regulation of neuroimmune system in Schizophrenia and Bipolar disorder. *Brain*  
12 *Behav Immun - Health* 2020;**2**:100023. doi:10.1016/j.bbih.2019.100023  
13  
14  
15  
16  
17 23 Walker J, Curtis V, Shaw P, *et al.* Schizophrenia and bipolar disorder are distinguished  
18 mainly by differences in neurodevelopment. *Neurotox Res* 2002;**4**:427.  
19  
20  
21  
22  
23  
24 24 WHO | The world health report 2001 - Mental Health: New Understanding, New Hope.  
25  
26  
27  
28  
29 25 Prediction of disability in schizophrenia: Symptoms, cognition, and self-assessment - Philip  
30  
31  
32  
33  
34  
35  
36 26 Sanchez-Moreno J, Martinez-Aran A, Tabarés-Seisdedos R, *et al.* Functioning and Disability  
37 in Bipolar Disorder: An Extensive Review. *Psychother Psychosom* 2009;**78**:285–97.  
38  
39  
40  
41  
42  
43 27 Stewart R, Soremekun M, Perera G, *et al.* The South London and Maudsley NHS Foundation  
44  
45  
46  
47  
48  
49 28 ICD-10 Version:2016. <https://icd.who.int/browse10/2016/en> (accessed 9 Jun 2021).  
50  
51  
52  
53  
54  
55  
56  
57  
58  
59  
60

- 1  
2  
3 29 Kraljevic Z, Searle T, Shek A, *et al.* Multi-domain Clinical Natural Language Processing  
4 with MedCAT: the Medical Concept Annotation Toolkit. *ArXiv201001165 Cs* Published  
5 Online First: 25 March 2021. <http://arxiv.org/abs/2010.01165> (accessed 4 Jun 2021).  
6  
7  
8  
9  
10 30 Searle T, Kraljevic Z, Bendayan R, *et al.* MedCATTrainer: A Biomedical Free Text  
11 Annotation Interface with Active Learning and Research Use Case Specific Customisation.  
12 *ArXiv190707322 Cs* Published Online First: 16 July 2019. <http://arxiv.org/abs/1907.07322>  
13 (accessed 19 Aug 2020).  
14  
15  
16  
17  
18  
19 31 English indices of deprivation 2019: technical report. GOV.UK.  
20 [https://www.gov.uk/government/publications/english-indices-of-deprivation-2019-technical-](https://www.gov.uk/government/publications/english-indices-of-deprivation-2019-technical-report)  
21 report (accessed 4 Jun 2021).  
22  
23  
24  
25  
26 32 Wing JK, Beevor AS, Curtis RH, *et al.* Health of the Nation Outcome Scales (HoNOS):  
27 Research and development. *Br J Psychiatry* 1998;**172**:11–8. doi:10.1192/bjp.172.1.11  
28  
29  
30  
31 33 Jewell A, Pritchard M, Barrett K, *et al.* The Maudsley Biomedical Research Centre (BRC)  
32 data linkage service user and carer advisory group: creating and sustaining a successful  
33 patient and public involvement group to guide research in a complex area. *Res Involv*  
34 *Engagem* 2019;**5**:20. doi:10.1186/s40900-019-0152-4  
35  
36  
37  
38  
39  
40 34 Bean DM, Kraljevic Z, Searle T, *et al.* Angiotensin-converting enzyme inhibitors and  
41 angiotensin II receptor blockers are not associated with severe COVID-19 infection in a  
42 multi-site UK acute hospital trust. *Eur J Heart Fail* 2020;**22**:967–74.  
43  
44  
45  
46  
47 doi:<https://doi.org/10.1002/ejhf.1924>  
48  
49  
50 35 Carr E, Bendayan R, Bean D, *et al.* Evaluation and improvement of the National Early  
51 Warning Score (NEWS2) for COVID-19: a multi-hospital study. *BMC Med* 2021;**19**:23.  
52  
53  
54  
55  
56  
57  
58  
59  
60

- 1  
2  
3 36 Birgenheir DG, Ilgen MA, Bohnert ASB, *et al.* Pain conditions among veterans with  
4 schizophrenia or bipolar disorder. *Gen Hosp Psychiatry* 2013;**35**:480–4.  
5  
6 doi:10.1016/j.genhosppsy.2013.03.019  
7  
8  
9  
10 37 Haroon S, Hayes JF, Blackburn R, *et al.* Recording of Severe Mental Illness in United  
11 Kingdom Primary Care, 2000–2010. *PLOS ONE* 2013;**8**:e82365.  
12  
13 doi:10.1371/journal.pone.0082365  
14  
15  
16 38 Smith DJ, Langan J, McLean G, *et al.* Schizophrenia is associated with excess multiple  
17 physical-health comorbidities but low levels of recorded cardiovascular disease in primary  
18 care: cross-sectional study. *BMJ Open* 2013;**3**:e002808. doi:10.1136/bmjopen-2013-002808  
19  
20  
21  
22 39 Smith DJ, Martin D, McLean G, *et al.* Multimorbidity in bipolar disorder and undertreatment  
23 of cardiovascular disease: a cross sectional study. *BMC Med* 2013;**11**:263.  
24  
25 doi:10.1186/1741-7015-11-263  
26  
27  
28  
29 40 Halvorsrud K, Nazroo J, Otis M, *et al.* Ethnic inequalities in the incidence of diagnosis of  
30 severe mental illness in England: a systematic review and new meta-analyses for non-  
31 affective and affective psychoses. *Soc Psychiatry Psychiatr Epidemiol* 2019;**54**:1311–23.  
32  
33 doi:10.1007/s00127-019-01758-y  
34  
35  
36  
37 41 Oreški I, Jakovljević M, Aukst-Margetić B, *et al.* Comorbidity and multimorbidity in  
38 patients with schizophrenia and bipolar disorder: similarities and differences. *Psychiatr*  
39 *Danub* 2012;**24**:80–5.  
40  
41  
42 42 Patel RS, Virani S, Saeed H, *et al.* Gender Differences and Comorbidities in U.S. Adults  
43 with Bipolar Disorder. *Brain Sci* 2018;**8**:168. doi:10.3390/brainsci8090168  
44  
45  
46  
47 43 Severe mental illness (SMI) and physical health inequalities: briefing. GOV.UK.  
48  
49  
50  
51  
52  
53  
54  
55  
56  
57  
58  
59  
60

- 1  
2  
3 inequalities/severe-mental-illness-and-physical-health-inequalities-briefing (accessed 4 Jun  
4  
5 2021).
- 6  
7
- 8 44 Das-Munshi J, Ashworth M, Dewey ME, *et al*. Type 2 diabetes mellitus in people with  
9  
10 severe mental illness: inequalities by ethnicity and age. Cross-sectional analysis of 588 408  
11 records from the UK. *Diabet Med* 2017;**34**:916–24. doi:<https://doi.org/10.1111/dme.13298>
- 12  
13
- 14 45 Gaughran F, Stahl D, Stringer D, *et al*. Effect of lifestyle, medication and ethnicity on  
15  
16 cardiometabolic risk in the year following the first episode of psychosis: prospective cohort  
17 study. *Br J Psychiatry* 2019;**215**:712–9. doi:10.1192/bjp.2019.159
- 18  
19
- 20 46 Lusignan S de, Alexander H, Broderick C, *et al*. The epidemiology of eczema in children and  
21  
22 adults in England: A population-based study using primary care data. *Clin Exp Allergy*  
23  
24 2021;**51**:471–82. doi:<https://doi.org/10.1111/cea.13784>
- 25  
26
- 27 47 Gilkes A, Ashworth M, Schofield P, *et al*. Does COPD risk vary by ethnicity? A  
28  
29 retrospective cross-sectional study. *Int J Chron Obstruct Pulmon Dis* 2016;**11**:739–46.  
30  
31 doi:10.2147/COPD.S96391
- 32  
33
- 34 48 Godsland IF, Johnston DG, Chaturvedi N. Mechanisms of Disease: lessons from ethnicity in  
35  
36 the role of triglyceride metabolism in ischemic heart disease. *Nat Clin Pract Endocrinol*  
37  
38 *Metab* 2007;**3**:530–8. doi:10.1038/ncpendmet0530
- 39  
40
- 41 49 Health Survey for England - 2004: Health of ethnic minorities, Headline results. NHS Digit.  
42  
43 [https://digital.nhs.uk/data-and-information/publications/statistical/health-survey-for-](https://digital.nhs.uk/data-and-information/publications/statistical/health-survey-for-england/health-survey-for-england-2004-health-of-ethnic-minorities-headline-results)  
44  
45 [england/health-survey-for-england-2004-health-of-ethnic-minorities-headline-results](https://digital.nhs.uk/data-and-information/publications/statistical/health-survey-for-england/health-survey-for-england-2004-health-of-ethnic-minorities-headline-results)  
46  
47  
48 (accessed 4 Jun 2021).
- 49  
50
- 51 50 Public Health Profiles - PHE. <https://fingertips.phe.org.uk/> (accessed 4 Jun 2021).  
52  
53  
54  
55  
56  
57  
58  
59  
60



- 1  
2  
3 51 Zghebi SS, Steinke DT, Carr MJ, *et al.* Examining trends in type 2 diabetes incidence,  
4 prevalence and mortality in the UK between 2004 and 2014. *Diabetes Obes Metab*  
5 2017;**19**:1537–45. doi:<https://doi.org/10.1111/dom.12964>  
6  
7  
8  
9  
10 52 Diabetes Prevention Programme, 2017-18 Diagnoses and Demographics. NHS Digit.  
11 [https://digital.nhs.uk/data-and-information/publications/statistical/national-diabetes-](https://digital.nhs.uk/data-and-information/publications/statistical/national-diabetes-audit/diabetes-prevention-programme-2017-18)  
12 [audit/diabetes-prevention-programme-2017-18](https://digital.nhs.uk/data-and-information/publications/statistical/national-diabetes-audit/diabetes-prevention-programme-2017-18) (accessed 4 Jun 2021).  
13  
14  
15  
16  
17 53 Leng B, Jin Y, Li G, *et al.* Socioeconomic status and hypertension: a meta-analysis. *J*  
18 *Hypertens* 2015;**33**:221–9. doi:10.1097/HJH.0000000000000428  
19  
20  
21 54 Gupta RP, Mukherjee M, Sheikh A, *et al.* Persistent variations in national asthma mortality,  
22 hospital admissions and prevalence by socioeconomic status and region in England. *Thorax*  
23 2018;**73**:706–12. doi:10.1136/thoraxjnl-2017-210714  
24  
25  
26  
27  
28 55 Simpson CR, Hippisley-Cox J, Sheikh A. Trends in the epidemiology of chronic obstructive  
29 pulmonary disease in England: a national study of 51 804 patients. *Br J Gen Pract*  
30 2010;**60**:e277–84. doi:10.3399/bjgp10X514729  
31  
32  
33  
34  
35 56 Carney CP, Jones L, Woolson RF. Medical comorbidity in women and men with  
36 schizophrenia. *J Gen Intern Med* 2006;**21**:1133–7. doi:10.1111/j.1525-1497.2006.00563.x  
37  
38  
39  
40 57 Gabilondo A, Alonso-Moran E, Nuño-Solinis R, *et al.* Comorbidities with chronic physical  
41 conditions and gender profiles of illness in schizophrenia. Results from PREST, a new health  
42 dataset. *J Psychosom Res* 2017;**93**:102–9. doi:10.1016/j.jpsychores.2016.12.011  
43  
44  
45  
46  
47 58 Kugathasan P, Stubbs B, Aagaard J, *et al.* Increased mortality from somatic multimorbidity  
48 in patients with schizophrenia: a Danish nationwide cohort study. *Acta Psychiatr Scand*  
49 2019;**140**:340–8. doi:10.1111/acps.13076  
50  
51  
52  
53  
54  
55  
56  
57  
58  
59  
60

- 1  
2  
3 59 Severe mental illness (SMI) and physical health inequalities: briefing. GOV.UK.  
4  
5 [https://www.gov.uk/government/publications/severe-mental-illness-smi-physical-health-](https://www.gov.uk/government/publications/severe-mental-illness-smi-physical-health-inequalities/severe-mental-illness-and-physical-health-inequalities-briefing)  
6 [inequalities/severe-mental-illness-and-physical-health-inequalities-briefing](https://www.gov.uk/government/publications/severe-mental-illness-smi-physical-health-inequalities/severe-mental-illness-and-physical-health-inequalities-briefing) (accessed 3 Mar  
7  
8 2020).  
9  
10  
11  
12 60 Firth J, Siddiqi N, Koyanagi A, *et al*. The Lancet Psychiatry Commission: a blueprint for  
13  
14 protecting physical health in people with mental illness. *Lancet Psychiatry* 2019;**6**:675–712.  
15  
16 doi:10.1016/S2215-0366(19)30132-4  
17  
18  
19 61 Henderson DC, Vincenzi B, Andrea NV, *et al*. Pathophysiological mechanisms of increased  
20  
21 cardiometabolic risk in people with schizophrenia and other severe mental illnesses. *Lancet*  
22  
23 *Psychiatry* 2015;**2**:452–64. doi:10.1016/S2215-0366(15)00115-7  
24  
25  
26 62 Quiñones AR, Markwardt S, Botosaneanu A. Multimorbidity Combinations and Disability in  
27  
28 Older Adults. *J Gerontol A Biol Sci Med Sci* 2016;**71**:823–30. doi:10.1093/gerona/glw035  
29  
30  
31 63 Desalegn D, Girma S, Abdeta T. Quality of life and its association with current substance  
32  
33 use, medication non-adherence and clinical factors of people with schizophrenia in  
34  
35 Southwest Ethiopia: a hospital-based cross-sectional study. *Health Qual Life Outcomes*  
36  
37 2020;**18**. doi:10.1186/s12955-020-01340-0  
38  
39  
40 64 McIntyre RS, Konarski JZ, Soczynska JK, *et al*. Medical Comorbidity in Bipolar Disorder:  
41  
42 Implications for Functional Outcomes and Health Service Utilization. *Psychiatr Serv*  
43  
44 2006;**57**:1140–4. doi:10.1176/ps.2006.57.8.1140  
45  
46  
47  
48  
49  
50  
51  
52  
53  
54  
55  
56  
57  
58  
59  
60

Table 1. MedCAT performance F1, precision and recall estimates for each physical health conditions.

| <b>Physical Health Condition</b>         | <b>F1</b> | <b>Precision</b> | <b>Recall</b> |
|------------------------------------------|-----------|------------------|---------------|
| Diabetes mellitus                        | 0.98      | 0.99             | 0.98          |
| Heart failure                            | 0.97      | 0.97             | 0.96          |
| Ischemic heart disease                   | 0.98      | 0.97             | 0.99          |
| Hypertensive disorder, systemic arterial | 0.97      | 0.97             | 0.96          |
| Chronic obstructive lung disease         | 0.94      | 0.97             | 0.92          |
| Asthma                                   | 1.00      | 1.00             | 1.00          |
| Chronic kidney disease                   | 1.00      | 1.00             | 0.99          |
| Cerebrovascular accident                 | 0.96      | 0.94             | 0.98          |
| Transient ischemic attack                | 0.91      | 0.82             | 1.00          |
| Parkinson's disease                      | 0.94      | 0.88             | 1.00          |
| Multiple sclerosis                       | 1.00      | 1.00             | 1.00          |
| Epilepsy                                 | 0.93      | 1.00             | 0.85          |
| Migraine                                 | 1.00      | 1.00             | 1.00          |
| Atrial fibrillation                      | 0.98      | 1.00             | 0.96          |
| Chronic sinusitis                        | 0.98      | 0.97             | 1.00          |
| Inflammatory bowel disease               | 0.96      | 1.00             | 0.92          |
| Chronic liver disease                    | 1.00      | 1.00             | 1.00          |
| Psoriasis                                | 1.00      | 1.00             | 1.00          |
| Eczema                                   | 0.94      | 1.00             | 0.88          |
| Arthritis                                | 1.00      | 1.00             | 1.00          |

Table 2. Socio-demographic characteristics and prevalence for physical health conditions for total cohort (N=17500) and by SMI diagnosis.

|                                         | <b>Total</b> | <b>SSD</b>   | <b>BD</b>   |
|-----------------------------------------|--------------|--------------|-------------|
| <b>N (%)</b>                            | 17500        | 13019 (74.4) | 4481 (25.6) |
| <b>Sex***</b>                           |              |              |             |
| Female                                  | 8123 (46.4)  | 5421 (41.6)  | 2702 (60.3) |
| Male                                    | 9374 (53.6)  | 7596 (58.3)  | 1778 (39.7) |
| <b>Age at first SMI diagnosis***</b>    |              |              |             |
| 15 – 34                                 | 7497 (42.8)  | 5607 (43.1)  | 1890 (42.2) |
| 35 – 44                                 | 3736 (21.3)  | 2792 (21.4)  | 944 (21.1)  |
| 45 – 54                                 | 2783 (15.9)  | 2057 (15.8)  | 726 (16.2)  |
| 55 – 64                                 | 1525 (8.7)   | 1067 (8.2)   | 458 (10.2)  |
| 65+                                     | 1959 (11.2)  | 1496 (11.5)  | 463 (10.3)  |
| <b>Ethnicity***</b>                     |              |              |             |
| White British                           | 6243 (35.7)  | 4008 (30.8)  | 2235 (49.9) |
| Black Caribbean                         | 3182 (18.2)  | 2799 (21.5)  | 383 (8.5)   |
| Black African                           | 2094 (12.0)  | 1886 (14.5)  | 208 (4.6)   |
| South Asian                             | 549 (3.1)    | 421 (3.2)    | 128 (2.9)   |
| Irish                                   | 346 (2.0)    | 240 (1.8)    | 106 (2.4)   |
| Other                                   | 3846 (22.0)  | 2822 (21.7)  | 1024 (22.9) |
| Not stated                              | 1240 (7.1)   | 843 (6.5)    | 397 (8.9)   |
| <b>Index of multiple deprivation***</b> |              |              |             |
| 1 (less deprived)                       | 742 (4.2)    | 412 (3.2)    | 330 (7.4)   |
| 2                                       | 1384 (7.9)   | 887 (6.8)    | 497 (11.1)  |
| 3                                       | 3575 (20.4)  | 2503 (19.2)  | 1072 (23.9) |
| 4                                       | 7073 (40.4)  | 5476 (42.1)  | 1597 (35.6) |
| 5 (more deprived)                       | 4033 (23.0)  | 3204 (24.6)  | 829 (18.5)  |
| Unknown                                 | 693 (4.0)    | 537 (4.1)    | 156 (3.5)   |
| <b>Number of conditions***</b>          |              |              |             |
| No mentions                             | 10468 (59.8) | 7540 (57.9)  | 2928 (65.3) |
| One                                     | 3733 (21.3)  | 2888 (22.2)  | 845 (18.9)  |
| Two                                     | 1795 (10.3)  | 1429 (11.0)  | 366 (8.2)   |
| Three or more                           | 1504 (8.6)   | 1162 (8.9)   | 342 (7.6)   |
| <b>Physical conditions***</b>           |              |              |             |
| Diabetes***                             | 2686 (15.3)  | 2208 (17.0)  | 478 (10.7)  |
| Hypertension***                         | 2537 (14.5)  | 2070 (15.9)  | 467 (10.4)  |
| Asthma                                  | 1722 (9.8)   | 1291 (9.9)   | 431 (9.6)   |
| Arthritis                               | 954 (5.5)    | 702 (5.4)    | 252 (5.6)   |
| Epilepsy***                             | 799 (4.6)    | 652 (5.0)    | 147 (3.3)   |
| Cerebrovascular accident                | 728 (4.2)    | 573 (4.4)    | 155 (3.5)   |
| Eczema                                  | 616 (3.5)    | 479 (3.7)    | 137 (3.1)   |

|    |                               |           |           |           |
|----|-------------------------------|-----------|-----------|-----------|
| 1  |                               |           |           |           |
| 2  |                               |           |           |           |
| 3  | Migraine***                   | 564 (3.2) | 372 (2.9) | 192 (4.3) |
| 4  | Ischemic heart disease        | 561 (3.2) | 435 (3.3) | 126 (2.8) |
| 5  | Chronic Obstructive Pulmonary |           |           |           |
| 6  | disease                       | 476 (2.7) | 342 (2.6) | 134 (3.0) |
| 7  |                               |           |           |           |
| 8  | Chronic kidney disease*       | 279 (1.6) | 179 (1.4) | 100 (2.2) |
| 9  | Parkinson's disease           | 266 (1.5) | 201 (1.5) | 65 (1.5)  |
| 10 | Heart failure**               | 222 (1.3) | 187 (1.4) | 35 (0.8)  |
| 11 | Psoriasis                     | 179 (1.0) | 129 (1.0) | 50 (1.1)  |
| 12 | Atrial fibrillation           | 133 (0.8) | 100 (0.8) | 33 (0.7)  |
| 13 | Transient Ischaemic Attack    | 130 (0.7) | 91 (0.7)  | 39 (0.9)  |
| 14 | Inflammatory Bowel Disease    | 40 (0.2)  | 25 (0.2)  | 15 (0.3)  |
| 15 | Multiple sclerosis            | 32 (0.2)  | 19 (0.1)  | 13 (0.3)  |
| 16 | Chronic liver disease         | 22 (0.1)  | 20 (0.2)  | 2 (0.0)   |
| 17 | Chronic sinusitis             | 6 (0.0)   | 6 (0.0)   | 0 (0.0)   |
| 18 |                               |           |           |           |

Note. \*\*\* p < .001; \*\* p < .01; \* p < .05 for comparisons between BD and SSD groups

peer review only

Table 3. Ten most prevalent conditions and associated comorbidities of the total cohort and by SMI diagnosis.

| Condition                      | Prevalence   | Mean # of comorbidities | Three most frequent associated comorbidities |                     |                      |                      |
|--------------------------------|--------------|-------------------------|----------------------------------------------|---------------------|----------------------|----------------------|
|                                | <i>Total</i> | -                       | 0.74                                         | 1. Diabetes (15.3%) | 2. HTN (14.5%)       | 3. Asthma (9.8%)     |
|                                | <i>SSD</i>   | -                       | 0.77                                         | 1. Diabetes (17.0%) | 2. HTN (15.9%)       | 3. Asthma (9.9%)     |
|                                | <i>BD</i>    | -                       | 0.64                                         | 1. Diabetes (10.7%) | 2. HTN (10.4%)       | 3. Asthma (9.6%)     |
| <b>Diabetes</b>                | <i>Total</i> | 15.3%                   | 2.35                                         | 1. HTN (42.1%)      | 2. Asthma (16.9%)    | 3. Arthritis (13.2%) |
|                                | <i>SSD</i>   | 17.0%                   | 2.33                                         | 1. HTN (42.9%)      | 2. Asthma (16.3%)    | 3. Arthritis (12.7%) |
|                                | <i>BD</i>    | 10.7%                   | 2.45                                         | 1. HTN (38.3%)      | 2. Asthma (19.5%)    | 3. Arthritis (15.5%) |
| <b>Hypertension</b>            | <i>Total</i> | 14.5%                   | 2.50                                         | 1. Diabetes (44.5%) | 2. Asthma (16.3%)    | 3. Arthritis (15.2%) |
|                                | <i>SSD</i>   | 15.9%                   | 2.47                                         | 1. Diabetes (45.7%) | 2. Asthma (16.1%)    | 3. Arthritis (14.7%) |
|                                | <i>BD</i>    | 10.4%                   | 2.62                                         | 1. Diabetes (39.2%) | 2. Arthritis (17.3%) | 3. Asthma (17.1%)    |
| <b>Asthma</b>                  | <i>Total</i> | 9.8%                    | 2.27                                         | 1. Diabetes (26.3%) | 2. HTN (24.0%)       | 3. Arthritis (11.9%) |
|                                | <i>SSD</i>   | 9.9%                    | 2.27                                         | 1. Diabetes (27.9%) | 2. HTN (25.9%)       | 3. Eczema (11.2%)    |
|                                | <i>BD</i>    | 9.6%                    | 2.29                                         | 1. Diabetes (21.6%) | 2. HTN (18.6%)       | 3. Arthritis (15.1%) |
| <b>Arthritis</b>               | <i>Total</i> | 5.5%                    | 2.78                                         | 1. HTN (40.5%)      | 2. Diabetes (37.1%)  | 3. Asthma (21.5%)    |
|                                | <i>SSD</i>   | 5.4%                    | 2.78                                         | 1. HTN (43.4%)      | 2. Diabetes (39.9%)  | 3. Asthma (19.9%)    |
|                                | <i>BD</i>    | 5.6%                    | 2.80                                         | 1. HTN (32.1%)      | 2. Diabetes (29.4%)  | 3. Asthma (25.8%)    |
| <b>Epilepsy</b>                | <i>Total</i> | 4.6%                    | 2.40                                         | 1. HTN (25.5%)      | 2. Diabetes (24.8%)  | 3. Asthma (21.4%)    |
|                                | <i>SSD</i>   | 5.0%                    | 2.42                                         | 1. HTN (27.3%)      | 2. Diabetes (26.4%)  | 3. Asthma (21.8%)    |
|                                | <i>BD</i>    | 3.3%                    | 2.31                                         | 1. Asthma (19.7%)   | 2. Diabetes (17.7%)  | 2. HTN (17.7%)       |
| <b>CVA</b>                     | <i>Total</i> | 4.2%                    | 2.89                                         | 1. HTN (42.3%)      | 2. Diabetes (38.6%)  | 3. Asthma (15.4%)    |
|                                | <i>SSD</i>   | 4.4%                    | 2.83                                         | 1. HTN (42.8%)      | 2. Diabetes (38.9%)  | 3. Asthma (14.0%)    |
|                                | <i>BD</i>    | 3.5%                    | 3.09                                         | 1. HTN (40.6%)      | 2. Diabetes (37.4%)  | 3. Asthma (21.9%)    |
| <b>Eczema</b>                  | <i>Total</i> | 3.5%                    | 2.50                                         | 1. Asthma (32.5%)   | 2. Diabetes (26.9%)  | 3. HTN (23.1%)       |
|                                | <i>SSD</i>   | 3.7%                    | 2.45                                         | 1. Asthma (30.3%)   | 2. Diabetes (28.4%)  | 3. HTN (22.5%)       |
|                                | <i>BD</i>    | 3.1%                    | 2.64                                         | 1. Asthma (40.1%)   | 2. HTN (24.8%)       | 3. Diabetes (21.9%)  |
| <b>Migraine</b>                | <i>Total</i> | 3.2%                    | 2.20                                         | 1. Asthma (23.6%)   | 2. Diabetes (20.0%)  | 3. HTN (18.4%)       |
|                                | <i>SSD</i>   | 2.9%                    | 2.23                                         | 1. Diabetes (23.4%) | 2. Asthma (21.5%)    | 3. HTN (20.2%)       |
|                                | <i>BD</i>    | 4.3%                    | 2.15                                         | 1. Asthma (27.6%)   | 2. HTN (15.1%)       | 3. Arthritis (14.1%) |
| <b>Ischaemic heart disease</b> | <i>Total</i> | 3.2%                    | 3.27                                         | 1. HTN (49.0%)      | 2. Diabetes (43.3%)  | 3. Asthma (20.3%)    |
|                                | <i>SSD</i>   | 3.3%                    | 3.28                                         | 1. HTN (51.0%)      | 2. Diabetes (44.6%)  | 3. Asthma (20.2%)    |
|                                | <i>BD</i>    | 2.8%                    | 3.24                                         | 1. HTN (42.1%)      | 2. Diabetes (38.9%)  | 3. Arthritis (22.2%) |
| <b>COPD</b>                    | <i>Total</i> | 2.7%                    | 3.22                                         | 1. HTN (39.7%)      | 2. Diabetes (38.9%)  | 3. Asthma (35.7%)    |
|                                | <i>SSD</i>   | 2.6%                    | 3.20                                         | 1. Diabetes (41.2%) | 2. HTN (39.2%)       | 3. Asthma (35.7%)    |
|                                | <i>BD</i>    | 3.0%                    | 3.25                                         | 1. HTN (41.0%)      | 2. Asthma (35.8%)    | 3. Diabetes (32.8%)  |

*Note.* SSD: Schizophrenia Spectrum disorders. BD: Bipolar disorders. HTN: hypertension

Table 4. Associations between specific comorbidities, multimorbidity and HoNOS scores. Models were adjusted by age and sex (Model 1), and then additionally adjusted by IMD (Model 2a) or SMI diagnosis (Model 2b).

|                                 | HoNOS<br>Mean<br>(SD) | Unadjusted<br>B (95% CI)    | Model 1<br>B (95% CI)       | Model 2a<br>B (95% CI)      | Model 2b<br>B (95% CI)      |
|---------------------------------|-----------------------|-----------------------------|-----------------------------|-----------------------------|-----------------------------|
| <b>Physical comorbidities</b>   |                       |                             |                             |                             |                             |
| <b>Diabetes</b>                 | 10.93<br>(6.08)       | 0.652 (0.389 –<br>0.914)*** | 0.464 (0.198 –<br>0.730)*** | 0.485 (0.215 –<br>0.755)*** | 0.359 (0.094 –<br>0.625)**  |
| Ref: No diabetes                | 10.28<br>(6.05)       |                             |                             |                             |                             |
| <b>Hypertension</b>             | 10.99<br>(6.02)       | 0.713 (0.446 –<br>0.980)*** | 0.401 (0.123 –<br>0.680)**  | 0.368 (0.084 –<br>0.652)*   | 0.297 (0.019 –<br>0.576)*   |
| Ref: No hypertension            | 10.27<br>(6.06)       |                             |                             |                             |                             |
| <b>Asthma</b>                   | 11.05<br>(6.16)       | 0.734 (0.417 –<br>1.051)*** | 0.806 (0.490 –<br>1.121)*** | 0.770 (0.450 –<br>1.091)*** | 0.804 (0.489 –<br>1.118)*** |
| Ref: No asthma                  | 10.31<br>(6.04)       |                             |                             |                             |                             |
| <b>Arthritis</b>                | 12.01<br>(6.19)       | 1.728 (1.322 –<br>2.134)*** | 1.570 (1.156 –<br>1.984)*** | 1.558 (1.142 –<br>1.974)*** | 1.567 (1.155 –<br>1.980)*** |
| Ref: No arthritis               | 10.28<br>(6.03)       |                             |                             |                             |                             |
| <b>Epilepsy</b>                 | 11.40<br>(6.19)       | 1.055 (0.596 –<br>1.514)*** | 1.066 (0.609 –<br>1.523)*** | 1.089 (0.628 –<br>1.549)*** | 0.982 (0.527 –<br>1.437)*** |
| Ref: No epilepsy                | 10.35<br>(6.05)       |                             |                             |                             |                             |
| <b>CVA</b>                      | 11.81<br>(6.22)       | 1.487 (1.022 –<br>1.951)*** | 1.195 (0.728 –<br>1.662)*** | 1.180 (0.712 –<br>1.649)*** | 1.162 (0.697 –<br>1.627)*** |
| Ref: No CVA                     | 10.33<br>(6.04)       |                             |                             |                             |                             |
| <b>Eczema</b>                   | 11.12<br>(6.19)       | 0.753 (0.249 –<br>1.257)**  | 0.838 (0.336 –<br>1.340)*** | 0.728 (0.220 –<br>1.237)**  | 0.799 (0.299 –<br>1.299)**  |
| Ref: No eczema                  | 10.37<br>(6.05)       |                             |                             |                             |                             |
| <b>Migraine</b>                 | 10.33<br>(5.73)       | -0.078 (-0.600 –<br>0.445)  | 0.212 (-0.311 –<br>0.734)   | 0.227 (-0.300 –<br>0.754)   | 0.302 (-0.218 –<br>0.823)   |
| Ref: No migraine                | 10.40<br>(6.07)       |                             |                             |                             |                             |
| <b>Ischaemic heart disease</b>  | 11.64<br>(5.92)       | 1.294 (0.766 –<br>1.822)*** | 0.864 (0.332 –<br>1.395)*** | 0.853 (0.318 –<br>1.387)**  | 0.849 (0.320 –<br>1.379)**  |
| Ref: No ischaemic heart disease | 10.35<br>(6.06)       |                             |                             |                             |                             |
| <b>COPD</b>                     | 12.08<br>(5.78)       | 1.733 (1.158 –<br>2.309)*** | 1.326 (0.745 –<br>1.908)*** | 1.336 (0.750 –<br>1.923)*** | 1.397 (0.818 –<br>1.977)*** |
| Ref: No COPD                    | 10.34<br>(6.06)       |                             |                             |                             |                             |
| <b>Multimorbidity</b>           |                       |                             |                             |                             |                             |

|                                |              |                          |                          |                          |                          |
|--------------------------------|--------------|--------------------------|--------------------------|--------------------------|--------------------------|
| <b>Number of comorbidities</b> |              | 0.487 (0.406 – 0.567)*** | 0.423 (0.339 – 0.507)*** | 0.424 (0.339 – 0.510)*** | 0.404 (0.320 – 0.488)*** |
| <b>1 or more comorbidities</b> | 10.96 (6.08) | 1.053 (0.850 – 1.256)*** | 0.893 (0.685 – 1.101)*** | 0.895 (0.681 – 1.109)*** | 0.823 (0.615 – 1.031)*** |
| Ref: No comorbidities          | 9.90 (5.99)  |                          |                          |                          |                          |
| <b>2 or more comorbidities</b> | 11.34 (6.13) | 1.214 (0.973 – 1.455)*** | 1.021 (0.772 – 1.269)*** | 1.020 (0.768 – 1.272)*** | 0.968 (0.720 – 1.216)*** |
| Ref: Less than 1 comorbidities | 10.12 (6.01) |                          |                          |                          |                          |

Note: \*\*\* p < .001; \*\* p < .01; \* p < .05

For peer review only



1  
2  
3 Figure 1. Comparison of number of physical health comorbidities (a) and specific physical  
4 comorbidities (b) by SMI diagnosis.  
5  
6  
7

8 Figure 2. Prevalence of the most prevalent physical health conditions across ethnicities within  
9 the SMI cohort and the SSD and BD subgroups.  
10  
11  
12

13 Figure 3. Visualization of most prevalent comorbidities in individuals with SMI and comorbid  
14 diabetes.  
15  
16

17 Figure 4. Visualization of most prevalent comorbidities in individuals with SMI and comorbid  
18 hypertension.  
19  
20  
21

22 Figure 5. Visualization of most prevalent comorbidities in individuals with SMI and comorbid  
23 asthma.  
24  
25  
26  
27  
28  
29  
30  
31  
32  
33  
34  
35  
36  
37  
38  
39  
40  
41  
42  
43  
44  
45  
46  
47  
48  
49  
50  
51  
52  
53  
54  
55  
56  
57  
58  
59  
60

a

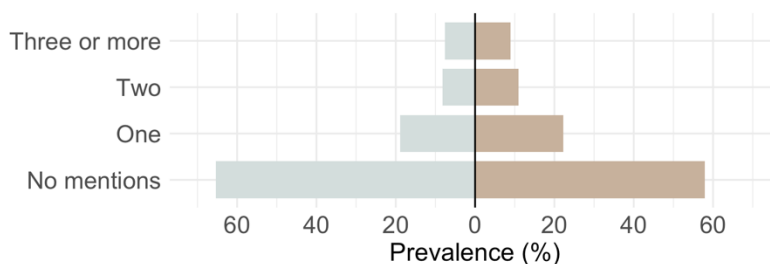

b

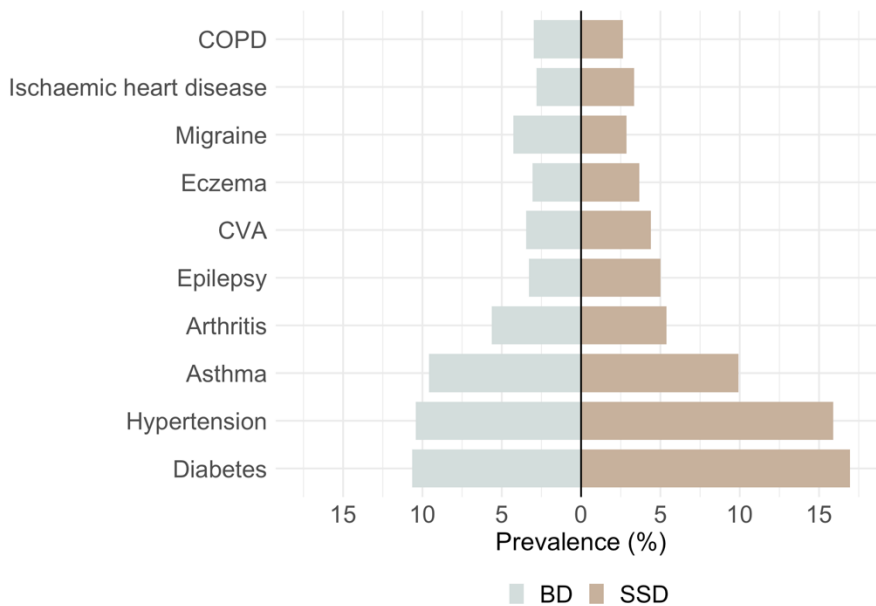

ew only

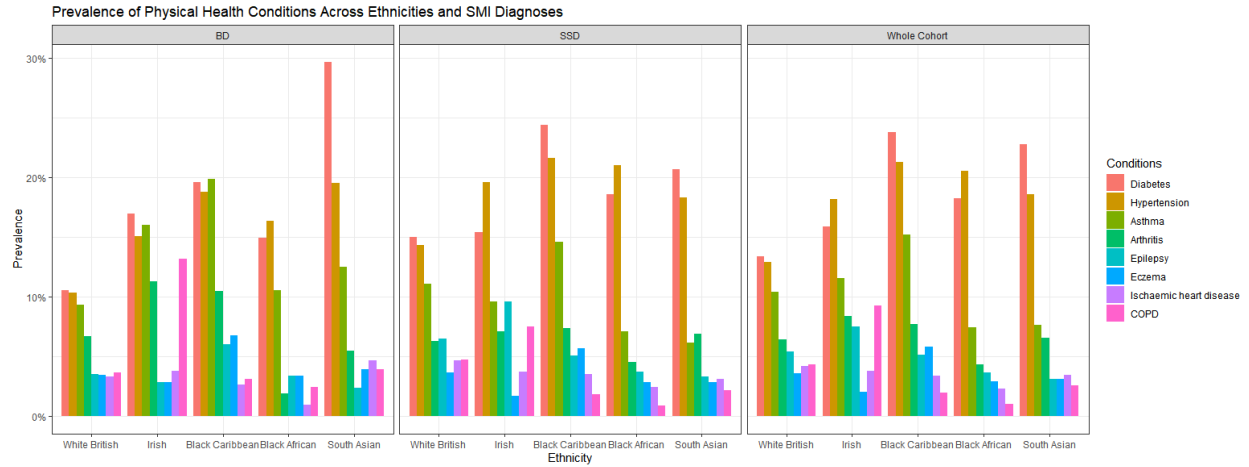

Figure 3. Visualization of most prevalent comorbidities in individuals with SMI and comorbid diabetes.

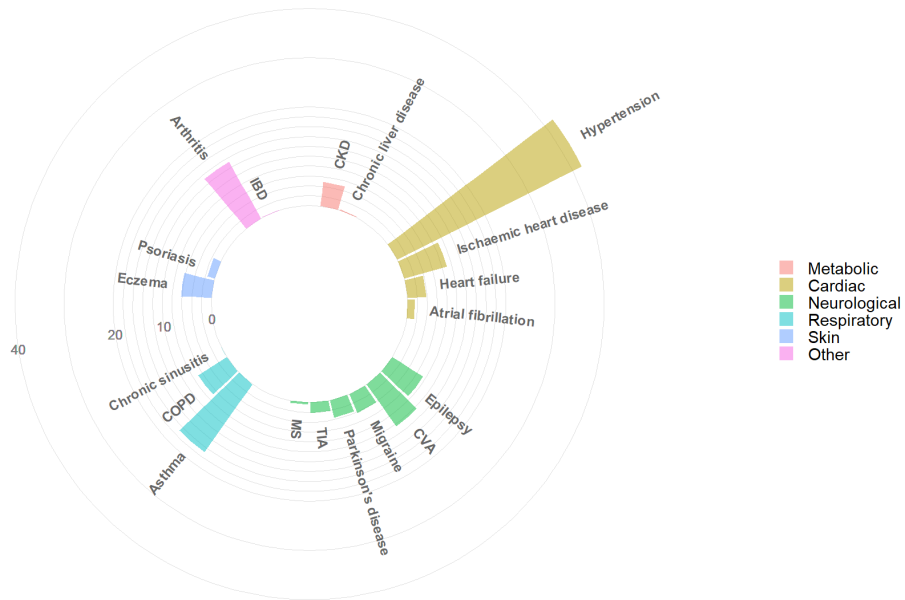

Figure 4. Visualization of most prevalent comorbidities in individuals with SMI and comorbid hypertension.

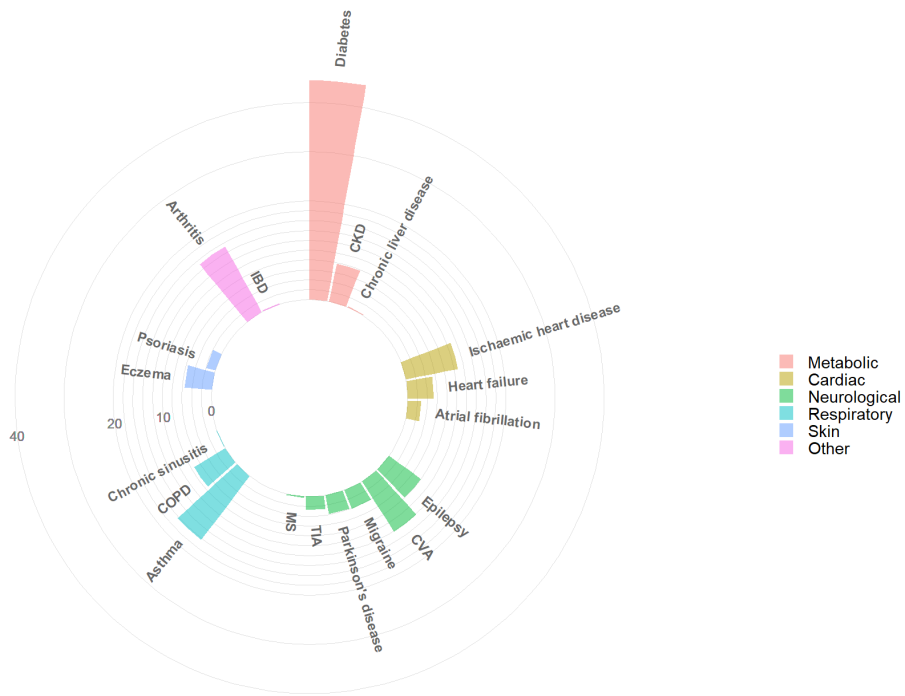

1  
2  
3  
4  
5  
6  
7  
8  
9  
10  
11  
12  
13  
14  
15  
16  
17  
18  
19  
20  
21  
22  
23  
24  
25  
26  
27  
28  
29  
30  
31  
32  
33  
34  
35  
36  
37  
38  
39  
40  
41  
42  
43  
44  
45  
46  
47  
48  
49  
50  
51  
52  
53  
54  
55  
56  
57  
58  
59  
60

For peer review

Figure 5. Visualization of most prevalent comorbidities in individuals with SMI and comorbid asthma.

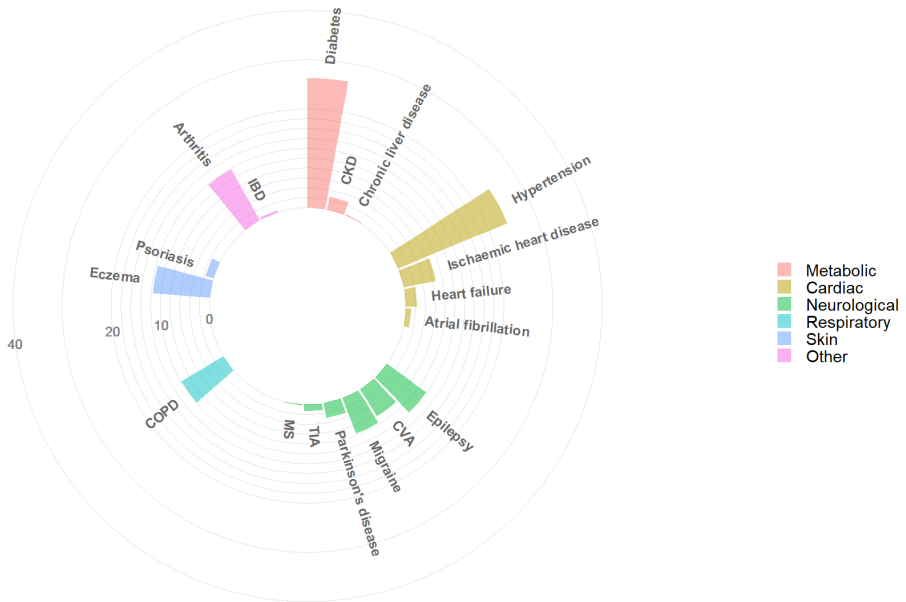

1  
2  
3  
4  
5  
6  
7  
8  
9  
10  
11  
12  
13  
14  
15  
16  
17  
18  
19  
20  
21  
22  
23  
24  
25  
26  
27  
28  
29  
30  
31  
32  
33  
34  
35  
36  
37  
38  
39  
40  
41  
42  
43  
44  
45  
46  
47  
48  
49  
50  
51  
52  
53  
54  
55  
56  
57  
58  
59  
60

For peer review only

1  
2  
3  
4  
5  
6  
7  
8  
9  
10  
11  
12  
13  
14  
15  
16  
17  
18  
19  
20  
21  
22  
23  
24  
25  
26  
27  
28  
29  
30  
31  
32  
33  
34  
35  
36  
37  
38  
39  
40  
41  
42  
43  
44  
45  
46  
47  
48  
49  
50  
51  
52  
53  
54  
55  
56  
57  
58  
59  
60

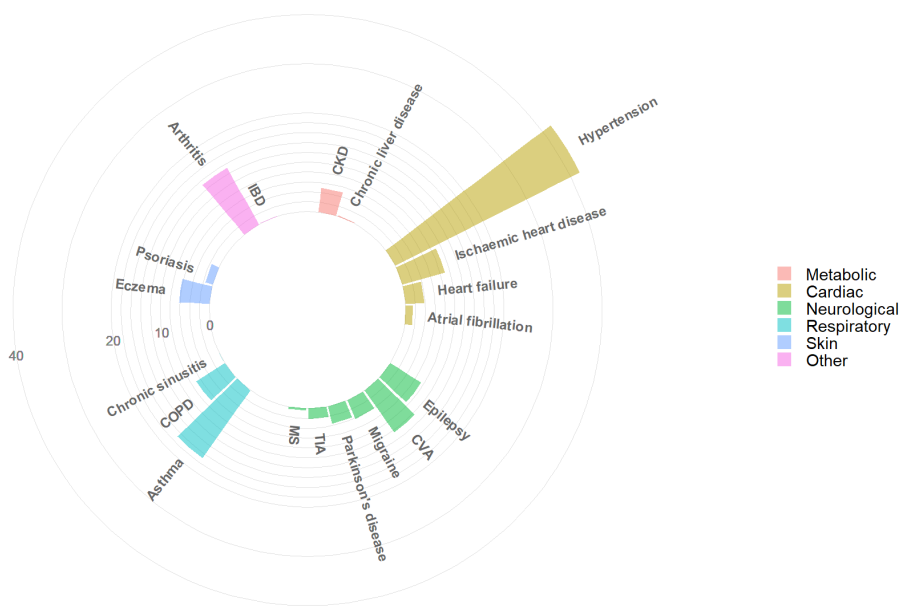

review only

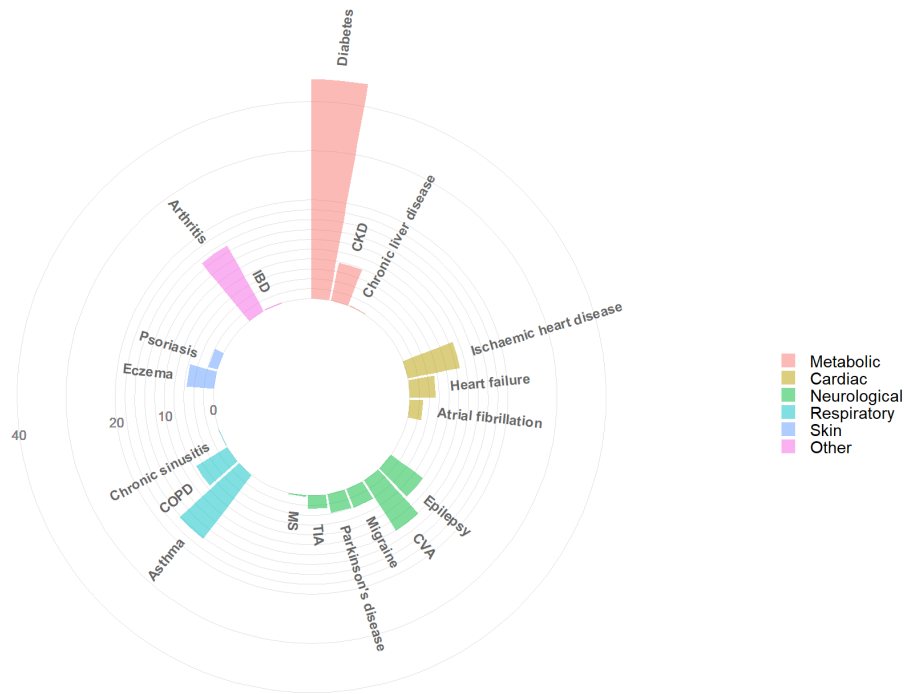

Review only



1  
2  
3  
4  
5  
6  
7  
8  
9  
10  
11  
12  
13  
14  
15  
16  
17  
18  
19  
20  
21  
22  
23  
24  
25  
26  
27  
28  
29  
30  
31  
32  
33  
34  
35  
36  
37  
38  
39  
40  
41  
42  
43  
44  
45  
46  
47  
48  
49  
50  
51  
52  
53  
54  
55  
56  
57  
58  
59  
60

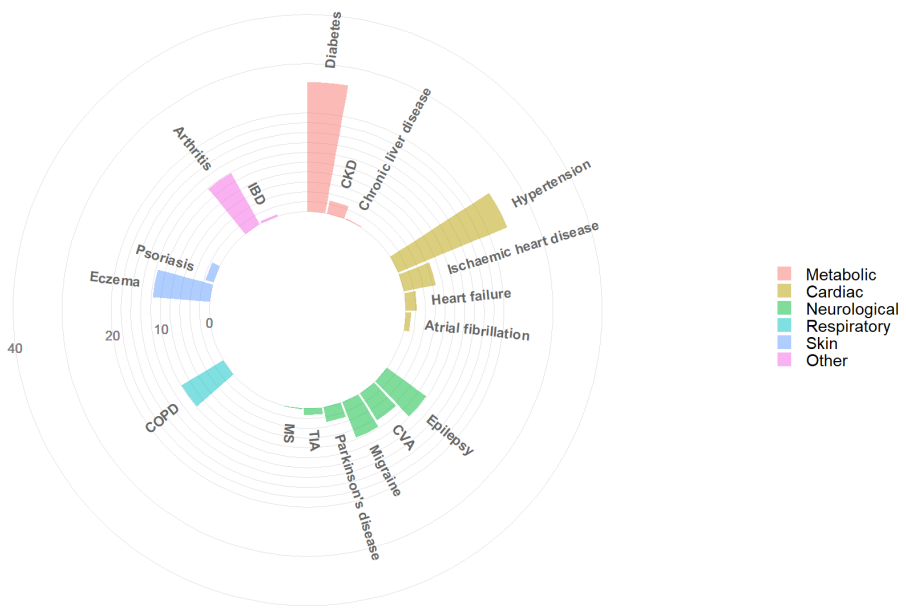

review only

## Supplemental Material

### Supplemental Tables

Supplemental Table 1. Meta-annotations performance results for Diagnosis and Status

Supplemental Table 2. Prevalence estimates and sex differences within the whole SMI cohort and SSD and BD subgroups.

Supplemental Table 3. Prevalence for each condition by age ranges at first SMI diagnosis for the whole SMI cohort and SSD and BD subgroups.

Supplemental Tables 4a, 4b and 4c. Prevalence for each condition across ethnicities for the whole SMI cohort and SSD and BD subgroups.

Supplemental Table 5. Social deprivation prevalence for each condition for the whole cohort and within SSD and BD.

Supplemental Table 6. Sociodemographic features of cohort in HoNOS subsample analysis

Supplemental Table 7. Associations between comorbidities and HoNOS scores in SSD.

Supplemental Table 8. Associations between comorbidities and HoNOS scores in BD.

### Supplemental Figures

Supplemental Figure 1. Distribution of all conditions in the SMI cohort by SMI group.

Supplemental Figure 2. Prevalence rates for age at SMI diagnoses per condition and comparison between individuals with BD and SSD.

**Appendix 1.** SNOMED Container and Concept Level Groupings for physical health conditions included in this study.

**Supplemental Tables***Supplemental Table 1. Meta-annotations performance results for Diagnosis and Status*

| <b>Meta-Annotation</b> | <b>Values</b>    | <b>F1<br/>(macro/weighted)</b> | <b>P (macro/weighted)</b> | <b>R (macro/weighted)</b> |
|------------------------|------------------|--------------------------------|---------------------------|---------------------------|
| Diagnosis              | Patient / Other  | 0.94 / 0.94                    | 0.95 / 0.95               | 0.92 / 0.94               |
| Status                 | Affirmed / Other | 0.89 / 0.98                    | 0.94 / 0.98               | 0.85 / 0.98               |

For peer review only

Supplemental Table 2. Prevalence estimates and sex differences within the whole SMI cohort and SSD and BD subgroups.

|                                          | Total Cohort   |                | SSD            |                | p-value | BD            |               | p-value |
|------------------------------------------|----------------|----------------|----------------|----------------|---------|---------------|---------------|---------|
|                                          | Female         | Male           | Female         | Male           |         | Female        | Male          |         |
| <b>Diabetes</b>                          | 1282<br>(15.8) | 1403<br>(15)   | 1021<br>(18.8) | 1187<br>(15.6) | <.001   | 261<br>(9.7)  | 216<br>(12.1) | .190    |
| <b>Hypertension ***</b>                  | 1325<br>(16.3) | 1212<br>(12.9) | 1060<br>(19.6) | 1010<br>(13.3) | <.001   | 265<br>(9.8)  | 202<br>(11.4) | 1.000   |
| <b>Asthma **</b>                         | 869<br>(10.7)  | 852<br>(9.1)   | 559<br>(10.3)  | 732<br>(9.6)   | 1.000   | 310<br>(11.5) | 120<br>(6.7)  | <.001   |
| <b>Arthritis ***</b>                     | 657<br>(8.1)   | 297<br>(3.2)   | 471<br>(8.7)   | 231<br>(3.0)   | <.001   | 186<br>(6.9)  | 66<br>(3.7)   | <.001   |
| <b>Epilepsy</b>                          | 349<br>(4.3)   | 450<br>(4.8)   | 253<br>(4.7)   | 399<br>(5.3)   | 1.000   | 96<br>(3.6)   | 51<br>(2.9)   | 1.000   |
| <b>Cerebrovascular diseases</b>          | 367<br>(4.5)   | 361<br>(3.9)   | 265<br>(4.9)   | 308<br>(4.1)   | .499    | 102<br>(3.8)  | 53<br>(3.0)   | 1.000   |
| <b>Eczema *</b>                          | 331<br>(4.1)   | 285<br>(3.0)   | 238<br>(4.4)   | 241<br>(3.2)   | <.01    | 93<br>(3.4)   | 44<br>(2.5)   | 1.000   |
| <b>Migraine ***</b>                      | 369<br>(4.5)   | 194<br>(2.1)   | 217<br>(4.0)   | 155<br>(2.0)   | <.001   | 152<br>(5.6)  | 39<br>(2.2)   | <.001   |
| <b>Ischaemic heart disease</b>           | 249<br>(3.1)   | 312<br>(3.3)   | 196<br>(3.6)   | 239<br>(3.1)   | 1.000   | 53<br>(2.0)   | 73<br>(4.2)   | <.001   |
| <b>Chronic Obstructive Lung diseases</b> | 237<br>(2.9)   | 239<br>(2.5)   | 153<br>(2.8)   | 189<br>(2.5)   | 1.000   | 84<br>(3.1)   | 50<br>(2.8)   | 1.000   |
| <b>Chronic Kidney disease</b>            | 158<br>(1.9)   | 121<br>(1.3)   | 104<br>(1.9)   | 75<br>(1.0)    | <.001   | 54<br>(2.0)   | 46<br>(2.6)   | 1.000   |
| <b>Parkinson disease</b>                 | 113<br>(1.4)   | 153<br>(1.6)   | 81<br>(1.5)    | 120<br>(1.6)   | 1.000   | 32<br>(1.2)   | 33<br>(1.9)   | 1.000   |
| <b>Heart failure</b>                     | 123<br>(1.5)   | 99<br>(1.0)    | 105<br>(1.9)   | 82<br>(1.1)    | .001    | 18<br>(0.7)   | 17<br>(1.0)   | 1.000   |
| <b>Psoriasis</b>                         | 76<br>(0.9)    | 103<br>(1.1)   | 45<br>(0.8)    | 84<br>(1.1)    | 1.000   | 31<br>(1.1)   | 19<br>(1.1)   | 1.000   |
| <b>Atrial fibrillation</b>               | 65<br>(0.8)    | 68<br>(0.7)    | 50<br>(0.9)    | 50<br>(0.7)    | 1.000   | 15<br>(0.6)   | 18<br>(1.0)   | 1.000   |
| <b>Transient Ischaemic Attack</b>        | 79<br>(1.0)    | 51<br>(0.5)    | 53<br>(1.0)    | 38<br>(0.5)    | .037    | 26<br>(1.0)   | 13<br>(0.7)   | 1.000   |
| <b>Inflammatory Bowel diseases</b>       | 26<br>(0.3)    | 14<br>(0.1)    | 18<br>(0.3)    | 7<br>(0.1)     | .080    | 8<br>(0.3)    | 7<br>(0.4)    | 1.000   |

|                              |             |             |            |             |   |            |            |   |
|------------------------------|-------------|-------------|------------|-------------|---|------------|------------|---|
| <b>Multiple Sclerosis</b>    | 17<br>(0.2) | 15<br>(0.2) | 9<br>(0.2) | 10<br>(0.1) | - | 8<br>(0.3) | 5<br>(0.3) | - |
| <b>Chronic liver disease</b> | 10<br>(0.1) | 12<br>(0.1) | 9          | 11<br>(0.1) | - | 1<br>(0.0) | 1<br>(0.1) | - |
| <b>Chronic Sinusitis</b>     | 3<br>(0.0)  | 3<br>(0.0)  | 3          | 3<br>(0.0)  | - | 0<br>(0.0) | 0<br>(0.0) | - |

Note. \*\*\*  $p < .001$ ; \*\*  $p < .01$ ; \*  $p < .05$  for comparisons between male and female groups in the whole SMI cohort

For peer review only

1  
2  
3 *Supplemental Table 3. Prevalence for each condition for the whole cohort and diagnoses*  
4 *subgroups and across age ranges at first SMI diagnosis.*  
5  
6  
7  
8  
9  
10  
11  
12  
13  
14  
15  
16  
17  
18  
19  
20  
21  
22  
23  
24  
25  
26  
27  
28  
29  
30  
31  
32  
33  
34  
35  
36  
37  
38  
39  
40  
41  
42  
43  
44  
45  
46  
47  
48  
49  
50  
51  
52  
53  
54  
55  
56  
57  
58  
59  
60

For peer review only

1  
2  
3  
4  
5  
6  
7  
8  
9  
10  
11  
12  
13  
14  
15  
16  
17  
18  
19  
20  
21  
22  
23  
24  
25  
26  
27  
28  
29  
30  
31  
32  
33  
34  
35  
36  
37  
38  
39  
40  
41  
42  
43  
44  
45  
46  
47

|                               | Total  |        |        |        |        | SSD    |        |        |        |        | BD    |        |        |        |        |        |       |
|-------------------------------|--------|--------|--------|--------|--------|--------|--------|--------|--------|--------|-------|--------|--------|--------|--------|--------|-------|
|                               | 15-34  | 35-44  | 45-54  | 55-64  | 65+    | 15-34  | 35-44  | 45-54  | 55-64  | 65+    | 15-34 | 35-44  | 45-54  | 55-64  | 65+    |        |       |
| <b>Total</b>                  | 7497   | 3736   | 2783   | 1525   | 1959   | 5607   | 2792   | 2057   | 1067   | 1496   |       | 1890   | 944    | 726    | 458    | 463    |       |
| <b>Diabetes***</b>            | 697    | 559    | 531    | 371    | 528    | 591    | 479    | 439    | 284    | 415    | p <   | 106    | 80     | 92     | 87     | 113    | p <   |
|                               | (9.3)  | (15.0) | (19.1) | (24.3) | (27.0) | (10.5) | (17.2) | (21.3) | (26.6) | (27.7) | 0.001 | (5.6)  | (8.5)  | (12.7) | (19.0) | (24.4) | 0.001 |
| <b>Hypertension***</b>        | 472    | 426    | 514    | 416    | 709    | 412    | 372    | 411    | 313    | 562    | p <   | 60     | 54     | 103    | 103    | 147    | p <   |
|                               | (6.3)  | (11.4) | (18.5) | (27.3) | (36.2) | (7.3)  | (13.3) | (20.0) | (29.3) | (37.6) | 0.001 | (3.2)  | (5.7)  | (14.2) | (22.5) | (31.7) | 0.001 |
| <b>Asthma***</b>              | 820    | 347    | 297    | 126    | 132    | 635    | 248    | 218    | 89     | 101    | p <   | 185    | 99     | 79     | 37     | 31     | p =   |
|                               | (10.9) | (9.3)  | (10.7) | (8.3)  | (6.7)  | (11.3) | (8.9)  | (10.6) | (8.3)  | (6.8)  | 0.001 | (9.8)  | (10.5) | (10.9) | (8.1)  | (6.7)  | 1.000 |
| <b>Arthritis***</b>           | 125    | 154    | 229    | 167    | 279    | 93     | 120    | 159    | 118    | 212    | p <   | 32     | 34     | 70     | 49     | 67     | p <   |
|                               | (1.7)  | (4.1)  | (8.2)  | (11.0) | (14.2) | (1.7)  | (4.3)  | (7.7)  | (11.1) | (14.2) | 0.001 | (1.7)  | (3.6)  | (9.6)  | (10.7) | (14.5) | 0.001 |
| <b>Epilepsy</b>               | 339    | 188    | 133    | 67     | 72     | 276    | 154    | 112    | 55     | 55     | 1.000 | 63     | 34     | 21     | 12     | 17     | 1.000 |
|                               | (4.5)  | (5.0)  | (4.8)  | (4.4)  | (3.7)  | (4.9)  | (5.5)  | (5.4)  | (5.2)  | (3.7)  |       | (3.3)  | (3.6)  | (2.9)  | (2.6)  | (3.7)  |       |
| <b>CVA***</b>                 | 166    | 112    | 122    | 114    | 214    | 143    | 87     | 95     | 84     | 164    | p <   | 23     | 25     | 27     | 30     | 50     | p <   |
|                               | (2.2)  | (3.0)  | (4.4)  | (7.5)  | (10.9) | (2.6)  | (3.1)  | (4.6)  | (7.9)  | (11.0) | 0.001 | (1.2)  | (2.6)  | (3.7)  | (6.6)  | (10.8) | 0.001 |
| <b>Eczema</b>                 | 310    | 115    | 79     | 50     | 62     | 244    | 88     | 58     | 37     | 52     | 0.120 | 66     | 27     | 21     | 13     | 10     | 1.000 |
|                               | (4.1)  | (3.1)  | (2.8)  | (3.3)  | (3.2)  | (4.4)  | (3.2)  | (2.8)  | (3.5)  | (3.5)  |       | (3.5)  | (2.9)  | (2.9)  | (2.8)  | (2.2)  |       |
| <b>Migraine***</b>            | 300    | 122    | 87     | 32     | 23     | 207    | 73     | 53     | 24     | 15     | p <   | 93     | 49     | 34     | 8      | 8      | 0.011 |
|                               | (4.0)  | (3.3)  | (3.1)  | (2.1)  | (1.2)  | (3.7)  | (2.6)  | (2.6)  | (2.2)  | (1.0)  | 0.001 | (4.9)  | (5.2)  | (4.7)  | (1.7)  | (1.7)  |       |
| <b>Isc heart disease***</b>   | 111    | 73     | 105    | 95     | 177    | 96     | 60     | 80     | 65     | 134    | p <   | 15     | 13     | 25     | 30     | 43     | p <   |
|                               | (1.5)  | (2.0)  | (3.8)  | (6.2)  | (9.0)  | (1.7)  | (2.1)  | (3.9)  | (6.1)  | (9.0)  | 0.001 | (0.8)  | (1.4)  | (3.4)  | (6.6)  | (9.3)  | 0.001 |
| <b>COPD***</b>                | 39     | 58     | 119    | 115    | 145    | 29     | 40     | 87     | 82     | 104    | p <   | 10     | 18     | 32     | 33     | 41     | p <   |
|                               | (0.5)  | (1.6)  | (4.3)  | (7.5)  | (7.4)  | (0.5)  | (1.4)  | (4.2)  | (7.7)  | (7.0)  | 0.001 | (0.5)  | (1.9)  | (4.4)  | (7.2)  | (8.9)  | 0.001 |
| <b>CKD***</b>                 | 12     | 18     | 41     | 55     | 153    | 9      | 14     | 28     | 33     | 95     | p <   | 3      | 4      | 13     | 22     | 58     | -     |
|                               | (0.2)  | (0.5)  | (1.5)  | (3.6)  | (7.8)  | (0.2)  | (0.5)  | (1.4)  | (3.1)  | (6.4)  | 0.001 | (0.2)  | (0.4)  | (1.8)  | (4.8)  | (12.5) |       |
| <b>PD***</b>                  | 70     | 33     | 37     | 41     | 85     | 57     | 22     | 27     | 32     | 63     | p <   | 13     | 11     | 10     | 9      | 22     | p <   |
|                               | (0.9)  | (0.9)  | (1.3)  | (2.7)  | (4.3)  | (1.0)  | (0.8)  | (1.3)  | (3.0)  | (4.2)  | 0.001 | (0.7)  | (1.2)  | (1.4)  | (2.0)  | (4.8)  | 0.001 |
| <b>HF***</b>                  | 18     | 30     | 42     | 40     | 92     | 17     | 30     | 38     | 29     | 73     | p <   | 1      | 0      | 4      | 11     | 19     | -     |
|                               | (0.2)  | (0.8)  | (1.5)  | (2.6)  | (4.7)  | (0.3)  | (1.1)  | (1.8)  | (2.7)  | (4.9)  | 0.001 | (0.1)  | (0.0)  | (0.6)  | (2.4)  | (4.1)  |       |
| <b>Psoriasis</b>              | 67     | 33     | 37     | 17     | 25     | 54     | 25     | 25     | 9      | 16     | 1.000 | 13     | 8      | 12     | 8      | 9      | 0.450 |
|                               | (0.9)  | (0.9)  | (1.3)  | (1.1)  | (1.3)  | (1.0)  | (0.9)  | (1.2)  | (0.8)  | (1.1)  |       | (0.7)  | (0.8)  | (1.7)  | (1.7)  | (1.9)  |       |
| <b>Atrial fibrillation***</b> | 14     | 7      | 12     | 19     | 81     | 11     | 6      | 8      | 12     | 63     | p <   | 3      | 1      | 4      | 7      | 18     | -     |
|                               | (0.2)  | (0.2)  | (0.4)  | (1.2)  | (4.1)  | (0.2)  | (0.2)  | (0.4)  | (0.1)  | (4.2)  | 0.001 | (0.20) | (0.1)  | (0.6)  | (1.5)  | (3.9)  |       |
| <b>TIA***</b>                 | 20     | 18     | 19     | 23     | 50     | 15     | 15     | 13     | 14     | 34     | p <   | 5      | 3      | 6      | 9      | 16     | -     |
|                               | (0.3)  | (0.5)  | (0.7)  | (1.5)  | (2.6)  | (0.3)  | (0.5)  | (0.6)  | (1.3)  | (2.3)  | 0.001 | (0.3)  | (0.3)  | (0.8)  | (2.0)  | (3.5)  |       |
| <b>IBD</b>                    | 9      | 8      | 12     | 6      | 5      | 4      | 6      | 7      | 3      | 5      | -     | 5      | 2      | 5      | 3      | 0      | -     |
|                               | (0.1)  | (0.2)  | (0.4)  | (0.4)  | (0.3)  | (0.1)  | (0.2)  | (0.3)  | (0.3)  | (0.3)  |       | (0.3)  | (0.2)  | (0.7)  | (0.7)  | (0.0)  |       |
| <b>MS</b>                     | 6      | 8      | 11     | 5      | 2      | 4      | 4      | 8      | 3      | 0      | -     | 2      | 4      | 3      | 2      | 2      | -     |
|                               | (0.1)  | (0.2)  | (0.4)  | (0.3)  | (0.1)  | (0.1)  | (0.1)  | (0.4)  | (0.3)  | (0.0)  |       | (0.1)  | (0.4)  | (0.4)  | (0.4)  | (0.4)  |       |

|                              |            |            |            |            |            |            |            |            |            |            |   |            |            |            |            |            |   |
|------------------------------|------------|------------|------------|------------|------------|------------|------------|------------|------------|------------|---|------------|------------|------------|------------|------------|---|
| <b>Chronic liver disease</b> | 5<br>(0.1) | 7<br>(0.2) | 6<br>(0.2) | 3<br>(0.2) | 1<br>(0.1) | 5<br>(0.1) | 7<br>(0.3) | 5<br>(0.2) | 2<br>(0.2) | 1<br>(0.1) | - | 0<br>(0.0) | 0<br>(0.0) | 1<br>(0.1) | 1<br>(0.2) | 0<br>(0.0) | - |
| <b>Chronic sinusitis</b>     | 5<br>(0.1) | 0<br>(0.0) | 1<br>(0.0) | 0<br>(0.0) | 0<br>(0.0) | 5<br>(0.1) | 0<br>(0.0) | 1<br>(0.0) | 0<br>(0.0) | 0<br>(0.0) | - | 0<br>(0.0) | 0<br>(0.0) | 0<br>(0.0) | 0<br>(0.0) | 0<br>(0.0) | - |

Note: \*\*\* p < .001; \*\* p < .01; \* p < .05 for comparisons between age groups within the SMI cohort.

For peer review only



Supplemental Tables 4. Prevalence for each condition for the whole cohort and diagnoses subgroups and across ethnicities

Table 4a. Prevalence for each condition for the whole cohort and ethnicity.

|                                 | White<br>British<br>n=6243<br>(35.7%) | Irish<br>n=346<br>(2.0%) | Black<br>Caribbean<br>n=3182<br>(18.2%) | Black<br>African<br>n=2094<br>(12.0%) | South<br>Asian<br>n=549<br>(3.1%) | Other <sup>§</sup><br>n=2846<br>(22.0%) | Unknown <sup>§</sup><br>n=1240<br>(7.1%) | Statistics                         |
|---------------------------------|---------------------------------------|--------------------------|-----------------------------------------|---------------------------------------|-----------------------------------|-----------------------------------------|------------------------------------------|------------------------------------|
| <b>Diabetes</b>                 | 837 (13.4)                            | 55 (15.9)                | 757 (23.8)                              | 382 (18.2)                            | 125 (22.8)                        | 461 (12.0)                              | 69 (5.6)                                 | $\chi^2$ (4) = 172.49; $p < 0.001$ |
| <b>Hypertension</b>             | 804 (12.9)                            | 63 (18.2)                | 678 (21.3)                              | 430 (20.5)                            | 102 (18.6)                        | 400 (10.4)                              | 60 (4.8)                                 | $\chi^2$ (4) = 137.98; $p < 0.001$ |
| <b>Asthma</b>                   | 651 (10.4)                            | 40 (11.6)                | 484 (15.2)                              | 156 (7.4)                             | 42 (7.7)                          | 296 (7.7)                               | 53 (4.3)                                 | $\chi^2$ (4) = 92.58; $p < 0.001$  |
| <b>Arthritis</b>                | 402 (6.4)                             | 29 (8.4)                 | 246 (7.7)                               | 90 (4.3)                              | 36 (6.6)                          | 139 (3.6)                               | 12 (1.0)                                 | $\chi^2$ (4) = 26.80; $p < 0.001$  |
| <b>Epilepsy</b>                 | 339 (5.4)                             | 26 (7.5)                 | 164 (5.2)                               | 77 (3.7)                              | 17 (3.1)                          | 147 (3.8)                               | 29 (2.4)                                 | $\chi^2$ (4) = 19.02; $p = 0.010$  |
| <b>Cerebrovascular accident</b> | 274 (4.4)                             | 20 (5.8)                 | 184 (5.8)                               | 92 (4.4)                              | 25 (4.6)                          | 116 (3.0)                               | 17 (1.4)                                 | $\chi^2$ (4) = 10.60; $p = 0.408$  |
| <b>Eczema</b>                   | 222 (3.6)                             | 7 (2.0)                  | 185 (5.8)                               | 61 (2.9)                              | 17 (3.1)                          | 108 (2.8)                               | 16 (1.3)                                 | $\chi^2$ (4) = 41.93; $p < 0.001$  |
| <b>Migraine</b>                 | 235 (3.8)                             | 12 (3.5)                 | 129 (4.1)                               | 61 (2.9)                              | 17 (3.1)                          | 98 (2.5)                                | 12 (1.0)                                 | $\chi^2$ (4) = 5.44; $p > .99$     |
| <b>Ischemic heart disease</b>   | 261 (4.2)                             | 13 (3.8)                 | 108 (3.4)                               | 48 (2.3)                              | 19 (3.5)                          | 99 (2.6)                                | 13 (1.0)                                 | $\chi^2$ (4) = 16.74; $p = 0.028$  |
| <b>COPD</b>                     | 271 (4.3)                             | 32 (9.2)                 | 63 (2.0)                                | 21 (1.0)                              | 14 (2.6)                          | 60 (1.6)                                | 15 (1.2)                                 | $\chi^2$ (4) = 114.69; $p < 0.001$ |
| <b>CKD</b>                      | 125 (2.0)                             | 9 (2.6)                  | 56 (1.8)                                | 32 (1.5)                              | 13 (2.4)                          | 37 (1.0)                                | 7 (0.6)                                  | $\chi^2$ (4) = 3.81; $p > .99$     |
| <b>Parkinson's disease</b>      | 117 (1.9)                             | 6 (1.7)                  | 56 (1.8)                                | 25 (1.2)                              | 11 (2.0)                          | 45 (1.2)                                | 6 (0.5)                                  | $\chi^2$ (4) = 4.56; $p > .99$     |
| <b>Heart failure</b>            | 88 (1.4)                              | 8 (2.3)                  | 55 (1.7)                                | 29 (1.4)                              | 8 (1.5)                           | 31 (0.8)                                | 3 (0.2)                                  | $\chi^2$ (4) = 3.16; $p > .99$     |
| <b>Psoriasis</b>                | 103 (1.6)                             | 4 (1.2)                  | 12 (0.4)                                | 6 (0.3)                               | 5 (0.9)                           | 44 (1.1)                                | 5 (0.4)                                  | *                                  |
| <b>Atrial fibrillation</b>      | 69 (1.1)                              | 9 (2.6)                  | 23 (0.7)                                | 11 (0.5)                              | 2 (0.4)                           | 15 (0.4)                                | 4 (0.3)                                  | *                                  |

|                              |          |         |          |          |         |          |         |   |
|------------------------------|----------|---------|----------|----------|---------|----------|---------|---|
| <b>TIA</b>                   | 58 (0.9) | 7 (2.0) | 24 (0.8) | 15 (0.7) | 7 (1.3) | 13 (0.3) | 6 (0.5) | * |
| <b>IBD</b>                   | 24 (0.4) | 1 (0.3) | 2 (0.1)  | 2 (0.1)  | 1 (0.2) | 9 (0.2)  | 1 (0.1) | * |
| <b>Multiple sclerosis</b>    | 21 (0.3) | 1 (0.3) | 3 (0.1)  | 1 (0.0)  | 0 (0.0) | 4 (0.1)  | 2 (0.2) | * |
| <b>Chronic liver disease</b> | 9 (0.1)  | 1 (0.3) | 1 (0.0)  | 6 (0.3)  | 0 (0.0) | 5 (0.1)  | 0 (0.0) | * |
| <b>Chronic sinusitis</b>     | 1 (0.0)  | 0 (0.0) | 3 (0.1)  | 1 (0.0)  | 0 (0.0) | 1 (0.0)  | 0 (0.0) | * |

§Categories were dropped for statistical analysis. \* $\chi^2$  test not performed due to small population sizes

Table 4b. Prevalence for each condition across ethnicities in SSD.

|                                     | <b>White<br/>British<br/>n=4008<br/>(30.8%)</b> | <b>Irish<br/>n=240<br/>(1.8%)</b> | <b>Black<br/>Caribbean<br/>n=2799<br/>(21.5%)</b> | <b>Black<br/>African<br/>n=1886<br/>(14.5%)</b> | <b>South<br/>Asian<br/>n=421<br/>(3.2%)</b> | <b>Other<sup>§</sup><br/>n=2822<br/>(21.7%)</b> | <b>Unknown<sup>§</sup><br/>n=843<br/>(6.5%)</b> | <b>Statistics</b>                     |
|-------------------------------------|-------------------------------------------------|-----------------------------------|---------------------------------------------------|-------------------------------------------------|---------------------------------------------|-------------------------------------------------|-------------------------------------------------|---------------------------------------|
| <b>Diabetes</b>                     | 602 (15.0)                                      | 37 (15.4)                         | 682 (24.4)                                        | 351 (18.6)                                      | 87 (20.7)                                   | 390 (13.8)                                      | 59 (7.0)                                        | $\chi^2$ (4) =<br>97.10; $p < 0.001$  |
| <b>Hypertension</b>                 | 573 (14.3)                                      | 47 (19.6)                         | 606 (21.7)                                        | 396 (21.0)                                      | 77 (18.3)                                   | 322 (11.4)                                      | 49 (5.8)                                        | $\chi^2$ (4) =<br>73.74; $p < 0.001$  |
| <b>Asthma</b>                       | 443 (11.1)                                      | 23 (9.6)                          | 408 (14.6)                                        | 134 (7.1)                                       | 26 (6.2)                                    | 217 (7.7)                                       | 40 (4.7)                                        | $\chi^2$ (4) =<br>75.96; $p < 0.001$  |
| <b>Arthritis</b>                    | 252 (6.3)                                       | 17 (7.1)                          | 206 (7.4)                                         | 86 (4.6)                                        | 29 (6.9)                                    | 103 (3.6)                                       | 9 (1.1)                                         | $\chi^2$ (4) =<br>15.48; $p = 0.038$  |
| <b>Epilepsy</b>                     | 261 (6.5)                                       | 23 (9.6)                          | 141 (5.0)                                         | 70 (3.7)                                        | 14 (3.3)                                    | 117 (4.1)                                       | 26 (3.1)                                        | $\chi^2$ (4) =<br>32.45; $p < 0.001$  |
| <b>Cerebrovascular<br/>accident</b> | 188 (4.7)                                       | 15 (6.2)                          | 159 (5.7)                                         | 82 (4.3)                                        | 18 (4.3)                                    | 96 (3.4)                                        | 15 (1.8)                                        | $\chi^2$ (4) =<br>6.48; $p > 0.99$    |
| <b>Eczema</b>                       | 145 (3.6)                                       | 4 (1.7)                           | 159 (5.7)                                         | 54 (2.9)                                        | 12 (2.9)                                    | 93 (3.3)                                        | 12 (1.4)                                        | $\chi^2$ (4) =<br>33.32; $p < 0.001$  |
| <b>Migraine</b>                     | 126 (3.1)                                       | 10 (4.2)                          | 110 (3.9)                                         | 48 (2.5)                                        | 12 (2.9)                                    | 59 (2.1)                                        | 7 (0.8)                                         | $\chi^2$ (4) =<br>8.03; $p = 0.904$   |
| <b>Ischemic heart disease</b>       | 187 (4.7)                                       | 9 (3.8)                           | 98 (3.5)                                          | 46 (2.4)                                        | 13 (3.1)                                    | 74 (2.6)                                        | 8 (0.9)                                         | $\chi^2$ (4) =<br>19.15; $p = 0.007$  |
| <b>COPD</b>                         | 190 (4.7)                                       | 18 (7.5)                          | 51 (1.8)                                          | 16 (0.8)                                        | 9 (2.1)                                     | 44 (1.6)                                        | 14 (1.7)                                        | $\chi^2$ (4) =<br>101.62; $p < 0.001$ |
| <b>CKD</b>                          | 64 (1.6)                                        | 5 (2.1)                           | 45 (1.6)                                          | 26 (1.4)                                        | 10 (2.4)                                    | 24 (0.9)                                        | 5 (0.6)                                         | *                                     |
| <b>Parkinson's disease</b>          | 79 (2.0)                                        | 4 (1.7)                           | 49 (1.8)                                          | 21 (1.1)                                        | 6 (1.4)                                     | 36 (1.3)                                        | 6 (0.7)                                         | *                                     |

|                              |          |         |          |          |         |          |         |   |
|------------------------------|----------|---------|----------|----------|---------|----------|---------|---|
| <b>Heart failure</b>         | 65 (1.6) | 8 (3.3) | 50 (1.8) | 28 (1.5) | 7 (1.7) | 26 (0.9) | 3 (0.4) | * |
| <b>Psoriasis</b>             | 66 (1.6) | 2 (0.8) | 9 (0.3)  | 6 (0.3)  | 4 (1.0) | 37 (1.3) | 5 (0.6) | * |
| <b>Atrial fibrillation</b>   | 46 (1.1) | 7 (2.9) | 22 (0.8) | 11 (0.6) | 1 (0.2) | 10 (0.4) | 3 (0.4) | * |
| <b>TIA</b>                   | 34 (0.8) | 5 (2.1) | 21 (0.8) | 13 (0.7) | 6 (1.4) | 8 (0.3)  | 4 (0.5) | * |
| <b>IBD</b>                   | 12 (0.3) | 1 (0.4) | 2 (0.1)  | 2 (0.1)  | 1 (0.2) | 6 (0.2)  | 1 (0.1) | * |
| <b>Multiple sclerosis</b>    | 12 (0.3) | 1 (0.4) | 3 (0.1)  | 0 (0.0)  | 0 (0.0) | 2 (0.1)  | 1 (0.1) | * |
| <b>Chronic liver disease</b> | 7 (0.2)  | 1 (0.4) | 1 (0.0)  | 6 (0.3)  | 0 (0.0) | 5 (0.2)  | 0 (0.0) | * |
| <b>Chronic sinusitis</b>     | 1 (0.0)  | 0 (0.0) | 3 (0.1)  | 1 (0.1)  | 0 (0.0) | 1 (0.0)  | 0 (0.0) | * |

§Categories were dropped for statistical analysis. \* $\chi^2$  test not performed due to small population sizes

Table 4c. Prevalence for each condition across ethnicities in BD.

|                                 | <b>White<br/>British<br/>n=2235<br/>(49.9%)</b> | <b>Irish<br/>n=106<br/>(2.4%)</b> | <b>Black<br/>Caribbean<br/>n=383<br/>(8.5%)</b> | <b>Black<br/>African<br/>n=208<br/>(4.6%)</b> | <b>South<br/>Asian<br/>n=128<br/>(2.9%)</b> | <b>Other<sup>§</sup><br/>n=1024<br/>(22.9%)</b> | <b>Unknown<sup>§</sup><br/>n=397<br/>(8.9%)</b> | <b>Statistics</b>                    |
|---------------------------------|-------------------------------------------------|-----------------------------------|-------------------------------------------------|-----------------------------------------------|---------------------------------------------|-------------------------------------------------|-------------------------------------------------|--------------------------------------|
| <b>Diabetes</b>                 | 235 (10.5)                                      | 18 (17.0)                         | 75 (19.6)                                       | 31 (14.9)                                     | 38 (29.7)                                   | 71 (6.9)                                        | 10 (2.5)                                        | $\chi^2$ (4) =<br>60.65; $p < 0.001$ |
| <b>Hypertension</b>             | 231 (10.3)                                      | 16 (15.1)                         | 72 (18.8)                                       | 34 (16.3)                                     | 25 (19.5)                                   | 78 (7.6)                                        | 11 (2.8)                                        | $\chi^2$ (4) =<br>32.99; $p < 0.001$ |
| <b>Asthma</b>                   | 208 (9.3)                                       | 17 (16.0)                         | 76 (19.8)                                       | 22 (10.6)                                     | 16 (12.5)                                   | 79 (7.7)                                        | 13 (3.3)                                        | $\chi^2$ (4) =<br>39.95; $p < 0.001$ |
| <b>Arthritis</b>                | 150 (6.7)                                       | 12 (11.3)                         | 40 (10.4)                                       | 4 (1.9)                                       | 7 (5.5)                                     | 36 (3.5)                                        | 3 (0.8)                                         | $\chi^2$ (4) =<br>19.09; $p = 0.004$ |
| <b>Epilepsy</b>                 | 78 (3.5)                                        | 3 (2.8)                           | 23 (6.0)                                        | 7 (3.4)                                       | 3 (2.3)                                     | 30 (2.9)                                        | 3 (0.8)                                         | *                                    |
| <b>Cerebrovascular accident</b> | 86 (3.8)                                        | 5 (4.7)                           | 25 (6.5)                                        | 10 (4.8)                                      | 7 (5.5)                                     | 20 (2.0)                                        | 2 (0.5)                                         | *                                    |
| <b>Eczema</b>                   | 77 (3.4)                                        | 3 (2.8)                           | 26 (6.8)                                        | 7 (3.4)                                       | 5 (3.9)                                     | 15 (1.5)                                        | 4 (1.0)                                         | *                                    |
| <b>Migraine</b>                 | 109 (4.9)                                       | 2 (1.9)                           | 19 (5.0)                                        | 13 (6.2)                                      | 5 (3.9)                                     | 39 (3.8)                                        | 5 (1.3)                                         | $\chi^2$ (4) =<br>3.17; $p > 0.99$   |
| <b>Ischemic heart disease</b>   | 74 (3.3)                                        | 4 (3.8)                           | 10 (2.6)                                        | 2 (1.0)                                       | 6 (4.7)                                     | 25 (2.4)                                        | 5 (1.3)                                         | *                                    |

|                              |          |           |          |         |         |          |         |   |
|------------------------------|----------|-----------|----------|---------|---------|----------|---------|---|
| <b>COPD</b>                  | 81 (3.6) | 14 (13.2) | 12 (3.1) | 5 (2.4) | 5 (3.9) | 16 (1.6) | 1 (0.3) | * |
| <b>CKD</b>                   | 61 (2.7) | 4 (3.8)   | 11 (2.9) | 6 (2.9) | 3 (2.3) | 13 (1.3) | 2 (0.5) | * |
| <b>Parkinson's disease</b>   | 38 (1.7) | 2 (1.9)   | 7 (1.8)  | 4 (1.9) | 5 (3.9) | 9 (0.9)  | 0 (0.0) | * |
| <b>Heart failure</b>         | 23 (1.0) | 0 (0.0)   | 5 (1.3)  | 1 (0.5) | 1 (0.8) | 5 (0.5)  | 0 (0.0) | * |
| <b>Psoriasis</b>             | 37 (1.7) | 2 (1.9)   | 3 (0.8)  | 0 (0.0) | 1 (0.8) | 7 (0.7)  | 0 (0.0) | * |
| <b>Atrial fibrillation</b>   | 23 (1.0) | 2 (1.9)   | 1 (0.3)  | 0 (0.0) | 1 (0.8) | 5 (0.5)  | 1 (0.3) | * |
| <b>TIA</b>                   | 24 (1.1) | 2 (1.9)   | 3 (0.8)  | 2 (1.0) | 1 (0.8) | 5 (0.5)  | 2 (0.5) | * |
| <b>IBD</b>                   | 12 (0.5) | 0 (0.0)   | 0 (0.0)  | 0 (0.0) | 0 (0.0) | 3 (0.3)  | 0 (0.0) | * |
| <b>Multiple sclerosis</b>    | 9 (0.4)  | 0 (0.0)   | 0 (0.0)  | 1 (0.5) | 0 (0.0) | 2 (0.2)  | 1 (0.3) | * |
| <b>Chronic liver disease</b> | 2 (0.1)  | 0 (0.0)   | 0 (0.0)  | 0 (0.0) | 0 (0.0) | 0 (0.0)  | 0 (0.0) | * |
| <b>Chronic sinusitis</b>     | 0 (0.0)  | 0 (0.0)   | 0 (0.0)  | 0 (0.0) | 0 (0.0) | 0 (0.0)  | 0 (0.0) | * |

\*Categories were dropped for statistical analysis. \* $\chi^2$  test not performed due to small population sizes

Supplemental Table 5. Social deprivation prevalence for each condition for the whole cohort and within SSD and AD.

|                                | Total cohort             |            |            |             |                         |                               | SSD                      |            |            |             |                         |                               | AD                                 |                          |           |            |            |                         |                               |                                    |
|--------------------------------|--------------------------|------------|------------|-------------|-------------------------|-------------------------------|--------------------------|------------|------------|-------------|-------------------------|-------------------------------|------------------------------------|--------------------------|-----------|------------|------------|-------------------------|-------------------------------|------------------------------------|
|                                | 1 - least deprived n (%) | 2 n (%)    | 3 n (%)    | 4 n (%)     | 5 - most deprived n (%) | Not stated <sup>s</sup> n (%) | 1 - least deprived n (%) | 2 n (%)    | 3 n (%)    | 4 n (%)     | 5 - most deprived n (%) | Not stated <sup>s</sup> n (%) | Chi square                         | 1 - least deprived n (%) | 2 n (%)   | 3 n (%)    | 4 n (%)    | 5 - most deprived n (%) | Not stated <sup>s</sup> n (%) | Chi square                         |
| <b>Total</b>                   | 742 (100)                | 1384 (100) | 3575 (100) | 7073 (100)  | 4033 (100)              | 693 (100)                     | 412 (100)                | 887 (100)  | 2503 (100) | 5476 (100)  | 3204 (100)              | 537 (100)                     |                                    | 330 (100)                | 497 (100) | 1072 (100) | 1597 (100) | 829 (100)               | 156 (100)                     |                                    |
| <b>Diabetes ***</b>            | 62 (8.4)                 | 169 (12.2) | 528 (14.8) | 1201 (17.0) | 698 (17.3)              | 28 (4.0)                      | 49 (11.9)                | 117 (13.2) | 409 (16.3) | 1019 (18.6) | 594 (18.5)              | 20 (3.7)                      | X <sup>2</sup> (4) = 29.7; p<0.001 | 13 (3.9)                 | 52 (10.5) | 119 (11.1) | 182 (11.4) | 104 (12.5)              | 8 (5.1)                       | X <sup>2</sup> (4) = 19.4; p=0.007 |
| <b>Hypertension ***</b>        | 77 (10.4)                | 154 (11.1) | 468 (13.1) | 1189 (16.8) | 627 (15.5)              | 22 (3.2)                      | 51 (12.4)                | 108 (12.2) | 368 (14.7) | 1008 (18.4) | 517 (16.1)              | 18 (3.4)                      | X <sup>2</sup> (4) = 37.8; p<0.001 | 26 (7.9)                 | 46 (9.3)  | 100 (9.3)  | 181 (11.3) | 110 (13.3)              | 4 (2.6)                       | X <sup>2</sup> (4) = 12.3; p=0.17  |
| <b>Asthma ***</b>              | 42 (5.7)                 | 95 (6.9)   | 361 (10.1) | 758 (10.7)  | 432 (10.7)              | 34 (4.9)                      | 27 (6.6)                 | 61 (6.9)   | 251 (10.0) | 589 (10.8)  | 337 (10.5)              | 26 (4.8)                      | X <sup>2</sup> (4) = 19.0; p=0.01  | 15 (4.5)                 | 34 (6.8)  | 110 (10.3) | 169 (10.6) | 95 (11.5)               | 8 (5.1)                       | X <sup>2</sup> (4) = 19.2; p=0.008 |
| <b>Arthritis</b>               | 36 (4.9)                 | 56 (4.0)   | 188 (5.3)  | 411 (5.8)   | 256 (6.3)               | 7 (1.0)                       | 18 (4.4)                 | 36 (4.1)   | 135 (5.4)  | 312 (5.7)   | 197 (6.1)               | 4 (0.7)                       | X <sup>2</sup> (4) = 7.30; p>0.99  | 18 (5.5)                 | 20 (4.0)  | 53 (4.9)   | 99 (6.2)   | 59 (7.1)                | 3 (1.9)                       | X <sup>2</sup> (4) = 7.51; p>0.99  |
| <b>Epilepsy</b>                | 32 (4.3)                 | 50 (3.6)   | 160 (4.5)  | 344 (4.9)   | 202 (5.0)               | 11 (1.2)                      | 24 (5.8)                 | 40 (4.5)   | 123 (4.9)  | 292 (5.3)   | 164 (5.1)               | 9 (1.7)                       | X <sup>2</sup> (4) = 1.79; p>0.99  | 8 (2.4)                  | 10 (2.0)  | 37 (3.5)   | 52 (3.3)   | 38 (4.6)                | 2 (1.3)                       | X <sup>2</sup> (4) = 7.59; p>0.99  |
| <b>CVA</b>                     | 19 (2.6)                 | 52 (3.8)   | 146 (4.1)  | 328 (4.6)   | 180 (4.5)               | 3 (0.4)                       | 12 (2.9)                 | 33 (3.7)   | 107 (4.3)  | 272 (5.0)   | 146 (4.6)               | 3 (0.6)                       | X <sup>2</sup> (4) = 6.55; p>0.99  | 7 (2.1)                  | 19 (3.8)  | 39 (3.6)   | 56 (3.5)   | 34 (4.1)                | 0                             | X <sup>2</sup> (4) = 2.80; p>0.99  |
| <b>Eczema</b>                  | 22 (3.0)                 | 45 (3.3)   | 120 (3.4)  | 273 (3.9)   | 147 (3.6)               | 9 (1.3)                       | 17 (4.1)                 | 34 (3.8)   | 86 (3.4)   | 212 (3.9)   | 123 (3.8)               | 7 (1.3)                       | X <sup>2</sup> (4) = 1.11; p>0.99  | 5 (1.5)                  | 11 (2.2)  | 34 (3.2)   | 61 (3.8)   | 24 (2.9)                | 2 (1.3)                       | X <sup>2</sup> (4) = 6.90; p>0.99  |
| <b>Migraine</b>                | 17 (2.3)                 | 39 (2.8)   | 121 (3.4)  | 243 (3.4)   | 140 (3.5)               | 4 (0.6)                       | 11 (2.7)                 | 20 (2.3)   | 63 (2.5)   | 176 (3.2)   | 99 (3.1)                | 3 (0.6)                       | X <sup>2</sup> (4) = 4.79; p>0.99  | 6 (1.8)                  | 19 (3.8)  | 58 (5.4)   | 67 (4.2)   | 41 (4.9)                | 1 (0.6)                       | X <sup>2</sup> (4) = 8.94; p=0.69  |
| <b>Ischaemic heart disease</b> | 20 (2.7)                 | 48 (3.5)   | 103 (2.9)  | 240 (3.4)   | 143 (3.5)               | 7 (1.0)                       | 9 (2.2)                  | 33 (3.7)   | 74 (3.0)   | 194 (3.5)   | 120 (3.7)               | 5 (0.9)                       | X <sup>2</sup> (4) = 4.99; p>0.99  | 11 (3.3)                 | 15 (3.0)  | 29 (2.7)   | 46 (2.9)   | 23 (2.8)                | 2 (1.3)                       | X <sup>2</sup> (4) = 0.43; p>0.99  |
| <b>COPD **</b>                 | 6 (0.8)                  | 35 (2.5)   | 83 (2.3)   | 208 (2.9)   | 139 (3.4)               | 5 (0.7)                       | 3 (0.7)                  | 22 (2.5)   | 59 (2.4)   | 159 (2.9)   | 95 (3.0)                | 4 (0.7)                       | X <sup>2</sup> (4) = 9.07; p=0.77  | 3 (0.9)                  | 13 (2.6)  | 24 (2.2)   | 49 (3.1)   | 44 (5.3)                | 1 (0.6)                       | X <sup>2</sup> (4) = 21.9; p=0.002 |

|                              |             |             |             |              |             |            |            |             |             |             |             |            |                                   |            |             |             |             |             |            |                                   |
|------------------------------|-------------|-------------|-------------|--------------|-------------|------------|------------|-------------|-------------|-------------|-------------|------------|-----------------------------------|------------|-------------|-------------|-------------|-------------|------------|-----------------------------------|
| <b>CKD</b>                   | 8<br>(1.1)  | 22<br>(1.6) | 46<br>(1.3) | 128<br>(1.8) | 74<br>(1.8) | 1<br>(0.1) | 4<br>(1.0) | 9<br>(1.0)  | 28<br>(1.1) | 81<br>(1.5) | 56<br>(1.7) | 1<br>(0.2) | X <sup>2</sup> (4) = 5.83; p>0.99 | 4<br>(1.2) | 13<br>(2.6) | 18<br>(1.7) | 47<br>(2.9) | 18<br>(2.2) | 0          | X <sup>2</sup> (4) = 6.76; p>0.99 |
| <b>PD</b>                    | 9<br>(1.2)  | 22<br>(1.6) | 51<br>(1.4) | 121<br>(1.7) | 60<br>(1.5) | 3<br>(0.4) | 5<br>(1.2) | 16<br>(1.8) | 33<br>(1.3) | 97<br>(1.8) | 48<br>(1.5) | 2<br>(0.4) | X <sup>2</sup> (4) = 3.13; p>0.99 | 4<br>(1.2) | 6<br>(1.2)  | 18<br>(1.7) | 24<br>(1.5) | 12<br>(1.4) | 1<br>(0.6) | ---                               |
| <b>Heart failure</b>         | 10<br>(1.3) | 12<br>(0.9) | 47<br>(1.3) | 92<br>(1.3)  | 58<br>(1.4) | 3<br>(0.4) | 7<br>(1.7) | 10<br>(1.1) | 39<br>(1.6) | 78<br>(1.4) | 52<br>(1.6) | 1<br>(0.2) | X <sup>2</sup> (4) = 1.54; p=0.82 | 3<br>(0.9) | 2<br>(0.4)  | 8<br>(0.7)  | 14<br>(0.9) | 6<br>(0.7)  | 2<br>(1.3) | ---                               |
| <b>Psoriasis</b>             | 11<br>(1.5) | 12<br>(0.9) | 33<br>(0.9) | 71<br>(1.0)  | 48<br>(1.2) | 4<br>(0.6) | 4<br>(1.0) | 6<br>(0.7)  | 24<br>(1.0) | 54<br>(1.0) | 37<br>(1.2) | 4<br>(0.7) | ---                               | 7<br>(2.1) | 6<br>(1.2)  | 9<br>(0.8)  | 17<br>(1.1) | 11<br>(1.3) | 0          | ---                               |
| <b>Atrial fibrillation</b>   | 10<br>(1.3) | 11<br>(0.8) | 27<br>(0.8) | 53<br>(0.7)  | 29<br>(0.7) | 3<br>(0.4) | 6<br>(1.5) | 7<br>(0.8)  | 21<br>(0.8) | 42<br>(0.8) | 23<br>(0.7) | 1<br>(0.2) | ---                               | 4<br>(1.2) | 4<br>(0.8)  | 6<br>(0.6)  | 11<br>(0.7) | 6<br>(0.7)  | 2<br>(1.3) | ---                               |
| <b>TIA</b>                   | 3<br>(0.3)  | 17<br>(1.0) | 27<br>(0.6) | 55<br>(0.6)  | 28<br>(0.5) | 0          | 1<br>(0.2) | 9<br>(1.0)  | 16<br>(0.6) | 43<br>(0.8) | 22<br>(0.7) | 0          | ---                               | 2<br>(0.6) | 8<br>(1.6)  | 11<br>(1.0) | 12<br>(0.8) | 6<br>(0.7)  | 0          | ---                               |
| <b>IBD</b>                   | 1<br>(0.1)  | 4<br>(0.3)  | 10<br>(0.3) | 12<br>(0.2)  | 13<br>(0.3) | 0          | 0          | 1<br>(0.1)  | 7<br>(0.3)  | 7<br>(0.1)  | 10<br>(0.3) | 0          | ---                               | 1<br>(0.3) | 3<br>(0.6)  | 3<br>(0.3)  | 5<br>(0.3)  | 3<br>(0.4)  | 0          | ---                               |
| <b>MS</b>                    | 4<br>(0.5)  | 2<br>(0.1)  | 7<br>(0.2)  | 14<br>(0.2)  | 4<br>(0.1)  | 1<br>(0.1) | 2<br>(0.5) | 2<br>(0.2)  | 2<br>(0.1)  | 9<br>(0.2)  | 3<br>(0.1)  | 1<br>(0.2) | ---                               | 2<br>(0.6) | 0           | 5<br>(0.5)  | 5<br>(0.3)  | 1<br>(0.1)  | 0          | ---                               |
| <b>Chronic liver disease</b> | 0           | 1<br>(0.1)  | 8<br>(0.2)  | 8<br>(0.1)   | 5<br>(0.1)  | 0          | 0          | 0           | 8<br>(0.3)  | 8<br>(0.1)  | 4<br>(0.1)  | 0          | ---                               | 0          | 1<br>(0.2)  | 0           | 0           | 1<br>(0.1)  | 0          | ---                               |
| <b>Chronic sinusitis</b>     | 0           | 0           | 1<br>(0.0)  | 2<br>(0.0)   | 3<br>(0.1)  | 0          | 0          | 0           | 1<br>(0.0)  | 2<br>(0.0)  | 3<br>(0.1)  | 0          | ---                               | 0          | 0           | 0           | 0           | 0           | 0          | ---                               |

\*, p<0.05; \*\*, p<0.01; \*\*\*, p<0.001; CVA, cerebrovascular accident; COPD, chronic obstructive lung disease; CKD, chronic kidney disease; PD, Parkinson's disease; TIA, transient ischemic attack; IBD, inflammatory bowel disease; MS, multiple sclerosis

1  
2  
3  
4  
5  
6  
7  
8  
9  
10  
11  
12  
13  
14  
15  
16  
17  
18  
19  
20  
21  
22  
23  
24  
25  
26  
27  
28  
29  
30  
31  
32  
33  
34  
35  
36  
37  
38  
39  
40  
41  
42  
43  
44  
45  
46  
47  
48  
49  
50  
51  
52  
53  
54  
55  
56  
57  
58  
59  
60

For peer review only

Supplemental Table 6. Sociodemographic features of cohort in HoNOS subsample analysis

|                                         | <b>Total<br/>n (%)</b> | <b>SSD<br/>n (%)</b> | <b>BD<br/>n (%)</b> |
|-----------------------------------------|------------------------|----------------------|---------------------|
| <b>Totals n (%)</b>                     | 13650 (100.0)          | 10384 (76.1)         | 3266 (23.9)         |
| <b>Sex***</b>                           |                        |                      |                     |
| Female                                  | 6537 (47.9)            | 4526 (69.2)          | 2011 (30.8)         |
| Male                                    | 7112 (52.1)            | 5858 (82.4)          | 1254 (17.6)         |
| <b>Age at first SMI diagnosis***</b>    |                        |                      |                     |
| 15 – 34                                 | 5821 (42.6)            | 4420 (42.6)          | 1401 (42.9)         |
| 35 – 44                                 | 3430 (25.1)            | 2183 (75.3)          | 716 (24.7)          |
| 45 – 54                                 | 2082 (15.3)            | 1594 (76.6)          | 488 (23.4)          |
| 55 – 64                                 | 1089 (8.0)             | 811 (74.5)           | 278 (25.5)          |
| 65+                                     | 1759 (12.9)            | 1376 (13.3)          | 383 (11.7)          |
| <b>Ethnicity***</b>                     |                        |                      |                     |
| White British                           | 4571 (33.5)            | 2961 (64.8)          | 1610 (35.2)         |
| Black Caribbean                         | 2849 (20.9)            | 2515 (88.3)          | 334 (11.7)          |
| Black African                           | 1852 (13.6)            | 1679 (90.7)          | 173 (9.3)           |
| South Asian                             | 436 (3.2)              | 338 (77.5)           | 98 (22.5)           |
| Irish                                   | 286 (2.1)              | 197 (68.9)           | 89 (31.1)           |
| Other <sup>§</sup>                      | 3127 (22.9)            | 2327 (74.4)          | 800 (25.6)          |
| Not stated <sup>§</sup>                 | 529 (3.9)              | 367 (3.5)            | 162 (5.0)           |
| <b>Index of multiple deprivation***</b> |                        |                      |                     |
| 1 (least deprivation)                   | 380 (2.8)              | 237 (62.4)           | 143 (37.6)          |
| 2                                       | 883 (6.5)              | 581 (65.8)           | 302 (34.2)          |
| 3                                       | 2786 (20.4)            | 1994 (71.6)          | 792 (28.4)          |
| 4                                       | 5947 (43.6)            | 4654 (78.3)          | 1293 (21.7)         |
| 5 (most deprivation)                    | 3308 (24.2)            | 2650 (80.1)          | 658 (19.9)          |
| Unknown <sup>§</sup>                    | 346 (2.5)              | 268 (77.5)           | 78 (22.5)           |
| <b>Physical conditions***</b>           |                        |                      |                     |
| No mentions                             | 7232 (53.0)            | 5320 (73.6)          | 1912 (26.4)         |
| One                                     | 3295 (24.1)            | 2596 (78.8)          | 699 (21.2)          |
| Two                                     | 1669 (12.2)            | 1340 (80.3)          | 329 (19.7)          |
| Three or more                           | 1454 (10.7)            | 1128 (77.6)          | 326 (22.4)          |

Note: \*\*\*  $p < .001$  for comparisons between BD and SSD groups. <sup>§</sup>Not included in analyses.



Supplemental Table 7. Associations between comorbidities and HoNOS scores in SSD.

| Comorbidity                     | HoNOS Score  | Unadjusted                  | M1                          | M2a                         |
|---------------------------------|--------------|-----------------------------|-----------------------------|-----------------------------|
|                                 | Mean (SD)    | B (95% CI)                  | B (95% CI)                  | B (95% CI)                  |
| <b>Whole cohort</b>             | 10.75 (6.10) |                             |                             |                             |
| <b>Diabetes</b>                 | 11.04 (6.10) | 0.360<br>(0.067 – 0.654)**  | 0.224<br>(-0.073 – 0.522)   | 0.300<br>(-0.002 – 0.602)   |
| Ref: No diabetes                | 10.68 (6.10) |                             |                             |                             |
| <b>Hypertension</b>             | 11.17 (6.05) | 0.519<br>(0.220 – 0.818)*** | 0.264<br>(-0.048 – 0.575)   | 0.324<br>(0.006 – 0.641)*   |
| Ref: No hypertension            | 10.65 (6.11) |                             |                             |                             |
| <b>Asthma</b>                   | 11.19 (6.11) | 0.492<br>(0.126 – 0.859)**  | 0.551<br>(0.185 – 0.918)**  | 0.530<br>(0.158 – 0.903)**  |
| Ref: No asthma                  | 10.70 (6.10) |                             |                             |                             |
| <b>Arthritis</b>                | 12.08 (6.21) | 1.422<br>(0.948 – 1.895)*** | 1.259<br>(0.775 – 1.742)*** | 1.274<br>(0.788 – 1.759)*** |
| Ref: No arthritis               | 10.66 (6.08) |                             |                             |                             |
| <b>Epilepsy</b>                 | 11.53 (6.24) | 0.827<br>(0.316 – 1.337)*** | 0.850<br>(0.341 – 1.358)*** | 0.856<br>(0.341 – 1.370)*** |
| Ref: No epilepsy                | 10.71 (6.09) |                             |                             |                             |
| <b>CVA</b>                      | 11.87 (6.23) | 1.178<br>(0.651 – 1.705)*** | 0.913<br>(0.383 – 1.443)*** | 0.921<br>(0.388 – 1.454)**  |
| Ref: No CVA                     | 10.69 (6.09) |                             |                             |                             |
| <b>Eczema</b>                   | 11.48 (6.25) | 0.763<br>(0.188 – 1.338)**  | 0.846<br>(0.273 – 1.420)**  | 0.754<br>(0.172 – 1.336)*   |
| Ref: No eczema                  | 10.72 (6.09) |                             |                             |                             |
| <b>Migraine</b>                 | 10.71 (5.87) | -0.041<br>(-0.683 – 0.602)  | 0.196<br>(-0.447 – 0.839)   | 0.192<br>(-0.458 – 0.842)   |
| Ref: No migraine                | 10.75 (6.11) |                             |                             |                             |
| <b>Ischaemic heart disease</b>  | 11.59 (5.91) | 0.874<br>(0.274 – 1.474)**  | 0.520<br>(-0.083 – 1.124)   | 0.477<br>(-0.132 – 1.085)   |
| Ref: No ischaemic heart disease | 10.72 (6.11) |                             |                             |                             |
| <b>COPD</b>                     | 12.15 (5.70) | 1.444<br>(0.760 – 2.128)*** | 1.045<br>(0.354 – 1.736)**  | 1.043<br>(0.343 – 1.742)**  |
| Ref: No COPD                    | 10.71 (6.11) |                             |                             |                             |
| <b>Number of comorbidities</b>  |              | 0.387<br>(0.294 – 0.481)*** | 0.328<br>(0.231 – 0.425)*** | 0.342<br>(0.243 – 0.441)*** |
| <b>1 or more comorbidities</b>  | 11.13 (6.11) | 0.745<br>(0.511 – 0.980)*** | 0.607<br>(0.367 – 0.847)*** | 0.657<br>(0.410 – 0.903)*** |
| Ref: No comorbidities           | 10.39 (6.07) |                             |                             |                             |
| <b>2 or more comorbidities</b>  | 11.45 (6.16) | 0.921<br>(0.646 – 1.196)*** | 0.747<br>(0.464 – 1.030)*** | 0.771<br>(0.484 – 1.059)*** |
| Ref: Less than 1 comorbidities  | 10.53 (6.07) |                             |                             |                             |

*Supplemental Table 8. Associations between comorbidities and HoNOS scores in BD.*

| Comorbidity                     | HoNOS Score   | Unadjusted                  | M1                          | M2a                         |
|---------------------------------|---------------|-----------------------------|-----------------------------|-----------------------------|
|                                 | Mean (SD)     | B (95% CI)                  | B (95% CI)                  | B (95% CI)                  |
| <b>Whole cohort</b>             | 9.28 (5.77)   |                             |                             |                             |
| <b>Diabetes</b>                 | 10.941 (5.97) | 1.304<br>(0.720 – 1.887)*** | 0.968<br>(0.370 – 1.565)**  | 0.961<br>(0.355 – 1.568)**  |
| Ref: No diabetes                | 9.11 (5.72)   |                             |                             |                             |
| <b>Hypertension</b>             | 10.13 (5.82)  | 0.972<br>(0.384 – 1.561)**  | 0.446<br>(-0.182 – 1.074)   | 0.277<br>(-0.359 – 0.912)   |
| Ref: No hypertension            | 9.15 (5.76)   |                             |                             |                             |
| <b>Asthma</b>                   | 10.61 (6.27)  | 1.512<br>(0.900 – 2.124)*** | 1.597<br>(0.985 – 2.210)*** | 1.503<br>(0.887 – 2.120)*** |
| Ref: No asthma                  | 9.10 (5.68)   |                             |                             |                             |
| <b>Arthritis</b>                | 11.81 (6.13)  | 2.725<br>(1.960 – 3.490)*** | 2.487<br>(1.702 – 3.273)*** | 2.396<br>(1.606 – 3.186)*** |
| Ref: No arthritis               | 9.09 (5.70)   |                             |                             |                             |
| <b>Epilepsy</b>                 | 10.77 (5.96)  | 1.552<br>(0.513 – 2.591)**  | 1.587<br>(0.551 – 2.624)**  | 1.496<br>(0.466 – 2.527)**  |
| Ref: No epilepsy                | 9.22 (5.76)   |                             |                             |                             |
| <b>CVA</b>                      | 11.60 (6.16)  | 2.425<br>(1.464 – 3.386)*** | 2.098<br>(1.124 – 3.071)*** | 2.030<br>(1.064 – 2.996)*** |
| Ref: No CVA                     | 9.17 (5.73)   |                             |                             |                             |
| <b>Eczema</b>                   | 9.83 (5.82)   | 0.578<br>(-0.446 – 1.603)   | 0.622<br>(-0.400 – 1.644)   | 0.427<br>(-0.603 – 1.458)   |
| Ref: No eczema                  | 9.26 (5.77)   |                             |                             |                             |
| <b>Migraine</b>                 | 9.55 (5.34)   | 0.284<br>(-0.586 – 1.154)   | 0.523<br>(-0.350 – 1.397)   | 0.527<br>(-0.346 – 1.400)   |
| Ref: No migraine                | 9.26 (5.80)   |                             |                             |                             |
| <b>Ischaemic heart disease</b>  | 11.84 (5.95)  | 2.649<br>(1.560 – 3.738)*** | 2.093<br>(0.987 – 3.200)*** | 2.204<br>(1.098 – 3.309)**  |
| Ref: No ischaemic heart disease | 9.19 (5.75)   |                             |                             |                             |
| <b>COPD</b>                     | 11.89 (5.99)  | 2.711<br>(1.679 – 3.743)*** | 2.298<br>(1.248 – 3.348)*** | 2.128<br>(1.077 – 3.179)*** |
| Ref: No COPD                    | 9.18 (5.74)   |                             |                             |                             |
| <b>Number of comorbidities</b>  |               | 0.723<br>(0.566 – 0.879)*** | 0.661<br>(0.494 – 0.828)*** | 0.642<br>(0.473 – 0.811)*** |
| <b>1 or more comorbidities</b>  | 10.30 (5.91)  | 1.740<br>(1.343 – 2.138)*** | 1.559<br>(1.143 – 1.974)*** | 1.457<br>(1.031 – 1.883)*** |
| Ref: No comorbidities           | 8.56 (5.57)   |                             |                             |                             |
| <b>2 or more comorbidities</b>  | 10.89 (5.99)  | 2.013<br>(1.524 – 2.503)*** | 1.797<br>(1.280 – 2.314)*** | 1.789<br>(1.267 – 2.311)*** |
| Ref: Less than 1 comorbidities  | 8.88 (5.64)   |                             |                             |                             |

Supplemental Figure 1. Distribution of all conditions in the SMI cohort by SMI diagnoses

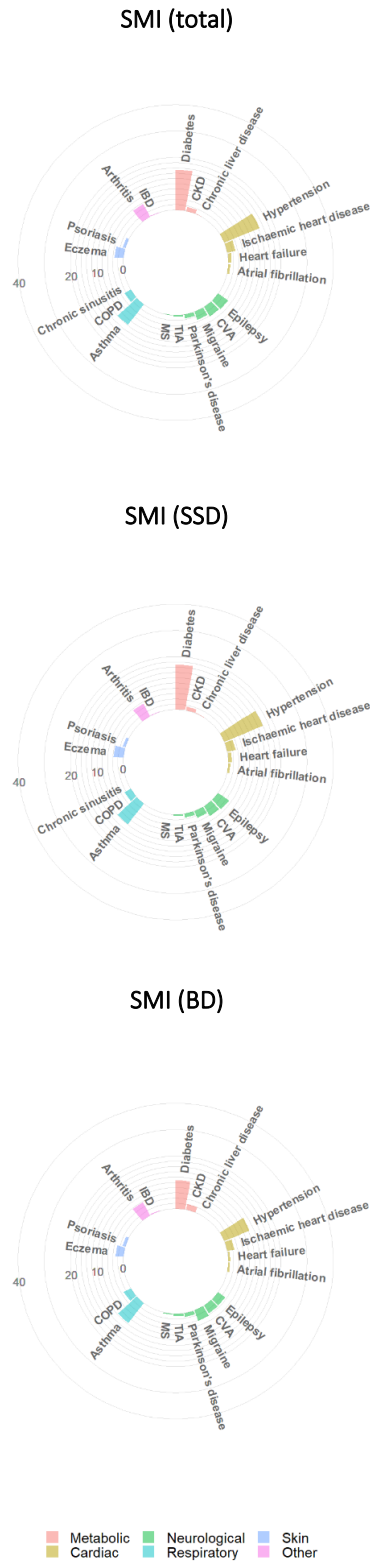

Supplemental Figure 2. Prevalence rates for age at SMI diagnoses per condition and comparison between individuals with BD and SSD.

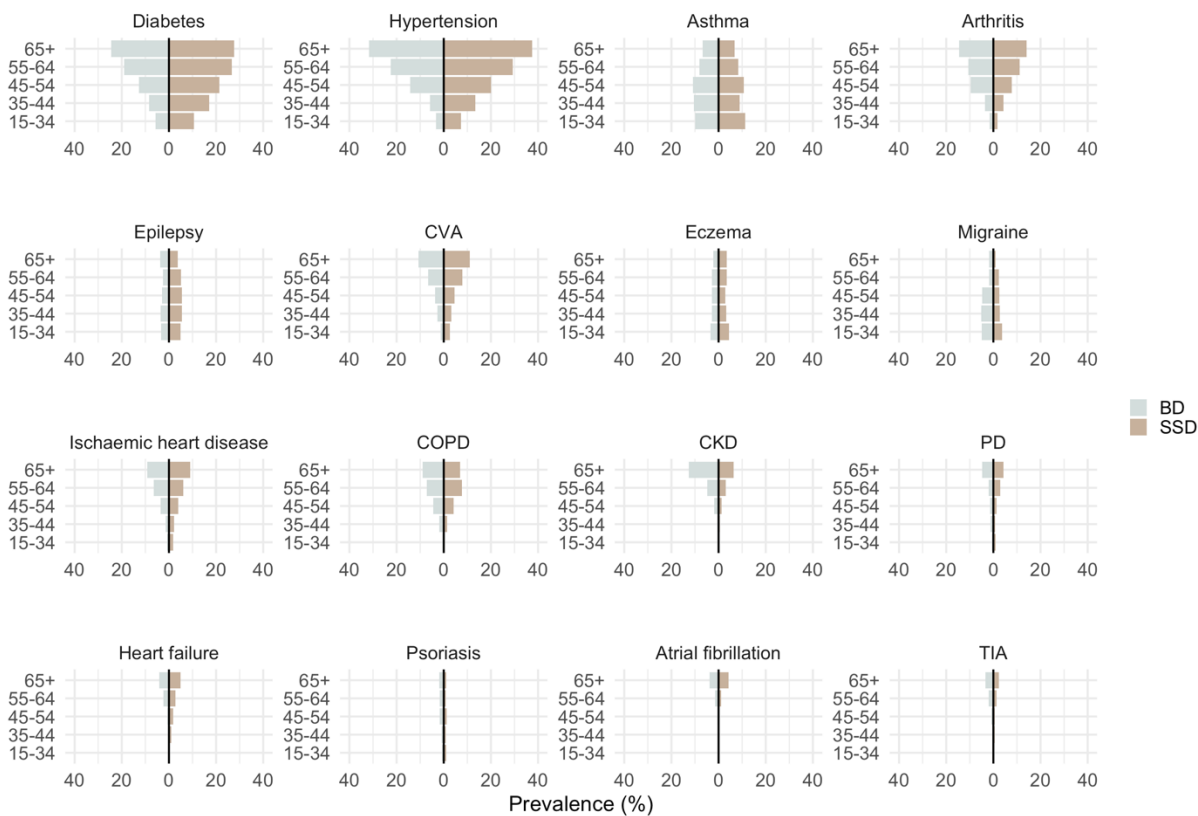

**Appendix 1. SNOMED Container and Concept Level Groupings for physical health conditions included in this study.**

| Container Concept                                                | Concepts                                                                                                                                                                                                                                                                                                                                |
|------------------------------------------------------------------|-----------------------------------------------------------------------------------------------------------------------------------------------------------------------------------------------------------------------------------------------------------------------------------------------------------------------------------------|
| S-73211009 - Diabetes mellitus (disorder)                        | S-44054006 - Diabetes mellitus type 2 (disorder)<br>S-46635009 - Diabetes mellitus type 1 (disorder)<br>S-422088007 - Disorder of nervous system co-occurrent and due to diabetes mellitus (disorder)<br>S-25093002 - Disorder of eye co-occurrent and due to diabetes mellitus (disorder)<br>S-73211009 - Diabetes mellitus (disorder) |
| S-84114007 - Heart failure (disorder)                            | S-128404006 - Right heart failure (disorder)<br>S-48447003 - Chronic heart failure (disorder)<br>S-56675007 - Acute heart failure (disorder)<br>S-85232009 - Left heart failure (disorder)<br>S-42343007 - Congestive heart failure (disorder)<br>S-84114007 - Heart failure (disorder)                                                 |
| S-414545008 - Ischemic heart disease (disorder)                  | S-413439005 - Acute ischemic heart disease (disorder)<br>S-413838009 - Chronic ischemic heart disease (disorder)<br>S-194828000 - Angina (disorder)<br>S-22298006 - Myocardial infarction (disorder)<br>S-414545008 - Ischemic heart disease (disorder)                                                                                 |
| S-38341003 - Hypertensive disorder, systemic arterial (disorder) | S-31992008 - Secondary hypertension (disorder)<br>S-48146000 - Diastolic hypertension (disorder)<br>S-56218007 - Systolic hypertension (disorder)<br>S-59621000 - Essential hypertension (disorder)<br>S-38341003 - Hypertensive disorder, systemic arterial (disorder)                                                                 |
| S-13645005 - Chronic obstructive lung disease (disorder)         | S-195951007 - Acute exacerbation of chronic obstructive airways disease (disorder)<br>S-87433001 - Pulmonary emphysema (disorder)<br>S-13645005 - Chronic obstructive lung disease (disorder)                                                                                                                                           |
| S-195967001 - Asthma (disorder)                                  | S-195967001 - Asthma (disorder)                                                                                                                                                                                                                                                                                                         |
| S-709044004 - Chronic kidney disease (disorder)                  | S-723190009 - Chronic renal insufficiency (disorder)<br>S-709044004 - Chronic kidney disease (disorder)                                                                                                                                                                                                                                 |

|                                                    |                                                                                                                                                                                                                                                                                                                                                                                                       |
|----------------------------------------------------|-------------------------------------------------------------------------------------------------------------------------------------------------------------------------------------------------------------------------------------------------------------------------------------------------------------------------------------------------------------------------------------------------------|
| S-230690007 - Cerebrovascular accident (disorder)  | S-25133001 - Completed stroke (disorder)<br>S-371040005 - Thrombotic stroke (disorder)<br>S-371041009 - Embolic stroke (disorder)<br>S-413102000 - Infarction of basal ganglia (disorder)<br>S-422504002 - Ischemic stroke (disorder)<br>S-723082006 - Silent cerebral infarct (disorder)<br>S-1078001000000105 - Haemorrhagic stroke (disorder)<br>S-230690007 - Cerebrovascular accident (disorder) |
| S-266257000 - Transient ischemic attack (disorder) | S-266257000 - Transient ischemic attack (disorder)                                                                                                                                                                                                                                                                                                                                                    |
| S-49049000 - Parkinson's disease (disorder)        | S-49049000 - Parkinson's disease (disorder)                                                                                                                                                                                                                                                                                                                                                           |
| S-24700007 - Multiple sclerosis (disorder)         | S-24700007 - Multiple sclerosis (disorder)                                                                                                                                                                                                                                                                                                                                                            |
| S-84757009 - Epilepsy (disorder)                   | S-352818000 - Tonic-clonic epilepsy (disorder)<br>S-19598007 - Generalized epilepsy (disorder)<br>S-230456007 - Status epilepticus (disorder)<br>S-509341000000107 - Petit-mal epilepsy (disorder)<br>S-84757009 - Epilepsy (disorder)                                                                                                                                                                |
| S-37796009 - Migraine (disorder)                   | S-37796009 - Migraine (disorder)<br>S-4473006 - Migraine with aura (disorder)<br>S-56097005 - Migraine without aura (disorder)                                                                                                                                                                                                                                                                        |
| S-53741008 - Coronary arteriosclerosis (disorder)  | S-810681000000101 - Coronary microvascular disease (disorder)<br>S-53741008 - Coronary arteriosclerosis (disorder)                                                                                                                                                                                                                                                                                    |
| S-49436004 - Atrial fibrillation (disorder)        | S-49436004 - Atrial fibrillation (disorder)                                                                                                                                                                                                                                                                                                                                                           |
| S-40055000 - Chronic sinusitis (disorder)          | S-40055000 - Chronic sinusitis (disorder)                                                                                                                                                                                                                                                                                                                                                             |
| S-24526004 - Inflammatory bowel disease (disorder) | S-24526004 - Inflammatory bowel disease (disorder)<br>S-397173003 - Crohn's disease of intestine (disorder)<br>S-64766004 - Ulcerative colitis (disorder)                                                                                                                                                                                                                                             |
| S-328383001 - Chronic liver disease (disorder)     | S-328383001 - Chronic liver disease (disorder)<br>S-76783007 - Chronic hepatitis (disorder)<br>S-79720007 - Chronic nonalcoholic liver disease (disorder)                                                                                                                                                                                                                                             |

|                                  |                                                                                                                                                                                                                             |
|----------------------------------|-----------------------------------------------------------------------------------------------------------------------------------------------------------------------------------------------------------------------------|
|                                  | S-713181003 - Chronic alcoholic liver disease (disorder)                                                                                                                                                                    |
| S-9014002 - Psoriasis (disorder) | S-9014002 - Psoriasis (disorder)                                                                                                                                                                                            |
| S-43116000 - Eczema (disorder)   | S-43116000 - Eczema (disorder)                                                                                                                                                                                              |
| S-3723001 - Arthritis (disorder) | S-69896004 - Rheumatoid arthritis (disorder)<br>S-399112009 - Seronegative arthritis (disorder)<br>S-35908007 - Chronic arthritis (disorder)<br>S-11939005 - Acute arthritis (disorder)<br>S-3723001 - Arthritis (disorder) |

## STROBE Statement—checklist of items that should be included in reports of observational studies

|                              | Item No | Recommendation                                                                                                                                                                                                                                                                                                                                                                                                                                                         | Page No |
|------------------------------|---------|------------------------------------------------------------------------------------------------------------------------------------------------------------------------------------------------------------------------------------------------------------------------------------------------------------------------------------------------------------------------------------------------------------------------------------------------------------------------|---------|
| <b>Title and abstract</b>    | 1       | (a) Indicate the study's design with a commonly used term in the title or the abstract                                                                                                                                                                                                                                                                                                                                                                                 | 1       |
|                              |         | (b) Provide in the abstract an informative and balanced summary of what was done and what was found                                                                                                                                                                                                                                                                                                                                                                    | 2       |
| <b>Introduction</b>          |         |                                                                                                                                                                                                                                                                                                                                                                                                                                                                        |         |
| Background/rationale         | 2       | Explain the scientific background and rationale for the investigation being reported                                                                                                                                                                                                                                                                                                                                                                                   | 4,5     |
| Objectives                   | 3       | State specific objectives, including any prespecified hypotheses                                                                                                                                                                                                                                                                                                                                                                                                       | 5       |
| <b>Methods</b>               |         |                                                                                                                                                                                                                                                                                                                                                                                                                                                                        |         |
| Study design                 | 4       | Present key elements of study design early in the paper                                                                                                                                                                                                                                                                                                                                                                                                                | 5,6     |
| Setting                      | 5       | Describe the setting, locations, and relevant dates, including periods of recruitment, exposure, follow-up, and data collection                                                                                                                                                                                                                                                                                                                                        | 5,6     |
| Participants                 | 6       | (a) <i>Cohort study</i> —Give the eligibility criteria, and the sources and methods of selection of participants. Describe methods of follow-up<br><i>Case-control study</i> —Give the eligibility criteria, and the sources and methods of case ascertainment and control selection. Give the rationale for the choice of cases and controls<br><i>Cross-sectional study</i> —Give the eligibility criteria, and the sources and methods of selection of participants | 5       |
|                              |         | (b) <i>Cohort study</i> —For matched studies, give matching criteria and number of exposed and unexposed<br><i>Case-control study</i> —For matched studies, give matching criteria and the number of controls per case                                                                                                                                                                                                                                                 |         |
| Variables                    | 7       | Clearly define all outcomes, exposures, predictors, potential confounders, and effect modifiers. Give diagnostic criteria, if applicable                                                                                                                                                                                                                                                                                                                               | 6-8     |
| Data sources/<br>measurement | 8*      | For each variable of interest, give sources of data and details of methods of assessment (measurement). Describe comparability of assessment methods if there is more than one group                                                                                                                                                                                                                                                                                   | 6-8     |
| Bias                         | 9       | Describe any efforts to address potential sources of bias                                                                                                                                                                                                                                                                                                                                                                                                              | 6-9     |
| Study size                   | 10      | Explain how the study size was arrived at                                                                                                                                                                                                                                                                                                                                                                                                                              | 5,6     |
| Quantitative variables       | 11      | Explain how quantitative variables were handled in the analyses. If applicable, describe which groupings were chosen and why                                                                                                                                                                                                                                                                                                                                           | 6-8     |
| Statistical methods          | 12      | (a) Describe all statistical methods, including those used to control for confounding                                                                                                                                                                                                                                                                                                                                                                                  | 8,9     |
|                              |         | (b) Describe any methods used to examine subgroups and interactions                                                                                                                                                                                                                                                                                                                                                                                                    | 8,9     |
|                              |         | (c) Explain how missing data were addressed                                                                                                                                                                                                                                                                                                                                                                                                                            | 8,9     |
|                              |         | (d) <i>Cohort study</i> —If applicable, explain how loss to follow-up was addressed<br><i>Case-control study</i> —If applicable, explain how matching of cases and controls was addressed<br><i>Cross-sectional study</i> —If applicable, describe analytical methods taking account of sampling strategy                                                                                                                                                              | 8,9     |
|                              |         | (e) Describe any sensitivity analyses                                                                                                                                                                                                                                                                                                                                                                                                                                  | 8,9     |

Continued on next page



1  
2  
3  
4  
5  
6  
7  
8  
9  
10  
11  
12  
13  
14  
15  
16  
17  
18  
19  
20  
21  
22  
23  
24  
25  
26  
27  
28  
29  
30  
31  
32  
33  
34  
35  
36  
37  
38  
39  
40  
41  
42  
43  
44  
45  
46  
47  
48  
49  
50  
51  
52  
53  
54  
55  
56  
57  
58  
59  
60

| <b>Results</b>           |     |                                                                                                                                                                                                                                                                                                                                                                                                               |       |
|--------------------------|-----|---------------------------------------------------------------------------------------------------------------------------------------------------------------------------------------------------------------------------------------------------------------------------------------------------------------------------------------------------------------------------------------------------------------|-------|
| Participants             | 13* | (a) Report numbers of individuals at each stage of study—eg numbers potentially eligible, examined for eligibility, confirmed eligible, included in the study, completing follow-up, and analysed<br>(b) Give reasons for non-participation at each stage<br>(c) Consider use of a flow diagram                                                                                                               | 10    |
| Descriptive data         | 14* | (a) Give characteristics of study participants (eg demographic, clinical, social) and information on exposures and potential confounders<br>(b) Indicate number of participants with missing data for each variable of interest<br>(c) <i>Cohort study</i> —Summarise follow-up time (eg, average and total amount)                                                                                           | 10    |
| Outcome data             | 15* | <i>Cohort study</i> —Report numbers of outcome events or summary measures over time<br><i>Case-control study</i> —Report numbers in each exposure category, or summary measures of exposure<br><i>Cross-sectional study</i> —Report numbers of outcome events or summary measures                                                                                                                             | 9-13  |
| Main results             | 16  | (a) Give unadjusted estimates and, if applicable, confounder-adjusted estimates and their precision (eg, 95% confidence interval). Make clear which confounders were adjusted for and why they were included<br>(b) Report category boundaries when continuous variables were categorized<br>(c) If relevant, consider translating estimates of relative risk into absolute risk for a meaningful time period | 9-13  |
| Other analyses           | 17  | Report other analyses done—eg analyses of subgroups and interactions, and sensitivity analyses                                                                                                                                                                                                                                                                                                                | Supp  |
| <b>Discussion</b>        |     |                                                                                                                                                                                                                                                                                                                                                                                                               |       |
| Key results              | 18  | Summarise key results with reference to study objectives                                                                                                                                                                                                                                                                                                                                                      | 13,14 |
| Limitations              | 19  | Discuss limitations of the study, taking into account sources of potential bias or imprecision. Discuss both direction and magnitude of any potential bias                                                                                                                                                                                                                                                    | 16    |
| Interpretation           | 20  | Give a cautious overall interpretation of results considering objectives, limitations, multiplicity of analyses, results from similar studies, and other relevant evidence                                                                                                                                                                                                                                    | 13-17 |
| Generalisability         | 21  | Discuss the generalisability (external validity) of the study results                                                                                                                                                                                                                                                                                                                                         | 16,17 |
| <b>Other information</b> |     |                                                                                                                                                                                                                                                                                                                                                                                                               |       |
| Funding                  | 22  | Give the source of funding and the role of the funders for the present study and, if applicable, for the original study on which the present article is based                                                                                                                                                                                                                                                 | 18    |

\*Give information separately for cases and controls in case-control studies and, if applicable, for exposed and unexposed groups in cohort and cross-sectional studies.

**Note:** An Explanation and Elaboration article discusses each checklist item and gives methodological background and published examples of transparent reporting. The STROBE checklist is best used in conjunction with this article (freely available on the Web sites of PLoS Medicine at <http://www.plosmedicine.org/>, Annals of Internal Medicine at <http://www.annals.org/>, and Epidemiology at <http://www.epidem.com/>). Information on the STROBE Initiative is available at [www.strobe-statement.org](http://www.strobe-statement.org).

# BMJ Open

## Mapping Multimorbidity in Individuals with Schizophrenia and Bipolar Disorders: Evidence from the South London and Maudsley NHS Foundation Trust Biomedical Research Centre (SLAM BRC) Case Register

|                               |                                                                                                                                                                                                                                                                                                                                                                                                                                                                                                                                                                                                                                                                                                                                                                                                                                                                                                                                                                                                                                                                                                                                                                                                                                                                                                                                                                                                                                                                                                                                                                                                                                                                                                                                                                                                                                                                                                                                                                                                                                                                                                                                                                                                                                                                                                                                                                     |
|-------------------------------|---------------------------------------------------------------------------------------------------------------------------------------------------------------------------------------------------------------------------------------------------------------------------------------------------------------------------------------------------------------------------------------------------------------------------------------------------------------------------------------------------------------------------------------------------------------------------------------------------------------------------------------------------------------------------------------------------------------------------------------------------------------------------------------------------------------------------------------------------------------------------------------------------------------------------------------------------------------------------------------------------------------------------------------------------------------------------------------------------------------------------------------------------------------------------------------------------------------------------------------------------------------------------------------------------------------------------------------------------------------------------------------------------------------------------------------------------------------------------------------------------------------------------------------------------------------------------------------------------------------------------------------------------------------------------------------------------------------------------------------------------------------------------------------------------------------------------------------------------------------------------------------------------------------------------------------------------------------------------------------------------------------------------------------------------------------------------------------------------------------------------------------------------------------------------------------------------------------------------------------------------------------------------------------------------------------------------------------------------------------------|
| Journal:                      | <i>BMJ Open</i>                                                                                                                                                                                                                                                                                                                                                                                                                                                                                                                                                                                                                                                                                                                                                                                                                                                                                                                                                                                                                                                                                                                                                                                                                                                                                                                                                                                                                                                                                                                                                                                                                                                                                                                                                                                                                                                                                                                                                                                                                                                                                                                                                                                                                                                                                                                                                     |
| Manuscript ID                 | bmjopen-2021-054414.R2                                                                                                                                                                                                                                                                                                                                                                                                                                                                                                                                                                                                                                                                                                                                                                                                                                                                                                                                                                                                                                                                                                                                                                                                                                                                                                                                                                                                                                                                                                                                                                                                                                                                                                                                                                                                                                                                                                                                                                                                                                                                                                                                                                                                                                                                                                                                              |
| Article Type:                 | Original research                                                                                                                                                                                                                                                                                                                                                                                                                                                                                                                                                                                                                                                                                                                                                                                                                                                                                                                                                                                                                                                                                                                                                                                                                                                                                                                                                                                                                                                                                                                                                                                                                                                                                                                                                                                                                                                                                                                                                                                                                                                                                                                                                                                                                                                                                                                                                   |
| Date Submitted by the Author: | 26-Nov-2021                                                                                                                                                                                                                                                                                                                                                                                                                                                                                                                                                                                                                                                                                                                                                                                                                                                                                                                                                                                                                                                                                                                                                                                                                                                                                                                                                                                                                                                                                                                                                                                                                                                                                                                                                                                                                                                                                                                                                                                                                                                                                                                                                                                                                                                                                                                                                         |
| Complete List of Authors:     | <p>Bendayan, Rebecca; King's College London, Biostatistics and Health Informatics, Institute of Psychiatry, Psychology and Neurosciences; King's College London, NIHR Biomedical Research Centre at South London and Maudsley NHS Foundation Trust, London, United Kingdom</p> <p>Kraljevic, Zeljko; King's College London, Biostatistics and Health Informatics, Institute of Psychiatry, Psychology and Neuroscience</p> <p>Shaari, Shaweena; King's College London, NIHR Biomedical Research Centre at South London and Maudsley NHS Foundation Trust, London, United Kingdom</p> <p>Das-Munshi, Jayati; King's College London Institute of Psychiatry Psychology and Neuroscience, Psychological Medicine</p> <p>Leipold, Leona; King's College London, NIHR Biomedical Research Centre at South London and Maudsley NHS Foundation Trust, London, United Kingdom</p> <p>Chaturvedi, Jaya; King's College London, Biostatistics and Health Informatics, Institute of Psychiatry, Psychology and Neuroscience</p> <p>Mirza, Luwaiza; King's College London, NIHR Biomedical Research Centre at South London and Maudsley NHS Foundation Trust, London, United Kingdom</p> <p>Aldelemi, Sarah; King's College London, NIHR Biomedical Research Centre at South London and Maudsley NHS Foundation Trust, London, United Kingdom</p> <p>Searle, Thomas; King's College London, Department of Biostatistics and Health Informatics</p> <p>Chance, Natalia; King's College London, NIHR Biomedical Research Centre at South London and Maudsley NHS Foundation Trust and King's College London, London, United Kingdom</p> <p>Mascio, Aurelie; King's College London, Biostatistics and Health Informatics, Institute of Psychiatry, Psychology and Neuroscience</p> <p>Skiada, Naoko; King's College London, Biostatistics and Health Informatics, Institute of Psychiatry, Psychology and Neuroscience</p> <p>Wang, Tao; Department of Biostatistics and Health Informatics, Institute of Psychiatry, Psychology and Neuroscience, King's College London, London, United Kingdom</p> <p>Roberts, Angus; King's College London, Biostatistics and Health Informatics, Institute of Psychiatry, Psychology and Neuroscience; NIHR Biomedical Research Centre at South London and Maudsley NHS Foundation Trust and King's College London, London, United Kingdom</p> |

|                                  |                                                                                                                                                                                                                                                                                                                             |
|----------------------------------|-----------------------------------------------------------------------------------------------------------------------------------------------------------------------------------------------------------------------------------------------------------------------------------------------------------------------------|
|                                  | Stewart, Robert; King's College London, Psychological Medicine; NIHR Biomedical Research Centre at South London and Maudsley NHS Foundation Trust and King's College London, London, United Kingdom<br>Bean, Daniel; King's College London, Biostatistics and Health Informatics<br>Dobson, Richard; King's College London, |
| <b>Primary Subject Heading</b> : | Mental health                                                                                                                                                                                                                                                                                                               |
| Secondary Subject Heading:       | Public health, Epidemiology, Health informatics                                                                                                                                                                                                                                                                             |
| Keywords:                        | Health informatics < BIOTECHNOLOGY & BIOINFORMATICS, EPIDEMIOLOGY, MENTAL HEALTH, PSYCHIATRY, PUBLIC HEALTH                                                                                                                                                                                                                 |
|                                  |                                                                                                                                                                                                                                                                                                                             |

SCHOLARONE™  
Manuscripts



I, the Submitting Author has the right to grant and does grant on behalf of all authors of the Work (as defined in the below author licence), an exclusive licence and/or a non-exclusive licence for contributions from authors who are: i) UK Crown employees; ii) where BMJ has agreed a CC-BY licence shall apply, and/or iii) in accordance with the terms applicable for US Federal Government officers or employees acting as part of their official duties; on a worldwide, perpetual, irrevocable, royalty-free basis to BMJ Publishing Group Ltd ("BMJ") its licensees and where the relevant Journal is co-owned by BMJ to the co-owners of the Journal, to publish the Work in this journal and any other BMJ products and to exploit all rights, as set out in our [licence](#).

The Submitting Author accepts and understands that any supply made under these terms is made by BMJ to the Submitting Author unless you are acting as an employee on behalf of your employer or a postgraduate student of an affiliated institution which is paying any applicable article publishing charge ("APC") for Open Access articles. Where the Submitting Author wishes to make the Work available on an Open Access basis (and intends to pay the relevant APC), the terms of reuse of such Open Access shall be governed by a Creative Commons licence – details of these licences and which [Creative Commons](#) licence will apply to this Work are set out in our licence referred to above.

Other than as permitted in any relevant BMJ Author's Self Archiving Policies, I confirm this Work has not been accepted for publication elsewhere, is not being considered for publication elsewhere and does not duplicate material already published. I confirm all authors consent to publication of this Work and authorise the granting of this licence.

1  
2  
3 **Mapping Multimorbidity in Individuals with Schizophrenia and Bipolar Disorders:**  
4  
5 **Evidence from the South London and Maudsley NHS Foundation Trust Biomedical**  
6  
7 **Research Centre (SLAM BRC) Case Register**  
8

9  
10 Rebecca Bendayan<sup>1,2</sup>, Zeljko Kraljevic<sup>2</sup>, Shaweena Shaari<sup>1</sup>, Jayati Das-Munshi<sup>3</sup>, Leona Leipold<sup>1</sup>,  
11  
12 Jaya Chaturvedi<sup>2</sup>, Luwaiza Mirza<sup>1</sup>, Sarah Aldelemi<sup>1</sup>, Thomas Searle<sup>2</sup>, Natalia Chance<sup>1</sup>, Aurelie  
13  
14 Mascio<sup>2</sup>, Naoko Skiada<sup>2</sup>, Tao Wang<sup>2</sup>, Angus Roberts<sup>1,2</sup>, Robert Stewart<sup>1,3</sup>, Daniel Bean<sup>2,4</sup>, Richard  
15  
16 Dobson<sup>1,2,5</sup>  
17

18  
19  
20 <sup>1</sup>NIHR Biomedical Research Centre at South London and Maudsley NHS Foundation Trust,  
21 London, United Kingdom  
22

23  
24 <sup>2</sup>Department of Biostatistics and Health Informatics, Institute of Psychiatry, Psychology and  
25 Neuroscience, King's College London, London, United Kingdom  
26

27  
28 <sup>3</sup>Department of Psychological Medicine, Institute of Psychiatry, Psychology and Neuroscience,  
29 King's College London, London, United Kingdom  
30

31  
32 <sup>4</sup>Health Data Research UK London, University College London, London, United Kingdom  
33

34  
35 <sup>5</sup>Institute of Health Informatics, University College London, London, United Kingdom  
36

37  
38 **Word count: 3920**

39 **Correspondence:**

40 Rebecca Bendayan / ORCID: 0000-0003-1461-556X

41 E-mail: [rebecca.bendayan@kcl.ac.uk](mailto:rebecca.bendayan@kcl.ac.uk)

42 NIHR Maudsley Biomedical Research Centre

43 Department of Biostatistics & Health Informatics

44 SGDP Centre, IoPPN, Box PO 80

45 De Crespigny Park, Denmark Hill

46 London SE5 8AF, UNITED KINGDOM  
47  
48  
49  
50  
51  
52  
53  
54  
55  
56  
57  
58  
59  
60

## Abstract

**Objectives:** The first aim of this study was to design and develop a valid and replicable strategy to extract physical health conditions from clinical notes which are common in mental health services. Then, we examined the prevalence of these conditions in individuals with SMI and compared their individual and combined prevalence in individuals with bipolar (BD) and schizophrenia spectrum disorders (SSD).

**Design:** Observational study.

**Setting:** Secondary mental healthcare services from South London

**Participants:** Our maximal sample comprised 17,500 individuals aged 15 years or older who had received a primary or secondary SMI diagnosis (ICD-10, F20-31) between 2007 and 2018.

**Measures:** We designed and implemented a data extraction strategy for 21 common physical comorbidities using a natural language processing pipeline, MedCAT. Associations were investigated with sex, age at SMI diagnosis, ethnicity and social deprivation for the whole cohort and the BD and SSD subgroups. Linear regression models were used to examine associations with disability measured by the Health of Nations Outcome Scale (HoNOS).

**Results:** Physical health data was extracted, achieving precision rates (F1) above 0.90 for all conditions. The ten most prevalent conditions were diabetes, hypertension, asthma, arthritis, epilepsy, cerebrovascular accident, eczema, migraine, ischaemic heart disease and COPD. The most prevalent combination in this population included diabetes, hypertension and asthma, regardless of their SMI diagnoses.

**Conclusions:** Our data extraction strategy was found to be adequate to extract physical health data from clinical notes, which is essential for future multimorbidity research using text records. We found that around 40% of our cohort had multimorbidity from which 20% had complex

1  
2  
3 multimorbidity (two or more physical conditions besides SMI). Sex, age, ethnicity and social  
4  
5 deprivation were found to be key to understand their heterogeneity and their differential  
6  
7 contribution to disability levels in this population. These outputs have direct implications for  
8  
9 researchers and clinicians.  
10

### 11 **Strengths and limitations of this study**

- 14 - We designed and implemented a data extraction strategy which showed high performance  
15 rates and allowed us to unlock data from 21 physical health conditions from around 15m  
16  
17 clinical documents with free text.
- 18 - We mapped how these health conditions are distributed across sex, age, ethnicity, social  
19  
20 disadvantage and severe mental illness diagnoses in a sample of 17500 patients from one  
21  
22 of Europe's largest providers of secondary mental healthcare, serving a geographic  
23  
24 catchment of approximately 1.32 million residents in London.
- 25 - We investigated the association between multimorbidity (2 or more conditions) and  
26  
27 disability using the Health of the Nation Outcome Scale (HoNOS) which is commonly  
28  
29 collected in secondary mental health services in the UK.
- 30 - This study focuses on a cohort of individuals with SMI which limits direct comparisons  
31  
32 with other mental health conditions and/or general population.
- 33 - Although some of the most frequent physical comorbidities were extracted, some specific  
34  
35 health conditions required to compute standard comorbidity scores (e.g., Charlson and  
36  
37 Exlihauser comorbidity indexes) were not included in this study.  
38  
39  
40  
41  
42  
43  
44  
45  
46  
47  
48  
49  
50  
51  
52  
53  
54  
55  
56  
57  
58  
59  
60

## Introduction

Two thirds of the deaths in individuals with severe mental illness (SMI) are potentially explained by the increased risk of multimorbidity in this population.[1–4] However, multimorbidity research in this population is still scarce[5] compounded by the limited availability of physical health data in SMI samples, increased non-response rates in surveys,[6] and physical health information in secondary mental health care data primarily hidden in free text fields.

Most research to date on physical health in SMI populations has focused on cardiometabolic risk factors, which are considered leading contributors to cardiovascular diseases in individuals with SMI,[7–10] or specific conditions such as immune-mediated inflammatory diseases (e.g., inflammatory bowel diseases, psoriasis),[11–13] multiple sclerosis, epilepsy and migraine.[14,15] This condition-specific vision limits our understanding of multimorbidity in SMI and studies that consider a larger number of conditions are needed. However, there are only a few studies which have considered multiple health conditions.[4,16,17] Woodhead et al.[4] showed an increased risk in multimorbidity in SMI patients, but only found epilepsy to be more prevalent as an individual condition. Kugathasan et al.[17] investigated combinations of diseases in schizophrenia at organ system level and found that 31% had complex multimorbidity with the most prevalent pairs including neurologic-endocrine, neurologic-respiratory and neurologic-viral. Similarly, epilepsy and arthritis was one of the most prevalent combinations in Dorrington et al.[16] Although these studies included multiple health conditions and confirmed the need of investigating further multimorbidity in SMI, they are still not comparable to multimorbidity studies in general populations[18–20] and they did not investigate potential differences between individuals with schizophrenia spectrum disorders (SSD) and bipolar disorders (BD). Understanding different



1  
2  
3 multimorbidity combinations between those groups could contribute to the ongoing debate around  
4 potential underlying biological mechanisms.[21–23] Ultimately, SSD and BD have been  
5 established as significant drivers of disability[24] and deficits in physical health have been  
6 implicated in the perpetuation of impairments in functional capacity and performance. [25,26]  
7  
8 However, research into the relationship between multimorbidity and disability in SMI is limited.  
9  
10 Within this context, our first aim was to design and develop a suitable strategy to extract  
11 information on physical health conditions from free text mental health records data which could  
12 be easily replicated in future multimorbidity research using similar resources. Our second objective  
13 was to examine the prevalence of these conditions and their most prevalent combinations in SMI  
14 and any differences across relevant sociodemographic factors and across SMI diagnoses (SSD vs  
15 BD). Our third objective was to investigate the association of overall multimorbidity and specific  
16 physical health conditions with levels of disability measured using the Health of the Nation  
17 Outcome Scales (HoNOS).  
18  
19  
20  
21  
22  
23  
24  
25  
26  
27  
28  
29  
30  
31

## 32 **Methods**

### 33 *Setting and sample*

34  
35 Patient data were extracted via the Clinical Record Interactive Search (CRIS), a case register  
36 platform that contains de-identified mental healthcare electronic health record data from the South  
37 London and Maudsley Trust NHS Foundation Trust (SLaM). SLaM is one of Europe's largest  
38 providers of secondary mental healthcare, serving a geographic catchment of approximately 1.32  
39 million residents, and providing almost complete coverage of secondary mental healthcare  
40 provision to all age groups. Since 2007, fully electronic clinical records have been deployed in  
41 SLaM, and data from these are accessible via CRIS system which allows searching and retrieval  
42 of anonymized full records for over 500,000 cases currently represented in the system.[27]  
43  
44  
45  
46  
47  
48  
49  
50  
51  
52  
53  
54  
55  
56  
57  
58  
59  
60

1  
2  
3 Our sample (N=17500) consisted of all individuals aged 15 years or older who had received a  
4 primary or secondary SMI diagnosis between 2007 and 2018 (International Classification of  
5 Mental and Behavioural Disorders 10<sup>th</sup> edition [ICD-10][28] codes F20-31). Given that one of our  
6 objectives was to compare SSD (F20-29) and BD (F30-31), individuals who over those 10 years  
7 of follow-up had diagnoses within both categories were excluded (n=804). Excluded individuals  
8 were more likely to be female, under the age of 35 at first SMI diagnosis recorded, Black ethnicity  
9 and have higher levels of social deprivation.  
10  
11  
12  
13  
14  
15  
16  
17  
18

### 19 *Physical health conditions*

20  
21 *Definitions and Information extraction.* To maximise comparability we sought to extract the  
22 following 21 physical health conditions representing chronic conditions commonly collected in  
23 multimorbidity studies using primary care data [18–20]: diabetes mellitus, heart failure, ischemic  
24 heart diseases, hypertension, coronary arteriosclerosis, chronic obstructive pulmonary disease  
25 (COPD), asthma, chronic kidney disease, cerebrovascular accident, transient ischemic attack,  
26 Parkinson's disease, multiple sclerosis, epilepsy, migraine, atrial fibrillation, chronic sinusitis,  
27 inflammatory bowel disease, chronic liver diseases, psoriasis, eczema and arthritis. These were  
28 mapped to SNOMED codes where the top concept was the group identifier and then all direct  
29 children of that concept were examined and individually reviewed by two clinicians (Appendix 1).  
30  
31  
32  
33  
34  
35  
36  
37  
38  
39  
40  
41  
42  
43  
44  
45  
46  
47  
48  
49  
50  
51  
52  
53  
54  
55  
56  
57  
58  
59  
60  
Physical health conditions were ascertained from data reported in text records from CRIS since  
2007 until 1st August 2019 for each individual resulting in around 15m documents.

To extract SNOMED concepts from free text we used MedCAT,[29] a medical concept annotation  
toolkit capable of named entity recognition linking (NER+L) with contextualization. The base  
model used is described in Kraljevic et al.,[29] and has shown very good performance (F1=0.90).  
In a first step, the base model was enriched with concept names from UMLS with the purpose of

1  
2  
3 increasing recall and potentially catching all different name-forms for each concept. In a second  
4 step, MedCAT was trained in an unsupervised fashion on all the available documents to increase  
5 precision. In a third step, all the free text was annotated for the chosen SNOMED concepts. For  
6 each condition, 300 documents were randomly extracted, which resulted in a total of 6300  
7 annotated documents.

8  
9  
10  
11  
12  
13  
14 *Annotation of physical health conditions.* To ensure consistent, high-quality gold standard and  
15 training data, we developed annotation guidelines based on series of iterative discussions including  
16 clinical and technical expertise. These guidelines, available upon request, were piloted and refined  
17 in preliminary stages. A relevant instance was defined as a mention of a physical health condition  
18 experienced by the patient and not negated. Each MedCAT detection was first validated as either  
19 correct/wrong - meaning the portion of text that was detected by MedCAT was either a  
20 correct/wrong detection of the relevant concept. Correct detections were further annotated with  
21 contextual annotations (or meta-annotations) for 'Diagnosis' and 'Status'. Diagnosis was used to  
22 determine if the detected concept is a patient related diagnosis, and Status if the detected concept  
23 is affirmed. Eight annotators were trained for this task and given the same  
24 instructions. MedCATtrainer[30] was used to facilitate manual annotations and each document  
25 was double annotated. Disagreements between annotators were further evaluated and resolved by  
26 a third annotator.

27  
28  
29  
30  
31  
32  
33  
34  
35  
36  
37  
38  
39  
40  
41  
42  
43  
44 *Training and validation.* Once the dataset was annotated it was split into a training and validation  
45 set. For NER+L, 70% of the dataset was used for training and 30% for validation. For meta-  
46 annotations, 80% was used for training and 20% for validation. Hyperparameter optimization in  
47 both cases used a 10-fold cross validation on the training set.

1  
2  
3 *Socio-demographics*. Extracted data included sex, age at SMI diagnosis (15-24, 25-34, 35-44, 45-  
4 54, 55-64, 65-74, 75+), and ethnicity (White British, Irish, Black Caribbean (including mixed  
5 White and Black Caribbean and any other Black background), Black African (including mixed  
6 White and Black African), South Asian (Indian, Pakistani and Bangladeshi) and Other). Index of  
7 Multiple Deprivation (IMD) was extracted as a measure of neighbourhood socioeconomic status  
8 at the level of the 2011 Lower Layer Super Output Area (LSOA11; a standard postal unit with an  
9 average 1500 residents) corresponding to the individual's address at time of SMI diagnosis. Using  
10 the IMD, each LSOA11 is ranked from 1 (most deprived) to 32,844 (least deprived) based on seven  
11 Census-derived indicators, which was subsequently divided into quintiles.[31]

12  
13  
14  
15  
16  
17  
18  
19  
20  
21  
22  
23  
24 *Disability*. Disability was measured using Health of the Nation Outcome Scales (HoNOS) [32]  
25 which is a clinician-rated tool developed to measure health and social functioning. It includes 12  
26 subscales: agitated behaviour; non-accidental self-injury; problem drinking or drug taking;  
27 cognitive problems; physical illness problems; problems associated with hallucinations or  
28 delusions; problems associated with depression; other mental and behaviour problems; problems  
29 with relationships; problems with activities of daily living; problems with living conditions; and  
30 problems with occupation and activities.[32] Total adjusted HoNOS scores of individuals at the  
31 first SMI diagnosis recorded in CRIS, or closest to that time, were used in this study. Higher scores  
32 for HoNOS indicate higher levels of impairment in the individual's functioning.

#### 33 34 35 36 37 38 39 40 41 42 43 44 45 *Statistical Analyses*

46  
47 To explore the suitability of MedCAT for extracting these physical health conditions from this  
48 cohort (objective 1), inter-rater agreement estimates were computed and performance, precision  
49 and recall per condition were estimated.  
50  
51  
52  
53  
54  
55  
56  
57  
58  
59  
60

1  
2  
3 To examine the prevalence of these conditions in SMI across relevant factors and compare the  
4 most prevalent multimorbidity combinations for individuals with BD and SSD (objective 2).  
5  
6 Descriptive statistics were derived for all the variables. Chi-square tests and Fisher's exact tests,  
7  
8 with Bonferroni correction for multiple comparisons, were performed to explore associations and  
9  
10 differences between BD and SSD.  
11  
12

13  
14 To address our third objective (to investigate the association of multimorbidity and specific  
15 physical health with levels of disability), we performed series of hierarchical linear regressions.  
16  
17 Models were adjusted by age and sex (Model 1), and then additionally adjusted by IMD (Model  
18  
19 2a) or SMI diagnosis (Model 2b). All analyses were performed using R 4.0.3 and RStudio  
20  
21 1.3.1093.  
22  
23

#### 24 25 26 *Patient and Public Involvement Statement*

27  
28 When designing this project, the Data Linkage Service User and Carer Advisory Group was  
29  
30 consulted and followed up presenting preliminary results. This is a well-established Patient and  
31  
32 Public Involvement Group set up by the Biomedical Research Center (BRC) at South London and  
33  
34 Maudsley Trust NHS Foundation Trust (SLaM).[33]  
35  
36

## 37 38 **Results**

### 39 40 *Inter-annotator agreement and model validation for data extraction*

41  
42 For each physical health condition, 300 documents were annotated to create a gold standard and  
43  
44 training data specific to each condition. All 6300 instances across 21 health conditions were double  
45  
46 annotated yielding an average inter-annotator agreement of 97% for NER+L, 82.70% for the meta-  
47  
48 annotation Diagnosis and 78.08% for the meta-annotation Status. Precision, recall and F1 metrics  
49  
50 of each modelled physical health condition are shown in Table 1. Coronary arteriosclerosis was  
51  
52 not extracted as the number of positive mentions was too small for training and validation. Overall  
53  
54  
55  
56  
57  
58  
59  
60

1  
2  
3 meta-annotations performance results showed good performance for Diagnosis and Status  
4  
5 (Supplemental Table 1).  
6

7  
8 PLEASE INSERT TABLE 1  
9

10 *Mapping of physical health conditions and comparison between SSD and BD*

11  
12 Our sample consisted of 17,500 individuals with SMI, of whom 74.4% were diagnosed with SSD  
13  
14 and 25.6% with BD. A slight majority were male (53.6%), and most individuals had their first SMI  
15  
16 diagnoses report under the age of 35 (42.8%). The White British group accounted for 35.7% of  
17  
18 our sample, followed by Black Caribbean (18.2%) and Black African (12.0%). The South Asian  
19  
20 and Irish groups were the smallest, with 3.1 and 2.0% respectively (Table 2). There were high  
21  
22 levels of deprivation in the cohort, with over 60% falling into the lowest two national quintiles.  
23  
24 Around 40% had at least one mention of a physical health condition and around 20% had two or  
25  
26 more physical conditions. There were significant differences between BD and SSD for most of the  
27  
28 socio-demographic characteristics and number of physical health conditions (Table 2 and Figure  
29  
30 1). Individuals with SSD were more likely to be men, from ethnic minorities, living in more  
31  
32 deprived neighbourhoods and had a higher number of physical health conditions recorded  
33  
34 compared to those with BD.  
35  
36  
37  
38  
39

40 The three most common physical health conditions recorded were diabetes, hypertension and  
41  
42 asthma (15.3%, 14.5% and 9.8% respectively), regardless of the specific SMI diagnoses  
43  
44 (Supplemental Figure 1 within SSD and BD). When we compared individuals with SSD and BD,  
45  
46 we found that the top 10 most prevalent health conditions were similar between groups but diabetes  
47  
48 (SSD 17% vs BD 10.7%), hypertension (SSD 15.9% vs BD 10.4%) and epilepsy (SSD 5.0% vs  
49  
50 BD 3.3%) prevalence rates were slightly higher for individuals with SSD while individuals with  
51  
52 BD showed higher prevalence rates of migraine (BD 4.3% vs SSD 2.9%).  
53  
54  
55  
56  
57  
58  
59  
60

## PLEASE INSERT TABLE 2 AND FIGURE 1 HERE

When we explored differences by sex in the whole cohort, we found that women were more likely to report hypertension, asthma, arthritis, eczema, and migraine compared to men (Supplemental Table 2). Within the individuals with SSD, women were found to be more likely to report higher rates of diabetes, chronic kidney disease (CKD), heart failure and transient ischaemic attack (TIA). Within individuals with BD, sex differences were only found for asthma, arthritis, migraine and ischemic heart disease. Women with BD were more likely to report asthma, arthritis and migraine while men with BD were more likely to report ischemic heart disease.

With regards to differences across age groups, we found higher prevalence rates of diabetes, hypertension, arthritis, cerebrovascular accident, ischaemic heart disease, COPD, CKD, Parkinson's disease, heart failure, atrial fibrillation and TIA in individuals in older age ranges, while asthma and migraine were more prevalent in younger age ranges (Supplemental Table 3, Supplemental Figure 2). We found similar results within individuals with SSD and BD (except for asthma and cerebrovascular accident in BD).

We found differences for ethnicity in individuals with diabetes, hypertension, asthma, arthritis, epilepsy, eczema, ischaemic heart disease, COPD and cerebrovascular accident (Figure 2, Supplemental Tables 4). Individuals from Black or South Asian minorities were more likely to show higher prevalence rates of diabetes and hypertension compared to those White British or Irish. Black Caribbean showed the highest prevalence rates of asthma or eczema among all other groups. Arthritis, COPD, epilepsy and IHD seem to be slightly more prevalent in White British or Irish, with epilepsy showing the highest prevalence rates among Irish. Similar trends were found within SSD and BD subgroups with diabetes rates higher in South Asians with BD (29.7%) compared to South Asians with SSD (20.7%); while diabetes rates in Black Caribbean with SSD

1  
2  
3 (24.4%) were higher than in those with BD (19.6%). With regards to social deprivation, we found  
4 that individuals with diabetes, hypertension, asthma, and COPD were more likely to be at higher  
5 levels of deprivation compared to those that did not have these specific conditions (Supplemental  
6 Table 5).  
7  
8  
9  
10  
11

12 PLEASE INSERT FIGURE 2 AROUND HERE  
13

14 *Multimorbidity combinations for the whole cohort and SSD and BD subgroups*  
15

16 Table 3 summarizes the ten most common physical comorbidities in patients with SMI, their  
17 prevalence, the mean number of comorbidities, and the three most frequently associated  
18 comorbidities, for the total cohort and by SMI diagnosis. While there were no clear differences in  
19 the mean number of comorbidities by SMI diagnosis, the presence of one physical condition  
20 predisposed individuals to at least having one other condition. The mean number of comorbidities  
21 in the total cohort was 0.74 jumped to at least 2.20 in the presence of one of the ten most common  
22 comorbidities. The three most commonly associated physical comorbidities remained relatively  
23 consistent by SMI diagnosis, with a few exceptions. The prevalence of associated comorbidities  
24 with epilepsy were lower in BD than in SSD; there is a fairly different comorbidity profile in  
25 migraine between SMI diagnoses; and, a lower rate of diabetes in individuals with comorbid BD  
26 and COPD (when compared to SSD). The most common combination of conditions included  
27 diabetes, hypertension and asthma, regardless of their SMI diagnoses. Most individuals with these  
28 combinations of conditions were also likely to have arthritis. Figures 3, 4 and 5 show the most  
29 prevalent conditions for individuals with SMI and comorbid diabetes, hypertension and asthma,  
30 respectively.  
31  
32  
33  
34  
35  
36  
37  
38  
39  
40  
41  
42  
43  
44  
45  
46  
47  
48  
49  
50

51 PLEASE INSERT TABLE 3 AND FIGURES 3,4 AND 5 AROUND HERE  
52

53 *Association with disability*  
54  
55  
56  
57  
58  
59  
60



1  
2  
3 HoNOS descriptive statistics for the whole SMI cohort (Mean=10.40, SD=6.06) and for those with  
4  
5 the ten most common physical comorbidities are shown in Table 4. Regression analyses showed  
6  
7 that individuals with any of these conditions (except migraine) showed higher HoNOS scores,  
8  
9 even after adjustments for age, sex, IMD or SMI diagnoses. We also examined whether simple  
10  
11 and complex multimorbidity was associated with HoNOS total score and we found a strong  
12  
13 positive association minimally attenuated after adjustments. Similar socio-demographics and  
14  
15 trends were found within BD and SSD groups (Supplemental Tables 6-8). However, associations  
16  
17 for diabetes, hypertension and ischaemic heart disease were fully attenuated after adjustments in  
18  
19 the SSD group and associations for hypertension were also fully attenuated after adjustments in  
20  
21 the BD group.  
22  
23  
24  
25

26 PLEASE INSERT TABLE 4 AROUND HERE  
27

## 28 **Discussion**

29  
30 The first objective of this study was to design and develop a suitable strategy to extract physical  
31  
32 health conditions which could be easily replicated in future multimorbidity research using mental  
33  
34 health electronic health records. The NLP strategy using MedCAT provided very good  
35  
36 performance estimates for all the conditions extracted, which supports its suitability to extract data  
37  
38 on physical health conditions from mental health clinical notes. These findings are consistent with  
39  
40 previous research which has used MedCAT to extract data from hospital settings.[34,35] This  
41  
42 resource should help to facilitate and promote research on multimorbidity using mental health  
43  
44 records, in general, and has the potential for direct replication in other mental health trusts which  
45  
46 have already deployed CRIS platforms.  
47  
48  
49

50  
51 Our second objective was to examine the prevalence of these conditions in SMI individuals and  
52  
53 compare the most prevalent multimorbidity combinations between individuals with BD and SSD.  
54  
55  
56  
57  
58  
59

1  
2  
3 When we examined differences in socio-demographic variables by diagnosis, our findings were  
4 largely consistent with previous research,[3,36–39] although associations between ethnicity and  
5 BD are less established.[40] With regards to sociodemographic differences, we found that women  
6 with SSD were more likely to have diabetes, CKD, heart failure and TIA compared to men with  
7 SSD; and women with BD were more likely to have asthma, arthritis and migraine compared to  
8 men with BD. Previous research in this population showed mixed results. Some studies found  
9 higher prevalence of hypertension in women with SSD[41] and diabetes in women in BD,[42] and  
10 others did not find relevant sex differences.[43] Our findings suggest that there could be an  
11 increased risk for diabetes and hypertension for females with an SMI diagnosis, especially with  
12 SSD. Further research in this line is needed.

13  
14 Ethnic differences were found for diabetes, hypertension, asthma, arthritis, epilepsy, eczema,  
15 ischaemic heart disease, COPD and cerebrovascular accident. Individuals from Black or South  
16 Asian minorities were more likely to show higher prevalence rates of diabetes and hypertension  
17 compared to White British or Irish. Black Caribbean showed the higher prevalence rates of asthma  
18 or eczema among all other groups. Arthritis, COPD, epilepsy and IHD seem to be slightly more  
19 prevalent in White British or Irish, with epilepsy showing the highest prevalence rates among Irish.  
20 Similar trends were found within SSD and BD subgroups with diabetes rates higher in South  
21 Asians with BD compared to South Asians with SSD, while diabetes rates in Black Caribbean with  
22 SSD were higher than in those with BD. These results largely mirror previous research in  
23 ethnicity.[44–50] When we examined social deprivation, individuals with diabetes, hypertension,  
24 asthma, and COPD were more likely to report the highest levels of deprivation regardless of their  
25 SMI diagnoses. Similar to ethnicity, these results are also consistent with findings in the general

1  
2  
3 population where higher levels of social deprivation are found in those with comorbid  
4 diabetes,[51,52] hypertension,[53] asthma[54] or COPD.[55]

7  
8 Overall, in the whole SMI cohort, around 40% of the individuals had at least one mention of a  
9  
10 physical health condition and close to 20% had two or more physical conditions, which could be  
11  
12 labelled as complex multimorbidity. These findings provide evidence to support previous research  
13  
14 suggestions about the increased probability of multimorbidity in this population.[3,17,56–59]

15  
16 Absolute numbers of physical health conditions were higher in patients with SSD than those with  
17  
18 BD. Although direct comparisons require caution, our findings partially contrast with previous  
19  
20 reports of higher number of physical comorbidities in individuals with BD.[3,38,39,41] Overall,  
21  
22 the top ten most prevalent conditions in our SMI cohort were diabetes, hypertension, asthma,  
23  
24 arthritis, epilepsy, cerebrovascular accident, eczema, migraine, ischaemic heart disease and  
25  
26 COPD; and the most common combination of conditions included diabetes, hypertension and  
27  
28 asthma, regardless of their SMI diagnoses. Moreover, those that had complex multimorbidity were  
29  
30 also more likely to have cardiometabolic comorbidities such as diabetes and hypertension, which  
31  
32 suggests that the cardiometabolic pathway might be one of the key explanatory mechanism  
33  
34 underlying the association between physical multimorbidity and severe mental illness.[60,61]  
35  
36 Future research should explore further the potential independent contribution of this pathway when  
37  
38 focusing on individuals with complex multimorbidity. Furthermore, arthritis was the most frequent  
39  
40 subsequent comorbidity for those with diabetes, hypertension and/or asthma, however for those  
41  
42 with SSD and asthma, eczema slightly displaced arthritis in terms of prevalence. These findings  
43  
44 might suggest that potential differences between SSD and BD phenotypes could be linked to  
45  
46 underlying inflammatory pathways. Future research focusing on inflammatory biomarkers could  
47  
48 be key to further our understanding of the potential differences between SSD and BD.  
49  
50  
51  
52  
53  
54  
55  
56  
57  
58  
59

1  
2  
3 In addition, we examined the association between the top ten most prevalent conditions and  
4 disability levels. We found that not only multimorbidity was clearly associated with higher levels  
5 of disability but having any of these specific conditions was associated with higher levels of  
6 disability, even after adjusting for age, sex, deprivation or SMI diagnoses. Similar results were  
7 found when we examined the associations between multimorbidity and disability within SSD and  
8 BD groups. When we examined the independent association of each physical health condition and  
9 disability within groups, our results suggested that socio-demographic factors could have a greater  
10 impact in these associations in individuals with SSD. Although our results are not directly  
11 comparable with previous studies, they are in line with findings in previous research in ageing[62]  
12 or some specific SMI populations.[63,64] Further research is needed to understand the potential  
13 shared drivers of disability in individuals with BD and these conditions, in general, and diabetes  
14 and BD, in particular.

15  
16  
17  
18  
19  
20  
21  
22  
23  
24  
25  
26  
27  
28  
29  
30  
31 One of the main strengths of this study is the large comprehensive cohort of people with SMI  
32 drawn from a population with a high ethnic diversity, addressing the neglect of both ethnic  
33 minority groups and SMI in multimorbidity research. This is a key advantage of using EHRs from  
34 a large secondary mental health care provider and having the benefits of a data extraction strategy  
35 to access data on physical health conditions from the text fields of clinical notes. MedCAT  
36 development and deployment in CRIS text records will hopefully promote and facilitate future  
37 research in mental healthcare. However, further research is needed to validate this strategy in other  
38 EHRs sources using free text. Although our results are promising and the comparability of the  
39 findings with previous research provides some evidence of validity, further research is also needed  
40 to examine the cross-validity using primary care structured fields data. The present study is limited  
41 to individuals with SMI which does not allow us to compare comorbidity figures of SMI with other  
42  
43  
44  
45  
46  
47  
48  
49  
50  
51  
52  
53  
54  
55  
56  
57  
58  
59  
60

1  
2  
3 common mental disorders and/or the general population. Future studies should replicate our data  
4  
5 extraction strategy in other sex and age matched cohorts and explore the potential risks for  
6  
7 subsequent health conditions maximizing the longitudinal nature of this data source. Furthermore,  
8  
9 it is also important to note that individuals with more severe SMI may have more comprehensive  
10  
11 textual data. Thus, our findings might be less representative of highly functioning individuals with  
12  
13 less severe SMI. In addition, we acknowledge that although the conditions considered are within  
14  
15 the most considered in multimorbidity research, future studies should consider a larger number of  
16  
17 conditions and include rare diseases and all the conditions needed to calculate standard  
18  
19 comorbidity scores such as Charlson or Exlihauser indexes which were not considered in this study  
20  
21 (e.g., hemiplegia or paraplegia, peptic ulcer disease or AIDS/HIV). It should be noted that our  
22  
23 study is one of the first, to our knowledge, to compare the associations between physical health  
24  
25 comorbidities and disability in this traditionally neglected population and HoNOS is a widely used  
26  
27 measure in secondary mental health services in the UK which provides us a general overview of  
28  
29 disability in this population. However, we acknowledge that further research with more objective  
30  
31 measures of disability is also needed to drive future policy in this population. To sum up, our study  
32  
33 provides an overview of the most prevalent health conditions in SMI and underlines the need for  
34  
35 further research into the origins of multimorbidity in this population, considering in more detail  
36  
37 the nature of the SMI both in terms of severity and in terms of constituent diagnoses and/or  
38  
39 symptomatic phenotype, given the apparent differences between BD and SSD. Our findings  
40  
41 highlight multimorbidity as a driver of disability in this population, which also requires further  
42  
43 mechanistic evaluation.  
44  
45  
46  
47  
48  
49  
50  
51  
52  
53  
54  
55  
56  
57  
58  
59  
60

1  
2  
3 **Acknowledgments:** We would like to thank Megan Pritchard and Mathew Broadbent for their  
4  
5 unvaluable contribution and support.  
6

7  
8 **Funding statement:**  
9

10 RB is funded in part by grant MR/R016372/1 for the King's College London MRC Skills  
11  
12 Development Fellowship programme funded by the UK Medical Research Council (MRC) and  
13  
14 by grant IS-BRC-1215-20018 for the National Institute for Health Research (NIHR) Biomedical  
15  
16 Research Centre at South London and Maudsley NHS Foundation Trust and King's College  
17  
18 London. JD is funded by the Health Foundation working together with the Academy of Medical  
19  
20 Sciences, for a Clinician Scientist Fellowship and by the ESRC in relation to the SEP-MD study  
21  
22 [ES/S002715/1] and part supported by the ESRC Centre for Society and Mental Health at King's  
23  
24 College London [ESRC Reference: ES/S012567/1]. DB is funded by a UKRI Innovation  
25  
26 Fellowship as part of Health Data Research UK MR/S00310X/. AM is funded by Takeda  
27  
28 California, Inc. RD, RS, AR are part-funded by the National Institute for Health Research  
29  
30 (NIHR) Biomedical Research Centre at South London and Maudsley NHS Foundation Trust and  
31  
32 King's College London. RD's work is supported by 1. National Institute for Health Research  
33  
34 (NIHR) Biomedical Research Centre at South London and Maudsley NHS Foundation Trust and  
35  
36 King's College London. 2. Health Data Research UK, which is funded by the UK Medical  
37  
38 Research Council, Engineering and Physical Sciences Research Council, Economic and Social  
39  
40 Research Council, Department of Health and Social Care (England), Chief Scientist Office of the  
41  
42 Scottish Government Health and Social Care Directorates, Health and Social Care Research and  
43  
44 Development Division (Welsh Government), Public Health Agency (Northern Ireland), British  
45  
46 Heart Foundation and Wellcome Trust. 3. The National Institute for Health Research University  
47  
48 College London Hospitals Biomedical Research Centre. This paper represents independent  
49  
50  
51  
52  
53  
54  
55  
56  
57  
58  
59  
60

1  
2  
3 research funded by the National Institute for Health Research (NIHR) Biomedical Research  
4  
5 Centre at South London and Maudsley NHS Foundation Trust and King's College London and  
6  
7 by the Health Foundation. The views expressed are those of the author(s) and not necessarily  
8  
9 those of the NHS, the NIHR, the Department of Health, the MRC, ESRC or King's College  
10  
11 London.  
12  
13

14 **Authors contributions:** RB conceived and designed the study. ZK, RB, AR and RS designed,  
15  
16 validated the data extraction strategy. ZK, TS and AM developed the natural language processing  
17  
18 algorithm and interface for the annotations. RB, ZK, JC, LM, NC, TS, AM, NS and TW were  
19  
20 annotators. RB, ZK, SS, LL, JC, SA, RD and DB performed the data analyses and/or interpreted  
21  
22 the results. RS and JD provided clinically relevant input over all the stages. RB, ZK and SS drafted  
23  
24 the first version of the manuscript and all authors critically reviewed the manuscript and  
25  
26 contributed to writing the final version.  
27  
28  
29

30 **Data sharing statement:** Due to the confidential nature of free-text data, we are unable to make  
31  
32 patient-level data available. CRIS was developed with extensive involvement from service users  
33  
34 and adheres to strict governance frameworks managed by service users. It has passed a robust  
35  
36 ethics approval pro-cess acutely attentive to the use of patient data. Specifically, this system was  
37  
38 approved as a dataset for secondary data analysis on this basis by Oxfordshire Research Ethics  
39  
40 Committee C (08/H06060/71). The data is de-identified and used in a data-secure format and all  
41  
42 patients have the choice to opt-out of their anonymized data being used. Approval for data  
43  
44 access can only be provided from the CRIS Oversight Committee at SLAM.  
45  
46  
47

48 **Competing interest statements:** No competing interests.  
49  
50

51 **Ethics statement:** This project was approved by the CRIS Oversight Committee which is  
52  
53 responsible for ensuring all research applications comply with ethical and legal guidelines. The  
54  
55  
56  
57  
58  
59

1  
2  
3 CRIS system enables access to anonymised electronic patient records for secondary analysis from  
4  
5 SLaM and has full ethical approvals.  
6  
7  
8  
9

## 10 **References**

- 11  
12 1 Firth J, Rosenbaum S, Galletly C, *et al*. Protecting physical health in people with mental  
13  
14 illness – Authors’ reply. *Lancet Psychiatry* 2019;**6**:890–1. doi:10.1016/S2215-  
15  
16 0366(19)30387-6  
17  
18
- 19 2 Lawrence D, Kisely S, Pais J. The Epidemiology of Excess Mortality in People with Mental  
20  
21 Illness. *Can J Psychiatry* 2010;**55**:752–60. doi:10.1177/070674371005501202  
22  
23
- 24 3 Reilly S, Olier I, Planner C, *et al*. Inequalities in physical comorbidity: a longitudinal  
25  
26 comparative cohort study of people with severe mental illness in the UK. *BMJ Open*  
27  
28 2015;**5**:e009010. doi:10.1136/bmjopen-2015-009010  
29  
30
- 31 4 Woodhead C, Ashworth M, Schofield P, *et al*. Patterns of physical co-/multi-morbidity  
32  
33 among patients with serious mental illness: a London borough-based cross-sectional study.  
34  
35 *BMC Fam Pract* 2014;**15**:117. doi:10.1186/1471-2296-15-117  
36  
37
- 38 5 Filipcic IŠ, Bajic Ž, Filipcic I. The onset and accumulation of physical multimorbidity in  
39  
40 severe and common mental disorders. *Curr Opin Psychiatry* 2020;**33**:484–90.  
41  
42 doi:10.1097/YCO.0000000000000635  
43  
44
- 45 6 Cheung KL, ten Klooster PM, Smit C, *et al*. The impact of non-response bias due to  
46  
47 sampling in public health studies: A comparison of voluntary versus mandatory recruitment  
48  
49 in a Dutch national survey on adolescent health. *BMC Public Health* 2017;**17**.  
50  
51 doi:10.1186/s12889-017-4189-8  
52  
53  
54  
55  
56  
57  
58  
59  
60



- 1  
2  
3 7 Correll CU, Detraux J, Lepeleire JD, *et al.* Effects of antipsychotics, antidepressants and  
4 mood stabilizers on risk for physical diseases in people with schizophrenia, depression and  
5 bipolar disorder. *World Psychiatry* 2015;**14**:119–36. doi:<https://doi.org/10.1002/wps.20204>  
6  
7  
8  
9  
10 8 Correll CU, Solmi M, Veronese N, *et al.* Prevalence, incidence and mortality from  
11 cardiovascular disease in patients with pooled and specific severe mental illness: a large-  
12 scale meta-analysis of 3,211,768 patients and 113,383,368 controls. *World Psychiatry*  
13 2017;**16**:163–80. doi:<https://doi.org/10.1002/wps.20420>  
14  
15  
16  
17  
18  
19 9 DE HERT M, CORRELL CU, BOBES J, *et al.* Physical illness in patients with severe  
20 mental disorders. I. Prevalence, impact of medications and disparities in health care. *World*  
21 *Psychiatry* 2011;**10**:52–77.  
22  
23  
24  
25  
26 10 Fan Z, Wu Y, Shen J, *et al.* Schizophrenia and the risk of cardiovascular diseases: A meta-  
27 analysis of thirteen cohort studies. *J Psychiatr Res* 2013;**47**:1549–56.  
28  
29  
30  
31  
32  
33 11 Pouget JG, Schizophrenia Working Group of the Psychiatric Genomics Consortium, Han B,  
34 *et al.* Cross-disorder analysis of schizophrenia and 19 immune-mediated diseases identifies  
35 shared genetic risk. *Hum Mol Genet* 2019;**28**:3498–513. doi:[10.1093/hmg/ddz145](https://doi.org/10.1093/hmg/ddz145)  
36  
37  
38  
39  
40 12 Rosenblat JD, McIntyre RS. Are medical comorbid conditions of bipolar disorder due to  
41 immune dysfunction? *Acta Psychiatr Scand* 2015;**132**:180–91.  
42  
43  
44  
45  
46  
47 13 Tylee DS, Sun J, Hess JL, *et al.* Genetic correlations among psychiatric and immune-related  
48 phenotypes based on genome-wide association data. *Am J Med Genet B Neuropsychiatr*  
49 *Genet* 2018;**177**:641–57. doi:<https://doi.org/10.1002/ajmg.b.32652>  
50  
51  
52  
53  
54  
55  
56  
57  
58  
59

- 1  
2  
3 14 Leo RJ, Singh J. Migraine headache and bipolar disorder comorbidity: A systematic review  
4 of the literature and clinical implications. *Scand J Pain* 2016;**11**:136–45.  
5  
6 doi:10.1016/j.sjpain.2015.12.002  
7  
8  
9  
10 15 McKay KA, Tremlett H, Fisk JD, *et al.* Psychiatric comorbidity is associated with disability  
11 progression in multiple sclerosis. *Neurology* 2018;**90**:e1316–23.  
12  
13 doi:10.1212/WNL.0000000000005302  
14  
15  
16  
17 16 Dorrington S, Carr E, Stevelink SAM, *et al.* Multimorbidity and fit note receipt in working-  
18 age adults with long-term health conditions. *Psychol Med* undefined/ed;:1–10.  
19  
20 doi:10.1017/S0033291720002937  
21  
22  
23  
24 17 Kugathasan P, Wu H, Gaughran F, *et al.* Association of physical health multimorbidity with  
25 mortality in people with schizophrenia spectrum disorders: Using a novel semantic search  
26 system that captures physical diseases in electronic patient records. *Schizophr Res*  
27  
28 2020;**216**:408–15. doi:10.1016/j.schres.2019.10.061  
29  
30  
31  
32  
33 18 Barnett K, Mercer SW, Norbury M, *et al.* Epidemiology of multimorbidity and implications  
34 for health care, research, and medical education: a cross-sectional study. *The Lancet*  
35  
36 2012;**380**:37–43. doi:10.1016/S0140-6736(12)60240-2  
37  
38  
39  
40 19 Cassell A, Edwards D, Harshfield A, *et al.* The epidemiology of multimorbidity in primary  
41 care: a retrospective cohort study. *Br J Gen Pract* 2018;**68**:e245–51.  
42  
43 doi:10.3399/bjgp18X695465  
44  
45  
46  
47 20 Kuan V, Denaxas S, Gonzalez-Izquierdo A, *et al.* A chronological map of 308 physical and  
48 mental health conditions from 4 million individuals in the English National Health Service.  
49  
50 *Lancet Digit Health* 2019;**1**:e63–77. doi:10.1016/S2589-7500(19)30012-3  
51  
52  
53  
54  
55  
56  
57  
58  
59  
60

- 1  
2  
3 21 Altamura AC, Buoli M, Pozzoli S. Role of immunological factors in the pathophysiology  
4 and diagnosis of bipolar disorder: Comparison with schizophrenia. *Psychiatry Clin Neurosci*  
5 2014;**68**:21–36. doi:<https://doi.org/10.1111/pcn.12089>  
6  
7  
8  
9  
10 22 Sahu A, Chowdhury HA, Gaikwad M, *et al.* Integrative network analysis identifies  
11 differential regulation of neuroimmune system in Schizophrenia and Bipolar disorder. *Brain*  
12 *Behav Immun - Health* 2020;**2**:100023. doi:10.1016/j.bbih.2019.100023  
13  
14  
15  
16  
17 23 Walker J, Curtis V, Shaw P, *et al.* Schizophrenia and bipolar disorder are distinguished  
18 mainly by differences in neurodevelopment. *Neurotox Res* 2002;**4**:427.  
19  
20  
21  
22  
23  
24 24 WHO | The world health report 2001 - Mental Health: New Understanding, New Hope.  
25  
26  
27  
28  
29 25 Prediction of disability in schizophrenia: Symptoms, cognition, and self-assessment - Philip  
30  
31  
32  
33  
34  
35  
36 26 Sanchez-Moreno J, Martinez-Aran A, Tabarés-Seisdedos R, *et al.* Functioning and Disability  
37 in Bipolar Disorder: An Extensive Review. *Psychother Psychosom* 2009;**78**:285–97.  
38  
39  
40  
41  
42  
43 27 Stewart R, Soremekun M, Perera G, *et al.* The South London and Maudsley NHS Foundation  
44  
45  
46  
47  
48  
49 28 ICD-10 Version:2016. <https://icd.who.int/browse10/2016/en> (accessed 9 Jun 2021).  
50  
51  
52  
53  
54  
55  
56  
57  
58  
59  
60

- 1  
2  
3 29 Kraljevic Z, Searle T, Shek A, *et al.* Multi-domain Clinical Natural Language Processing  
4 with MedCAT: the Medical Concept Annotation Toolkit. *ArXiv201001165 Cs* Published  
5 Online First: 25 March 2021. <http://arxiv.org/abs/2010.01165> (accessed 4 Jun 2021).  
6  
7  
8  
9  
10 30 Searle T, Kraljevic Z, Bendayan R, *et al.* MedCATTrainer: A Biomedical Free Text  
11 Annotation Interface with Active Learning and Research Use Case Specific Customisation.  
12 *ArXiv190707322 Cs* Published Online First: 16 July 2019. <http://arxiv.org/abs/1907.07322>  
13 (accessed 19 Aug 2020).  
14  
15  
16  
17  
18  
19 31 English indices of deprivation 2019: technical report. GOV.UK.  
20 [https://www.gov.uk/government/publications/english-indices-of-deprivation-2019-technical-](https://www.gov.uk/government/publications/english-indices-of-deprivation-2019-technical-report)  
21 report (accessed 4 Jun 2021).  
22  
23  
24  
25  
26 32 Wing JK, Beevor AS, Curtis RH, *et al.* Health of the Nation Outcome Scales (HoNOS):  
27 Research and development. *Br J Psychiatry* 1998;**172**:11–8. doi:10.1192/bjp.172.1.11  
28  
29  
30  
31 33 Jewell A, Pritchard M, Barrett K, *et al.* The Maudsley Biomedical Research Centre (BRC)  
32 data linkage service user and carer advisory group: creating and sustaining a successful  
33 patient and public involvement group to guide research in a complex area. *Res Involv*  
34 *Engagem* 2019;**5**:20. doi:10.1186/s40900-019-0152-4  
35  
36  
37  
38  
39  
40 34 Bean DM, Kraljevic Z, Searle T, *et al.* Angiotensin-converting enzyme inhibitors and  
41 angiotensin II receptor blockers are not associated with severe COVID-19 infection in a  
42 multi-site UK acute hospital trust. *Eur J Heart Fail* 2020;**22**:967–74.  
43  
44  
45  
46  
47 doi:<https://doi.org/10.1002/ejhf.1924>  
48  
49  
50 35 Carr E, Bendayan R, Bean D, *et al.* Evaluation and improvement of the National Early  
51 Warning Score (NEWS2) for COVID-19: a multi-hospital study. *BMC Med* 2021;**19**:23.  
52  
53  
54  
55  
56  
57  
58  
59  
60

- 1  
2  
3 36 Birgenheir DG, Ilgen MA, Bohnert ASB, *et al.* Pain conditions among veterans with  
4 schizophrenia or bipolar disorder. *Gen Hosp Psychiatry* 2013;**35**:480–4.  
5  
6 doi:10.1016/j.genhosppsy.2013.03.019  
7  
8  
9  
10 37 Haroon S, Hayes JF, Blackburn R, *et al.* Recording of Severe Mental Illness in United  
11 Kingdom Primary Care, 2000–2010. *PLOS ONE* 2013;**8**:e82365.  
12  
13 doi:10.1371/journal.pone.0082365  
14  
15  
16 38 Smith DJ, Langan J, McLean G, *et al.* Schizophrenia is associated with excess multiple  
17 physical-health comorbidities but low levels of recorded cardiovascular disease in primary  
18 care: cross-sectional study. *BMJ Open* 2013;**3**:e002808. doi:10.1136/bmjopen-2013-002808  
19  
20  
21  
22 39 Smith DJ, Martin D, McLean G, *et al.* Multimorbidity in bipolar disorder and undertreatment  
23 of cardiovascular disease: a cross sectional study. *BMC Med* 2013;**11**:263.  
24  
25  
26  
27  
28  
29  
30  
31 40 Halvorsrud K, Nazroo J, Otis M, *et al.* Ethnic inequalities in the incidence of diagnosis of  
32 severe mental illness in England: a systematic review and new meta-analyses for non-  
33 affective and affective psychoses. *Soc Psychiatry Psychiatr Epidemiol* 2019;**54**:1311–23.  
34  
35  
36  
37  
38  
39  
40  
41 41 Oreški I, Jakovljević M, Aukst-Margetić B, *et al.* Comorbidity and multimorbidity in  
42 patients with schizophrenia and bipolar disorder: similarities and differences. *Psychiatr*  
43  
44  
45  
46  
47 42 Patel RS, Virani S, Saeed H, *et al.* Gender Differences and Comorbidities in U.S. Adults  
48 with Bipolar Disorder. *Brain Sci* 2018;**8**:168. doi:10.3390/brainsci8090168  
49  
50  
51  
52 43 Severe mental illness (SMI) and physical health inequalities: briefing. GOV.UK.  
53  
54  
55  
56  
57  
58  
59  
60

- 1  
2  
3 inequalities/severe-mental-illness-and-physical-health-inequalities-briefing (accessed 4 Jun  
4  
5 2021).
- 6  
7  
8 44 Das-Munshi J, Ashworth M, Dewey ME, *et al*. Type 2 diabetes mellitus in people with  
9  
10 severe mental illness: inequalities by ethnicity and age. Cross-sectional analysis of 588 408  
11 records from the UK. *Diabet Med* 2017;**34**:916–24. doi:<https://doi.org/10.1111/dme.13298>
- 12  
13  
14 45 Gaughran F, Stahl D, Stringer D, *et al*. Effect of lifestyle, medication and ethnicity on  
15  
16 cardiometabolic risk in the year following the first episode of psychosis: prospective cohort  
17 study. *Br J Psychiatry* 2019;**215**:712–9. doi:10.1192/bjp.2019.159
- 18  
19  
20  
21 46 Lusignan S de, Alexander H, Broderick C, *et al*. The epidemiology of eczema in children and  
22  
23 adults in England: A population-based study using primary care data. *Clin Exp Allergy*  
24 2021;**51**:471–82. doi:<https://doi.org/10.1111/cea.13784>
- 25  
26  
27  
28 47 Gilkes A, Ashworth M, Schofield P, *et al*. Does COPD risk vary by ethnicity? A  
29  
30 retrospective cross-sectional study. *Int J Chron Obstruct Pulmon Dis* 2016;**11**:739–46.  
31  
32 doi:10.2147/COPD.S96391
- 33  
34  
35 48 Godsland IF, Johnston DG, Chaturvedi N. Mechanisms of Disease: lessons from ethnicity in  
36  
37 the role of triglyceride metabolism in ischemic heart disease. *Nat Clin Pract Endocrinol*  
38 *Metab* 2007;**3**:530–8. doi:10.1038/ncpendmet0530
- 39  
40  
41  
42 49 Health Survey for England - 2004: Health of ethnic minorities, Headline results. NHS Digit.  
43  
44 [https://digital.nhs.uk/data-and-information/publications/statistical/health-survey-for-](https://digital.nhs.uk/data-and-information/publications/statistical/health-survey-for-england/health-survey-for-england-2004-health-of-ethnic-minorities-headline-results)  
45  
46 [england/health-survey-for-england-2004-health-of-ethnic-minorities-headline-results](https://digital.nhs.uk/data-and-information/publications/statistical/health-survey-for-england/health-survey-for-england-2004-health-of-ethnic-minorities-headline-results)  
47  
48 (accessed 4 Jun 2021).
- 49  
50  
51 50 Public Health Profiles - PHE. <https://fingertips.phe.org.uk/> (accessed 4 Jun 2021).  
52  
53  
54  
55  
56  
57  
58  
59  
60

- 1  
2  
3 51 Zghebi SS, Steinke DT, Carr MJ, *et al.* Examining trends in type 2 diabetes incidence,  
4 prevalence and mortality in the UK between 2004 and 2014. *Diabetes Obes Metab*  
5 2017;**19**:1537–45. doi:<https://doi.org/10.1111/dom.12964>  
6  
7  
8  
9  
10 52 Diabetes Prevention Programme, 2017-18 Diagnoses and Demographics. NHS Digit.  
11 [https://digital.nhs.uk/data-and-information/publications/statistical/national-diabetes-](https://digital.nhs.uk/data-and-information/publications/statistical/national-diabetes-audit/diabetes-prevention-programme-2017-18)  
12 [audit/diabetes-prevention-programme-2017-18](https://digital.nhs.uk/data-and-information/publications/statistical/national-diabetes-audit/diabetes-prevention-programme-2017-18) (accessed 4 Jun 2021).  
13  
14  
15  
16  
17 53 Leng B, Jin Y, Li G, *et al.* Socioeconomic status and hypertension: a meta-analysis. *J*  
18 *Hypertens* 2015;**33**:221–9. doi:10.1097/HJH.0000000000000428  
19  
20  
21 54 Gupta RP, Mukherjee M, Sheikh A, *et al.* Persistent variations in national asthma mortality,  
22 hospital admissions and prevalence by socioeconomic status and region in England. *Thorax*  
23 2018;**73**:706–12. doi:10.1136/thoraxjnl-2017-210714  
24  
25  
26  
27  
28 55 Simpson CR, Hippisley-Cox J, Sheikh A. Trends in the epidemiology of chronic obstructive  
29 pulmonary disease in England: a national study of 51 804 patients. *Br J Gen Pract*  
30 2010;**60**:e277–84. doi:10.3399/bjgp10X514729  
31  
32  
33  
34  
35 56 Carney CP, Jones L, Woolson RF. Medical comorbidity in women and men with  
36 schizophrenia. *J Gen Intern Med* 2006;**21**:1133–7. doi:10.1111/j.1525-1497.2006.00563.x  
37  
38  
39  
40 57 Gabilondo A, Alonso-Moran E, Nuño-Solinis R, *et al.* Comorbidities with chronic physical  
41 conditions and gender profiles of illness in schizophrenia. Results from PREST, a new health  
42 dataset. *J Psychosom Res* 2017;**93**:102–9. doi:10.1016/j.jpsychores.2016.12.011  
43  
44  
45  
46  
47 58 Kugathasan P, Stubbs B, Aagaard J, *et al.* Increased mortality from somatic multimorbidity  
48 in patients with schizophrenia: a Danish nationwide cohort study. *Acta Psychiatr Scand*  
49 2019;**140**:340–8. doi:10.1111/acps.13076  
50  
51  
52  
53  
54  
55  
56  
57  
58  
59  
60

- 1  
2  
3 59 Severe mental illness (SMI) and physical health inequalities: briefing. GOV.UK.  
4  
5 [https://www.gov.uk/government/publications/severe-mental-illness-smi-physical-health-](https://www.gov.uk/government/publications/severe-mental-illness-smi-physical-health-inequalities/severe-mental-illness-and-physical-health-inequalities-briefing)  
6 [inequalities/severe-mental-illness-and-physical-health-inequalities-briefing](https://www.gov.uk/government/publications/severe-mental-illness-smi-physical-health-inequalities/severe-mental-illness-and-physical-health-inequalities-briefing) (accessed 3 Mar  
7  
8 2020).  
9  
10  
11  
12 60 Firth J, Siddiqi N, Koyanagi A, *et al*. The Lancet Psychiatry Commission: a blueprint for  
13  
14 protecting physical health in people with mental illness. *Lancet Psychiatry* 2019;**6**:675–712.  
15  
16 doi:10.1016/S2215-0366(19)30132-4  
17  
18  
19 61 Henderson DC, Vincenzi B, Andrea NV, *et al*. Pathophysiological mechanisms of increased  
20  
21 cardiometabolic risk in people with schizophrenia and other severe mental illnesses. *Lancet*  
22  
23 *Psychiatry* 2015;**2**:452–64. doi:10.1016/S2215-0366(15)00115-7  
24  
25  
26 62 Quiñones AR, Markwardt S, Botosaneanu A. Multimorbidity Combinations and Disability in  
27  
28 Older Adults. *J Gerontol A Biol Sci Med Sci* 2016;**71**:823–30. doi:10.1093/gerona/glw035  
29  
30  
31 63 Desalegn D, Girma S, Abdeta T. Quality of life and its association with current substance  
32  
33 use, medication non-adherence and clinical factors of people with schizophrenia in  
34  
35 Southwest Ethiopia: a hospital-based cross-sectional study. *Health Qual Life Outcomes*  
36  
37 2020;**18**. doi:10.1186/s12955-020-01340-0  
38  
39  
40 64 McIntyre RS, Konarski JZ, Soczynska JK, *et al*. Medical Comorbidity in Bipolar Disorder:  
41  
42 Implications for Functional Outcomes and Health Service Utilization. *Psychiatr Serv*  
43  
44 2006;**57**:1140–4. doi:10.1176/ps.2006.57.8.1140  
45  
46  
47  
48  
49  
50  
51  
52  
53  
54  
55  
56  
57  
58  
59  
60



Table 1. MedCAT performance F1, precision and recall estimates for each physical health conditions.

| <b>Physical Health Condition</b>         | <b>F1</b> | <b>Precision</b> | <b>Recall</b> |
|------------------------------------------|-----------|------------------|---------------|
| Diabetes mellitus                        | 0.98      | 0.99             | 0.98          |
| Heart failure                            | 0.97      | 0.97             | 0.96          |
| Ischemic heart disease                   | 0.98      | 0.97             | 0.99          |
| Hypertensive disorder, systemic arterial | 0.97      | 0.97             | 0.96          |
| Chronic obstructive lung disease         | 0.94      | 0.97             | 0.92          |
| Asthma                                   | 1.00      | 1.00             | 1.00          |
| Chronic kidney disease                   | 1.00      | 1.00             | 0.99          |
| Cerebrovascular accident                 | 0.96      | 0.94             | 0.98          |
| Transient ischemic attack                | 0.91      | 0.82             | 1.00          |
| Parkinson's disease                      | 0.94      | 0.88             | 1.00          |
| Multiple sclerosis                       | 1.00      | 1.00             | 1.00          |
| Epilepsy                                 | 0.93      | 1.00             | 0.85          |
| Migraine                                 | 1.00      | 1.00             | 1.00          |
| Atrial fibrillation                      | 0.98      | 1.00             | 0.96          |
| Chronic sinusitis                        | 0.98      | 0.97             | 1.00          |
| Inflammatory bowel disease               | 0.96      | 1.00             | 0.92          |
| Chronic liver disease                    | 1.00      | 1.00             | 1.00          |
| Psoriasis                                | 1.00      | 1.00             | 1.00          |
| Eczema                                   | 0.94      | 1.00             | 0.88          |
| Arthritis                                | 1.00      | 1.00             | 1.00          |

Table 2. Socio-demographic characteristics and prevalence for physical health conditions for total cohort (N=17500) and by SMI diagnosis.

|                                         | <b>Total</b> | <b>SSD</b>   | <b>BD</b>   |
|-----------------------------------------|--------------|--------------|-------------|
| <b>N (%)</b>                            | 17500        | 13019 (74.4) | 4481 (25.6) |
| <b>Sex***</b>                           |              |              |             |
| Female                                  | 8123 (46.4)  | 5421 (41.6)  | 2702 (60.3) |
| Male                                    | 9374 (53.6)  | 7596 (58.3)  | 1778 (39.7) |
| <b>Age at first SMI diagnosis***</b>    |              |              |             |
| 15 – 34                                 | 7497 (42.8)  | 5607 (43.1)  | 1890 (42.2) |
| 35 – 44                                 | 3736 (21.3)  | 2792 (21.4)  | 944 (21.1)  |
| 45 – 54                                 | 2783 (15.9)  | 2057 (15.8)  | 726 (16.2)  |
| 55 – 64                                 | 1525 (8.7)   | 1067 (8.2)   | 458 (10.2)  |
| 65+                                     | 1959 (11.2)  | 1496 (11.5)  | 463 (10.3)  |
| <b>Ethnicity***</b>                     |              |              |             |
| White British                           | 6243 (35.7)  | 4008 (30.8)  | 2235 (49.9) |
| Black Caribbean                         | 3182 (18.2)  | 2799 (21.5)  | 383 (8.5)   |
| Black African                           | 2094 (12.0)  | 1886 (14.5)  | 208 (4.6)   |
| South Asian                             | 549 (3.1)    | 421 (3.2)    | 128 (2.9)   |
| Irish                                   | 346 (2.0)    | 240 (1.8)    | 106 (2.4)   |
| Other                                   | 3846 (22.0)  | 2822 (21.7)  | 1024 (22.9) |
| Not stated                              | 1240 (7.1)   | 843 (6.5)    | 397 (8.9)   |
| <b>Index of multiple deprivation***</b> |              |              |             |
| 1 (less deprived)                       | 742 (4.2)    | 412 (3.2)    | 330 (7.4)   |
| 2                                       | 1384 (7.9)   | 887 (6.8)    | 497 (11.1)  |
| 3                                       | 3575 (20.4)  | 2503 (19.2)  | 1072 (23.9) |
| 4                                       | 7073 (40.4)  | 5476 (42.1)  | 1597 (35.6) |
| 5 (more deprived)                       | 4033 (23.0)  | 3204 (24.6)  | 829 (18.5)  |
| Unknown                                 | 693 (4.0)    | 537 (4.1)    | 156 (3.5)   |
| <b>Number of conditions***</b>          |              |              |             |
| No mentions                             | 10468 (59.8) | 7540 (57.9)  | 2928 (65.3) |
| One                                     | 3733 (21.3)  | 2888 (22.2)  | 845 (18.9)  |
| Two                                     | 1795 (10.3)  | 1429 (11.0)  | 366 (8.2)   |
| Three or more                           | 1504 (8.6)   | 1162 (8.9)   | 342 (7.6)   |
| <b>Physical conditions***</b>           |              |              |             |
| Diabetes***                             | 2686 (15.3)  | 2208 (17.0)  | 478 (10.7)  |
| Hypertension***                         | 2537 (14.5)  | 2070 (15.9)  | 467 (10.4)  |
| Asthma                                  | 1722 (9.8)   | 1291 (9.9)   | 431 (9.6)   |
| Arthritis                               | 954 (5.5)    | 702 (5.4)    | 252 (5.6)   |
| Epilepsy***                             | 799 (4.6)    | 652 (5.0)    | 147 (3.3)   |
| Cerebrovascular accident                | 728 (4.2)    | 573 (4.4)    | 155 (3.5)   |
| Eczema                                  | 616 (3.5)    | 479 (3.7)    | 137 (3.1)   |

|    |                               |           |           |           |
|----|-------------------------------|-----------|-----------|-----------|
| 1  |                               |           |           |           |
| 2  |                               |           |           |           |
| 3  | Migraine***                   | 564 (3.2) | 372 (2.9) | 192 (4.3) |
| 4  | Ischemic heart disease        | 561 (3.2) | 435 (3.3) | 126 (2.8) |
| 5  | Chronic Obstructive Pulmonary |           |           |           |
| 6  | disease                       | 476 (2.7) | 342 (2.6) | 134 (3.0) |
| 7  |                               |           |           |           |
| 8  | Chronic kidney disease*       | 279 (1.6) | 179 (1.4) | 100 (2.2) |
| 9  | Parkinson's disease           | 266 (1.5) | 201 (1.5) | 65 (1.5)  |
| 10 | Heart failure**               | 222 (1.3) | 187 (1.4) | 35 (0.8)  |
| 11 | Psoriasis                     | 179 (1.0) | 129 (1.0) | 50 (1.1)  |
| 12 | Atrial fibrillation           | 133 (0.8) | 100 (0.8) | 33 (0.7)  |
| 13 | Transient Ischaemic Attack    | 130 (0.7) | 91 (0.7)  | 39 (0.9)  |
| 14 | Inflammatory Bowel Disease    | 40 (0.2)  | 25 (0.2)  | 15 (0.3)  |
| 15 | Multiple sclerosis            | 32 (0.2)  | 19 (0.1)  | 13 (0.3)  |
| 16 | Chronic liver disease         | 22 (0.1)  | 20 (0.2)  | 2 (0.0)   |
| 17 | Chronic sinusitis             | 6 (0.0)   | 6 (0.0)   | 0 (0.0)   |
| 18 |                               |           |           |           |

Note. \*\*\* p < .001; \*\* p < .01; \* p < .05 for comparisons between BD and SSD groups

peer review only

Table 3. Ten most prevalent conditions and associated comorbidities of the total cohort and by SMI diagnosis.

| Condition                      | Prevalence   | Mean # of comorbidities | Three most frequent associated comorbidities |                     |                      |                      |
|--------------------------------|--------------|-------------------------|----------------------------------------------|---------------------|----------------------|----------------------|
|                                | <i>Total</i> | -                       | 0.74                                         | 1. Diabetes (15.3%) | 2. HTN (14.5%)       | 3. Asthma (9.8%)     |
|                                | <i>SSD</i>   | -                       | 0.77                                         | 1. Diabetes (17.0%) | 2. HTN (15.9%)       | 3. Asthma (9.9%)     |
|                                | <i>BD</i>    | -                       | 0.64                                         | 1. Diabetes (10.7%) | 2. HTN (10.4%)       | 3. Asthma (9.6%)     |
| <b>Diabetes</b>                | <i>Total</i> | 15.3%                   | 2.35                                         | 1. HTN (42.1%)      | 2. Asthma (16.9%)    | 3. Arthritis (13.2%) |
|                                | <i>SSD</i>   | 17.0%                   | 2.33                                         | 1. HTN (42.9%)      | 2. Asthma (16.3%)    | 3. Arthritis (12.7%) |
|                                | <i>BD</i>    | 10.7%                   | 2.45                                         | 1. HTN (38.3%)      | 2. Asthma (19.5%)    | 3. Arthritis (15.5%) |
| <b>Hypertension</b>            | <i>Total</i> | 14.5%                   | 2.50                                         | 1. Diabetes (44.5%) | 2. Asthma (16.3%)    | 3. Arthritis (15.2%) |
|                                | <i>SSD</i>   | 15.9%                   | 2.47                                         | 1. Diabetes (45.7%) | 2. Asthma (16.1%)    | 3. Arthritis (14.7%) |
|                                | <i>BD</i>    | 10.4%                   | 2.62                                         | 1. Diabetes (39.2%) | 2. Arthritis (17.3%) | 3. Asthma (17.1%)    |
| <b>Asthma</b>                  | <i>Total</i> | 9.8%                    | 2.27                                         | 1. Diabetes (26.3%) | 2. HTN (24.0%)       | 3. Arthritis (11.9%) |
|                                | <i>SSD</i>   | 9.9%                    | 2.27                                         | 1. Diabetes (27.9%) | 2. HTN (25.9%)       | 3. Eczema (11.2%)    |
|                                | <i>BD</i>    | 9.6%                    | 2.29                                         | 1. Diabetes (21.6%) | 2. HTN (18.6%)       | 3. Arthritis (15.1%) |
| <b>Arthritis</b>               | <i>Total</i> | 5.5%                    | 2.78                                         | 1. HTN (40.5%)      | 2. Diabetes (37.1%)  | 3. Asthma (21.5%)    |
|                                | <i>SSD</i>   | 5.4%                    | 2.78                                         | 1. HTN (43.4%)      | 2. Diabetes (39.9%)  | 3. Asthma (19.9%)    |
|                                | <i>BD</i>    | 5.6%                    | 2.80                                         | 1. HTN (32.1%)      | 2. Diabetes (29.4%)  | 3. Asthma (25.8%)    |
| <b>Epilepsy</b>                | <i>Total</i> | 4.6%                    | 2.40                                         | 1. HTN (25.5%)      | 2. Diabetes (24.8%)  | 3. Asthma (21.4%)    |
|                                | <i>SSD</i>   | 5.0%                    | 2.42                                         | 1. HTN (27.3%)      | 2. Diabetes (26.4%)  | 3. Asthma (21.8%)    |
|                                | <i>BD</i>    | 3.3%                    | 2.31                                         | 1. Asthma (19.7%)   | 2. Diabetes (17.7%)  | 2. HTN (17.7%)       |
| <b>CVA</b>                     | <i>Total</i> | 4.2%                    | 2.89                                         | 1. HTN (42.3%)      | 2. Diabetes (38.6%)  | 3. Asthma (15.4%)    |
|                                | <i>SSD</i>   | 4.4%                    | 2.83                                         | 1. HTN (42.8%)      | 2. Diabetes (38.9%)  | 3. Asthma (14.0%)    |
|                                | <i>BD</i>    | 3.5%                    | 3.09                                         | 1. HTN (40.6%)      | 2. Diabetes (37.4%)  | 3. Asthma (21.9%)    |
| <b>Eczema</b>                  | <i>Total</i> | 3.5%                    | 2.50                                         | 1. Asthma (32.5%)   | 2. Diabetes (26.9%)  | 3. HTN (23.1%)       |
|                                | <i>SSD</i>   | 3.7%                    | 2.45                                         | 1. Asthma (30.3%)   | 2. Diabetes (28.4%)  | 3. HTN (22.5%)       |
|                                | <i>BD</i>    | 3.1%                    | 2.64                                         | 1. Asthma (40.1%)   | 2. HTN (24.8%)       | 3. Diabetes (21.9%)  |
| <b>Migraine</b>                | <i>Total</i> | 3.2%                    | 2.20                                         | 1. Asthma (23.6%)   | 2. Diabetes (20.0%)  | 3. HTN (18.4%)       |
|                                | <i>SSD</i>   | 2.9%                    | 2.23                                         | 1. Diabetes (23.4%) | 2. Asthma (21.5%)    | 3. HTN (20.2%)       |
|                                | <i>BD</i>    | 4.3%                    | 2.15                                         | 1. Asthma (27.6%)   | 2. HTN (15.1%)       | 3. Arthritis (14.1%) |
| <b>Ischaemic heart disease</b> | <i>Total</i> | 3.2%                    | 3.27                                         | 1. HTN (49.0%)      | 2. Diabetes (43.3%)  | 3. Asthma (20.3%)    |
|                                | <i>SSD</i>   | 3.3%                    | 3.28                                         | 1. HTN (51.0%)      | 2. Diabetes (44.6%)  | 3. Asthma (20.2%)    |
|                                | <i>BD</i>    | 2.8%                    | 3.24                                         | 1. HTN (42.1%)      | 2. Diabetes (38.9%)  | 3. Arthritis (22.2%) |
| <b>COPD</b>                    | <i>Total</i> | 2.7%                    | 3.22                                         | 1. HTN (39.7%)      | 2. Diabetes (38.9%)  | 3. Asthma (35.7%)    |
|                                | <i>SSD</i>   | 2.6%                    | 3.20                                         | 1. Diabetes (41.2%) | 2. HTN (39.2%)       | 3. Asthma (35.7%)    |
|                                | <i>BD</i>    | 3.0%                    | 3.25                                         | 1. HTN (41.0%)      | 2. Asthma (35.8%)    | 3. Diabetes (32.8%)  |

*Note.* SSD: Schizophrenia Spectrum disorders. BD: Bipolar disorders. HTN: hypertension

Table 4. Associations between specific comorbidities, multimorbidity and HoNOS scores. Models were adjusted by age and sex (Model 1), and then additionally adjusted by IMD (Model 2a) or SMI diagnosis (Model 2b).

|                                 | HoNOS<br>Mean<br>(SD) | Unadjusted<br>B (95% CI)    | Model 1<br>B (95% CI)       | Model 2a<br>B (95% CI)      | Model 2b<br>B (95% CI)      |
|---------------------------------|-----------------------|-----------------------------|-----------------------------|-----------------------------|-----------------------------|
| <b>Physical comorbidities</b>   |                       |                             |                             |                             |                             |
| <b>Diabetes</b>                 | 10.93<br>(6.08)       | 0.652 (0.389 –<br>0.914)*** | 0.464 (0.198 –<br>0.730)*** | 0.485 (0.215 –<br>0.755)*** | 0.359 (0.094 –<br>0.625)**  |
| Ref: No diabetes                | 10.28<br>(6.05)       |                             |                             |                             |                             |
| <b>Hypertension</b>             | 10.99<br>(6.02)       | 0.713 (0.446 –<br>0.980)*** | 0.401 (0.123 –<br>0.680)**  | 0.368 (0.084 –<br>0.652)*   | 0.297 (0.019 –<br>0.576)*   |
| Ref: No hypertension            | 10.27<br>(6.06)       |                             |                             |                             |                             |
| <b>Asthma</b>                   | 11.05<br>(6.16)       | 0.734 (0.417 –<br>1.051)*** | 0.806 (0.490 –<br>1.121)*** | 0.770 (0.450 –<br>1.091)*** | 0.804 (0.489 –<br>1.118)*** |
| Ref: No asthma                  | 10.31<br>(6.04)       |                             |                             |                             |                             |
| <b>Arthritis</b>                | 12.01<br>(6.19)       | 1.728 (1.322 –<br>2.134)*** | 1.570 (1.156 –<br>1.984)*** | 1.558 (1.142 –<br>1.974)*** | 1.567 (1.155 –<br>1.980)*** |
| Ref: No arthritis               | 10.28<br>(6.03)       |                             |                             |                             |                             |
| <b>Epilepsy</b>                 | 11.40<br>(6.19)       | 1.055 (0.596 –<br>1.514)*** | 1.066 (0.609 –<br>1.523)*** | 1.089 (0.628 –<br>1.549)*** | 0.982 (0.527 –<br>1.437)*** |
| Ref: No epilepsy                | 10.35<br>(6.05)       |                             |                             |                             |                             |
| <b>CVA</b>                      | 11.81<br>(6.22)       | 1.487 (1.022 –<br>1.951)*** | 1.195 (0.728 –<br>1.662)*** | 1.180 (0.712 –<br>1.649)*** | 1.162 (0.697 –<br>1.627)*** |
| Ref: No CVA                     | 10.33<br>(6.04)       |                             |                             |                             |                             |
| <b>Eczema</b>                   | 11.12<br>(6.19)       | 0.753 (0.249 –<br>1.257)**  | 0.838 (0.336 –<br>1.340)*** | 0.728 (0.220 –<br>1.237)**  | 0.799 (0.299 –<br>1.299)**  |
| Ref: No eczema                  | 10.37<br>(6.05)       |                             |                             |                             |                             |
| <b>Migraine</b>                 | 10.33<br>(5.73)       | -0.078 (-0.600 –<br>0.445)  | 0.212 (-0.311 –<br>0.734)   | 0.227 (-0.300 –<br>0.754)   | 0.302 (-0.218 –<br>0.823)   |
| Ref: No migraine                | 10.40<br>(6.07)       |                             |                             |                             |                             |
| <b>Ischaemic heart disease</b>  | 11.64<br>(5.92)       | 1.294 (0.766 –<br>1.822)*** | 0.864 (0.332 –<br>1.395)*** | 0.853 (0.318 –<br>1.387)**  | 0.849 (0.320 –<br>1.379)**  |
| Ref: No ischaemic heart disease | 10.35<br>(6.06)       |                             |                             |                             |                             |
| <b>COPD</b>                     | 12.08<br>(5.78)       | 1.733 (1.158 –<br>2.309)*** | 1.326 (0.745 –<br>1.908)*** | 1.336 (0.750 –<br>1.923)*** | 1.397 (0.818 –<br>1.977)*** |
| Ref: No COPD                    | 10.34<br>(6.06)       |                             |                             |                             |                             |
| <b>Multimorbidity</b>           |                       |                             |                             |                             |                             |

|                                |              |                          |                          |                          |                          |
|--------------------------------|--------------|--------------------------|--------------------------|--------------------------|--------------------------|
| <b>Number of comorbidities</b> |              | 0.487 (0.406 – 0.567)*** | 0.423 (0.339 – 0.507)*** | 0.424 (0.339 – 0.510)*** | 0.404 (0.320 – 0.488)*** |
| <b>1 or more comorbidities</b> | 10.96 (6.08) | 1.053 (0.850 – 1.256)*** | 0.893 (0.685 – 1.101)*** | 0.895 (0.681 – 1.109)*** | 0.823 (0.615 – 1.031)*** |
| Ref: No comorbidities          | 9.90 (5.99)  |                          |                          |                          |                          |
| <b>2 or more comorbidities</b> | 11.34 (6.13) | 1.214 (0.973 – 1.455)*** | 1.021 (0.772 – 1.269)*** | 1.020 (0.768 – 1.272)*** | 0.968 (0.720 – 1.216)*** |
| Ref: Less than 1 comorbidities | 10.12 (6.01) |                          |                          |                          |                          |

Note: \*\*\* p < .001; \*\* p < .01; \* p < .05

For peer review only

1  
2  
3 Figure 1. Comparison of number of physical health comorbidities (a) and specific physical  
4 comorbidities (b) by SMI diagnosis.  
5  
6  
7

8 Figure 2. Prevalence of the most prevalent physical health conditions across ethnicities within  
9 the SMI cohort and the SSD and BD subgroups.  
10  
11  
12

13 Figure 3. Visualization of most prevalent comorbidities in individuals with SMI and comorbid  
14 diabetes.  
15  
16

17 Figure 4. Visualization of most prevalent comorbidities in individuals with SMI and comorbid  
18 hypertension.  
19  
20  
21

22 Figure 5. Visualization of most prevalent comorbidities in individuals with SMI and comorbid  
23 asthma.  
24  
25  
26  
27  
28  
29  
30  
31  
32  
33  
34  
35  
36  
37  
38  
39  
40  
41  
42  
43  
44  
45  
46  
47  
48  
49  
50  
51  
52  
53  
54  
55  
56  
57  
58  
59  
60

a



b



ew only



Figure 2. Prevalence of the most prevalent physical health conditions across ethnicities within the SMI cohort and the SSD and BD subgroups.

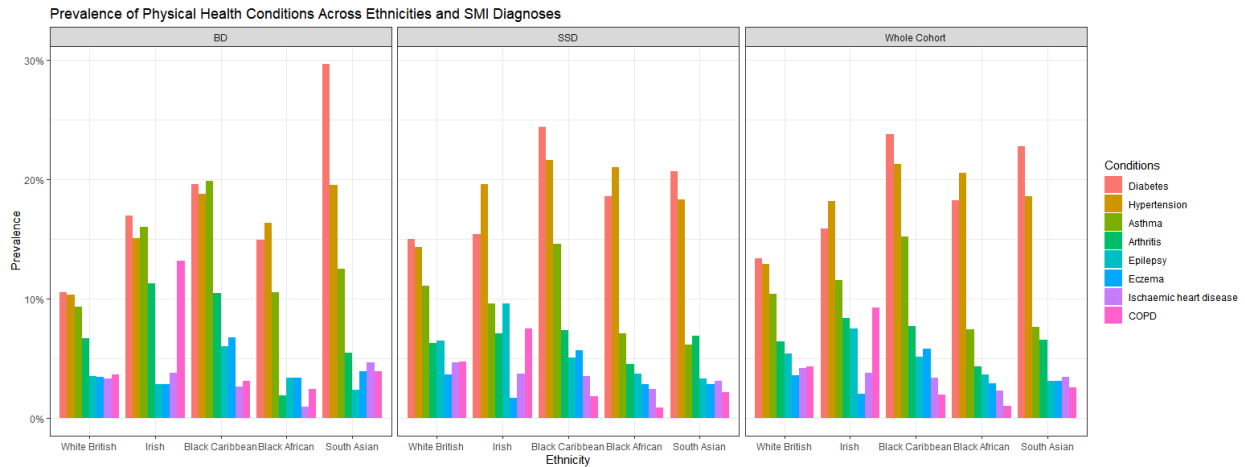

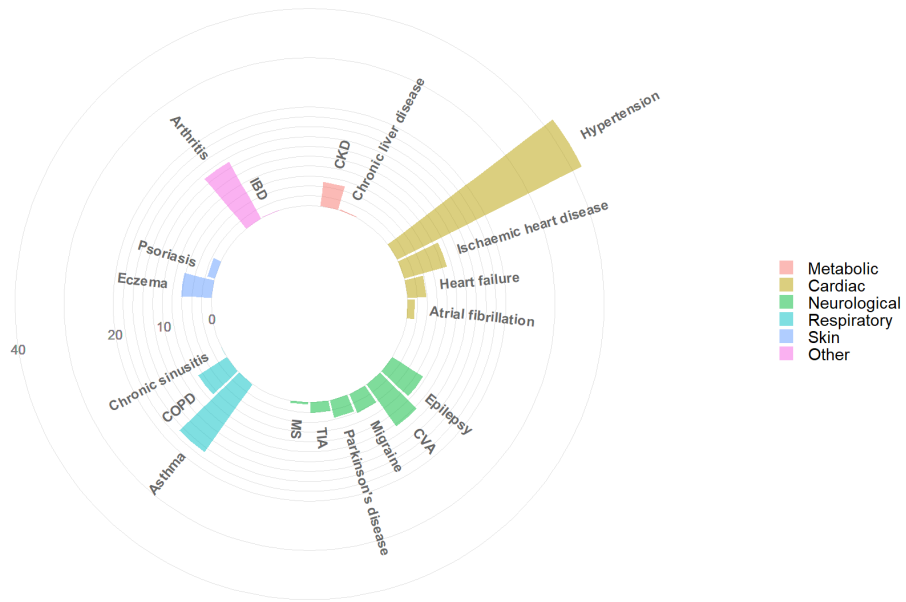

review only

1  
2  
3  
4  
5  
6  
7  
8  
9  
10  
11  
12  
13  
14  
15  
16  
17  
18  
19  
20  
21  
22  
23  
24  
25  
26  
27  
28  
29  
30  
31  
32  
33  
34  
35  
36  
37  
38  
39  
40  
41  
42  
43  
44  
45  
46  
47  
48  
49  
50  
51  
52  
53  
54  
55  
56  
57  
58  
59  
60

1  
2  
3  
4  
5  
6  
7  
8  
9  
10  
11  
12  
13  
14  
15  
16  
17  
18  
19  
20  
21  
22  
23  
24  
25  
26  
27  
28  
29  
30  
31  
32  
33  
34  
35  
36  
37  
38  
39  
40  
41  
42  
43  
44  
45  
46  
47  
48  
49  
50  
51  
52  
53  
54  
55  
56  
57  
58  
59  
60

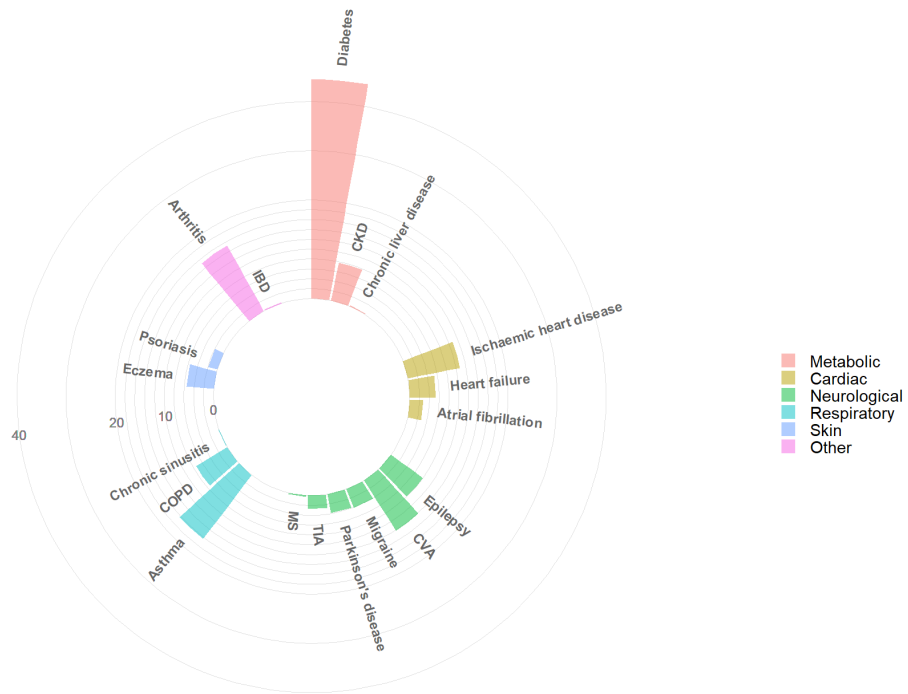

Review only

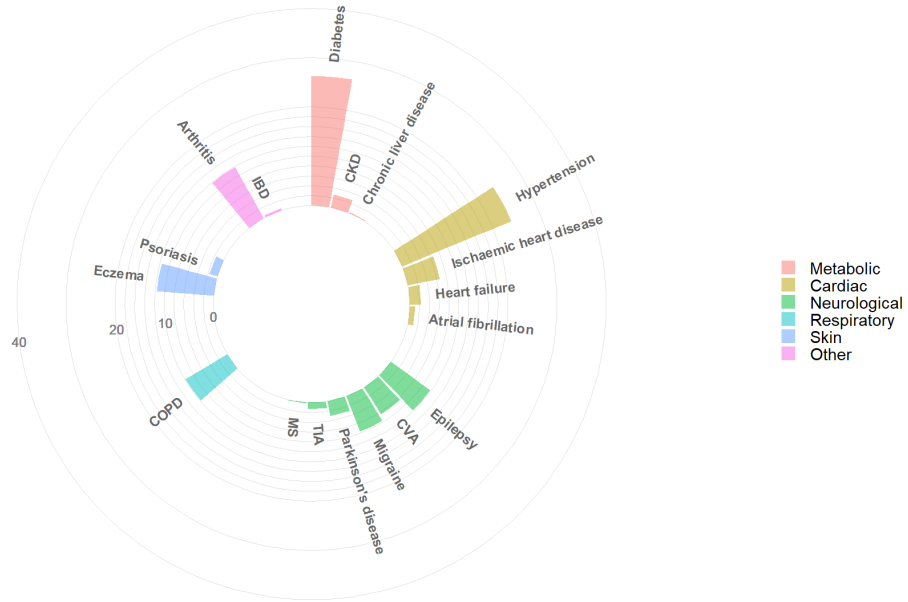

review only

## Supplemental Material

### Supplemental Tables

Supplemental Table 1. Meta-annotations performance results for Diagnosis and Status

Supplemental Table 2. Prevalence estimates and sex differences within the whole SMI cohort and SSD and BD subgroups.

Supplemental Table 3. Prevalence for each condition by age ranges at first SMI diagnosis for the whole SMI cohort and SSD and BD subgroups.

Supplemental Tables 4a, 4b and 4c. Prevalence for each condition across ethnicities for the whole SMI cohort and SSD and BD subgroups.

Supplemental Table 5. Social deprivation prevalence for each condition for the whole cohort and within SSD and BD.

Supplemental Table 6. Sociodemographic features of cohort in HoNOS subsample analysis

Supplemental Table 7. Associations between comorbidities and HoNOS scores in SSD.

Supplemental Table 8. Associations between comorbidities and HoNOS scores in BD.

### Supplemental Figures

Supplemental Figure 1. Distribution of all conditions in the SMI cohort by SMI group.

Supplemental Figure 2. Prevalence rates for age at SMI diagnoses per condition and comparison between individuals with BD and SSD.

**Appendix 1.** SNOMED Container and Concept Level Groupings for physical health conditions included in this study.

**Supplemental Tables***Supplemental Table 1. Meta-annotations performance results for Diagnosis and Status*

| <b>Meta-Annotation</b> | <b>Values</b>    | <b>F1<br/>(macro/weighted)</b> | <b>P (macro/weighted)</b> | <b>R (macro/weighted)</b> |
|------------------------|------------------|--------------------------------|---------------------------|---------------------------|
| Diagnosis              | Patient / Other  | 0.94 / 0.94                    | 0.95 / 0.95               | 0.92 / 0.94               |
| Status                 | Affirmed / Other | 0.89 / 0.98                    | 0.94 / 0.98               | 0.85 / 0.98               |

For peer review only

Supplemental Table 2. Prevalence estimates and sex differences within the whole SMI cohort and SSD and BD subgroups.

|                                          | Total Cohort   |                | SSD            |                | p-value | BD            |               | p-value |
|------------------------------------------|----------------|----------------|----------------|----------------|---------|---------------|---------------|---------|
|                                          | Female         | Male           | Female         | Male           |         | Female        | Male          |         |
| <b>Diabetes</b>                          | 1282<br>(15.8) | 1403<br>(15)   | 1021<br>(18.8) | 1187<br>(15.6) | <.001   | 261<br>(9.7)  | 216<br>(12.1) | .190    |
| <b>Hypertension ***</b>                  | 1325<br>(16.3) | 1212<br>(12.9) | 1060<br>(19.6) | 1010<br>(13.3) | <.001   | 265<br>(9.8)  | 202<br>(11.4) | 1.000   |
| <b>Asthma **</b>                         | 869<br>(10.7)  | 852<br>(9.1)   | 559<br>(10.3)  | 732<br>(9.6)   | 1.000   | 310<br>(11.5) | 120<br>(6.7)  | <.001   |
| <b>Arthritis ***</b>                     | 657<br>(8.1)   | 297<br>(3.2)   | 471<br>(8.7)   | 231<br>(3.0)   | <.001   | 186<br>(6.9)  | 66<br>(3.7)   | <.001   |
| <b>Epilepsy</b>                          | 349<br>(4.3)   | 450<br>(4.8)   | 253<br>(4.7)   | 399<br>(5.3)   | 1.000   | 96<br>(3.6)   | 51<br>(2.9)   | 1.000   |
| <b>Cerebrovascular diseases</b>          | 367<br>(4.5)   | 361<br>(3.9)   | 265<br>(4.9)   | 308<br>(4.1)   | .499    | 102<br>(3.8)  | 53<br>(3.0)   | 1.000   |
| <b>Eczema *</b>                          | 331<br>(4.1)   | 285<br>(3.0)   | 238<br>(4.4)   | 241<br>(3.2)   | <.01    | 93<br>(3.4)   | 44<br>(2.5)   | 1.000   |
| <b>Migraine ***</b>                      | 369<br>(4.5)   | 194<br>(2.1)   | 217<br>(4.0)   | 155<br>(2.0)   | <.001   | 152<br>(5.6)  | 39<br>(2.2)   | <.001   |
| <b>Ischaemic heart disease</b>           | 249<br>(3.1)   | 312<br>(3.3)   | 196<br>(3.6)   | 239<br>(3.1)   | 1.000   | 53<br>(2.0)   | 73<br>(4.2)   | <.001   |
| <b>Chronic Obstructive Lung diseases</b> | 237<br>(2.9)   | 239<br>(2.5)   | 153<br>(2.8)   | 189<br>(2.5)   | 1.000   | 84<br>(3.1)   | 50<br>(2.8)   | 1.000   |
| <b>Chronic Kidney disease</b>            | 158<br>(1.9)   | 121<br>(1.3)   | 104<br>(1.9)   | 75<br>(1.0)    | <.001   | 54<br>(2.0)   | 46<br>(2.6)   | 1.000   |
| <b>Parkinson disease</b>                 | 113<br>(1.4)   | 153<br>(1.6)   | 81<br>(1.5)    | 120<br>(1.6)   | 1.000   | 32<br>(1.2)   | 33<br>(1.9)   | 1.000   |
| <b>Heart failure</b>                     | 123<br>(1.5)   | 99<br>(1.0)    | 105<br>(1.9)   | 82<br>(1.1)    | .001    | 18<br>(0.7)   | 17<br>(1.0)   | 1.000   |
| <b>Psoriasis</b>                         | 76<br>(0.9)    | 103<br>(1.1)   | 45<br>(0.8)    | 84<br>(1.1)    | 1.000   | 31<br>(1.1)   | 19<br>(1.1)   | 1.000   |
| <b>Atrial fibrillation</b>               | 65<br>(0.8)    | 68<br>(0.7)    | 50<br>(0.9)    | 50<br>(0.7)    | 1.000   | 15<br>(0.6)   | 18<br>(1.0)   | 1.000   |
| <b>Transient Ischaemic Attack</b>        | 79<br>(1.0)    | 51<br>(0.5)    | 53<br>(1.0)    | 38<br>(0.5)    | .037    | 26<br>(1.0)   | 13<br>(0.7)   | 1.000   |
| <b>Inflammatory Bowel diseases</b>       | 26<br>(0.3)    | 14<br>(0.1)    | 18<br>(0.3)    | 7<br>(0.1)     | .080    | 8<br>(0.3)    | 7<br>(0.4)    | 1.000   |

|                              |             |             |            |             |   |            |            |   |
|------------------------------|-------------|-------------|------------|-------------|---|------------|------------|---|
| <b>Multiple Sclerosis</b>    | 17<br>(0.2) | 15<br>(0.2) | 9<br>(0.2) | 10<br>(0.1) | - | 8<br>(0.3) | 5<br>(0.3) | - |
| <b>Chronic liver disease</b> | 10<br>(0.1) | 12<br>(0.1) | 9          | 11<br>(0.1) | - | 1<br>(0.0) | 1<br>(0.1) | - |
| <b>Chronic Sinusitis</b>     | 3<br>(0.0)  | 3<br>(0.0)  | 3          | 3<br>(0.0)  | - | 0<br>(0.0) | 0<br>(0.0) | - |

Note. \*\*\*  $p < .001$ ; \*\*  $p < .01$ ; \*  $p < .05$  for comparisons between male and female groups in the whole SMI cohort

For peer review only



1  
2  
3  
4  
5  
6  
7  
8  
9  
10  
11  
12  
13  
14  
15  
16  
17  
18  
19  
20  
21  
22  
23  
24  
25  
26  
27  
28  
29  
30  
31  
32  
33  
34  
35  
36  
37  
38  
39  
40  
41  
42  
43  
44  
45  
46  
47  
48  
49  
50  
51  
52  
53  
54  
55  
56  
57  
58  
59  
60

*Supplemental Table 3. Prevalence for each condition for the whole cohort and diagnoses subgroups and across age ranges at first SMI diagnosis.*

For peer review only

|                               | Total  |        |        |        |        | SSD    |        |        |        |        | BD    |        |        |        |        |        |       |
|-------------------------------|--------|--------|--------|--------|--------|--------|--------|--------|--------|--------|-------|--------|--------|--------|--------|--------|-------|
|                               | 15-34  | 35-44  | 45-54  | 55-64  | 65+    | 15-34  | 35-44  | 45-54  | 55-64  | 65+    | 15-34 | 35-44  | 45-54  | 55-64  | 65+    |        |       |
| <b>Total</b>                  | 7497   | 3736   | 2783   | 1525   | 1959   | 5607   | 2792   | 2057   | 1067   | 1496   |       | 1890   | 944    | 726    | 458    | 463    |       |
| <b>Diabetes***</b>            | 697    | 559    | 531    | 371    | 528    | 591    | 479    | 439    | 284    | 415    | p <   | 106    | 80     | 92     | 87     | 113    | p <   |
|                               | (9.3)  | (15.0) | (19.1) | (24.3) | (27.0) | (10.5) | (17.2) | (21.3) | (26.6) | (27.7) | 0.001 | (5.6)  | (8.5)  | (12.7) | (19.0) | (24.4) | 0.001 |
| <b>Hypertension***</b>        | 472    | 426    | 514    | 416    | 709    | 412    | 372    | 411    | 313    | 562    | p <   | 60     | 54     | 103    | 103    | 147    | p <   |
|                               | (6.3)  | (11.4) | (18.5) | (27.3) | (36.2) | (7.3)  | (13.3) | (20.0) | (29.3) | (37.6) | 0.001 | (3.2)  | (5.7)  | (14.2) | (22.5) | (31.7) | 0.001 |
| <b>Asthma***</b>              | 820    | 347    | 297    | 126    | 132    | 635    | 248    | 218    | 89     | 101    | p <   | 185    | 99     | 79     | 37     | 31     | p =   |
|                               | (10.9) | (9.3)  | (10.7) | (8.3)  | (6.7)  | (11.3) | (8.9)  | (10.6) | (8.3)  | (6.8)  | 0.001 | (9.8)  | (10.5) | (10.9) | (8.1)  | (6.7)  | 1.000 |
| <b>Arthritis***</b>           | 125    | 154    | 229    | 167    | 279    | 93     | 120    | 159    | 118    | 212    | p <   | 32     | 34     | 70     | 49     | 67     | p <   |
|                               | (1.7)  | (4.1)  | (8.2)  | (11.0) | (14.2) | (1.7)  | (4.3)  | (7.7)  | (11.1) | (14.2) | 0.001 | (1.7)  | (3.6)  | (9.6)  | (10.7) | (14.5) | 0.001 |
| <b>Epilepsy</b>               | 339    | 188    | 133    | 67     | 72     | 276    | 154    | 112    | 55     | 55     | 1.000 | 63     | 34     | 21     | 12     | 17     | 1.000 |
|                               | (4.5)  | (5.0)  | (4.8)  | (4.4)  | (3.7)  | (4.9)  | (5.5)  | (5.4)  | (5.2)  | (3.7)  |       | (3.3)  | (3.6)  | (2.9)  | (2.6)  | (3.7)  |       |
| <b>CVA***</b>                 | 166    | 112    | 122    | 114    | 214    | 143    | 87     | 95     | 84     | 164    | p <   | 23     | 25     | 27     | 30     | 50     | p <   |
|                               | (2.2)  | (3.0)  | (4.4)  | (7.5)  | (10.9) | (2.6)  | (3.1)  | (4.6)  | (7.9)  | (11.0) | 0.001 | (1.2)  | (2.6)  | (3.7)  | (6.6)  | (10.8) | 0.001 |
| <b>Eczema</b>                 | 310    | 115    | 79     | 50     | 62     | 244    | 88     | 58     | 37     | 52     | 0.120 | 66     | 27     | 21     | 13     | 10     | 1.000 |
|                               | (4.1)  | (3.1)  | (2.8)  | (3.3)  | (3.2)  | (4.4)  | (3.2)  | (2.8)  | (3.5)  | (3.5)  |       | (3.5)  | (2.9)  | (2.9)  | (2.8)  | (2.2)  |       |
| <b>Migraine***</b>            | 300    | 122    | 87     | 32     | 23     | 207    | 73     | 53     | 24     | 15     | p <   | 93     | 49     | 34     | 8      | 8      | 0.011 |
|                               | (4.0)  | (3.3)  | (3.1)  | (2.1)  | (1.2)  | (3.7)  | (2.6)  | (2.6)  | (2.2)  | (1.0)  | 0.001 | (4.9)  | (5.2)  | (4.7)  | (1.7)  | (1.7)  |       |
| <b>Isc heart disease***</b>   | 111    | 73     | 105    | 95     | 177    | 96     | 60     | 80     | 65     | 134    | p <   | 15     | 13     | 25     | 30     | 43     | p <   |
|                               | (1.5)  | (2.0)  | (3.8)  | (6.2)  | (9.0)  | (1.7)  | (2.1)  | (3.9)  | (6.1)  | (9.0)  | 0.001 | (0.8)  | (1.4)  | (3.4)  | (6.6)  | (9.3)  | 0.001 |
| <b>COPD***</b>                | 39     | 58     | 119    | 115    | 145    | 29     | 40     | 87     | 82     | 104    | p <   | 10     | 18     | 32     | 33     | 41     | p <   |
|                               | (0.5)  | (1.6)  | (4.3)  | (7.5)  | (7.4)  | (0.5)  | (1.4)  | (4.2)  | (7.7)  | (7.0)  | 0.001 | (0.5)  | (1.9)  | (4.4)  | (7.2)  | (8.9)  | 0.001 |
| <b>CKD***</b>                 | 12     | 18     | 41     | 55     | 153    | 9      | 14     | 28     | 33     | 95     | p <   | 3      | 4      | 13     | 22     | 58     | -     |
|                               | (0.2)  | (0.5)  | (1.5)  | (3.6)  | (7.8)  | (0.2)  | (0.5)  | (1.4)  | (3.1)  | (6.4)  | 0.001 | (0.2)  | (0.4)  | (1.8)  | (4.8)  | (12.5) |       |
| <b>PD***</b>                  | 70     | 33     | 37     | 41     | 85     | 57     | 22     | 27     | 32     | 63     | p <   | 13     | 11     | 10     | 9      | 22     | p <   |
|                               | (0.9)  | (0.9)  | (1.3)  | (2.7)  | (4.3)  | (1.0)  | (0.8)  | (1.3)  | (3.0)  | (4.2)  | 0.001 | (0.7)  | (1.2)  | (1.4)  | (2.0)  | (4.8)  | 0.001 |
| <b>HF***</b>                  | 18     | 30     | 42     | 40     | 92     | 17     | 30     | 38     | 29     | 73     | p <   | 1      | 0      | 4      | 11     | 19     | -     |
|                               | (0.2)  | (0.8)  | (1.5)  | (2.6)  | (4.7)  | (0.3)  | (1.1)  | (1.8)  | (2.7)  | (4.9)  | 0.001 | (0.1)  | (0.0)  | (0.6)  | (2.4)  | (4.1)  |       |
| <b>Psoriasis</b>              | 67     | 33     | 37     | 17     | 25     | 54     | 25     | 25     | 9      | 16     | 1.000 | 13     | 8      | 12     | 8      | 9      | 0.450 |
|                               | (0.9)  | (0.9)  | (1.3)  | (1.1)  | (1.3)  | (1.0)  | (0.9)  | (1.2)  | (0.8)  | (1.1)  |       | (0.7)  | (0.8)  | (1.7)  | (1.7)  | (1.9)  |       |
| <b>Atrial fibrillation***</b> | 14     | 7      | 12     | 19     | 81     | 11     | 6      | 8      | 12     | 63     | p <   | 3      | 1      | 4      | 7      | 18     | -     |
|                               | (0.2)  | (0.2)  | (0.4)  | (1.2)  | (4.1)  | (0.2)  | (0.2)  | (0.4)  | (0.1)  | (4.2)  | 0.001 | (0.20) | (0.1)  | (0.6)  | (1.5)  | (3.9)  |       |
| <b>TIA***</b>                 | 20     | 18     | 19     | 23     | 50     | 15     | 15     | 13     | 14     | 34     | p <   | 5      | 3      | 6      | 9      | 16     | -     |
|                               | (0.3)  | (0.5)  | (0.7)  | (1.5)  | (2.6)  | (0.3)  | (0.5)  | (0.6)  | (1.3)  | (2.3)  | 0.001 | (0.3)  | (0.3)  | (0.8)  | (2.0)  | (3.5)  |       |
| <b>IBD</b>                    | 9      | 8      | 12     | 6      | 5      | 4      | 6      | 7      | 3      | 5      | -     | 5      | 2      | 5      | 3      | 0      | -     |
|                               | (0.1)  | (0.2)  | (0.4)  | (0.4)  | (0.3)  | (0.1)  | (0.2)  | (0.3)  | (0.3)  | (0.3)  |       | (0.3)  | (0.2)  | (0.7)  | (0.7)  | (0.0)  |       |
| <b>MS</b>                     | 6      | 8      | 11     | 5      | 2      | 4      | 4      | 8      | 3      | 0      | -     | 2      | 4      | 3      | 2      | 2      | -     |
|                               | (0.1)  | (0.2)  | (0.4)  | (0.3)  | (0.1)  | (0.1)  | (0.1)  | (0.4)  | (0.3)  | (0.0)  |       | (0.1)  | (0.4)  | (0.4)  | (0.4)  | (0.4)  |       |

1  
2  
3  
4  
5  
6  
7  
8  
9  
10  
11  
12  
13  
14  
15  
16  
17  
18  
19  
20  
21  
22  
23  
24  
25  
26  
27  
28  
29  
30  
31  
32  
33  
34  
35  
36  
37  
38  
39  
40  
41  
42  
43  
44  
45  
46  
47

|                              |            |            |            |            |            |            |            |            |            |            |   |            |            |            |            |            |   |
|------------------------------|------------|------------|------------|------------|------------|------------|------------|------------|------------|------------|---|------------|------------|------------|------------|------------|---|
| <b>Chronic liver disease</b> | 5<br>(0.1) | 7<br>(0.2) | 6<br>(0.2) | 3<br>(0.2) | 1<br>(0.1) | 5<br>(0.1) | 7<br>(0.3) | 5<br>(0.2) | 2<br>(0.2) | 1<br>(0.1) | - | 0<br>(0.0) | 0<br>(0.0) | 1<br>(0.1) | 1<br>(0.2) | 0<br>(0.0) | - |
| <b>Chronic sinusitis</b>     | 5<br>(0.1) | 0<br>(0.0) | 1<br>(0.0) | 0<br>(0.0) | 0<br>(0.0) | 5<br>(0.1) | 0<br>(0.0) | 1<br>(0.0) | 0<br>(0.0) | 0<br>(0.0) | - | 0<br>(0.0) | 0<br>(0.0) | 0<br>(0.0) | 0<br>(0.0) | 0<br>(0.0) | - |

Note: \*\*\* p < .001; \*\* p < .01; \* p < .05 for comparisons between age groups within the SMI cohort.

For peer review only

Supplemental Tables 4. Prevalence for each condition for the whole cohort and diagnoses subgroups and across ethnicities

Table 4a. Prevalence for each condition for the whole cohort and ethnicity.

|                                 | White<br>British<br>n=6243<br>(35.7%) | Irish<br>n=346<br>(2.0%) | Black<br>Caribbean<br>n=3182<br>(18.2%) | Black<br>African<br>n=2094<br>(12.0%) | South<br>Asian<br>n=549<br>(3.1%) | Other <sup>§</sup><br>n=2846<br>(22.0%) | Unknown <sup>§</sup><br>n=1240<br>(7.1%) | Statistics                         |
|---------------------------------|---------------------------------------|--------------------------|-----------------------------------------|---------------------------------------|-----------------------------------|-----------------------------------------|------------------------------------------|------------------------------------|
| <b>Diabetes</b>                 | 837 (13.4)                            | 55 (15.9)                | 757 (23.8)                              | 382 (18.2)                            | 125 (22.8)                        | 461 (12.0)                              | 69 (5.6)                                 | $\chi^2$ (4) = 172.49; $p < 0.001$ |
| <b>Hypertension</b>             | 804 (12.9)                            | 63 (18.2)                | 678 (21.3)                              | 430 (20.5)                            | 102 (18.6)                        | 400 (10.4)                              | 60 (4.8)                                 | $\chi^2$ (4) = 137.98; $p < 0.001$ |
| <b>Asthma</b>                   | 651 (10.4)                            | 40 (11.6)                | 484 (15.2)                              | 156 (7.4)                             | 42 (7.7)                          | 296 (7.7)                               | 53 (4.3)                                 | $\chi^2$ (4) = 92.58; $p < 0.001$  |
| <b>Arthritis</b>                | 402 (6.4)                             | 29 (8.4)                 | 246 (7.7)                               | 90 (4.3)                              | 36 (6.6)                          | 139 (3.6)                               | 12 (1.0)                                 | $\chi^2$ (4) = 26.80; $p < 0.001$  |
| <b>Epilepsy</b>                 | 339 (5.4)                             | 26 (7.5)                 | 164 (5.2)                               | 77 (3.7)                              | 17 (3.1)                          | 147 (3.8)                               | 29 (2.4)                                 | $\chi^2$ (4) = 19.02; $p = 0.010$  |
| <b>Cerebrovascular accident</b> | 274 (4.4)                             | 20 (5.8)                 | 184 (5.8)                               | 92 (4.4)                              | 25 (4.6)                          | 116 (3.0)                               | 17 (1.4)                                 | $\chi^2$ (4) = 10.60; $p = 0.408$  |
| <b>Eczema</b>                   | 222 (3.6)                             | 7 (2.0)                  | 185 (5.8)                               | 61 (2.9)                              | 17 (3.1)                          | 108 (2.8)                               | 16 (1.3)                                 | $\chi^2$ (4) = 41.93; $p < 0.001$  |
| <b>Migraine</b>                 | 235 (3.8)                             | 12 (3.5)                 | 129 (4.1)                               | 61 (2.9)                              | 17 (3.1)                          | 98 (2.5)                                | 12 (1.0)                                 | $\chi^2$ (4) = 5.44; $p > .99$     |
| <b>Ischemic heart disease</b>   | 261 (4.2)                             | 13 (3.8)                 | 108 (3.4)                               | 48 (2.3)                              | 19 (3.5)                          | 99 (2.6)                                | 13 (1.0)                                 | $\chi^2$ (4) = 16.74; $p = 0.028$  |
| <b>COPD</b>                     | 271 (4.3)                             | 32 (9.2)                 | 63 (2.0)                                | 21 (1.0)                              | 14 (2.6)                          | 60 (1.6)                                | 15 (1.2)                                 | $\chi^2$ (4) = 114.69; $p < 0.001$ |
| <b>CKD</b>                      | 125 (2.0)                             | 9 (2.6)                  | 56 (1.8)                                | 32 (1.5)                              | 13 (2.4)                          | 37 (1.0)                                | 7 (0.6)                                  | $\chi^2$ (4) = 3.81; $p > .99$     |
| <b>Parkinson's disease</b>      | 117 (1.9)                             | 6 (1.7)                  | 56 (1.8)                                | 25 (1.2)                              | 11 (2.0)                          | 45 (1.2)                                | 6 (0.5)                                  | $\chi^2$ (4) = 4.56; $p > .99$     |
| <b>Heart failure</b>            | 88 (1.4)                              | 8 (2.3)                  | 55 (1.7)                                | 29 (1.4)                              | 8 (1.5)                           | 31 (0.8)                                | 3 (0.2)                                  | $\chi^2$ (4) = 3.16; $p > .99$     |
| <b>Psoriasis</b>                | 103 (1.6)                             | 4 (1.2)                  | 12 (0.4)                                | 6 (0.3)                               | 5 (0.9)                           | 44 (1.1)                                | 5 (0.4)                                  | *                                  |
| <b>Atrial fibrillation</b>      | 69 (1.1)                              | 9 (2.6)                  | 23 (0.7)                                | 11 (0.5)                              | 2 (0.4)                           | 15 (0.4)                                | 4 (0.3)                                  | *                                  |

|                              |          |         |          |          |         |          |         |   |
|------------------------------|----------|---------|----------|----------|---------|----------|---------|---|
| <b>TIA</b>                   | 58 (0.9) | 7 (2.0) | 24 (0.8) | 15 (0.7) | 7 (1.3) | 13 (0.3) | 6 (0.5) | * |
| <b>IBD</b>                   | 24 (0.4) | 1 (0.3) | 2 (0.1)  | 2 (0.1)  | 1 (0.2) | 9 (0.2)  | 1 (0.1) | * |
| <b>Multiple sclerosis</b>    | 21 (0.3) | 1 (0.3) | 3 (0.1)  | 1 (0.0)  | 0 (0.0) | 4 (0.1)  | 2 (0.2) | * |
| <b>Chronic liver disease</b> | 9 (0.1)  | 1 (0.3) | 1 (0.0)  | 6 (0.3)  | 0 (0.0) | 5 (0.1)  | 0 (0.0) | * |
| <b>Chronic sinusitis</b>     | 1 (0.0)  | 0 (0.0) | 3 (0.1)  | 1 (0.0)  | 0 (0.0) | 1 (0.0)  | 0 (0.0) | * |

§Categories were dropped for statistical analysis. \* $\chi^2$  test not performed due to small population sizes

Table 4b. Prevalence for each condition across ethnicities in SSD.

|                                     | <b>White<br/>British<br/>n=4008<br/>(30.8%)</b> | <b>Irish<br/>n=240<br/>(1.8%)</b> | <b>Black<br/>Caribbean<br/>n=2799<br/>(21.5%)</b> | <b>Black<br/>African<br/>n=1886<br/>(14.5%)</b> | <b>South<br/>Asian<br/>n=421<br/>(3.2%)</b> | <b>Other<sup>§</sup><br/>n=2822<br/>(21.7%)</b> | <b>Unknown<sup>§</sup><br/>n=843<br/>(6.5%)</b> | <b>Statistics</b>                     |
|-------------------------------------|-------------------------------------------------|-----------------------------------|---------------------------------------------------|-------------------------------------------------|---------------------------------------------|-------------------------------------------------|-------------------------------------------------|---------------------------------------|
| <b>Diabetes</b>                     | 602 (15.0)                                      | 37 (15.4)                         | 682 (24.4)                                        | 351 (18.6)                                      | 87 (20.7)                                   | 390 (13.8)                                      | 59 (7.0)                                        | $\chi^2$ (4) =<br>97.10; $p < 0.001$  |
| <b>Hypertension</b>                 | 573 (14.3)                                      | 47 (19.6)                         | 606 (21.7)                                        | 396 (21.0)                                      | 77 (18.3)                                   | 322 (11.4)                                      | 49 (5.8)                                        | $\chi^2$ (4) =<br>73.74; $p < 0.001$  |
| <b>Asthma</b>                       | 443 (11.1)                                      | 23 (9.6)                          | 408 (14.6)                                        | 134 (7.1)                                       | 26 (6.2)                                    | 217 (7.7)                                       | 40 (4.7)                                        | $\chi^2$ (4) =<br>75.96; $p < 0.001$  |
| <b>Arthritis</b>                    | 252 (6.3)                                       | 17 (7.1)                          | 206 (7.4)                                         | 86 (4.6)                                        | 29 (6.9)                                    | 103 (3.6)                                       | 9 (1.1)                                         | $\chi^2$ (4) =<br>15.48; $p = 0.038$  |
| <b>Epilepsy</b>                     | 261 (6.5)                                       | 23 (9.6)                          | 141 (5.0)                                         | 70 (3.7)                                        | 14 (3.3)                                    | 117 (4.1)                                       | 26 (3.1)                                        | $\chi^2$ (4) =<br>32.45; $p < 0.001$  |
| <b>Cerebrovascular<br/>accident</b> | 188 (4.7)                                       | 15 (6.2)                          | 159 (5.7)                                         | 82 (4.3)                                        | 18 (4.3)                                    | 96 (3.4)                                        | 15 (1.8)                                        | $\chi^2$ (4) =<br>6.48; $p > 0.99$    |
| <b>Eczema</b>                       | 145 (3.6)                                       | 4 (1.7)                           | 159 (5.7)                                         | 54 (2.9)                                        | 12 (2.9)                                    | 93 (3.3)                                        | 12 (1.4)                                        | $\chi^2$ (4) =<br>33.32; $p < 0.001$  |
| <b>Migraine</b>                     | 126 (3.1)                                       | 10 (4.2)                          | 110 (3.9)                                         | 48 (2.5)                                        | 12 (2.9)                                    | 59 (2.1)                                        | 7 (0.8)                                         | $\chi^2$ (4) =<br>8.03; $p = 0.904$   |
| <b>Ischemic heart disease</b>       | 187 (4.7)                                       | 9 (3.8)                           | 98 (3.5)                                          | 46 (2.4)                                        | 13 (3.1)                                    | 74 (2.6)                                        | 8 (0.9)                                         | $\chi^2$ (4) =<br>19.15; $p = 0.007$  |
| <b>COPD</b>                         | 190 (4.7)                                       | 18 (7.5)                          | 51 (1.8)                                          | 16 (0.8)                                        | 9 (2.1)                                     | 44 (1.6)                                        | 14 (1.7)                                        | $\chi^2$ (4) =<br>101.62; $p < 0.001$ |
| <b>CKD</b>                          | 64 (1.6)                                        | 5 (2.1)                           | 45 (1.6)                                          | 26 (1.4)                                        | 10 (2.4)                                    | 24 (0.9)                                        | 5 (0.6)                                         | *                                     |
| <b>Parkinson's disease</b>          | 79 (2.0)                                        | 4 (1.7)                           | 49 (1.8)                                          | 21 (1.1)                                        | 6 (1.4)                                     | 36 (1.3)                                        | 6 (0.7)                                         | *                                     |

|                              |          |         |          |          |         |          |         |   |
|------------------------------|----------|---------|----------|----------|---------|----------|---------|---|
| <b>Heart failure</b>         | 65 (1.6) | 8 (3.3) | 50 (1.8) | 28 (1.5) | 7 (1.7) | 26 (0.9) | 3 (0.4) | * |
| <b>Psoriasis</b>             | 66 (1.6) | 2 (0.8) | 9 (0.3)  | 6 (0.3)  | 4 (1.0) | 37 (1.3) | 5 (0.6) | * |
| <b>Atrial fibrillation</b>   | 46 (1.1) | 7 (2.9) | 22 (0.8) | 11 (0.6) | 1 (0.2) | 10 (0.4) | 3 (0.4) | * |
| <b>TIA</b>                   | 34 (0.8) | 5 (2.1) | 21 (0.8) | 13 (0.7) | 6 (1.4) | 8 (0.3)  | 4 (0.5) | * |
| <b>IBD</b>                   | 12 (0.3) | 1 (0.4) | 2 (0.1)  | 2 (0.1)  | 1 (0.2) | 6 (0.2)  | 1 (0.1) | * |
| <b>Multiple sclerosis</b>    | 12 (0.3) | 1 (0.4) | 3 (0.1)  | 0 (0.0)  | 0 (0.0) | 2 (0.1)  | 1 (0.1) | * |
| <b>Chronic liver disease</b> | 7 (0.2)  | 1 (0.4) | 1 (0.0)  | 6 (0.3)  | 0 (0.0) | 5 (0.2)  | 0 (0.0) | * |
| <b>Chronic sinusitis</b>     | 1 (0.0)  | 0 (0.0) | 3 (0.1)  | 1 (0.1)  | 0 (0.0) | 1 (0.0)  | 0 (0.0) | * |

§Categories were dropped for statistical analysis. \* $\chi^2$  test not performed due to small population sizes

Table 4c. Prevalence for each condition across ethnicities in BD.

|                                 | <b>White<br/>British<br/>n=2235<br/>(49.9%)</b> | <b>Irish<br/>n=106<br/>(2.4%)</b> | <b>Black<br/>Caribbean<br/>n=383<br/>(8.5%)</b> | <b>Black<br/>African<br/>n=208<br/>(4.6%)</b> | <b>South<br/>Asian<br/>n=128<br/>(2.9%)</b> | <b>Other<sup>§</sup><br/>n=1024<br/>(22.9%)</b> | <b>Unknown<sup>§</sup><br/>n=397<br/>(8.9%)</b> | <b>Statistics</b>                    |
|---------------------------------|-------------------------------------------------|-----------------------------------|-------------------------------------------------|-----------------------------------------------|---------------------------------------------|-------------------------------------------------|-------------------------------------------------|--------------------------------------|
| <b>Diabetes</b>                 | 235 (10.5)                                      | 18 (17.0)                         | 75 (19.6)                                       | 31 (14.9)                                     | 38 (29.7)                                   | 71 (6.9)                                        | 10 (2.5)                                        | $\chi^2$ (4) =<br>60.65; $p < 0.001$ |
| <b>Hypertension</b>             | 231 (10.3)                                      | 16 (15.1)                         | 72 (18.8)                                       | 34 (16.3)                                     | 25 (19.5)                                   | 78 (7.6)                                        | 11 (2.8)                                        | $\chi^2$ (4) =<br>32.99; $p < 0.001$ |
| <b>Asthma</b>                   | 208 (9.3)                                       | 17 (16.0)                         | 76 (19.8)                                       | 22 (10.6)                                     | 16 (12.5)                                   | 79 (7.7)                                        | 13 (3.3)                                        | $\chi^2$ (4) =<br>39.95; $p < 0.001$ |
| <b>Arthritis</b>                | 150 (6.7)                                       | 12 (11.3)                         | 40 (10.4)                                       | 4 (1.9)                                       | 7 (5.5)                                     | 36 (3.5)                                        | 3 (0.8)                                         | $\chi^2$ (4) =<br>19.09; $p = 0.004$ |
| <b>Epilepsy</b>                 | 78 (3.5)                                        | 3 (2.8)                           | 23 (6.0)                                        | 7 (3.4)                                       | 3 (2.3)                                     | 30 (2.9)                                        | 3 (0.8)                                         | *                                    |
| <b>Cerebrovascular accident</b> | 86 (3.8)                                        | 5 (4.7)                           | 25 (6.5)                                        | 10 (4.8)                                      | 7 (5.5)                                     | 20 (2.0)                                        | 2 (0.5)                                         | *                                    |
| <b>Eczema</b>                   | 77 (3.4)                                        | 3 (2.8)                           | 26 (6.8)                                        | 7 (3.4)                                       | 5 (3.9)                                     | 15 (1.5)                                        | 4 (1.0)                                         | *                                    |
| <b>Migraine</b>                 | 109 (4.9)                                       | 2 (1.9)                           | 19 (5.0)                                        | 13 (6.2)                                      | 5 (3.9)                                     | 39 (3.8)                                        | 5 (1.3)                                         | $\chi^2$ (4) =<br>3.17; $p > 0.99$   |
| <b>Ischemic heart disease</b>   | 74 (3.3)                                        | 4 (3.8)                           | 10 (2.6)                                        | 2 (1.0)                                       | 6 (4.7)                                     | 25 (2.4)                                        | 5 (1.3)                                         | *                                    |

|                              |          |           |          |         |         |          |         |   |
|------------------------------|----------|-----------|----------|---------|---------|----------|---------|---|
| <b>COPD</b>                  | 81 (3.6) | 14 (13.2) | 12 (3.1) | 5 (2.4) | 5 (3.9) | 16 (1.6) | 1 (0.3) | * |
| <b>CKD</b>                   | 61 (2.7) | 4 (3.8)   | 11 (2.9) | 6 (2.9) | 3 (2.3) | 13 (1.3) | 2 (0.5) | * |
| <b>Parkinson's disease</b>   | 38 (1.7) | 2 (1.9)   | 7 (1.8)  | 4 (1.9) | 5 (3.9) | 9 (0.9)  | 0 (0.0) | * |
| <b>Heart failure</b>         | 23 (1.0) | 0 (0.0)   | 5 (1.3)  | 1 (0.5) | 1 (0.8) | 5 (0.5)  | 0 (0.0) | * |
| <b>Psoriasis</b>             | 37 (1.7) | 2 (1.9)   | 3 (0.8)  | 0 (0.0) | 1 (0.8) | 7 (0.7)  | 0 (0.0) | * |
| <b>Atrial fibrillation</b>   | 23 (1.0) | 2 (1.9)   | 1 (0.3)  | 0 (0.0) | 1 (0.8) | 5 (0.5)  | 1 (0.3) | * |
| <b>TIA</b>                   | 24 (1.1) | 2 (1.9)   | 3 (0.8)  | 2 (1.0) | 1 (0.8) | 5 (0.5)  | 2 (0.5) | * |
| <b>IBD</b>                   | 12 (0.5) | 0 (0.0)   | 0 (0.0)  | 0 (0.0) | 0 (0.0) | 3 (0.3)  | 0 (0.0) | * |
| <b>Multiple sclerosis</b>    | 9 (0.4)  | 0 (0.0)   | 0 (0.0)  | 1 (0.5) | 0 (0.0) | 2 (0.2)  | 1 (0.3) | * |
| <b>Chronic liver disease</b> | 2 (0.1)  | 0 (0.0)   | 0 (0.0)  | 0 (0.0) | 0 (0.0) | 0 (0.0)  | 0 (0.0) | * |
| <b>Chronic sinusitis</b>     | 0 (0.0)  | 0 (0.0)   | 0 (0.0)  | 0 (0.0) | 0 (0.0) | 0 (0.0)  | 0 (0.0) | * |

---

\*Categories were dropped for statistical analysis. \* $\chi^2$  test not performed due to small population sizes

Supplemental Table 5. Social deprivation prevalence for each condition for the whole cohort and within SSD and AD.

|                                | Total cohort             |            |            |             |                         |                               | SSD                      |            |            |             |                         |                               | AD                                 |                          |           |            |            |                         |                               |                                    |
|--------------------------------|--------------------------|------------|------------|-------------|-------------------------|-------------------------------|--------------------------|------------|------------|-------------|-------------------------|-------------------------------|------------------------------------|--------------------------|-----------|------------|------------|-------------------------|-------------------------------|------------------------------------|
|                                | 1 - least deprived n (%) | 2 n (%)    | 3 n (%)    | 4 n (%)     | 5 - most deprived n (%) | Not stated <sup>s</sup> n (%) | 1 - least deprived n (%) | 2 n (%)    | 3 n (%)    | 4 n (%)     | 5 - most deprived n (%) | Not stated <sup>s</sup> n (%) | Chi square                         | 1 - least deprived n (%) | 2 n (%)   | 3 n (%)    | 4 n (%)    | 5 - most deprived n (%) | Not stated <sup>s</sup> n (%) | Chi square                         |
| <b>Total</b>                   | 742 (100)                | 1384 (100) | 3575 (100) | 7073 (100)  | 4033 (100)              | 693 (100)                     | 412 (100)                | 887 (100)  | 2503 (100) | 5476 (100)  | 3204 (100)              | 537 (100)                     |                                    | 330 (100)                | 497 (100) | 1072 (100) | 1597 (100) | 829 (100)               | 156 (100)                     |                                    |
| <b>Diabetes ***</b>            | 62 (8.4)                 | 169 (12.2) | 528 (14.8) | 1201 (17.0) | 698 (17.3)              | 28 (4.0)                      | 49 (11.9)                | 117 (13.2) | 409 (16.3) | 1019 (18.6) | 594 (18.5)              | 20 (3.7)                      | X <sup>2</sup> (4) = 29.7; p<0.001 | 13 (3.9)                 | 52 (10.5) | 119 (11.1) | 182 (11.4) | 104 (12.5)              | 8 (5.1)                       | X <sup>2</sup> (4) = 19.4; p=0.007 |
| <b>Hypertension ***</b>        | 77 (10.4)                | 154 (11.1) | 468 (13.1) | 1189 (16.8) | 627 (15.5)              | 22 (3.2)                      | 51 (12.4)                | 108 (12.2) | 368 (14.7) | 1008 (18.4) | 517 (16.1)              | 18 (3.4)                      | X <sup>2</sup> (4) = 37.8; p<0.001 | 26 (7.9)                 | 46 (9.3)  | 100 (9.3)  | 181 (11.3) | 110 (13.3)              | 4 (2.6)                       | X <sup>2</sup> (4) = 12.3; p=0.17  |
| <b>Asthma ***</b>              | 42 (5.7)                 | 95 (6.9)   | 361 (10.1) | 758 (10.7)  | 432 (10.7)              | 34 (4.9)                      | 27 (6.6)                 | 61 (6.9)   | 251 (10.0) | 589 (10.8)  | 337 (10.5)              | 26 (4.8)                      | X <sup>2</sup> (4) = 19.0; p=0.01  | 15 (4.5)                 | 34 (6.8)  | 110 (10.3) | 169 (10.6) | 95 (11.5)               | 8 (5.1)                       | X <sup>2</sup> (4) = 19.2; p=0.008 |
| <b>Arthritis</b>               | 36 (4.9)                 | 56 (4.0)   | 188 (5.3)  | 411 (5.8)   | 256 (6.3)               | 7 (1.0)                       | 18 (4.4)                 | 36 (4.1)   | 135 (5.4)  | 312 (5.7)   | 197 (6.1)               | 4 (0.7)                       | X <sup>2</sup> (4) = 7.30; p>0.99  | 18 (5.5)                 | 20 (4.0)  | 53 (4.9)   | 99 (6.2)   | 59 (7.1)                | 3 (1.9)                       | X <sup>2</sup> (4) = 7.51; p>0.99  |
| <b>Epilepsy</b>                | 32 (4.3)                 | 50 (3.6)   | 160 (4.5)  | 344 (4.9)   | 202 (5.0)               | 11 (1.2)                      | 24 (5.8)                 | 40 (4.5)   | 123 (4.9)  | 292 (5.3)   | 164 (5.1)               | 9 (1.7)                       | X <sup>2</sup> (4) = 1.79; p>0.99  | 8 (2.4)                  | 10 (2.0)  | 37 (3.5)   | 52 (3.3)   | 38 (4.6)                | 2 (1.3)                       | X <sup>2</sup> (4) = 7.59; p>0.99  |
| <b>CVA</b>                     | 19 (2.6)                 | 52 (3.8)   | 146 (4.1)  | 328 (4.6)   | 180 (4.5)               | 3 (0.4)                       | 12 (2.9)                 | 33 (3.7)   | 107 (4.3)  | 272 (5.0)   | 146 (4.6)               | 3 (0.6)                       | X <sup>2</sup> (4) = 6.55; p>0.99  | 7 (2.1)                  | 19 (3.8)  | 39 (3.6)   | 56 (3.5)   | 34 (4.1)                | 0                             | X <sup>2</sup> (4) = 2.80; p>0.99  |
| <b>Eczema</b>                  | 22 (3.0)                 | 45 (3.3)   | 120 (3.4)  | 273 (3.9)   | 147 (3.6)               | 9 (1.3)                       | 17 (4.1)                 | 34 (3.8)   | 86 (3.4)   | 212 (3.9)   | 123 (3.8)               | 7 (1.3)                       | X <sup>2</sup> (4) = 1.11; p>0.99  | 5 (1.5)                  | 11 (2.2)  | 34 (3.2)   | 61 (3.8)   | 24 (2.9)                | 2 (1.3)                       | X <sup>2</sup> (4) = 6.90; p>0.99  |
| <b>Migraine</b>                | 17 (2.3)                 | 39 (2.8)   | 121 (3.4)  | 243 (3.4)   | 140 (3.5)               | 4 (0.6)                       | 11 (2.7)                 | 20 (2.3)   | 63 (2.5)   | 176 (3.2)   | 99 (3.1)                | 3 (0.6)                       | X <sup>2</sup> (4) = 4.79; p>0.99  | 6 (1.8)                  | 19 (3.8)  | 58 (5.4)   | 67 (4.2)   | 41 (4.9)                | 1 (0.6)                       | X <sup>2</sup> (4) = 8.94; p=0.69  |
| <b>Ischaemic heart disease</b> | 20 (2.7)                 | 48 (3.5)   | 103 (2.9)  | 240 (3.4)   | 143 (3.5)               | 7 (1.0)                       | 9 (2.2)                  | 33 (3.7)   | 74 (3.0)   | 194 (3.5)   | 120 (3.7)               | 5 (0.9)                       | X <sup>2</sup> (4) = 4.99; p>0.99  | 11 (3.3)                 | 15 (3.0)  | 29 (2.7)   | 46 (2.9)   | 23 (2.8)                | 2 (1.3)                       | X <sup>2</sup> (4) = 0.43; p>0.99  |
| <b>COPD **</b>                 | 6 (0.8)                  | 35 (2.5)   | 83 (2.3)   | 208 (2.9)   | 139 (3.4)               | 5 (0.7)                       | 3 (0.7)                  | 22 (2.5)   | 59 (2.4)   | 159 (2.9)   | 95 (3.0)                | 4 (0.7)                       | X <sup>2</sup> (4) = 9.07; p=0.77  | 3 (0.9)                  | 13 (2.6)  | 24 (2.2)   | 49 (3.1)   | 44 (5.3)                | 1 (0.6)                       | X <sup>2</sup> (4) = 21.9; p=0.002 |



|                              |             |             |             |              |             |            |            |             |             |             |             |            |                                         |            |             |             |             |             |            |                                      |
|------------------------------|-------------|-------------|-------------|--------------|-------------|------------|------------|-------------|-------------|-------------|-------------|------------|-----------------------------------------|------------|-------------|-------------|-------------|-------------|------------|--------------------------------------|
| <b>CKD</b>                   | 8<br>(1.1)  | 22<br>(1.6) | 46<br>(1.3) | 128<br>(1.8) | 74<br>(1.8) | 1<br>(0.1) | 4<br>(1.0) | 9<br>(1.0)  | 28<br>(1.1) | 81<br>(1.5) | 56<br>(1.7) | 1<br>(0.2) | X <sup>2</sup> (4) =<br>5.83;<br>p>0.99 | 4<br>(1.2) | 13<br>(2.6) | 18<br>(1.7) | 47<br>(2.9) | 18<br>(2.2) | 0          | X <sup>2</sup> (4) = 6.76;<br>p>0.99 |
| <b>PD</b>                    | 9<br>(1.2)  | 22<br>(1.6) | 51<br>(1.4) | 121<br>(1.7) | 60<br>(1.5) | 3<br>(0.4) | 5<br>(1.2) | 16<br>(1.8) | 33<br>(1.3) | 97<br>(1.8) | 48<br>(1.5) | 2<br>(0.4) | X <sup>2</sup> (4) =<br>3.13;<br>p>0.99 | 4<br>(1.2) | 6<br>(1.2)  | 18<br>(1.7) | 24<br>(1.5) | 12<br>(1.4) | 1<br>(0.6) | ---                                  |
| <b>Heart failure</b>         | 10<br>(1.3) | 12<br>(0.9) | 47<br>(1.3) | 92<br>(1.3)  | 58<br>(1.4) | 3<br>(0.4) | 7<br>(1.7) | 10<br>(1.1) | 39<br>(1.6) | 78<br>(1.4) | 52<br>(1.6) | 1<br>(0.2) | X <sup>2</sup> (4) =<br>1.54;<br>p=0.82 | 3<br>(0.9) | 2<br>(0.4)  | 8<br>(0.7)  | 14<br>(0.9) | 6<br>(0.7)  | 2<br>(1.3) | ---                                  |
| <b>Psoriasis</b>             | 11<br>(1.5) | 12<br>(0.9) | 33<br>(0.9) | 71<br>(1.0)  | 48<br>(1.2) | 4<br>(0.6) | 4<br>(1.0) | 6<br>(0.7)  | 24<br>(1.0) | 54<br>(1.0) | 37<br>(1.2) | 4<br>(0.7) | ---                                     | 7<br>(2.1) | 6<br>(1.2)  | 9<br>(0.8)  | 17<br>(1.1) | 11<br>(1.3) | 0          | ---                                  |
| <b>Atrial fibrillation</b>   | 10<br>(1.3) | 11<br>(0.8) | 27<br>(0.8) | 53<br>(0.7)  | 29<br>(0.7) | 3<br>(0.4) | 6<br>(1.5) | 7<br>(0.8)  | 21<br>(0.8) | 42<br>(0.8) | 23<br>(0.7) | 1<br>(0.2) | ---                                     | 4<br>(1.2) | 4<br>(0.8)  | 6<br>(0.6)  | 11<br>(0.7) | 6<br>(0.7)  | 2<br>(1.3) | ---                                  |
| <b>TIA</b>                   | 3<br>(0.3)  | 17<br>(1.0) | 27<br>(0.6) | 55<br>(0.6)  | 28<br>(0.5) | 0          | 1<br>(0.2) | 9<br>(1.0)  | 16<br>(0.6) | 43<br>(0.8) | 22<br>(0.7) | 0          | ---                                     | 2<br>(0.6) | 8<br>(1.6)  | 11<br>(1.0) | 12<br>(0.8) | 6<br>(0.7)  | 0          | ---                                  |
| <b>IBD</b>                   | 1<br>(0.1)  | 4<br>(0.3)  | 10<br>(0.3) | 12<br>(0.2)  | 13<br>(0.3) | 0          | 0          | 1<br>(0.1)  | 7<br>(0.3)  | 7<br>(0.1)  | 10<br>(0.3) | 0          | ---                                     | 1<br>(0.3) | 3<br>(0.6)  | 3<br>(0.3)  | 5<br>(0.3)  | 3<br>(0.4)  | 0          | ---                                  |
| <b>MS</b>                    | 4<br>(0.5)  | 2<br>(0.1)  | 7<br>(0.2)  | 14<br>(0.2)  | 4<br>(0.1)  | 1<br>(0.1) | 2<br>(0.5) | 2<br>(0.2)  | 2<br>(0.1)  | 9<br>(0.2)  | 3<br>(0.1)  | 1<br>(0.2) | ---                                     | 2<br>(0.6) | 0           | 5<br>(0.5)  | 5<br>(0.3)  | 1<br>(0.1)  | 0          | ---                                  |
| <b>Chronic liver disease</b> | 0           | 1<br>(0.1)  | 8<br>(0.2)  | 8<br>(0.1)   | 5<br>(0.1)  | 0          | 0          | 0           | 8<br>(0.3)  | 8<br>(0.1)  | 4<br>(0.1)  | 0          | ---                                     | 0          | 1<br>(0.2)  | 0           | 0           | 1<br>(0.1)  | 0          | ---                                  |
| <b>Chronic sinusitis</b>     | 0           | 0           | 1<br>(0.0)  | 2<br>(0.0)   | 3<br>(0.1)  | 0          | 0          | 0           | 1<br>(0.0)  | 2<br>(0.0)  | 3<br>(0.1)  | 0          | ---                                     | 0          | 0           | 0           | 0           | 0           | 0          | ---                                  |

\*, p<0.05; \*\*, p≤0.01; \*\*\*, p≤0.001; CVA, cerebrovascular accident; COPD, chronic obstructive lung disease; CKD, chronic kidney disease; PD, Parkinson's disease; TIA, transient ischemic attack; IBD, inflammatory bowel disease; MS, multiple sclerosis

1  
2  
3  
4  
5  
6  
7  
8  
9  
10  
11  
12  
13  
14  
15  
16  
17  
18  
19  
20  
21  
22  
23  
24  
25  
26  
27  
28  
29  
30  
31  
32  
33  
34  
35  
36  
37  
38  
39  
40  
41  
42  
43  
44  
45  
46  
47  
48  
49  
50  
51  
52  
53  
54  
55  
56  
57  
58  
59  
60

For peer review only

Supplemental Table 6. Sociodemographic features of cohort in HoNOS subsample analysis

|                                         | <b>Total<br/>n (%)</b> | <b>SSD<br/>n (%)</b> | <b>BD<br/>n (%)</b> |
|-----------------------------------------|------------------------|----------------------|---------------------|
| <b>Totals n (%)</b>                     | 13650 (100.0)          | 10384 (76.1)         | 3266 (23.9)         |
| <b>Sex***</b>                           |                        |                      |                     |
| Female                                  | 6537 (47.9)            | 4526 (69.2)          | 2011 (30.8)         |
| Male                                    | 7112 (52.1)            | 5858 (82.4)          | 1254 (17.6)         |
| <b>Age at first SMI diagnosis***</b>    |                        |                      |                     |
| 15 – 34                                 | 5821 (42.6)            | 4420 (42.6)          | 1401 (42.9)         |
| 35 – 44                                 | 3430 (25.1)            | 2183 (75.3)          | 716 (24.7)          |
| 45 – 54                                 | 2082 (15.3)            | 1594 (76.6)          | 488 (23.4)          |
| 55 – 64                                 | 1089 (8.0)             | 811 (74.5)           | 278 (25.5)          |
| 65+                                     | 1759 (12.9)            | 1376 (13.3)          | 383 (11.7)          |
| <b>Ethnicity***</b>                     |                        |                      |                     |
| White British                           | 4571 (33.5)            | 2961 (64.8)          | 1610 (35.2)         |
| Black Caribbean                         | 2849 (20.9)            | 2515 (88.3)          | 334 (11.7)          |
| Black African                           | 1852 (13.6)            | 1679 (90.7)          | 173 (9.3)           |
| South Asian                             | 436 (3.2)              | 338 (77.5)           | 98 (22.5)           |
| Irish                                   | 286 (2.1)              | 197 (68.9)           | 89 (31.1)           |
| Other <sup>§</sup>                      | 3127 (22.9)            | 2327 (74.4)          | 800 (25.6)          |
| Not stated <sup>§</sup>                 | 529 (3.9)              | 367 (3.5)            | 162 (5.0)           |
| <b>Index of multiple deprivation***</b> |                        |                      |                     |
| 1 (least deprivation)                   | 380 (2.8)              | 237 (62.4)           | 143 (37.6)          |
| 2                                       | 883 (6.5)              | 581 (65.8)           | 302 (34.2)          |
| 3                                       | 2786 (20.4)            | 1994 (71.6)          | 792 (28.4)          |
| 4                                       | 5947 (43.6)            | 4654 (78.3)          | 1293 (21.7)         |
| 5 (most deprivation)                    | 3308 (24.2)            | 2650 (80.1)          | 658 (19.9)          |
| Unknown <sup>§</sup>                    | 346 (2.5)              | 268 (77.5)           | 78 (22.5)           |
| <b>Physical conditions***</b>           |                        |                      |                     |
| No mentions                             | 7232 (53.0)            | 5320 (73.6)          | 1912 (26.4)         |
| One                                     | 3295 (24.1)            | 2596 (78.8)          | 699 (21.2)          |
| Two                                     | 1669 (12.2)            | 1340 (80.3)          | 329 (19.7)          |
| Three or more                           | 1454 (10.7)            | 1128 (77.6)          | 326 (22.4)          |

Note: \*\*\*  $p < .001$  for comparisons between BD and SSD groups. <sup>§</sup>Not included in analyses.

Supplemental Table 7. Associations between comorbidities and HoNOS scores in SSD.

| Comorbidity                     | HoNOS Score  | Unadjusted                  | M1                          | M2a                         |
|---------------------------------|--------------|-----------------------------|-----------------------------|-----------------------------|
|                                 | Mean (SD)    | B (95% CI)                  | B (95% CI)                  | B (95% CI)                  |
| <b>Whole cohort</b>             | 10.75 (6.10) |                             |                             |                             |
| <b>Diabetes</b>                 | 11.04 (6.10) | 0.360<br>(0.067 – 0.654)**  | 0.224<br>(-0.073 – 0.522)   | 0.300<br>(-0.002 – 0.602)   |
| Ref: No diabetes                | 10.68 (6.10) |                             |                             |                             |
| <b>Hypertension</b>             | 11.17 (6.05) | 0.519<br>(0.220 – 0.818)*** | 0.264<br>(-0.048 – 0.575)   | 0.324<br>(0.006 – 0.641)*   |
| Ref: No hypertension            | 10.65 (6.11) |                             |                             |                             |
| <b>Asthma</b>                   | 11.19 (6.11) | 0.492<br>(0.126 – 0.859)**  | 0.551<br>(0.185 – 0.918)**  | 0.530<br>(0.158 – 0.903)**  |
| Ref: No asthma                  | 10.70 (6.10) |                             |                             |                             |
| <b>Arthritis</b>                | 12.08 (6.21) | 1.422<br>(0.948 – 1.895)*** | 1.259<br>(0.775 – 1.742)*** | 1.274<br>(0.788 – 1.759)*** |
| Ref: No arthritis               | 10.66 (6.08) |                             |                             |                             |
| <b>Epilepsy</b>                 | 11.53 (6.24) | 0.827<br>(0.316 – 1.337)*** | 0.850<br>(0.341 – 1.358)*** | 0.856<br>(0.341 – 1.370)*** |
| Ref: No epilepsy                | 10.71 (6.09) |                             |                             |                             |
| <b>CVA</b>                      | 11.87 (6.23) | 1.178<br>(0.651 – 1.705)*** | 0.913<br>(0.383 – 1.443)*** | 0.921<br>(0.388 – 1.454)**  |
| Ref: No CVA                     | 10.69 (6.09) |                             |                             |                             |
| <b>Eczema</b>                   | 11.48 (6.25) | 0.763<br>(0.188 – 1.338)**  | 0.846<br>(0.273 – 1.420)**  | 0.754<br>(0.172 – 1.336)*   |
| Ref: No eczema                  | 10.72 (6.09) |                             |                             |                             |
| <b>Migraine</b>                 | 10.71 (5.87) | -0.041<br>(-0.683 – 0.602)  | 0.196<br>(-0.447 – 0.839)   | 0.192<br>(-0.458 – 0.842)   |
| Ref: No migraine                | 10.75 (6.11) |                             |                             |                             |
| <b>Ischaemic heart disease</b>  | 11.59 (5.91) | 0.874<br>(0.274 – 1.474)**  | 0.520<br>(-0.083 – 1.124)   | 0.477<br>(-0.132 – 1.085)   |
| Ref: No ischaemic heart disease | 10.72 (6.11) |                             |                             |                             |
| <b>COPD</b>                     | 12.15 (5.70) | 1.444<br>(0.760 – 2.128)*** | 1.045<br>(0.354 – 1.736)**  | 1.043<br>(0.343 – 1.742)**  |
| Ref: No COPD                    | 10.71 (6.11) |                             |                             |                             |
| <b>Number of comorbidities</b>  |              | 0.387<br>(0.294 – 0.481)*** | 0.328<br>(0.231 – 0.425)*** | 0.342<br>(0.243 – 0.441)*** |
| <b>1 or more comorbidities</b>  | 11.13 (6.11) | 0.745<br>(0.511 – 0.980)*** | 0.607<br>(0.367 – 0.847)*** | 0.657<br>(0.410 – 0.903)*** |
| Ref: No comorbidities           | 10.39 (6.07) |                             |                             |                             |
| <b>2 or more comorbidities</b>  | 11.45 (6.16) | 0.921<br>(0.646 – 1.196)*** | 0.747<br>(0.464 – 1.030)*** | 0.771<br>(0.484 – 1.059)*** |
| Ref: Less than 1 comorbidities  | 10.53 (6.07) |                             |                             |                             |

Supplemental Table 8. Associations between comorbidities and HoNOS scores in BD.

| Comorbidity                     | HoNOS Score   | Unadjusted                  | M1                          | M2a                         |
|---------------------------------|---------------|-----------------------------|-----------------------------|-----------------------------|
|                                 | Mean (SD)     | B (95% CI)                  | B (95% CI)                  | B (95% CI)                  |
| <b>Whole cohort</b>             | 9.28 (5.77)   |                             |                             |                             |
| <b>Diabetes</b>                 | 10.941 (5.97) | 1.304<br>(0.720 – 1.887)*** | 0.968<br>(0.370 – 1.565)**  | 0.961<br>(0.355 – 1.568)**  |
| Ref: No diabetes                | 9.11 (5.72)   |                             |                             |                             |
| <b>Hypertension</b>             | 10.13 (5.82)  | 0.972<br>(0.384 – 1.561)**  | 0.446<br>(-0.182 – 1.074)   | 0.277<br>(-0.359 – 0.912)   |
| Ref: No hypertension            | 9.15 (5.76)   |                             |                             |                             |
| <b>Asthma</b>                   | 10.61 (6.27)  | 1.512<br>(0.900 – 2.124)*** | 1.597<br>(0.985 – 2.210)*** | 1.503<br>(0.887 – 2.120)*** |
| Ref: No asthma                  | 9.10 (5.68)   |                             |                             |                             |
| <b>Arthritis</b>                | 11.81 (6.13)  | 2.725<br>(1.960 – 3.490)*** | 2.487<br>(1.702 – 3.273)*** | 2.396<br>(1.606 – 3.186)*** |
| Ref: No arthritis               | 9.09 (5.70)   |                             |                             |                             |
| <b>Epilepsy</b>                 | 10.77 (5.96)  | 1.552<br>(0.513 – 2.591)**  | 1.587<br>(0.551 – 2.624)**  | 1.496<br>(0.466 – 2.527)**  |
| Ref: No epilepsy                | 9.22 (5.76)   |                             |                             |                             |
| <b>CVA</b>                      | 11.60 (6.16)  | 2.425<br>(1.464 – 3.386)*** | 2.098<br>(1.124 – 3.071)*** | 2.030<br>(1.064 – 2.996)*** |
| Ref: No CVA                     | 9.17 (5.73)   |                             |                             |                             |
| <b>Eczema</b>                   | 9.83 (5.82)   | 0.578<br>(-0.446 – 1.603)   | 0.622<br>(-0.400 – 1.644)   | 0.427<br>(-0.603 – 1.458)   |
| Ref: No eczema                  | 9.26 (5.77)   |                             |                             |                             |
| <b>Migraine</b>                 | 9.55 (5.34)   | 0.284<br>(-0.586 – 1.154)   | 0.523<br>(-0.350 – 1.397)   | 0.527<br>(-0.346 – 1.400)   |
| Ref: No migraine                | 9.26 (5.80)   |                             |                             |                             |
| <b>Ischaemic heart disease</b>  | 11.84 (5.95)  | 2.649<br>(1.560 – 3.738)*** | 2.093<br>(0.987 – 3.200)*** | 2.204<br>(1.098 – 3.309)**  |
| Ref: No ischaemic heart disease | 9.19 (5.75)   |                             |                             |                             |
| <b>COPD</b>                     | 11.89 (5.99)  | 2.711<br>(1.679 – 3.743)*** | 2.298<br>(1.248 – 3.348)*** | 2.128<br>(1.077 – 3.179)*** |
| Ref: No COPD                    | 9.18 (5.74)   |                             |                             |                             |
| <b>Number of comorbidities</b>  |               | 0.723<br>(0.566 – 0.879)*** | 0.661<br>(0.494 – 0.828)*** | 0.642<br>(0.473 – 0.811)*** |
| <b>1 or more comorbidities</b>  | 10.30 (5.91)  | 1.740<br>(1.343 – 2.138)*** | 1.559<br>(1.143 – 1.974)*** | 1.457<br>(1.031 – 1.883)*** |
| Ref: No comorbidities           | 8.56 (5.57)   |                             |                             |                             |
| <b>2 or more comorbidities</b>  | 10.89 (5.99)  | 2.013<br>(1.524 – 2.503)*** | 1.797<br>(1.280 – 2.314)*** | 1.789<br>(1.267 – 2.311)*** |
| Ref: Less than 1 comorbidities  | 8.88 (5.64)   |                             |                             |                             |

Supplemental Figure 1. Distribution of all conditions in the SMI cohort by SMI diagnoses

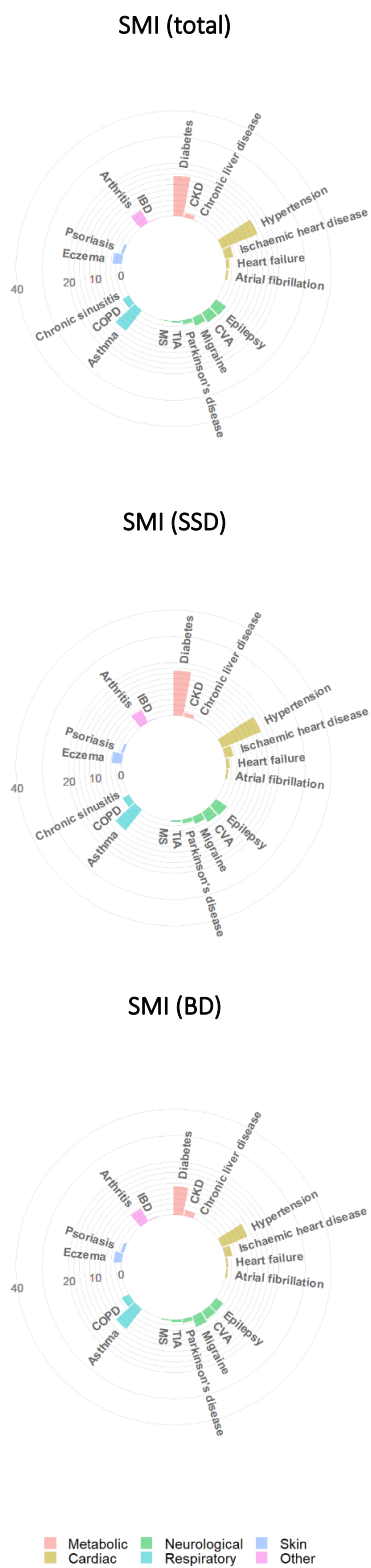

Supplemental Figure 2. Prevalence rates for age at SMI diagnoses per condition and comparison between individuals with BD and SSD.

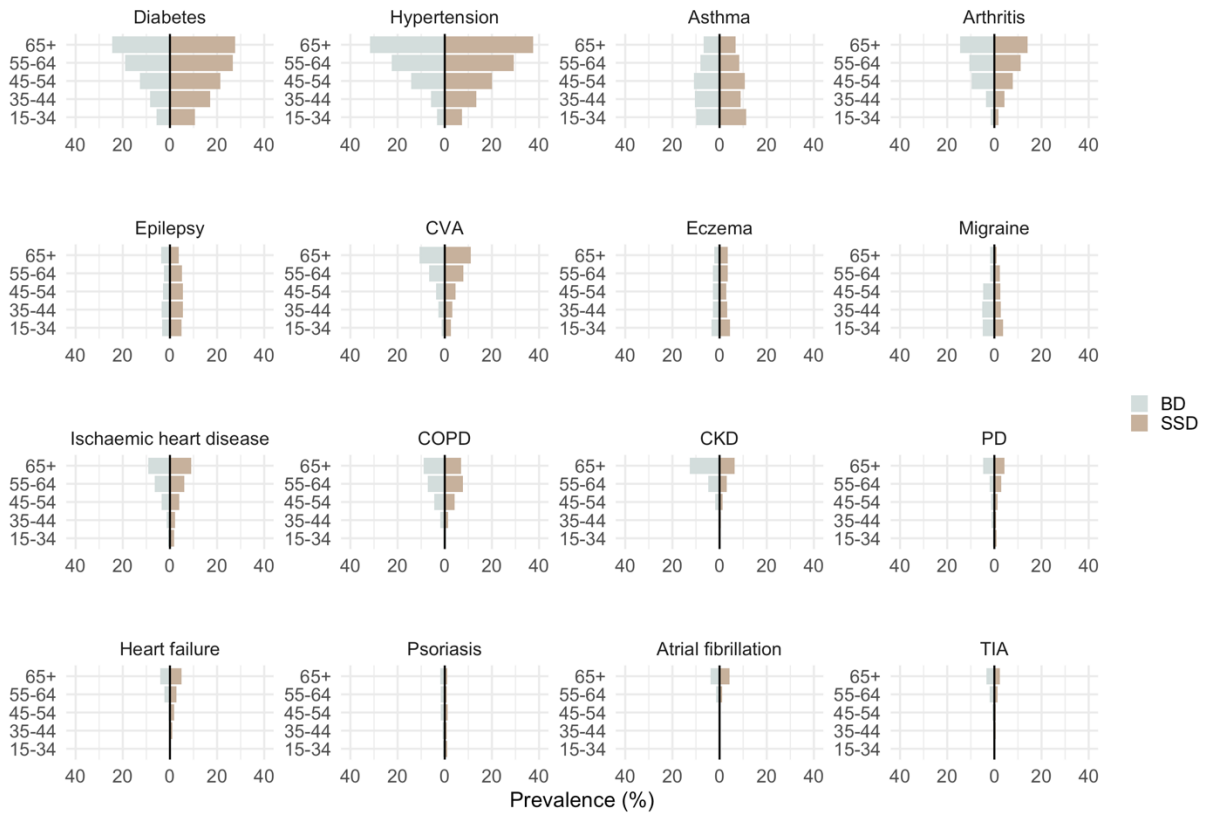

**Appendix 1. SNOMED Container and Concept Level Groupings for physical health conditions included in this study.**

| Container Concept                                                | Concepts                                                                                                                                                                                                                                                                                                                                |
|------------------------------------------------------------------|-----------------------------------------------------------------------------------------------------------------------------------------------------------------------------------------------------------------------------------------------------------------------------------------------------------------------------------------|
| S-73211009 - Diabetes mellitus (disorder)                        | S-44054006 - Diabetes mellitus type 2 (disorder)<br>S-46635009 - Diabetes mellitus type 1 (disorder)<br>S-422088007 - Disorder of nervous system co-occurrent and due to diabetes mellitus (disorder)<br>S-25093002 - Disorder of eye co-occurrent and due to diabetes mellitus (disorder)<br>S-73211009 - Diabetes mellitus (disorder) |
| S-84114007 - Heart failure (disorder)                            | S-128404006 - Right heart failure (disorder)<br>S-48447003 - Chronic heart failure (disorder)<br>S-56675007 - Acute heart failure (disorder)<br>S-85232009 - Left heart failure (disorder)<br>S-42343007 - Congestive heart failure (disorder)<br>S-84114007 - Heart failure (disorder)                                                 |
| S-414545008 - Ischemic heart disease (disorder)                  | S-413439005 - Acute ischemic heart disease (disorder)<br>S-413838009 - Chronic ischemic heart disease (disorder)<br>S-194828000 - Angina (disorder)<br>S-22298006 - Myocardial infarction (disorder)<br>S-414545008 - Ischemic heart disease (disorder)                                                                                 |
| S-38341003 - Hypertensive disorder, systemic arterial (disorder) | S-31992008 - Secondary hypertension (disorder)<br>S-48146000 - Diastolic hypertension (disorder)<br>S-56218007 - Systolic hypertension (disorder)<br>S-59621000 - Essential hypertension (disorder)<br>S-38341003 - Hypertensive disorder, systemic arterial (disorder)                                                                 |
| S-13645005 - Chronic obstructive lung disease (disorder)         | S-195951007 - Acute exacerbation of chronic obstructive airways disease (disorder)<br>S-87433001 - Pulmonary emphysema (disorder)<br>S-13645005 - Chronic obstructive lung disease (disorder)                                                                                                                                           |
| S-195967001 - Asthma (disorder)                                  | S-195967001 - Asthma (disorder)                                                                                                                                                                                                                                                                                                         |
| S-709044004 - Chronic kidney disease (disorder)                  | S-723190009 - Chronic renal insufficiency (disorder)<br>S-709044004 - Chronic kidney disease (disorder)                                                                                                                                                                                                                                 |



|                                                    |                                                                                                                                                                                                                                                                                                                                                                                                       |
|----------------------------------------------------|-------------------------------------------------------------------------------------------------------------------------------------------------------------------------------------------------------------------------------------------------------------------------------------------------------------------------------------------------------------------------------------------------------|
| S-230690007 - Cerebrovascular accident (disorder)  | S-25133001 - Completed stroke (disorder)<br>S-371040005 - Thrombotic stroke (disorder)<br>S-371041009 - Embolic stroke (disorder)<br>S-413102000 - Infarction of basal ganglia (disorder)<br>S-422504002 - Ischemic stroke (disorder)<br>S-723082006 - Silent cerebral infarct (disorder)<br>S-1078001000000105 - Haemorrhagic stroke (disorder)<br>S-230690007 - Cerebrovascular accident (disorder) |
| S-266257000 - Transient ischemic attack (disorder) | S-266257000 - Transient ischemic attack (disorder)                                                                                                                                                                                                                                                                                                                                                    |
| S-49049000 - Parkinson's disease (disorder)        | S-49049000 - Parkinson's disease (disorder)                                                                                                                                                                                                                                                                                                                                                           |
| S-24700007 - Multiple sclerosis (disorder)         | S-24700007 - Multiple sclerosis (disorder)                                                                                                                                                                                                                                                                                                                                                            |
| S-84757009 - Epilepsy (disorder)                   | S-352818000 - Tonic-clonic epilepsy (disorder)<br>S-19598007 - Generalized epilepsy (disorder)<br>S-230456007 - Status epilepticus (disorder)<br>S-509341000000107 - Petit-mal epilepsy (disorder)<br>S-84757009 - Epilepsy (disorder)                                                                                                                                                                |
| S-37796009 - Migraine (disorder)                   | S-37796009 - Migraine (disorder)<br>S-4473006 - Migraine with aura (disorder)<br>S-56097005 - Migraine without aura (disorder)                                                                                                                                                                                                                                                                        |
| S-53741008 - Coronary arteriosclerosis (disorder)  | S-810681000000101 - Coronary microvascular disease (disorder)<br>S-53741008 - Coronary arteriosclerosis (disorder)                                                                                                                                                                                                                                                                                    |
| S-49436004 - Atrial fibrillation (disorder)        | S-49436004 - Atrial fibrillation (disorder)                                                                                                                                                                                                                                                                                                                                                           |
| S-40055000 - Chronic sinusitis (disorder)          | S-40055000 - Chronic sinusitis (disorder)                                                                                                                                                                                                                                                                                                                                                             |
| S-24526004 - Inflammatory bowel disease (disorder) | S-24526004 - Inflammatory bowel disease (disorder)<br>S-397173003 - Crohn's disease of intestine (disorder)<br>S-64766004 - Ulcerative colitis (disorder)                                                                                                                                                                                                                                             |
| S-328383001 - Chronic liver disease (disorder)     | S-328383001 - Chronic liver disease (disorder)<br>S-76783007 - Chronic hepatitis (disorder)<br>S-79720007 - Chronic nonalcoholic liver disease (disorder)                                                                                                                                                                                                                                             |

|                                  |                                                                                                                                                                                                                             |
|----------------------------------|-----------------------------------------------------------------------------------------------------------------------------------------------------------------------------------------------------------------------------|
|                                  | S-713181003 - Chronic alcoholic liver disease (disorder)                                                                                                                                                                    |
| S-9014002 - Psoriasis (disorder) | S-9014002 - Psoriasis (disorder)                                                                                                                                                                                            |
| S-43116000 - Eczema (disorder)   | S-43116000 - Eczema (disorder)                                                                                                                                                                                              |
| S-3723001 - Arthritis (disorder) | S-69896004 - Rheumatoid arthritis (disorder)<br>S-399112009 - Seronegative arthritis (disorder)<br>S-35908007 - Chronic arthritis (disorder)<br>S-11939005 - Acute arthritis (disorder)<br>S-3723001 - Arthritis (disorder) |

## STROBE Statement—checklist of items that should be included in reports of observational studies

|                              | Item No | Recommendation                                                                                                                                                                                                                                                                                                                                                                                                                                                         | Page No |
|------------------------------|---------|------------------------------------------------------------------------------------------------------------------------------------------------------------------------------------------------------------------------------------------------------------------------------------------------------------------------------------------------------------------------------------------------------------------------------------------------------------------------|---------|
| <b>Title and abstract</b>    | 1       | (a) Indicate the study's design with a commonly used term in the title or the abstract                                                                                                                                                                                                                                                                                                                                                                                 | 1       |
|                              |         | (b) Provide in the abstract an informative and balanced summary of what was done and what was found                                                                                                                                                                                                                                                                                                                                                                    | 2       |
| <b>Introduction</b>          |         |                                                                                                                                                                                                                                                                                                                                                                                                                                                                        |         |
| Background/rationale         | 2       | Explain the scientific background and rationale for the investigation being reported                                                                                                                                                                                                                                                                                                                                                                                   | 4,5     |
| Objectives                   | 3       | State specific objectives, including any prespecified hypotheses                                                                                                                                                                                                                                                                                                                                                                                                       | 5       |
| <b>Methods</b>               |         |                                                                                                                                                                                                                                                                                                                                                                                                                                                                        |         |
| Study design                 | 4       | Present key elements of study design early in the paper                                                                                                                                                                                                                                                                                                                                                                                                                | 5,6     |
| Setting                      | 5       | Describe the setting, locations, and relevant dates, including periods of recruitment, exposure, follow-up, and data collection                                                                                                                                                                                                                                                                                                                                        | 5,6     |
| Participants                 | 6       | (a) <i>Cohort study</i> —Give the eligibility criteria, and the sources and methods of selection of participants. Describe methods of follow-up<br><i>Case-control study</i> —Give the eligibility criteria, and the sources and methods of case ascertainment and control selection. Give the rationale for the choice of cases and controls<br><i>Cross-sectional study</i> —Give the eligibility criteria, and the sources and methods of selection of participants | 5       |
|                              |         | (b) <i>Cohort study</i> —For matched studies, give matching criteria and number of exposed and unexposed<br><i>Case-control study</i> —For matched studies, give matching criteria and the number of controls per case                                                                                                                                                                                                                                                 |         |
| Variables                    | 7       | Clearly define all outcomes, exposures, predictors, potential confounders, and effect modifiers. Give diagnostic criteria, if applicable                                                                                                                                                                                                                                                                                                                               | 6-8     |
| Data sources/<br>measurement | 8*      | For each variable of interest, give sources of data and details of methods of assessment (measurement). Describe comparability of assessment methods if there is more than one group                                                                                                                                                                                                                                                                                   | 6-8     |
| Bias                         | 9       | Describe any efforts to address potential sources of bias                                                                                                                                                                                                                                                                                                                                                                                                              | 6-9     |
| Study size                   | 10      | Explain how the study size was arrived at                                                                                                                                                                                                                                                                                                                                                                                                                              | 5,6     |
| Quantitative variables       | 11      | Explain how quantitative variables were handled in the analyses. If applicable, describe which groupings were chosen and why                                                                                                                                                                                                                                                                                                                                           | 6-8     |
| Statistical methods          | 12      | (a) Describe all statistical methods, including those used to control for confounding                                                                                                                                                                                                                                                                                                                                                                                  | 8,9     |
|                              |         | (b) Describe any methods used to examine subgroups and interactions                                                                                                                                                                                                                                                                                                                                                                                                    | 8,9     |
|                              |         | (c) Explain how missing data were addressed                                                                                                                                                                                                                                                                                                                                                                                                                            | 8,9     |
|                              |         | (d) <i>Cohort study</i> —If applicable, explain how loss to follow-up was addressed<br><i>Case-control study</i> —If applicable, explain how matching of cases and controls was addressed<br><i>Cross-sectional study</i> —If applicable, describe analytical methods taking account of sampling strategy                                                                                                                                                              | 8,9     |
|                              |         | (e) Describe any sensitivity analyses                                                                                                                                                                                                                                                                                                                                                                                                                                  | 8,9     |

Continued on next page

| <b>Results</b>           |     |                                                                                                                                                                                                                                                                                                                                                                                                               |       |
|--------------------------|-----|---------------------------------------------------------------------------------------------------------------------------------------------------------------------------------------------------------------------------------------------------------------------------------------------------------------------------------------------------------------------------------------------------------------|-------|
| Participants             | 13* | (a) Report numbers of individuals at each stage of study—eg numbers potentially eligible, examined for eligibility, confirmed eligible, included in the study, completing follow-up, and analysed<br>(b) Give reasons for non-participation at each stage<br>(c) Consider use of a flow diagram                                                                                                               | 10    |
| Descriptive data         | 14* | (a) Give characteristics of study participants (eg demographic, clinical, social) and information on exposures and potential confounders<br>(b) Indicate number of participants with missing data for each variable of interest<br>(c) <i>Cohort study</i> —Summarise follow-up time (eg, average and total amount)                                                                                           | 10    |
| Outcome data             | 15* | <i>Cohort study</i> —Report numbers of outcome events or summary measures over time<br><i>Case-control study</i> —Report numbers in each exposure category, or summary measures of exposure<br><i>Cross-sectional study</i> —Report numbers of outcome events or summary measures                                                                                                                             | 9-13  |
| Main results             | 16  | (a) Give unadjusted estimates and, if applicable, confounder-adjusted estimates and their precision (eg, 95% confidence interval). Make clear which confounders were adjusted for and why they were included<br>(b) Report category boundaries when continuous variables were categorized<br>(c) If relevant, consider translating estimates of relative risk into absolute risk for a meaningful time period | 9-13  |
| Other analyses           | 17  | Report other analyses done—eg analyses of subgroups and interactions, and sensitivity analyses                                                                                                                                                                                                                                                                                                                | Supp  |
| <b>Discussion</b>        |     |                                                                                                                                                                                                                                                                                                                                                                                                               |       |
| Key results              | 18  | Summarise key results with reference to study objectives                                                                                                                                                                                                                                                                                                                                                      | 13,14 |
| Limitations              | 19  | Discuss limitations of the study, taking into account sources of potential bias or imprecision. Discuss both direction and magnitude of any potential bias                                                                                                                                                                                                                                                    | 16    |
| Interpretation           | 20  | Give a cautious overall interpretation of results considering objectives, limitations, multiplicity of analyses, results from similar studies, and other relevant evidence                                                                                                                                                                                                                                    | 13-17 |
| Generalisability         | 21  | Discuss the generalisability (external validity) of the study results                                                                                                                                                                                                                                                                                                                                         | 16,17 |
| <b>Other information</b> |     |                                                                                                                                                                                                                                                                                                                                                                                                               |       |
| Funding                  | 22  | Give the source of funding and the role of the funders for the present study and, if applicable, for the original study on which the present article is based                                                                                                                                                                                                                                                 | 18    |

\*Give information separately for cases and controls in case-control studies and, if applicable, for exposed and unexposed groups in cohort and cross-sectional studies.

**Note:** An Explanation and Elaboration article discusses each checklist item and gives methodological background and published examples of transparent reporting. The STROBE checklist is best used in conjunction with this article (freely available on the Web sites of PLoS Medicine at <http://www.plosmedicine.org/>, Annals of Internal Medicine at <http://www.annals.org/>, and Epidemiology at <http://www.epidem.com/>). Information on the STROBE Initiative is available at [www.strobe-statement.org](http://www.strobe-statement.org).
