# Supplementary material for: Mapping multimorbidity in individuals with schizophrenia and bipolar disorders: evidence from the South London and Maudsley NHS Foundation Trust Biomedical Research Centre (SLAM BRC) case register
Source: HighWire-hosted journal article supplement (doi:10.1136/bmjopen-2021-054414), 2022-01-01
Supplement: bmjopen-2021-054414supp001_data_supplement.pdf [file bmjopen-2021-054414supp001_data_supplement.pdf]

## **Supplemental Material**

### **Supplemental Tables**

Supplemental Table 1. Meta-annotations performance results for Diagnosis and Status

Supplemental Table 2. Prevalence estimates and sex differences within the whole SMI cohort and SSD and BD subgroups.

Supplemental Table 3. Prevalence for each condition by age ranges at first SMI diagnosis for the whole SMI cohort and SSD and BD subgroups.

Supplemental Tables 4a, 4b and 4c. Prevalence for each condition across ethnicities for the whole SMI cohort and SSD and BD subgroups.

Supplemental Table 5. Social deprivation prevalence for each condition for the whole cohort and within SSD and BD.

Supplemental Table 6. Sociodemographic features of cohort in HoNOS subsample analysis

Supplemental Table 7. Associations between comorbidities and HoNOS scores in SSD.

Supplemental Table 8. Associations between comorbidities and HoNOS scores in BD.

### **Supplemental Figures**

Supplemental Figure 1. Distribution of all conditions in the SMI cohort by SMI group.

Supplemental Figure 2. Prevalence rates for age at SMI diagnoses per condition and comparison between individuals with BD and SSD.

**Appendix 1.** SNOMED Container and Concept Level Groupings for physical health conditions included in this study.

## Supplemental Tables

*Supplemental Table 1. Meta-annotations performance results for Diagnosis and Status*

| <b>Meta-Annotation</b> | <b>Values</b>    | <b>F1 (macro/weighted)</b> | <b>P (macro/weighted)</b> | <b>R (macro/weighted)</b> |
|------------------------|------------------|----------------------------|---------------------------|---------------------------|
| Diagnosis              | Patient / Other  | 0.94 / 0.94                | 0.95 / 0.95               | 0.92 / 0.94               |
| Status                 | Affirmed / Other | 0.89 / 0.98                | 0.94 / 0.98               | 0.85 / 0.98               |

*Supplemental Table 2. Prevalence estimates and sex differences within the whole SMI cohort and SSD and BD subgroups.*

|                                          | Total Cohort   |                | SSD            |                | p-value | BD            |               | p- value |
|------------------------------------------|----------------|----------------|----------------|----------------|---------|---------------|---------------|----------|
|                                          | Female         | Male           | Female         | Male           |         | Female        | Male          |          |
| <b>Diabetes</b>                          | 1282<br>(15.8) | 1403<br>(15)   | 1021<br>(18.8) | 1187<br>(15.6) | <.001   | 261<br>(9.7)  | 216<br>(12.1) | .190     |
| <b>Hypertension ***</b>                  | 1325<br>(16.3) | 1212<br>(12.9) | 1060<br>(19.6) | 1010<br>(13.3) | <.001   | 265<br>(9.8)  | 202<br>(11.4) | 1.000    |
| <b>Asthma **</b>                         | 869<br>(10.7)  | 852<br>(9.1)   | 559<br>(10.3)  | 732<br>(9.6)   | 1.000   | 310<br>(11.5) | 120<br>(6.7)  | <.001    |
| <b>Arthritis ***</b>                     | 657<br>(8.1)   | 297<br>(3.2)   | 471<br>(8.7)   | 231<br>(3.0)   | <.001   | 186<br>(6.9)  | 66<br>(3.7)   | <.001    |
| <b>Epilepsy</b>                          | 349<br>(4.3)   | 450<br>(4.8)   | 253<br>(4.7)   | 399<br>(5.3)   | 1.000   | 96<br>(3.6)   | 51<br>(2.9)   | 1.000    |
| <b>Cerebrovascular diseases</b>          | 367<br>(4.5)   | 361<br>(3.9)   | 265<br>(4.9)   | 308<br>(4.1)   | .499    | 102<br>(3.8)  | 53<br>(3.0)   | 1.000    |
| <b>Eczema *</b>                          | 331<br>(4.1)   | 285<br>(3.0)   | 238<br>(4.4)   | 241<br>(3.2)   | <.01    | 93<br>(3.4)   | 44<br>(2.5)   | 1.000    |
| <b>Migraine ***</b>                      | 369<br>(4.5)   | 194<br>(2.1)   | 217<br>(4.0)   | 155<br>(2.0)   | <.001   | 152<br>(5.6)  | 39<br>(2.2)   | <.001    |
| <b>Ischaemic heart disease</b>           | 249<br>(3.1)   | 312<br>(3.3)   | 196<br>(3.6)   | 239<br>(3.1)   | 1.000   | 53<br>(2.0)   | 73<br>(4.2)   | <.001    |
| <b>Chronic Obstructive Lung diseases</b> | 237<br>(2.9)   | 239<br>(2.5)   | 153<br>(2.8)   | 189<br>(2.5)   | 1.000   | 84<br>(3.1)   | 50<br>(2.8)   | 1.000    |
| <b>Chronic Kidney disease</b>            | 158<br>(1.9)   | 121<br>(1.3)   | 104<br>(1.9)   | 75<br>(1.0)    | <.001   | 54<br>(2.0)   | 46<br>(2.6)   | 1.000    |
| <b>Parkinson disease</b>                 | 113<br>(1.4)   | 153<br>(1.6)   | 81<br>(1.5)    | 120<br>(1.6)   | 1.000   | 32<br>(1.2)   | 33<br>(1.9)   | 1.000    |
| <b>Heart failure</b>                     | 123<br>(1.5)   | 99<br>(1.0)    | 105<br>(1.9)   | 82<br>(1.1)    | .001    | 18<br>(0.7)   | 17<br>(1.0)   | 1.000    |
| <b>Psoriasis</b>                         | 76<br>(0.9)    | 103<br>(1.1)   | 45<br>(0.8)    | 84<br>(1.1)    | 1.000   | 31<br>(1.1)   | 19<br>(1.1)   | 1.000    |
| <b>Atrial fibrillation</b>               | 65<br>(0.8)    | 68<br>(0.7)    | 50<br>(0.9)    | 50<br>(0.7)    | 1.000   | 15<br>(0.6)   | 18<br>(1.0)   | 1.000    |
| <b>Transient Ischaemic Attack</b>        | 79<br>(1.0)    | 51<br>(0.5)    | 53<br>(1.0)    | 38<br>(0.5)    | .037    | 26<br>(1.0)   | 13<br>(0.7)   | 1.000    |
| <b>Inflammatory Bowel diseases</b>       | 26<br>(0.3)    | 14<br>(0.1)    | 18<br>(0.3)    | 7<br>(0.1)     | .080    | 8<br>(0.3)    | 7<br>(0.4)    | 1.000    |

---

|                              |             |             |            |             |   |            |            |   |
|------------------------------|-------------|-------------|------------|-------------|---|------------|------------|---|
| <b>Multiple Sclerosis</b>    | 17<br>(0.2) | 15<br>(0.2) | 9<br>(0.2) | 10<br>(0.1) | - | 8<br>(0.3) | 5<br>(0.3) | - |
| <b>Chronic liver disease</b> | 10<br>(0.1) | 12<br>(0.1) | 9          | 11<br>(0.1) | - | 1<br>(0.0) | 1<br>(0.1) | - |
| <b>Chronic Sinusitis</b>     | 3<br>(0.0)  | 3<br>(0.0)  | 3          | 3<br>(0.0)  | - | 0<br>(0.0) | 0<br>(0.0) | - |

---

Note. \*\*\* p < .001; \*\* p < .01; \* p < .05 for comparisons between male and female groups in the whole SMI cohort

*Supplemental Table 3. Prevalence for each condition for the whole cohort and diagnoses subgroups and across age ranges at first SMI diagnosis.*

|                               | Total         |               |               |               |               | SSD           |               |               |               |               | BD           |              |              |               |               |               |              |
|-------------------------------|---------------|---------------|---------------|---------------|---------------|---------------|---------------|---------------|---------------|---------------|--------------|--------------|--------------|---------------|---------------|---------------|--------------|
|                               | 15-34         | 35-44         | 45-54         | 55-64         | 65+           | 15-34         | 35-44         | 45-54         | 55-64         | 65+           | 15-34        | 35-44        | 45-54        | 55-64         | 65+           |               |              |
| <b>Total</b>                  | 7497          | 3736          | 2783          | 1525          | 1959          | 5607          | 2792          | 2057          | 1067          | 1496          |              | 1890         | 944          | 726           | 458           | 463           |              |
| <b>Diabetes***</b>            | 697<br>(9.3)  | 559<br>(15.0) | 531<br>(19.1) | 371<br>(24.3) | 528<br>(27.0) | 591<br>(10.5) | 479<br>(17.2) | 439<br>(21.3) | 284<br>(26.6) | 415<br>(27.7) | p <<br>0.001 | 106<br>(5.6) | 80<br>(8.5)  | 92<br>(12.7)  | 87<br>(19.0)  | 113<br>(24.4) | p <<br>0.001 |
| <b>Hypertension***</b>        | 472<br>(6.3)  | 426<br>(11.4) | 514<br>(18.5) | 416<br>(27.)3 | 709<br>(36.2) | 412<br>(7.3)  | 372<br>(13.3) | 411<br>(20.0) | 313<br>(29.3) | 562<br>(37.6) | p <<br>0.001 | 60<br>(3.2)  | 54<br>(5.7)  | 103<br>(14.2) | 103<br>(22.5) | 147<br>(31.7) | p <<br>0.001 |
| <b>Asthma***</b>              | 820<br>(10.9) | 347<br>(9.3)  | 297<br>(10.7) | 126<br>(8.3)  | 132<br>(6.7)  | 635<br>(11.3) | 248<br>(8.9)  | 218<br>(10.6) | 89<br>(8.3)   | 101<br>(6.8)  | p <<br>0.001 | 185<br>(9.8) | 99<br>(10.5) | 79<br>(10.9)  | 37<br>(8.1)   | 31<br>(6.7)   | p =<br>1.000 |
| <b>Arthritis***</b>           | 125<br>(1.7)  | 154<br>(4.1)  | 229<br>(8.2)  | 167<br>(11.0) | 279<br>(14.2) | 93<br>(1.7)   | 120<br>(4.3)  | 159<br>(7.7)  | 118<br>(11.1) | 212<br>(14.2) | p <<br>0.001 | 32<br>(1.7)  | 34<br>(3.6)  | 70<br>(9.6)   | 49<br>(10.7)  | 67<br>(14.5)  | p <<br>0.001 |
| <b>Epilepsy</b>               | 339<br>(4.5)  | 188<br>(5.0)  | 133<br>(4.8)  | 67<br>(4.4)   | 72<br>(3.7)   | 276<br>(4.9)  | 154<br>(5.5)  | 112<br>(5.4)  | 55<br>(5.2)   | 55<br>(3.7)   | 1.000        | 63<br>(3.3)  | 34<br>(3.6)  | 21<br>(2.9)   | 12<br>(2.6)   | 17<br>(3.7)   | 1.000        |
| <b>CVA***</b>                 | 166<br>(2.2)  | 112<br>(3.0)  | 122<br>(4.4)  | 114<br>(7.5)  | 214<br>(10.9) | 143<br>(2.6)  | 87<br>(3.1)   | 95<br>(4.6)   | 84<br>(7.9)   | 164<br>(11.0) | p <<br>0.001 | 23<br>(1.2)  | 25<br>(2.6)  | 27<br>(3.7)   | 30<br>(6.6)   | 50<br>(10.8)  | p <<br>0.001 |
| <b>Eczema</b>                 | 310<br>(4.1)  | 115<br>(3.1)  | 79<br>(2.8)   | 50<br>(3.3)   | 62<br>(3.2)   | 244<br>(4.4)  | 88<br>(3.2)   | 58<br>(2.8)   | 37<br>(3.5)   | 52<br>(3.5)   | 0.120        | 66<br>(3.5)  | 27<br>(2.9)  | 21<br>(2.9)   | 13<br>(2.8)   | 10<br>(2.2)   | 1.000        |
| <b>Migraine***</b>            | 300<br>(4.0)  | 122<br>(3.3)  | 87<br>(3.1)   | 32<br>(2.1)   | 23<br>(1.2)   | 207<br>(3.7)  | 73<br>(2.6)   | 53<br>(2.6)   | 24<br>(2.2)   | 15<br>(1.0)   | p <<br>0.001 | 93<br>(4.9)  | 49<br>(5.2)  | 34<br>(4.7)   | 8<br>(1.7)    | 8<br>(1.7)    | 0.011        |
| <b>Isc heart disease***</b>   | 111<br>(1.5)  | 73<br>(2.0)   | 105<br>(3.8)  | 95<br>(6.2)   | 177<br>(9.0)  | 96<br>(1.7)   | 60<br>(2.1)   | 80<br>(3.9)   | 65<br>(6.1)   | 134<br>(9.0)  | p <<br>0.001 | 15<br>(0.8)  | 13<br>(1.4)  | 25<br>(3.4)   | 30<br>(6.6)   | 43<br>(9.3)   | p <<br>0.001 |
| <b>COPD***</b>                | 39<br>(0.5)   | 58<br>(1.6)   | 119<br>(4.3)  | 115<br>(7.5)  | 145<br>(7.4)  | 29<br>(0.5)   | 40<br>(1.4)   | 87<br>(4.2)   | 82<br>(7.7)   | 104<br>(7.0)  | p <<br>0.001 | 10<br>(0.5)  | 18<br>(1.9)  | 32<br>(4.4)   | 33<br>(7.2)   | 41<br>(8.9)   | p <<br>0.001 |
| <b>CKD***</b>                 | 12<br>(0.2)   | 18<br>(0.5)   | 41<br>(1.5)   | 55<br>(3.6)   | 153<br>(7.8)  | 9<br>(0.2)    | 14<br>(0.5)   | 28<br>(1.4)   | 33<br>(3.1)   | 95<br>(6.4)   | p <<br>0.001 | 3<br>(0.2)   | 4<br>(0.4)   | 13<br>(1.8)   | 22<br>(4.8)   | 58<br>(12.5)  | -            |
| <b>PD***</b>                  | 70<br>(0.9)   | 33<br>(0.9)   | 37<br>(1.3)   | 41<br>(2.7)   | 85<br>(4.3)   | 57<br>(1.0)   | 22<br>(0.8)   | 27<br>(1.3)   | 32<br>(3.0)   | 63<br>(4.2)   | p <<br>0.001 | 13<br>(0.7)  | 11<br>(1.2)  | 10<br>(1.4)   | 9<br>(2.0)    | 22<br>(4.8)   | p <<br>0.001 |
| <b>HF***</b>                  | 18<br>(0.2)   | 30<br>(0.8)   | 42<br>(1.5)   | 40<br>(2.6)   | 92<br>(4.7)   | 17<br>(0.3)   | 30<br>(1.1)   | 38<br>(1.8)   | 29<br>(2.7)   | 73<br>(4.9)   | p <<br>0.001 | 1<br>(0.1)   | 0<br>(0.0)   | 4<br>(0.6)    | 11<br>(2.4)   | 19<br>(4.1)   | -            |
| <b>Psoriasis</b>              | 67<br>(0.9)   | 33<br>(0.9)   | 37<br>(1.3)   | 17<br>(1.1)   | 25<br>(1.3)   | 54<br>(1.0)   | 25<br>(0.9)   | 25<br>(1.2)   | 9<br>(0.8)    | 16<br>(1.1)   | 1.000        | 13<br>(0.7)  | 8<br>(0.8)   | 12<br>(1.7)   | 8<br>(1.7)    | 9<br>(1.9)    | 0.450        |
| <b>Atrial fibrillation***</b> | 14<br>(0.2)   | 7<br>(0.2)    | 12<br>(0.4)   | 19<br>(1.2)   | 81<br>(4.1)   | 11<br>(0.2)   | 6<br>(0.2)    | 8<br>(0.4)    | 12<br>(0.1)   | 63<br>(4.2)   | p <<br>0.001 | 3<br>(0.20)  | 1<br>(0.1)   | 4<br>(0.6)    | 7<br>(1.5)    | 18<br>(3.9)   | -            |
| <b>TIA***</b>                 | 20<br>(0.3)   | 18<br>(0.5)   | 19<br>(0.7)   | 23<br>(1.5)   | 50<br>(2.6)   | 15<br>(0.3)   | 15<br>(0.5)   | 13<br>(0.6)   | 14<br>(1.3)   | 34<br>(2.3)   | p <<br>0.001 | 5<br>(0.3)   | 3<br>(0.3)   | 6<br>(0.8)    | 9<br>(2.0)    | 16<br>(3.5)   | -            |
| <b>IBD</b>                    | 9<br>(0.1)    | 8<br>(0.2)    | 12<br>(0.4)   | 6<br>(0.4)    | 5<br>(0.3)    | 4<br>(0.1)    | 6<br>(0.2)    | 7<br>(0.3)    | 3<br>(0.3)    | 5<br>(0.3)    | -            | 5<br>(0.3)   | 2<br>(0.2)   | 5<br>(0.7)    | 3<br>(0.7)    | 0<br>(0.0)    | -            |
| <b>MS</b>                     | 6<br>(0.1)    | 8<br>(0.2)    | 11<br>(0.4)   | 5<br>(0.3)    | 2<br>(0.1)    | 4<br>(0.1)    | 4<br>(0.1)    | 8<br>(0.4)    | 3<br>(0.3)    | 0<br>(0.0)    | -            | 2<br>(0.1)   | 4<br>(0.4)   | 3<br>(0.4)    | 2<br>(0.4)    | 2<br>(0.4)    | -            |

|                              |            |            |            |            |            |            |            |            |            |            |   |            |            |            |            |            |   |
|------------------------------|------------|------------|------------|------------|------------|------------|------------|------------|------------|------------|---|------------|------------|------------|------------|------------|---|
| <b>Chronic liver disease</b> | 5<br>(0.1) | 7<br>(0.2) | 6<br>(0.2) | 3<br>(0.2) | 1<br>(0.1) | 5<br>(0.1) | 7<br>(0.3) | 5<br>(0.2) | 2<br>(0.2) | 1<br>(0.1) | - | 0<br>(0.0) | 0<br>(0.0) | 1<br>(0.1) | 1<br>(0.2) | 0<br>(0.0) | - |
| <b>Chronic sinusitis</b>     | 5<br>(0.1) | 0<br>(0.0) | 1<br>(0.0) | 0<br>(0.0) | 0<br>(0.0) | 5<br>(0.1) | 0<br>(0.0) | 1<br>(0.0) | 0<br>(0.0) | 0<br>(0.0) | - | 0<br>(0.0) | 0<br>(0.0) | 0<br>(0.0) | 0<br>(0.0) | 0<br>(0.0) | - |

Note: \*\*\* p < .001; \*\* p < .01; \* p < .05 for comparisons between age groups within the SMI cohort.

Supplemental Tables 4. Prevalence for each condition for the whole cohort and diagnoses subgroups and across ethnicities

Table 4a. Prevalence for each condition for the whole cohort and ethnicity.

|                                 | White<br>British<br>n=6243<br>(35.7%) | Irish<br>n=346<br>(2.0%) | Black<br>Caribbean<br>n=3182<br>(18.2%) | Black<br>African<br>n=2094<br>(12.0%) | South<br>Asian<br>n=549<br>(3.1%) | Other <sup>§</sup><br>n=2846<br>(22.0%) | Unknown <sup>§</sup><br>n=1240<br>(7.1%) | Statistics                         |
|---------------------------------|---------------------------------------|--------------------------|-----------------------------------------|---------------------------------------|-----------------------------------|-----------------------------------------|------------------------------------------|------------------------------------|
| <b>Diabetes</b>                 | 837 (13.4)                            | 55 (15.9)                | 757 (23.8)                              | 382 (18.2)                            | 125 (22.8)                        | 461 (12.0)                              | 69 (5.6)                                 | $\chi^2$ (4) = 172.49; $p < 0.001$ |
| <b>Hypertension</b>             | 804 (12.9)                            | 63 (18.2)                | 678 (21.3)                              | 430 (20.5)                            | 102 (18.6)                        | 400 (10.4)                              | 60 (4.8)                                 | $\chi^2$ (4) = 137.98; $p < 0.001$ |
| <b>Asthma</b>                   | 651 (10.4)                            | 40 (11.6)                | 484 (15.2)                              | 156 (7.4)                             | 42 (7.7)                          | 296 (7.7)                               | 53 (4.3)                                 | $\chi^2$ (4) = 92.58; $p < 0.001$  |
| <b>Arthritis</b>                | 402 (6.4)                             | 29 (8.4)                 | 246 (7.7)                               | 90 (4.3)                              | 36 (6.6)                          | 139 (3.6)                               | 12 (1.0)                                 | $\chi^2$ (4) = 26.80; $p < 0.001$  |
| <b>Epilepsy</b>                 | 339 (5.4)                             | 26 (7.5)                 | 164 (5.2)                               | 77 (3.7)                              | 17 (3.1)                          | 147 (3.8)                               | 29 (2.4)                                 | $\chi^2$ (4) = 19.02; $p = 0.010$  |
| <b>Cerebrovascular accident</b> | 274 (4.4)                             | 20 (5.8)                 | 184 (5.8)                               | 92 (4.4)                              | 25 (4.6)                          | 116 (3.0)                               | 17 (1.4)                                 | $\chi^2$ (4) = 10.60; $p = 0.408$  |
| <b>Eczema</b>                   | 222 (3.6)                             | 7 (2.0)                  | 185 (5.8)                               | 61 (2.9)                              | 17 (3.1)                          | 108 (2.8)                               | 16 (1.3)                                 | $\chi^2$ (4) = 41.93; $p < 0.001$  |
| <b>Migraine</b>                 | 235 (3.8)                             | 12 (3.5)                 | 129 (4.1)                               | 61 (2.9)                              | 17 (3.1)                          | 98 (2.5)                                | 12 (1.0)                                 | $\chi^2$ (4) = 5.44; $p > .99$     |
| <b>Ischemic heart disease</b>   | 261 (4.2)                             | 13 (3.8)                 | 108 (3.4)                               | 48 (2.3)                              | 19 (3.5)                          | 99 (2.6)                                | 13 (1.0)                                 | $\chi^2$ (4) = 16.74; $p = 0.028$  |
| <b>COPD</b>                     | 271 (4.3)                             | 32 (9.2)                 | 63 (2.0)                                | 21 (1.0)                              | 14 (2.6)                          | 60 (1.6)                                | 15 (1.2)                                 | $\chi^2$ (4) = 114.69; $p < 0.001$ |
| <b>CKD</b>                      | 125 (2.0)                             | 9 (2.6)                  | 56 (1.8)                                | 32 (1.5)                              | 13 (2.4)                          | 37 (1.0)                                | 7 (0.6)                                  | $\chi^2$ (4) = 3.81; $p > .99$     |
| <b>Parkinson's disease</b>      | 117 (1.9)                             | 6 (1.7)                  | 56 (1.8)                                | 25 (1.2)                              | 11 (2.0)                          | 45 (1.2)                                | 6 (0.5)                                  | $\chi^2$ (4) = 4.56; $p > .99$     |
| <b>Heart failure</b>            | 88 (1.4)                              | 8 (2.3)                  | 55 (1.7)                                | 29 (1.4)                              | 8 (1.5)                           | 31 (0.8)                                | 3 (0.2)                                  | $\chi^2$ (4) = 3.16; $p > .99$     |
| <b>Psoriasis</b>                | 103 (1.6)                             | 4 (1.2)                  | 12 (0.4)                                | 6 (0.3)                               | 5 (0.9)                           | 44 (1.1)                                | 5 (0.4)                                  | *                                  |
| <b>Atrial fibrillation</b>      | 69 (1.1)                              | 9 (2.6)                  | 23 (0.7)                                | 11 (0.5)                              | 2 (0.4)                           | 15 (0.4)                                | 4 (0.3)                                  | *                                  |



|                              |          |         |          |          |         |          |         |   |
|------------------------------|----------|---------|----------|----------|---------|----------|---------|---|
| <b>TIA</b>                   | 58 (0.9) | 7 (2.0) | 24 (0.8) | 15 (0.7) | 7 (1.3) | 13 (0.3) | 6 (0.5) | * |
| <b>IBD</b>                   | 24 (0.4) | 1 (0.3) | 2 (0.1)  | 2 (0.1)  | 1 (0.2) | 9 (0.2)  | 1 (0.1) | * |
| <b>Multiple sclerosis</b>    | 21 (0.3) | 1 (0.3) | 3 (0.1)  | 1 (0.0)  | 0 (0.0) | 4 (0.1)  | 2 (0.2) | * |
| <b>Chronic liver disease</b> | 9 (0.1)  | 1 (0.3) | 1 (0.0)  | 6 (0.3)  | 0 (0.0) | 5 (0.1)  | 0 (0.0) | * |
| <b>Chronic sinusitis</b>     | 1 (0.0)  | 0 (0.0) | 3 (0.1)  | 1 (0.0)  | 0 (0.0) | 1 (0.0)  | 0 (0.0) | * |

<sup>§</sup>Categories were dropped for statistical analysis. \* $\chi^2$  test not performed due to small population sizes

Table 4b. Prevalence for each condition across ethnicities in SSD.

|                                     | <b>White<br/>British<br/>n=4008<br/>(30.8%)</b> | <b>Irish<br/>n=240<br/>(1.8%)</b> | <b>Black<br/>Caribbean<br/>n=2799<br/>(21.5%)</b> | <b>Black<br/>African<br/>n=1886<br/>(14.5%)</b> | <b>South<br/>Asian<br/>n=421<br/>(3.2%)</b> | <b>Other<sup>§</sup><br/>n=2822<br/>(21.7%)</b> | <b>Unknown<sup>§</sup><br/>n=843<br/>(6.5%)</b> | <b>Statistics</b>                    |
|-------------------------------------|-------------------------------------------------|-----------------------------------|---------------------------------------------------|-------------------------------------------------|---------------------------------------------|-------------------------------------------------|-------------------------------------------------|--------------------------------------|
| <b>Diabetes</b>                     | 602 (15.0)                                      | 37 (15.4)                         | 682 (24.4)                                        | 351 (18.6)                                      | 87 (20.7)                                   | 390 (13.8)                                      | 59 (7.0)                                        | $\chi^2$ (4) =<br>97.10; $p$ <0.001  |
| <b>Hypertension</b>                 | 573 (14.3)                                      | 47 (19.6)                         | 606 (21.7)                                        | 396 (21.0)                                      | 77 (18.3)                                   | 322 (11.4)                                      | 49 (5.8)                                        | $\chi^2$ (4) =<br>73.74; $p$ <0.001  |
| <b>Asthma</b>                       | 443 (11.1)                                      | 23 (9.6)                          | 408 (14.6)                                        | 134 (7.1)                                       | 26 (6.2)                                    | 217 (7.7)                                       | 40 (4.7)                                        | $\chi^2$ (4) =<br>75.96; $p$ <0.001  |
| <b>Arthritis</b>                    | 252 (6.3)                                       | 17 (7.1)                          | 206 (7.4)                                         | 86 (4.6)                                        | 29 (6.9)                                    | 103 (3.6)                                       | 9 (1.1)                                         | $\chi^2$ (4) =<br>15.48; $p$ = 0.038 |
| <b>Epilepsy</b>                     | 261 (6.5)                                       | 23 (9.6)                          | 141 (5.0)                                         | 70 (3.7)                                        | 14 (3.3)                                    | 117 (4.1)                                       | 26 (3.1)                                        | $\chi^2$ (4) =<br>32.45; $p$ <0.001  |
| <b>Cerebrovascular<br/>accident</b> | 188 (4.7)                                       | 15 (6.2)                          | 159 (5.7)                                         | 82 (4.3)                                        | 18 (4.3)                                    | 96 (3.4)                                        | 15 (1.8)                                        | $\chi^2$ (4) =<br>6.48; $p$ >0.99    |
| <b>Eczema</b>                       | 145 (3.6)                                       | 4 (1.7)                           | 159 (5.7)                                         | 54 (2.9)                                        | 12 (2.9)                                    | 93 (3.3)                                        | 12 (1.4)                                        | $\chi^2$ (4) =<br>33.32; $p$ <0.001  |
| <b>Migraine</b>                     | 126 (3.1)                                       | 10 (4.2)                          | 110 (3.9)                                         | 48 (2.5)                                        | 12 (2.9)                                    | 59 (2.1)                                        | 7 (0.8)                                         | $\chi^2$ (4) =<br>8.03; $p$ = 0.904  |
| <b>Ischemic heart disease</b>       | 187 (4.7)                                       | 9 (3.8)                           | 98 (3.5)                                          | 46 (2.4)                                        | 13 (3.1)                                    | 74 (2.6)                                        | 8 (0.9)                                         | $\chi^2$ (4) =<br>19.15; $p$ = 0.007 |
| <b>COPD</b>                         | 190 (4.7)                                       | 18 (7.5)                          | 51 (1.8)                                          | 16 (0.8)                                        | 9 (2.1)                                     | 44 (1.6)                                        | 14 (1.7)                                        | $\chi^2$ (4) =<br>101.62; $p$ <0.001 |
| <b>CKD</b>                          | 64 (1.6)                                        | 5 (2.1)                           | 45 (1.6)                                          | 26 (1.4)                                        | 10 (2.4)                                    | 24 (0.9)                                        | 5 (0.6)                                         | *                                    |
| <b>Parkinson's disease</b>          | 79 (2.0)                                        | 4 (1.7)                           | 49 (1.8)                                          | 21 (1.1)                                        | 6 (1.4)                                     | 36 (1.3)                                        | 6 (0.7)                                         | *                                    |

|                              |          |         |          |          |         |          |         |   |
|------------------------------|----------|---------|----------|----------|---------|----------|---------|---|
| <b>Heart failure</b>         | 65 (1.6) | 8 (3.3) | 50 (1.8) | 28 (1.5) | 7 (1.7) | 26 (0.9) | 3 (0.4) | * |
| <b>Psoriasis</b>             | 66 (1.6) | 2 (0.8) | 9 (0.3)  | 6 (0.3)  | 4 (1.0) | 37 (1.3) | 5 (0.6) | * |
| <b>Atrial fibrillation</b>   | 46 (1.1) | 7 (2.9) | 22 (0.8) | 11 (0.6) | 1 (0.2) | 10 (0.4) | 3 (0.4) | * |
| <b>TIA</b>                   | 34 (0.8) | 5 (2.1) | 21 (0.8) | 13 (0.7) | 6 (1.4) | 8 (0.3)  | 4 (0.5) | * |
| <b>IBD</b>                   | 12 (0.3) | 1 (0.4) | 2 (0.1)  | 2 (0.1)  | 1 (0.2) | 6 (0.2)  | 1 (0.1) | * |
| <b>Multiple sclerosis</b>    | 12 (0.3) | 1 (0.4) | 3 (0.1)  | 0 (0.0)  | 0 (0.0) | 2 (0.1)  | 1 (0.1) | * |
| <b>Chronic liver disease</b> | 7 (0.2)  | 1 (0.4) | 1 (0.0)  | 6 (0.3)  | 0 (0.0) | 5 (0.2)  | 0 (0.0) | * |
| <b>Chronic sinusitis</b>     | 1 (0.0)  | 0 (0.0) | 3 (0.1)  | 1 (0.1)  | 0 (0.0) | 1 (0.0)  | 0 (0.0) | * |

<sup>§</sup>Categories were dropped for statistical analysis. \* $\chi^2$  test not performed due to small population sizes

Table 4c. Prevalence for each condition across ethnicities in BD.

|                                 | <b>White<br/>British<br/>n=2235<br/>(49.9%)</b> | <b>Irish<br/>n=106<br/>(2.4%)</b> | <b>Black<br/>Caribbean<br/>n=383<br/>(8.5%)</b> | <b>Black<br/>African<br/>n=208<br/>(4.6%)</b> | <b>South<br/>Asian<br/>n=128<br/>(2.9%)</b> | <b>Other<sup>§</sup><br/>n=1024<br/>(22.9%)</b> | <b>Unknown<sup>§</sup><br/>n=397<br/>(8.9%)</b> | <b>Statistics</b>                    |
|---------------------------------|-------------------------------------------------|-----------------------------------|-------------------------------------------------|-----------------------------------------------|---------------------------------------------|-------------------------------------------------|-------------------------------------------------|--------------------------------------|
| <b>Diabetes</b>                 | 235 (10.5)                                      | 18 (17.0)                         | 75 (19.6)                                       | 31 (14.9)                                     | 38 (29.7)                                   | 71 (6.9)                                        | 10 (2.5)                                        | $\chi^2$ (4) =<br>60.65; $p < 0.001$ |
| <b>Hypertension</b>             | 231 (10.3)                                      | 16 (15.1)                         | 72 (18.8)                                       | 34 (16.3)                                     | 25 (19.5)                                   | 78 (7.6)                                        | 11 (2.8)                                        | $\chi^2$ (4) =<br>32.99; $p < 0.001$ |
| <b>Asthma</b>                   | 208 (9.3)                                       | 17 (16.0)                         | 76 (19.8)                                       | 22 (10.6)                                     | 16 (12.5)                                   | 79 (7.7)                                        | 13 (3.3)                                        | $\chi^2$ (4) =<br>39.95; $p < 0.001$ |
| <b>Arthritis</b>                | 150 (6.7)                                       | 12 (11.3)                         | 40 (10.4)                                       | 4 (1.9)                                       | 7 (5.5)                                     | 36 (3.5)                                        | 3 (0.8)                                         | $\chi^2$ (4) =<br>19.09; $p = 0.004$ |
| <b>Epilepsy</b>                 | 78 (3.5)                                        | 3 (2.8)                           | 23 (6.0)                                        | 7 (3.4)                                       | 3 (2.3)                                     | 30 (2.9)                                        | 3 (0.8)                                         | *                                    |
| <b>Cerebrovascular accident</b> | 86 (3.8)                                        | 5 (4.7)                           | 25 (6.5)                                        | 10 (4.8)                                      | 7 (5.5)                                     | 20 (2.0)                                        | 2 (0.5)                                         | *                                    |
| <b>Eczema</b>                   | 77 (3.4)                                        | 3 (2.8)                           | 26 (6.8)                                        | 7 (3.4)                                       | 5 (3.9)                                     | 15 (1.5)                                        | 4 (1.0)                                         | *                                    |
| <b>Migraine</b>                 | 109 (4.9)                                       | 2 (1.9)                           | 19 (5.0)                                        | 13 (6.2)                                      | 5 (3.9)                                     | 39 (3.8)                                        | 5 (1.3)                                         | $\chi^2$ (4) =<br>3.17; $p > 0.99$   |
| <b>Ischemic heart disease</b>   | 74 (3.3)                                        | 4 (3.8)                           | 10 (2.6)                                        | 2 (1.0)                                       | 6 (4.7)                                     | 25 (2.4)                                        | 5 (1.3)                                         | *                                    |

|                              |          |           |          |         |         |          |         |   |
|------------------------------|----------|-----------|----------|---------|---------|----------|---------|---|
| <b>COPD</b>                  | 81 (3.6) | 14 (13.2) | 12 (3.1) | 5 (2.4) | 5 (3.9) | 16 (1.6) | 1 (0.3) | * |
| <b>CKD</b>                   | 61 (2.7) | 4 (3.8)   | 11 (2.9) | 6 (2.9) | 3 (2.3) | 13 (1.3) | 2 (0.5) | * |
| <b>Parkinson's disease</b>   | 38 (1.7) | 2 (1.9)   | 7 (1.8)  | 4 (1.9) | 5 (3.9) | 9 (0.9)  | 0 (0.0) | * |
| <b>Heart failure</b>         | 23 (1.0) | 0 (0.0)   | 5 (1.3)  | 1 (0.5) | 1 (0.8) | 5 (0.5)  | 0 (0.0) | * |
| <b>Psoriasis</b>             | 37 (1.7) | 2 (1.9)   | 3 (0.8)  | 0 (0.0) | 1 (0.8) | 7 (0.7)  | 0 (0.0) | * |
| <b>Atrial fibrillation</b>   | 23 (1.0) | 2 (1.9)   | 1 (0.3)  | 0 (0.0) | 1 (0.8) | 5 (0.5)  | 1 (0.3) | * |
| <b>TIA</b>                   | 24 (1.1) | 2 (1.9)   | 3 (0.8)  | 2 (1.0) | 1 (0.8) | 5 (0.5)  | 2 (0.5) | * |
| <b>IBD</b>                   | 12 (0.5) | 0 (0.0)   | 0 (0.0)  | 0 (0.0) | 0 (0.0) | 3 (0.3)  | 0 (0.0) | * |
| <b>Multiple sclerosis</b>    | 9 (0.4)  | 0 (0.0)   | 0 (0.0)  | 1 (0.5) | 0 (0.0) | 2 (0.2)  | 1 (0.3) | * |
| <b>Chronic liver disease</b> | 2 (0.1)  | 0 (0.0)   | 0 (0.0)  | 0 (0.0) | 0 (0.0) | 0 (0.0)  | 0 (0.0) | * |
| <b>Chronic sinusitis</b>     | 0 (0.0)  | 0 (0.0)   | 0 (0.0)  | 0 (0.0) | 0 (0.0) | 0 (0.0)  | 0 (0.0) | * |

---

<sup>§</sup>Categories were dropped for statistical analysis. \* $\chi^2$  test not performed due to small population sizes

Supplemental Table 5. Social deprivation prevalence for each condition for the whole cohort and within SSD and BD.

|                                | Total cohort             |            |            |             |                         |                               | SSD                      |            |            |             |                         |                               | AD                                 |                          |           |            |            |                         |                               |                                    |
|--------------------------------|--------------------------|------------|------------|-------------|-------------------------|-------------------------------|--------------------------|------------|------------|-------------|-------------------------|-------------------------------|------------------------------------|--------------------------|-----------|------------|------------|-------------------------|-------------------------------|------------------------------------|
|                                | 1 - least deprived n (%) | 2 n (%)    | 3 n (%)    | 4 n (%)     | 5 - most deprived n (%) | Not stated <sup>§</sup> n (%) | 1 - least deprived n (%) | 2 n (%)    | 3 n (%)    | 4 n (%)     | 5 - most deprived n (%) | Not stated <sup>§</sup> n (%) | Chi square                         | 1 - least deprived n (%) | 2 n (%)   | 3 n (%)    | 4 n (%)    | 5 - most deprived n (%) | Not stated <sup>§</sup> n (%) | Chi square                         |
| <b>Total</b>                   | 742 (100)                | 1384 (100) | 3575 (100) | 7073 (100)  | 4033 (100)              | 693 (100)                     | 412 (100)                | 887 (100)  | 2503 (100) | 5476 (100)  | 3204 (100)              | 537 (100)                     |                                    | 330 (100)                | 497 (100) | 1072 (100) | 1597 (100) | 829 (100)               | 156 (100)                     |                                    |
| <b>Diabetes ***</b>            | 62 (8.4)                 | 169 (12.2) | 528 (14.8) | 1201 (17.0) | 698 (17.3)              | 28 (4.0)                      | 49 (11.9)                | 117 (13.2) | 409 (16.3) | 1019 (18.6) | 594 (18.5)              | 20 (3.7)                      | X <sup>2</sup> (4) = 29.7; p<0.001 | 13 (3.9)                 | 52 (10.5) | 119 (11.1) | 182 (11.4) | 104 (12.5)              | 8 (5.1)                       | X <sup>2</sup> (4) = 19.4; p=0.007 |
| <b>Hypertension ***</b>        | 77 (10.4)                | 154 (11.1) | 468 (13.1) | 1189 (16.8) | 627 (15.5)              | 22 (3.2)                      | 51 (12.4)                | 108 (12.2) | 368 (14.7) | 1008 (18.4) | 517 (16.1)              | 18 (3.4)                      | X <sup>2</sup> (4) = 37.8; p<0.001 | 26 (7.9)                 | 46 (9.3)  | 100 (9.3)  | 181 (11.3) | 110 (13.3)              | 4 (2.6)                       | X <sup>2</sup> (4) = 12.3; p=0.17  |
| <b>Asthma ***</b>              | 42 (5.7)                 | 95 (6.9)   | 361 (10.1) | 758 (10.7)  | 432 (10.7)              | 34 (4.9)                      | 27 (6.6)                 | 61 (6.9)   | 251 (10.0) | 589 (10.8)  | 337 (10.5)              | 26 (4.8)                      | X <sup>2</sup> (4) = 19.0; p=0.01  | 15 (4.5)                 | 34 (6.8)  | 110 (10.3) | 169 (10.6) | 95 (11.5)               | 8 (5.1)                       | X <sup>2</sup> (4) = 19.2; p=0.008 |
| <b>Arthritis</b>               | 36 (4.9)                 | 56 (4.0)   | 188 (5.3)  | 411 (5.8)   | 256 (6.3)               | 7 (1.0)                       | 18 (4.4)                 | 36 (4.1)   | 135 (5.4)  | 312 (5.7)   | 197 (6.1)               | 4 (0.7)                       | X <sup>2</sup> (4) = 7.30; p>0.99  | 18 (5.5)                 | 20 (4.0)  | 53 (4.9)   | 99 (6.2)   | 59 (7.1)                | 3 (1.9)                       | X <sup>2</sup> (4) = 7.51; p>0.99  |
| <b>Epilepsy</b>                | 32 (4.3)                 | 50 (3.6)   | 160 (4.5)  | 344 (4.9)   | 202 (5.0)               | 11 (1.2)                      | 24 (5.8)                 | 40 (4.5)   | 123 (4.9)  | 292 (5.3)   | 164 (5.1)               | 9 (1.7)                       | X <sup>2</sup> (4) = 1.79; p>0.99  | 8 (2.4)                  | 10 (2.0)  | 37 (3.5)   | 52 (3.3)   | 38 (4.6)                | 2 (1.3)                       | X <sup>2</sup> (4) = 7.59; p>0.99  |
| <b>CVA</b>                     | 19 (2.6)                 | 52 (3.8)   | 146 (4.1)  | 328 (4.6)   | 180 (4.5)               | 3 (0.4)                       | 12 (2.9)                 | 33 (3.7)   | 107 (4.3)  | 272 (5.0)   | 146 (4.6)               | 3 (0.6)                       | X <sup>2</sup> (4) = 6.55; p>0.99  | 7 (2.1)                  | 19 (3.8)  | 39 (3.6)   | 56 (3.5)   | 34 (4.1)                | 0                             | X <sup>2</sup> (4) = 2.80; p>0.99  |
| <b>Eczema</b>                  | 22 (3.0)                 | 45 (3.3)   | 120 (3.4)  | 273 (3.9)   | 147 (3.6)               | 9 (1.3)                       | 17 (4.1)                 | 34 (3.8)   | 86 (3.4)   | 212 (3.9)   | 123 (3.8)               | 7 (1.3)                       | X <sup>2</sup> (4) = 1.11; p>0.99  | 5 (1.5)                  | 11 (2.2)  | 34 (3.2)   | 61 (3.8)   | 24 (2.9)                | 2 (1.3)                       | X <sup>2</sup> (4) = 6.90; p>0.99  |
| <b>Migraine</b>                | 17 (2.3)                 | 39 (2.8)   | 121 (3.4)  | 243 (3.4)   | 140 (3.5)               | 4 (0.6)                       | 11 (2.7)                 | 20 (2.3)   | 63 (2.5)   | 176 (3.2)   | 99 (3.1)                | 3 (0.6)                       | X <sup>2</sup> (4) = 4.79; p>0.99  | 6 (1.8)                  | 19 (3.8)  | 58 (5.4)   | 67 (4.2)   | 41 (4.9)                | 1 (0.6)                       | X <sup>2</sup> (4) = 8.94; p=0.69  |
| <b>Ischaemic heart disease</b> | 20 (2.7)                 | 48 (3.5)   | 103 (2.9)  | 240 (3.4)   | 143 (3.5)               | 7 (1.0)                       | 9 (2.2)                  | 33 (3.7)   | 74 (3.0)   | 194 (3.5)   | 120 (3.7)               | 5 (0.9)                       | X <sup>2</sup> (4) = 4.99; p>0.99  | 11 (3.3)                 | 15 (3.0)  | 29 (2.7)   | 46 (2.9)   | 23 (2.8)                | 2 (1.3)                       | X <sup>2</sup> (4) = 0.43; p>0.99  |
| <b>COPD **</b>                 | 6 (0.8)                  | 35 (2.5)   | 83 (2.3)   | 208 (2.9)   | 139 (3.4)               | 5 (0.7)                       | 3 (0.7)                  | 22 (2.5)   | 59 (2.4)   | 159 (2.9)   | 95 (3.0)                | 4 (0.7)                       | X <sup>2</sup> (4) = 9.07; p=0.77  | 3 (0.9)                  | 13 (2.6)  | 24 (2.2)   | 49 (3.1)   | 44 (5.3)                | 1 (0.6)                       | X <sup>2</sup> (4) = 21.9; p=0.002 |

|                              |             |             |             |              |             |            |            |             |             |             |             |            |                                         |            |             |             |             |             |            |                                      |
|------------------------------|-------------|-------------|-------------|--------------|-------------|------------|------------|-------------|-------------|-------------|-------------|------------|-----------------------------------------|------------|-------------|-------------|-------------|-------------|------------|--------------------------------------|
| <b>CKD</b>                   | 8<br>(1.1)  | 22<br>(1.6) | 46<br>(1.3) | 128<br>(1.8) | 74<br>(1.8) | 1<br>(0.1) | 4<br>(1.0) | 9<br>(1.0)  | 28<br>(1.1) | 81<br>(1.5) | 56<br>(1.7) | 1<br>(0.2) | X <sup>2</sup> (4) =<br>5.83;<br>p>0.99 | 4<br>(1.2) | 13<br>(2.6) | 18<br>(1.7) | 47<br>(2.9) | 18<br>(2.2) | 0          | X <sup>2</sup> (4) = 6.76;<br>p>0.99 |
| <b>PD</b>                    | 9<br>(1.2)  | 22<br>(1.6) | 51<br>(1.4) | 121<br>(1.7) | 60<br>(1.5) | 3<br>(0.4) | 5<br>(1.2) | 16<br>(1.8) | 33<br>(1.3) | 97<br>(1.8) | 48<br>(1.5) | 2<br>(0.4) | X <sup>2</sup> (4) =<br>3.13;<br>p>0.99 | 4<br>(1.2) | 6<br>(1.2)  | 18<br>(1.7) | 24<br>(1.5) | 12<br>(1.4) | 1<br>(0.6) | ---                                  |
| <b>Heart failure</b>         | 10<br>(1.3) | 12<br>(0.9) | 47<br>(1.3) | 92<br>(1.3)  | 58<br>(1.4) | 3<br>(0.4) | 7<br>(1.7) | 10<br>(1.1) | 39<br>(1.6) | 78<br>(1.4) | 52<br>(1.6) | 1<br>(0.2) | X <sup>2</sup> (4) =<br>1.54;<br>p=0.82 | 3<br>(0.9) | 2<br>(0.4)  | 8<br>(0.7)  | 14<br>(0.9) | 6<br>(0.7)  | 2<br>(1.3) | ---                                  |
| <b>Psoriasis</b>             | 11<br>(1.5) | 12<br>(0.9) | 33<br>(0.9) | 71<br>(1.0)  | 48<br>(1.2) | 4<br>(0.6) | 4<br>(1.0) | 6<br>(0.7)  | 24<br>(1.0) | 54<br>(1.0) | 37<br>(1.2) | 4<br>(0.7) | ---                                     | 7<br>(2.1) | 6<br>(1.2)  | 9<br>(0.8)  | 17<br>(1.1) | 11<br>(1.3) | 0          | ---                                  |
| <b>Atrial fibrillation</b>   | 10<br>(1.3) | 11<br>(0.8) | 27<br>(0.8) | 53<br>(0.7)  | 29<br>(0.7) | 3<br>(0.4) | 6<br>(1.5) | 7<br>(0.8)  | 21<br>(0.8) | 42<br>(0.8) | 23<br>(0.7) | 1<br>(0.2) | ---                                     | 4<br>(1.2) | 4<br>(0.8)  | 6<br>(0.6)  | 11<br>(0.7) | 6<br>(0.7)  | 2<br>(1.3) | ---                                  |
| <b>TIA</b>                   | 3<br>(0.3)  | 17<br>(1.0) | 27<br>(0.6) | 55<br>(0.6)  | 28<br>(0.5) | 0          | 1<br>(0.2) | 9<br>(1.0)  | 16<br>(0.6) | 43<br>(0.8) | 22<br>(0.7) | 0          | ---                                     | 2<br>(0.6) | 8<br>(1.6)  | 11<br>(1.0) | 12<br>(0.8) | 6<br>(0.7)  | 0          | ---                                  |
| <b>IBD</b>                   | 1<br>(0.1)  | 4<br>(0.3)  | 10<br>(0.3) | 12<br>(0.2)  | 13<br>(0.3) | 0          | 0          | 1<br>(0.1)  | 7<br>(0.3)  | 7<br>(0.1)  | 10<br>(0.3) | 0          | ---                                     | 1<br>(0.3) | 3<br>(0.6)  | 3<br>(0.3)  | 5<br>(0.3)  | 3<br>(0.4)  | 0          | ---                                  |
| <b>MS</b>                    | 4<br>(0.5)  | 2<br>(0.1)  | 7<br>(0.2)  | 14<br>(0.2)  | 4<br>(0.1)  | 1<br>(0.1) | 2<br>(0.5) | 2<br>(0.2)  | 2<br>(0.1)  | 9<br>(0.2)  | 3<br>(0.1)  | 1<br>(0.2) | ---                                     | 2<br>(0.6) | 0           | 5<br>(0.5)  | 5<br>(0.3)  | 1<br>(0.1)  | 0          | ---                                  |
| <b>Chronic liver disease</b> | 0           | 1<br>(0.1)  | 8<br>(0.2)  | 8<br>(0.1)   | 5<br>(0.1)  | 0          | 0          | 0           | 8<br>(0.3)  | 8<br>(0.1)  | 4<br>(0.1)  | 0          | ---                                     | 0          | 1<br>(0.2)  | 0           | 0           | 1<br>(0.1)  | 0          | ---                                  |
| <b>Chronic sinusitis</b>     | 0           | 0           | 1<br>(0.0)  | 2<br>(0.0)   | 3<br>(0.1)  | 0          | 0          | 0           | 1<br>(0.0)  | 2<br>(0.0)  | 3<br>(0.1)  | 0          | ---                                     | 0          | 0           | 0           | 0           | 0           | 0          | ---                                  |

\*, p<0.05; \*\*, p<0.01; \*\*\*, p<0.001; CVA, cerebrovascular accident; COPD, chronic obstructive lung disease; CKD, chronic kidney disease; PD, Parkinson's disease; TIA, transient ischemic attack; IBD, inflammatory bowel disease; MS, multiple sclerosis



Supplemental Table 6. Sociodemographic features of cohort in HoNOS subsample analysis

|                                         | <b>Total<br/>n (%)</b> | <b>SSD<br/>n (%)</b> | <b>BD<br/>n (%)</b> |
|-----------------------------------------|------------------------|----------------------|---------------------|
| <b>Totals n (%)</b>                     | 13650 (100.0)          | 10384 (76.1)         | 3266 (23.9)         |
| <b>Sex***</b>                           |                        |                      |                     |
| Female                                  | 6537 (47.9)            | 4526 (69.2)          | 2011 (30.8)         |
| Male                                    | 7112 (52.1)            | 5858 (82.4)          | 1254 (17.6)         |
| <b>Age at first SMI diagnosis***</b>    |                        |                      |                     |
| 15 – 34                                 | 5821 (42.6)            | 4420 (42.6)          | 1401 (42.9)         |
| 35 – 44                                 | 3430 (25.1)            | 2183 (75.3)          | 716 (24.7)          |
| 45 – 54                                 | 2082 (15.3)            | 1594 (76.6)          | 488 (23.4)          |
| 55 – 64                                 | 1089 (8.0)             | 811 (74.5)           | 278 (25.5)          |
| 65+                                     | 1759 (12.9)            | 1376 (13.3)          | 383 (11.7)          |
| <b>Ethnicity***</b>                     |                        |                      |                     |
| White British                           | 4571 (33.5)            | 2961 (64.8)          | 1610 (35.2)         |
| Black Caribbean                         | 2849 (20.9)            | 2515 (88.3)          | 334 (11.7)          |
| Black African                           | 1852 (13.6)            | 1679 (90.7)          | 173 (9.3)           |
| South Asian                             | 436 (3.2)              | 338 (77.5)           | 98 (22.5)           |
| Irish                                   | 286 (2.1)              | 197 (68.9)           | 89 (31.1)           |
| Other <sup>§</sup>                      | 3127 (22.9)            | 2327 (74.4)          | 800 (25.6)          |
| Not stated <sup>§</sup>                 | 529 (3.9)              | 367 (3.5)            | 162 (5.0)           |
| <b>Index of multiple deprivation***</b> |                        |                      |                     |
| 1 (least deprivation)                   | 380 (2.8)              | 237 (62.4)           | 143 (37.6)          |
| 2                                       | 883 (6.5)              | 581 (65.8)           | 302 (34.2)          |
| 3                                       | 2786 (20.4)            | 1994 (71.6)          | 792 (28.4)          |
| 4                                       | 5947 (43.6)            | 4654 (78.3)          | 1293 (21.7)         |
| 5 (most deprivation)                    | 3308 (24.2)            | 2650 (80.1)          | 658 (19.9)          |
| Unknown <sup>§</sup>                    | 346 (2.5)              | 268 (77.5)           | 78 (22.5)           |
| <b>Physical conditions***</b>           |                        |                      |                     |
| No mentions                             | 7232 (53.0)            | 5320 (73.6)          | 1912 (26.4)         |
| One                                     | 3295 (24.1)            | 2596 (78.8)          | 699 (21.2)          |
| Two                                     | 1669 (12.2)            | 1340 (80.3)          | 329 (19.7)          |
| Three or more                           | 1454 (10.7)            | 1128 (77.6)          | 326 (22.4)          |

Note. \*\*\*  $p < .001$  for comparisons between BD and SSD groups. <sup>§</sup>Not included in analyses.

Supplemental Table 7. Associations between comorbidities and HoNOS scores in SSD.

| Comorbidity                     | HoNOS Score  | Unadjusted                  | M1                          | M2a                         |
|---------------------------------|--------------|-----------------------------|-----------------------------|-----------------------------|
|                                 | Mean (SD)    | B (95% CI)                  | B (95% CI)                  | B (95% CI)                  |
| <b>Whole cohort</b>             | 10.75 (6.10) |                             |                             |                             |
| <b>Diabetes</b>                 | 11.04 (6.10) | 0.360<br>(0.067 – 0.654)**  | 0.224<br>(-0.073 – 0.522)   | 0.300<br>(-0.002 – 0.602)   |
| Ref: No diabetes                | 10.68 (6.10) |                             |                             |                             |
| <b>Hypertension</b>             | 11.17 (6.05) | 0.519<br>(0.220 – 0.818)*** | 0.264<br>(-0.048 – 0.575)   | 0.324<br>(0.006 – 0.641)*   |
| Ref: No hypertension            | 10.65 (6.11) |                             |                             |                             |
| <b>Asthma</b>                   | 11.19 (6.11) | 0.492<br>(0.126 – 0.859)**  | 0.551<br>(0.185 – 0.918)**  | 0.530<br>(0.158 – 0.903)**  |
| Ref: No asthma                  | 10.70 (6.10) |                             |                             |                             |
| <b>Arthritis</b>                | 12.08 (6.21) | 1.422<br>(0.948 – 1.895)*** | 1.259<br>(0.775 – 1.742)*** | 1.274<br>(0.788 – 1.759)*** |
| Ref: No arthritis               | 10.66 (6.08) |                             |                             |                             |
| <b>Epilepsy</b>                 | 11.53 (6.24) | 0.827<br>(0.316 – 1.337)*** | 0.850<br>(0.341 – 1.358)*** | 0.856<br>(0.341 – 1.370)*** |
| Ref: No epilepsy                | 10.71 (6.09) |                             |                             |                             |
| <b>CVA</b>                      | 11.87 (6.23) | 1.178<br>(0.651 – 1.705)*** | 0.913<br>(0.383 – 1.443)*** | 0.921<br>(0.388 – 1.454)**  |
| Ref: No CVA                     | 10.69 (6.09) |                             |                             |                             |
| <b>Eczema</b>                   | 11.48 (6.25) | 0.763<br>(0.188 – 1.338)**  | 0.846<br>(0.273 – 1.420)**  | 0.754<br>(0.172 – 1.336)*   |
| Ref: No eczema                  | 10.72 (6.09) |                             |                             |                             |
| <b>Migraine</b>                 | 10.71 (5.87) | -0.041<br>(-0.683 – 0.602)  | 0.196<br>(-0.447 – 0.839)   | 0.192<br>(-0.458 – 0.842)   |
| Ref: No migraine                | 10.75 (6.11) |                             |                             |                             |
| <b>Ischaemic heart disease</b>  | 11.59 (5.91) | 0.874<br>(0.274 – 1.474)**  | 0.520<br>(-0.083 – 1.124)   | 0.477<br>(-0.132 – 1.085)   |
| Ref: No ischaemic heart disease | 10.72 (6.11) |                             |                             |                             |
| <b>COPD</b>                     | 12.15 (5.70) | 1.444<br>(0.760 – 2.128)*** | 1.045<br>(0.354 – 1.736)**  | 1.043<br>(0.343 – 1.742)**  |
| Ref: No COPD                    | 10.71 (6.11) |                             |                             |                             |
| <b>Number of comorbidities</b>  |              | 0.387<br>(0.294 – 0.481)*** | 0.328<br>(0.231 – 0.425)*** | 0.342<br>(0.243 – 0.441)*** |
| <b>1 or more comorbidities</b>  | 11.13 (6.11) | 0.745<br>(0.511 – 0.980)*** | 0.607<br>(0.367 – 0.847)*** | 0.657<br>(0.410 – 0.903)*** |
| Ref: No comorbidities           | 10.39 (6.07) |                             |                             |                             |
| <b>2 or more comorbidities</b>  | 11.45 (6.16) | 0.921<br>(0.646 – 1.196)*** | 0.747<br>(0.464 – 1.030)*** | 0.771<br>(0.484 – 1.059)*** |
| Ref: Less than 1 comorbidities  | 10.53 (6.07) |                             |                             |                             |



Supplemental Table 8. Associations between comorbidities and HoNOS scores in BD.

| Comorbidity                     | HoNOS Score   | Unadjusted                  | M1                          | M2a                         |
|---------------------------------|---------------|-----------------------------|-----------------------------|-----------------------------|
|                                 | Mean (SD)     | B (95% CI)                  | B (95% CI)                  | B (95% CI)                  |
| <b>Whole cohort</b>             | 9.28 (5.77)   |                             |                             |                             |
| <b>Diabetes</b>                 | 10.941 (5.97) | 1.304<br>(0.720 – 1.887)*** | 0.968<br>(0.370 – 1.565)**  | 0.961<br>(0.355 – 1.568)**  |
| Ref: No diabetes                | 9.11 (5.72)   |                             |                             |                             |
| <b>Hypertension</b>             | 10.13 (5.82)  | 0.972<br>(0.384 – 1.561)**  | 0.446<br>(-0.182 – 1.074)   | 0.277<br>(-0.359 – 0.912)   |
| Ref: No hypertension            | 9.15 (5.76)   |                             |                             |                             |
| <b>Asthma</b>                   | 10.61 (6.27)  | 1.512<br>(0.900 – 2.124)*** | 1.597<br>(0.985 – 2.210)*** | 1.503<br>(0.887 – 2.120)*** |
| Ref: No asthma                  | 9.10 (5.68)   |                             |                             |                             |
| <b>Arthritis</b>                | 11.81 (6.13)  | 2.725<br>(1.960 – 3.490)*** | 2.487<br>(1.702 – 3.273)*** | 2.396<br>(1.606 – 3.186)*** |
| Ref: No arthritis               | 9.09 (5.70)   |                             |                             |                             |
| <b>Epilepsy</b>                 | 10.77 (5.96)  | 1.552<br>(0.513 – 2.591)**  | 1.587<br>(0.551 – 2.624)**  | 1.496<br>(0.466 – 2.527)**  |
| Ref: No epilepsy                | 9.22 (5.76)   |                             |                             |                             |
| <b>CVA</b>                      | 11.60 (6.16)  | 2.425<br>(1.464 – 3.386)*** | 2.098<br>(1.124 – 3.071)*** | 2.030<br>(1.064 – 2.996)*** |
| Ref: No CVA                     | 9.17 (5.73)   |                             |                             |                             |
| <b>Eczema</b>                   | 9.83 (5.82)   | 0.578<br>(-0.446 – 1.603)   | 0.622<br>(-0.400 – 1.644)   | 0.427<br>(-0.603 – 1.458)   |
| Ref: No eczema                  | 9.26 (5.77)   |                             |                             |                             |
| <b>Migraine</b>                 | 9.55 (5.34)   | 0.284<br>(-0.586 – 1.154)   | 0.523<br>(-0.350 – 1.397)   | 0.527<br>(-0.346 – 1.400)   |
| Ref: No migraine                | 9.26 (5.80)   |                             |                             |                             |
| <b>Ischaemic heart disease</b>  | 11.84 (5.95)  | 2.649<br>(1.560 – 3.738)*** | 2.093<br>(0.987 – 3.200)*** | 2.204<br>(1.098 – 3.309)**  |
| Ref: No ischaemic heart disease | 9.19 (5.75)   |                             |                             |                             |
| <b>COPD</b>                     | 11.89 (5.99)  | 2.711<br>(1.679 – 3.743)*** | 2.298<br>(1.248 – 3.348)*** | 2.128<br>(1.077 – 3.179)*** |
| Ref: No COPD                    | 9.18 (5.74)   |                             |                             |                             |
| <b>Number of comorbidities</b>  |               | 0.723<br>(0.566 – 0.879)*** | 0.661<br>(0.494 – 0.828)*** | 0.642<br>(0.473 – 0.811)*** |
| <b>1 or more comorbidities</b>  | 10.30 (5.91)  | 1.740<br>(1.343 – 2.138)*** | 1.559<br>(1.143 – 1.974)*** | 1.457<br>(1.031 – 1.883)*** |
| Ref: No comorbidities           | 8.56 (5.57)   |                             |                             |                             |
| <b>2 or more comorbidities</b>  | 10.89 (5.99)  | 2.013<br>(1.524 – 2.503)*** | 1.797<br>(1.280 – 2.314)*** | 1.789<br>(1.267 – 2.311)*** |
| Ref: Less than 1 comorbidities  | 8.88 (5.64)   |                             |                             |                             |

Supplemental Figure 1. Distribution of all conditions in the SMI cohort by SMI diagnoses

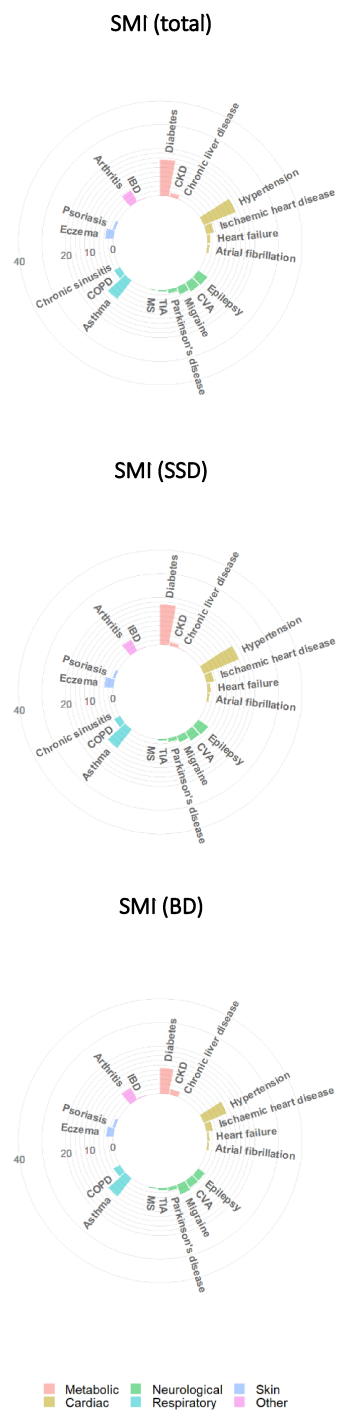

Supplemental Figure 2. Prevalence rates for age at SMI diagnoses per condition and comparison between individuals with BD and SSD.

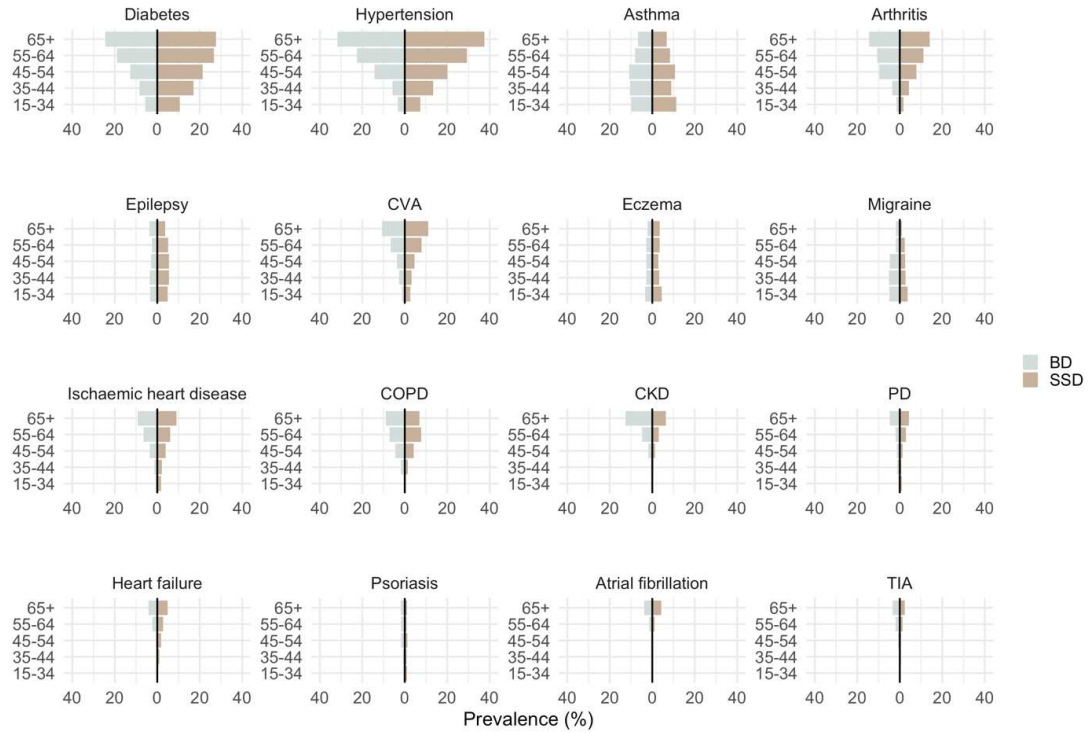

**Appendix 1. SNOMED Container and Concept Level Groupings for physical health conditions included in this study.**

| <b>Container Concept</b>                                         | <b>Concepts</b>                                                                                                                                                                                                                                                                                                                         |
|------------------------------------------------------------------|-----------------------------------------------------------------------------------------------------------------------------------------------------------------------------------------------------------------------------------------------------------------------------------------------------------------------------------------|
| S-73211009 - Diabetes mellitus (disorder)                        | S-44054006 - Diabetes mellitus type 2 (disorder)<br>S-46635009 - Diabetes mellitus type 1 (disorder)<br>S-422088007 - Disorder of nervous system co-occurrent and due to diabetes mellitus (disorder)<br>S-25093002 - Disorder of eye co-occurrent and due to diabetes mellitus (disorder)<br>S-73211009 - Diabetes mellitus (disorder) |
| S-84114007 - Heart failure (disorder)                            | S-128404006 - Right heart failure (disorder)<br>S-48447003 - Chronic heart failure (disorder)<br>S-56675007 - Acute heart failure (disorder)<br>S-85232009 - Left heart failure (disorder)<br>S-42343007 - Congestive heart failure (disorder)<br>S-84114007 - Heart failure (disorder)                                                 |
| S-414545008 - Ischemic heart disease (disorder)                  | S-413439005 - Acute ischemic heart disease (disorder)<br>S-413838009 - Chronic ischemic heart disease (disorder)<br>S-194828000 - Angina (disorder)<br>S-22298006 - Myocardial infarction (disorder)<br>S-414545008 - Ischemic heart disease (disorder)                                                                                 |
| S-38341003 - Hypertensive disorder, systemic arterial (disorder) | S-31992008 - Secondary hypertension (disorder)<br>S-48146000 - Diastolic hypertension (disorder)<br>S-56218007 - Systolic hypertension (disorder)<br>S-59621000 - Essential hypertension (disorder)<br>S-38341003 - Hypertensive disorder, systemic arterial (disorder)                                                                 |
| S-13645005 - Chronic obstructive lung disease (disorder)         | S-195951007 - Acute exacerbation of chronic obstructive airways disease (disorder)<br>S-87433001 - Pulmonary emphysema (disorder)<br>S-13645005 - Chronic obstructive lung disease (disorder)                                                                                                                                           |
| S-195967001 - Asthma (disorder)                                  | S-195967001 - Asthma (disorder)                                                                                                                                                                                                                                                                                                         |
| S-709044004 - Chronic kidney disease (disorder)                  | S-723190009 - Chronic renal insufficiency (disorder)<br>S-709044004 - Chronic kidney disease (disorder)                                                                                                                                                                                                                                 |

|                                                    |                                                                                                                                                                                                                                                                                                                                                                                                       |
|----------------------------------------------------|-------------------------------------------------------------------------------------------------------------------------------------------------------------------------------------------------------------------------------------------------------------------------------------------------------------------------------------------------------------------------------------------------------|
| S-230690007 - Cerebrovascular accident (disorder)  | S-25133001 - Completed stroke (disorder)<br>S-371040005 - Thrombotic stroke (disorder)<br>S-371041009 - Embolic stroke (disorder)<br>S-413102000 - Infarction of basal ganglia (disorder)<br>S-422504002 - Ischemic stroke (disorder)<br>S-723082006 - Silent cerebral infarct (disorder)<br>S-1078001000000105 - Haemorrhagic stroke (disorder)<br>S-230690007 - Cerebrovascular accident (disorder) |
| S-266257000 - Transient ischemic attack (disorder) | S-266257000 - Transient ischemic attack (disorder)                                                                                                                                                                                                                                                                                                                                                    |
| S-49049000 - Parkinson's disease (disorder)        | S-49049000 - Parkinson's disease (disorder)                                                                                                                                                                                                                                                                                                                                                           |
| S-24700007 - Multiple sclerosis (disorder)         | S-24700007 - Multiple sclerosis (disorder)                                                                                                                                                                                                                                                                                                                                                            |
| S-84757009 - Epilepsy (disorder)                   | S-352818000 - Tonic-clonic epilepsy (disorder)<br>S-19598007 - Generalized epilepsy (disorder)<br>S-230456007 - Status epilepticus (disorder)<br>S-509341000000107 - Petit-mal epilepsy (disorder)<br>S-84757009 - Epilepsy (disorder)                                                                                                                                                                |
| S-37796009 - Migraine (disorder)                   | S-37796009 - Migraine (disorder)<br>S-4473006 - Migraine with aura (disorder)<br>S-56097005 - Migraine without aura (disorder)                                                                                                                                                                                                                                                                        |
| S-53741008 - Coronary arteriosclerosis (disorder)  | S-810681000000101 - Coronary microvascular disease (disorder)<br>S-53741008 - Coronary arteriosclerosis (disorder)                                                                                                                                                                                                                                                                                    |
| S-49436004 - Atrial fibrillation (disorder)        | S-49436004 - Atrial fibrillation (disorder)                                                                                                                                                                                                                                                                                                                                                           |
| S-40055000 - Chronic sinusitis (disorder)          | S-40055000 - Chronic sinusitis (disorder)                                                                                                                                                                                                                                                                                                                                                             |
| S-24526004 - Inflammatory bowel disease (disorder) | S-24526004 - Inflammatory bowel disease (disorder)<br>S-397173003 - Crohn's disease of intestine (disorder)<br>S-64766004 - Ulcerative colitis (disorder)                                                                                                                                                                                                                                             |
| S-328383001 - Chronic liver disease (disorder)     | S-328383001 - Chronic liver disease (disorder)<br>S-76783007 - Chronic hepatitis (disorder)<br>S-79720007 - Chronic nonalcoholic liver disease (disorder)                                                                                                                                                                                                                                             |

|                                  |                                                                                                                                                                                                                             |
|----------------------------------|-----------------------------------------------------------------------------------------------------------------------------------------------------------------------------------------------------------------------------|
|                                  | S-713181003 - Chronic alcoholic liver disease (disorder)                                                                                                                                                                    |
| S-9014002 - Psoriasis (disorder) | S-9014002 - Psoriasis (disorder)                                                                                                                                                                                            |
| S-43116000 - Eczema (disorder)   | S-43116000 - Eczema (disorder)                                                                                                                                                                                              |
| S-3723001 - Arthritis (disorder) | S-69896004 - Rheumatoid arthritis (disorder)<br>S-399112009 - Seronegative arthritis (disorder)<br>S-35908007 - Chronic arthritis (disorder)<br>S-11939005 - Acute arthritis (disorder)<br>S-3723001 - Arthritis (disorder) |
